# Supplementary material for: Haplotype function score improves biological interpretation and cross-ancestry polygenic prediction of human complex traits
Source: eLife. 2024 Apr 19;12:RP92574. doi: 10.7554/eLife.92574 (PMC11031082; doi:10.7554/eLife.92574)
Supplement: Supplementary file 1. [file elife-92574-supp1.xlsx]

## Sheet: a
r: Pearson correlation coefficient between adjacent loci HFS.
class: sequence class of reference sequence.
nhap: number of haplotypes within this locus.
convert: number of haplotypes whose sequence clasee are different from reference haplotype.
ref: sequence class score of reference sequence.
lower & upper: minimum and maximum sequence class score of reference sequence class for all haplotypes.
only shows the first few lines, the full data could be found at data folder at github main page.
chr	start	end	locus ID	block	r	class	nhap	convert	ref	lower	upper
chr1	776572	780668	4	1	0.0931851	P_Promoter	145	0	67.27	62.1	68.71
chr1	815824	819920	6	1	-0.283317	E4_Multi-tissue	234	1	8.31	7.52	9.99
chr1	819920	824016	8	1	-0.0152009	TN3_Transcription	423	8	2.74	2.6	2.82
chr1	824976	829072	10	1	0.00661463	P_Promoter	154	0	46.96	43.74	60.39
chr1	829072	833168	12	1	0.634324	TF5_AR	150	22	1.76	1.56	2.24
chr1	833168	837264	14	1	-0.1355	PC1_Polycomb_/_Heterochromatin	296	5	0.34	0.31	0.46
chr1	840772	844868	16	1	0.145011	E12_Erythroblast-like	309	0	10.01	7.89	10.25
chr1	843572	847668	18	1	-0.0774182	E1_Stem_cell	412	0	4.35	4.2	4.75
chr1	852972	857068	20	1	-0.0312341	TN1_Transcription	321	0	6.67	6.43	6.76
chr1	863772	867868	22	1	-0.150071	E5_B-cell-like	1147	0	9.56	6.57	12.06
chr1	867972	872068	24	1	0.0051706	CTCF_CTCF-Cohesin	1231	3	33.81	29.48	36.18
chr1	878624	882720	26	1	0.0580403	E10_Brain	168	17	1.11	0.69	1.71
chr1	882720	886816	28	1	-0.00220286	HET2_Heterochromatin	195	3	0.6	0.49	0.9
chr1	903624	907720	30	1	-0.0651939	PC4_Polycomb_/_Bivalent_stem_cell_Enh	1085	68	12.17	11.73	13.88
chr1	907720	911816	32	1	-0.314957	PC4_Polycomb_/_Bivalent_stem_cell_Enh	1504	0	2.93	1.18	3.61
chr1	911572	915668	34	1	-0.00114453	PC1_Polycomb_/_Heterochromatin	1453	0	4.04	3.46	4.42
chr1	918928	923024	36	1	-0.53972	E4_Multi-tissue	1073	562	6.71	5.38	8.91
chr1	923024	927120	38	1	-0.36789	P_Promoter	201	0	29.16	28.12	30.96
chr1	927120	931216	40	1	-0.0442746	PC4_Polycomb_/_Bivalent_stem_cell_Enh	1149	52	2.13	1.55	2.61
chr1	931216	935312	42	1	0.0466979	TF3_FOXA1_/_AR_/_ESR1	937	0	16.37	11.83	17.12
chr1	933788	937884	44	1	-0.268004	PC4_Polycomb_/_Bivalent_stem_cell_Enh	1364	0	11.02	10.02	12.74
chr1	937884	941980	46	1	0.470643	PC4_Polycomb_/_Bivalent_stem_cell_Enh	587	0	12.45	11.7	13.33
chr1	941980	946076	48	1	-0.391724	E2_Multi-tissue	943	13	6.96	5.44	8.38
chr1	946076	950172	50	1	0.309977	TN1_Transcription	622	0	5.97	5.63	6.58
chr1	950172	954268	52	1	-0.216547	TN1_Transcription	856	0	8.26	7.63	8.7
chr1	954268	958364	54	1	-0.243171	TN1_Transcription	730	0	10.06	9.41	10.34
chr1	958364	962460	56	1	-0.127326	P_Promoter	415	0	23.92	19.47	28.49
chr1	962460	966556	58	1	-0.532577	TN4_Transcription	791	0	1.05	0.8	1.48
chr1	966556	970652	60	1	-0.731216	PC4_Polycomb_/_Bivalent_stem_cell_Enh	835	0	5.22	4.72	6.05
chr1	969228	973324	62	1	-0.243983	PC4_Polycomb_/_Bivalent_stem_cell_Enh	1120	0	2.55	1.62	3.26
chr1	973324	977420	64	1	-0.436837	PC4_Polycomb_/_Bivalent_stem_cell_Enh	3604	0	5.01	3.95	5.7
chr1	977420	981516	66	1	-0.264978	PC1_Polycomb_/_Heterochromatin	1778	0	2.82	2.62	2.99
chr1	981516	985612	68	1	0.302406	PC4_Polycomb_/_Bivalent_stem_cell_Enh	1596	0	3.33	2.79	4.12
chr1	996176	1000272	70	1	0.12017	PC4_Polycomb_/_Bivalent_stem_cell_Enh	805	0	13.99	13.41	14.46
chr1	1000272	1004368	72	1	0.0389347	E5_B-cell-like	1573	23	11.15	5.44	13.97
chr1	1004368	1008464	74	1	-0.000533598	E9_Liver_/_Intestine	1023	0	12.7	11.61	14.29
chr1	1006772	1010868	76	1	-0.0143475	L5_Low_signal	717	290	1.1	0.42	2.13
chr1	1011972	1016068	78	1	-0.62338	P_Promoter	507	0	48.05	42.1	50.46
chr1	1017140	1021236	80	1	0.340323	P_Promoter	738	0	12.85	11.17	15
chr1	1021236	1025332	82	1	0.355851	TN3_Transcription	3237	33	3.92	3.04	4.66
chr1	1025332	1029428	84	1	0.0366856	PC1_Polycomb_/_Heterochromatin	1194	33	4.11	3.86	4.55
chr1	1029428	1033524	86	1	0.0930087	E5_B-cell-like	321	0	6.4	5.27	8.15
chr1	1033524	1037620	88	1	-0.187746	PC4_Polycomb_/_Bivalent_stem_cell_Enh	333	0	7.42	7.25	7.94
chr1	1037620	1041716	90	1	0.0263484	E5_B-cell-like	137	0	15.82	14.87	17.92
chr1	1041716	1045812	92	1	-0.449803	TN1_Transcription	520	332	5.11	4.9	5.6
chr1	1045812	1049908	94	1	-0.0685813	TN4_Transcription	1161	56	3.91	3.17	5.22
chr1	1049908	1054004	96	1	0.134243	TN1_Transcription	1100	0	6.87	5.46	7.64
chr1	1054004	1058100	98	1	-0.0712554	TN4_Transcription	4902	0	1.42	0.77	2.01
chr1	1057572	1061668	100	1	0.120946	P_Promoter	336	0	42.5	39.79	44.8
chr1	1060828	1064924	102	1	-0.218541	E5_B-cell-like	1479	242	6.72	3.78	8.16
chr1	1064924	1069020	104	1	0.101045	PC4_Polycomb_/_Bivalent_stem_cell_Enh	1835	0	5	3.36	6.23
chr1	1069020	1073116	106	1	0.356158	L5_Low_signal	1045	215	4.23	3.22	5.37
chr1	1073116	1077212	108	1	-0.0450376	PC4_Polycomb_/_Bivalent_stem_cell_Enh	2122	0	7.71	6.99	8.22
chr1	1078128	1082224	110	1	0.382806	P_Promoter	1215	0	47.73	42.12	49.1
chr1	1082224	1086320	112	1	-0.0385207	TN4_Transcription	2239	57	2.27	1.81	3.3
chr1	1086320	1090416	114	1	-0.153265	PC1_Polycomb_/_Heterochromatin	1682	0	0.22	0.19	0.26
chr1	1090416	1094512	116	1	0.153844	PC1_Polycomb_/_Heterochromatin	880	0	2.43	2.16	2.71
chr1	1097272	1101368	118	1	-0.0243336	E11_T-cell	706	0	2.73	2.04	3.14
chr1	1107424	1111520	120	1	0.0445631	E9_Liver_/_Intestine	329	0	2.71	0.91	3.4
chr1	1111520	1115616	122	1	-0.0554841	TN1_Transcription	600	0	6.15	5.63	6.52
chr1	1113972	1118068	124	1	0.0340376	P_Promoter	409	0	62.89	60.54	65.29
chr1	1118604	1122700	126	1	0.0977393	PC2_Weak_Polycomb	5013	986	0.86	0.57	1.46
chr1	1122700	1126796	128	1	0.286611	E9_Liver_/_Intestine	50682	0	8.84	7	10.47
chr1	1126796	1130892	130	1	0.013313	E9_Liver_/_Intestine	1850	0	4.85	4.52	9.49
chr1	1130892	1134988	132	1	-0.31994	E9_Liver_/_Intestine	14101	809	7.32	2.17	8.5
chr1	1134988	1139084	134	1	0.0557666	P_Promoter	1187	0	21.87	18.78	24.77
chr1	1139084	1143180	136	1	0.0762872	PC1_Polycomb_/_Heterochromatin	153	0	0.18	0.17	0.22
chr1	1143180	1147276	138	1	-0.107496	E11_T-cell	726	316	7.75	4.69	9.45
chr1	1147276	1151372	140	1	0.100445	PC1_Polycomb_/_Heterochromatin	36223	4729	1.44	1.14	1.76
chr1	1151372	1155468	142	1	-0.264025	PC1_Polycomb_/_Heterochromatin	1236	0	2.33	2.1	2.5
chr1	1155468	1159564	144	1	-0.235992	P_Promoter	18766	0	25.38	20.95	26.39
chr1	1159564	1163660	146	1	0.609918	PC4_Polycomb_/_Bivalent_stem_cell_Enh	2002	0	4.48	3.91	5.04
chr1	1163660	1167756	148	1	-0.0174451	E9_Liver_/_Intestine	398	0	7.84	6.42	8.72
chr1	1167756	1171852	150	1	0.0653499	PC4_Polycomb_/_Bivalent_stem_cell_Enh	754	0	6.18	4.96	6.56
chr1	1171852	1175948	152	1	0.119117	PC4_Polycomb_/_Bivalent_stem_cell_Enh	3058	0	10.4	8.24	11.28
chr1	1175948	1180044	154	1	-0.806503	PC4_Polycomb_/_Bivalent_stem_cell_Enh	1548	880	3.71	3.02	4.02
chr1	1180044	1184140	156	1	0.0120989	PC4_Polycomb_/_Bivalent_stem_cell_Enh	575	0	2.81	2.37	4.19
chr1	1184140	1188236	158	1	0.0214238	E12_Erythroblast-like	1559	3	1.93	0.52	2.72
chr1	1195396	1199492	160	1	0.382286	PC1_Polycomb_/_Heterochromatin	434	0	0.64	0.48	0.83
chr1	1199492	1203588	162	1	0.0206768	P_Promoter	736	0	37.07	34.96	39.01
chr1	1203588	1207684	164	1	0.0026564	PC4_Polycomb_/_Bivalent_stem_cell_Enh	1296	0	9.19	8.37	9.61
chr1	1207684	1211780	166	1	-0.675485	PC4_Polycomb_/_Bivalent_stem_cell_Enh	4080	17	2.19	1.31	2.62
chr1	1211780	1215876	168	1	-0.637384	E5_B-cell-like	1568	0	9.41	7.02	11.15
chr1	1215876	1219972	170	1	0.585112	E6_Weak_epithelial	2152	1278	7.86	3.59	9.55
chr1	1219972	1224068	172	1	-0.780041	TN1_Transcription	70397	0	8.38	6.59	8.76
chr1	1224068	1228164	174	1	0.291393	TN1_Transcription	1942	0	6.87	6.5	8.4
chr1	1228164	1232260	176	1	-0.0487666	TN3_Transcription	27376	0	13.43	12.87	14.56
chr1	1232260	1236356	178	1	0.0784875	TN1_Transcription	1673	114	3.99	3.25	5.18
chr1	1236356	1240452	180	1	-0.222234	E9_Liver_/_Intestine	2854	144	9.19	7.65	12.51
chr1	1240452	1244548	182	1	0.177889	PC1_Polycomb_/_Heterochromatin	1400	25	2	1.8	2.27
chr1	1244548	1248644	184	1	-0.337954	PC4_Polycomb_/_Bivalent_stem_cell_Enh	1715	42	11.92	11.02	12.52
chr1	1245636	1249732	186	1	0.0417717	PC4_Polycomb_/_Bivalent_stem_cell_Enh	3997	0	9.27	8.37	9.73
chr1	1249732	1253828	188	1	0.127213	E5_B-cell-like	3377	1022	3.2	2.1	5.14
chr1	1253828	1257924	190	1	-0.279182	TN1_Transcription	631	0	8.75	8.46	9.09
chr1	1257924	1262020	192	1	-0.340272	TN1_Transcription	580	0	8.2	7.58	8.68
chr1	1262020	1266116	194	1	-0.353188	TN1_Transcription	448	0	6.37	4.58	6.89
chr1	1266116	1270212	196	1	-0.501498	TN4_Transcription	659	21	6.61	5.44	7.4
chr1	1270212	1274308	198	1	-0.50469	E2_Multi-tissue	400	0	12.28	11.59	12.74
chr1	1274308	1278404	200	1	-0.134816	HET1_Heterochromatin	847	122	2.55	0.62	2.92
chr1	1280224	1284320	202	1	0.00249864	E4_Multi-tissue	775	0	22.16	19.75	22.67
chr1	1284320	1288416	204	1	-0.0616899	PC1_Polycomb_/_Heterochromatin	1177	0	1.61	1.38	1.91
chr1	1289356	1293452	206	1	-0.016546	E4_Multi-tissue	1661	41	9.82	2.2	12.62
chr1	1293452	1297548	208	1	-0.0128761	TN1_Transcription	1428	0	6.69	5.55	7.52
chr1	1297548	1301644	210	1	-0.00235974	E3_Brain_/_Melanocyte	422	0	4.43	4.04	4.82
chr1	1301644	1305740	212	1	4.75e-05	E2_Multi-tissue	450	2	2.65	2.23	4.19
chr1	1305740	1309836	214	1	-0.0775913	P_Promoter	641	0	32.21	29.4	36.07
chr1	1309836	1313932	216	1	-0.0918153	TN1_Transcription	630	0	8.57	8.05	9.24
chr1	1313932	1318028	218	1	0.115535	TN3_Transcription	466	0	5.94	4.89	6.29
chr1	1318028	1322124	220	1	-0.00256948	TN1_Transcription	278	0	8.48	8.14	8.86
chr1	1322124	1326220	222	1	0.0156029	P_Promoter	250	0	8.95	7.37	12.63
chr1	1326220	1330316	224	1	-0.210423	TN1_Transcription	744	0	5.75	5.32	6.4
chr1	1330316	1334412	226	1	0.0032658	PC1_Polycomb_/_Heterochromatin	476	0	3.38	3.24	3.75
chr1	1334412	1338508	228	1	-0.0134323	TN4_Transcription	1562	0	2.81	2.24	3.44
chr1	1338508	1342604	230	1	0.452613	TN1_Transcription	820	0	9.07	7.9	9.38
chr1	1342604	1346700	232	1	0.0456278	E2_Multi-tissue	520	2	12.73	10.78	14.61
chr1	1346700	1350796	234	1	-0.0283637	P_Promoter	276	0	38.28	37.61	41.08
chr1	1350796	1354892	236	1	0.102147	PC4_Polycomb_/_Bivalent_stem_cell_Enh	519	0	5.66	4.63	6.57
chr1	1354892	1358988	238	1	0.167302	E2_Multi-tissue	197	8	6.86	5.73	7.47
chr1	1358988	1363084	240	1	0.0246886	E2_Multi-tissue	884	539	16.89	11.83	18.21
chr1	1369092	1373188	242	1	0.0806665	E11_T-cell	450	12	6.48	5.19	7.53
chr1	1373188	1377284	244	1	-0.443601	P_Promoter	639	0	57.94	54.27	65.73
chr1	1377284	1381380	246	1	-0.249894	TN4_Transcription	430	0	1.92	1.5	3.24
chr1	1381380	1385476	248	1	-0.153195	TN4_Transcription	224	0	1.69	1.23	2.01
chr1	1385476	1389572	250	1	-0.0122152	TN1_Transcription	534	0	10.92	10.62	11.13
chr1	1389572	1393668	252	1	-0.00675429	TN1_Transcription	98	0	8.39	8.17	8.57
chr1	1393668	1397764	254	1	-0.254166	TN1_Transcription	209	0	8.4	8	8.7
chr1	1397764	1401860	256	1	0.0135263	P_Promoter	484	0	61.52	59.25	62.51
chr1	1401860	1405956	258	1	0.0688592	TN1_Transcription	436	0	8.17	6.83	8.68
chr1	1405956	1410052	260	1	0.0854301	P_Promoter	551	0	51.69	50.63	53.33
chr1	1410052	1414148	262	1	0.0179532	PC1_Polycomb_/_Heterochromatin	267	54	6.35	5.96	6.62
chr1	1413972	1418068	264	1	0.00351609	PC1_Polycomb_/_Heterochromatin	187	0	4.38	4.06	4.68
chr1	1415684	1419780	266	1	-0.127547	E5_B-cell-like	320	0	13.7	10.7	14.49
chr1	1419780	1423876	268	1	-0.0952559	E6_Weak_epithelial	415	0	3.43	2.81	4.65
chr1	1423876	1427972	270	1	0.323201	E1_Stem_cell	2256	135	7.28	5.81	8.92
chr1	1427972	1432068	272	1	0.0348992	E2_Multi-tissue	337	0	5.48	4.2	7.07
chr1	1432068	1436164	274	1	0.00372205	E4_Multi-tissue	306	0	16.32	14.35	17.55
chr1	1436164	1440260	276	1	-0.042646	CTCF_CTCF-Cohesin	366	1	14.54	5	15.85
chr1	1440260	1444356	278	1	-0.113819	PC1_Polycomb_/_Heterochromatin	743	71	2.31	2.14	2.67
chr1	1458824	1462920	280	1	0.410934	TN4_Transcription	864	308	3.16	2.51	3.59
chr1	1462920	1467016	282	1	-0.0277858	E6_Weak_epithelial	301	2	1.93	1.04	3.2
chr1	1468984	1473080	284	1	-0.00542269	P_Promoter	360	0	32.1	28.95	36.12
chr1	1473080	1477176	286	1	-0.124885	TN4_Transcription	373	182	2.89	2.45	3.92
chr1	1477176	1481272	288	1	0.112095	TN1_Transcription	1014	0	8.11	7.68	9.29
chr1	1481272	1485368	290	1	-0.275623	TN1_Transcription	752	0	8.03	6.55	8.4
chr1	1485368	1489464	292	1	-0.0618126	TN4_Transcription	1335	5	0.72	0.3	1.36
chr1	1489464	1493560	294	1	0.141798	TN1_Transcription	548	0	10.16	9.7	10.39
chr1	1493560	1497656	296	1	0.122249	TN4_Transcription	2508	0	3.55	2.49	4.06
chr1	1504172	1508268	298	1	-0.054974	L5_Low_signal	490	54	6.04	5.15	6.25
chr1	1506572	1510668	300	1	-0.160805	PC1_Polycomb_/_Heterochromatin	1807	0	2.44	2.24	3.18
chr1	1508704	1512800	302	1	0.152723	L5_Low_signal	1583	0	8.97	7.68	9.65
chr1	1512800	1516896	304	1	0.257114	TN1_Transcription	592	2	3.23	2.58	3.68
chr1	1516896	1520992	306	1	-0.0865011	TN1_Transcription	817	0	6.15	5.9	6.46
chr1	1520992	1525088	308	1	0.0816475	TN4_Transcription	800	69	4.42	3.87	6.15
chr1	1525088	1529184	310	1	-0.286146	TN4_Transcription	1014	3	4.06	3.3	5.48
chr1	1529184	1533280	312	1	0.0383696	HET4_Heterochromatin	441	22	3.31	2.85	3.9
chr1	1533280	1537376	314	1	-0.113516	TN4_Transcription	1463	0	2.73	2.14	3.34
chr1	1537376	1541472	316	1	0.00798135	P_Promoter	254	0	9.61	8.24	10.65
chr1	1541472	1545568	318	1	0.0300922	TN4_Transcription	439	37	6.33	5.6	6.99
chr1	1545568	1549664	320	1	0.00139191	TN1_Transcription	1442	484	7.1	4.91	7.94
chr1	1549664	1553760	322	1	0.0931127	TN3_Transcription	429	208	5.44	5.1	5.8
chr1	1553760	1557856	324	1	0.128411	TN4_Transcription	350	0	4.04	2.46	4.49
chr1	1557856	1561952	326	1	-0.0116412	TN4_Transcription	608	0	3.81	3.05	4.54
chr1	1561952	1566048	328	1	-0.142492	TN1_Transcription	318	0	10.57	9.72	10.83
chr1	1566048	1570144	330	1	0.0327944	TN3_Transcription	499	69	8.43	7.64	9.16
chr1	1570144	1574240	332	1	-0.0566975	TN3_Transcription	260	0	1.45	1.17	1.65
chr1	1574240	1578336	334	1	-0.104323	E4_Multi-tissue	1060	0	9.87	9.29	11.69
chr1	1575472	1579568	336	1	0.0196324	PC1_Polycomb_/_Heterochromatin	17522	7	5.99	5.6	6.64
chr1	1581372	1585468	338	1	-0.0145168	PC1_Polycomb_/_Heterochromatin	1380	8	2.45	2.16	3.06
chr1	1594372	1598468	340	1	0.0552742	PC4_Polycomb_/_Bivalent_stem_cell_Enh	2437	0	4.47	3.97	4.76
chr1	1597276	1601372	342	1	0.434357	P_Promoter	491	0	19.21	16.63	24.43
chr1	1601372	1605468	344	1	-0.279301	E5_B-cell-like	364	18	4.48	1.96	5.73
chr1	1605468	1609564	346	1	-0.240526	E5_B-cell-like	311	0	15.35	12.41	16.04
chr1	1607932	1612028	348	1	-0.253703	E12_Erythroblast-like	537	13	1.96	1.01	2.76
chr1	1612028	1616124	350	1	-0.00210752	E5_B-cell-like	415	41	13.72	10.19	15.14
chr1	1616124	1620220	352	1	-0.0567733	TN1_Transcription	171	10	5.07	3.26	6.38
chr1	1620220	1624316	354	1	0.0262312	E2_Multi-tissue	794	47	3.3	1.04	5.43
chr1	1624316	1628412	356	1	0.0663524	TN4_Transcription	1120	0	2.79	2.26	3.24
chr1	1628412	1632508	358	1	0.210207	P_Promoter	190	10	29.27	25.94	30.13
chr1	1629773	1633869	360	1	0.00354226	PC4_Polycomb_/_Bivalent_stem_cell_Enh	114	0	12.99	12.53	13.85
chr1	1635490	1639586	362	1	-0.0175657	TN1_Transcription	269	0	7.92	7.51	8.87
chr1	1645291	1649387	364	1	-0.0385743	TN1_Transcription	112	0	3.27	3.05	4.51
chr1	1652402	1656498	366	1	0.615378	TN1_Transcription	188	0	7.21	6.77	7.71
chr1	1654602	1658698	368	1	-0.0152501	TN4_Transcription	135	48	6.21	5.74	6.56
chr1	1657991	1662087	370	1	-0.00924535	L5_Low_signal	278	5	5.95	4.91	7.1
chr1	1660892	1664988	372	1	0.00497461	E2_Multi-tissue	157	0	3.99	2.66	6.59
chr1	1662917	1667013	374	1	0.0375673	TN1_Transcription	235	0	5.81	5.5	6.34
chr1	1667013	1671109	376	1	0.683528	TN1_Transcription	724	0	3.24	2.84	4.1
chr1	1671109	1675205	378	1	-0.0358848	TN4_Transcription	390	11	2.89	2.04	3.6
chr1	1675669	1679765	380	1	-0.00688961	E5_B-cell-like	262	0	20.22	16.63	21.14
chr1	1679765	1683861	382	1	-0.111806	TN3_Transcription	778	0	1.51	1.35	2.12
chr1	1683861	1687957	384	1	-0.113414	E2_Multi-tissue	2119	0	6.86	6.46	8.41
chr1	1687957	1692053	386	1	0.0839104	TN4_Transcription	547	0	1.54	1.38	2.33
chr1	1691313	1695409	388	1	-0.00287863	P_Promoter	197	5	14.4	13.27	16.56
chr1	1703313	1707409	390	1	0.0464894	TN1_Transcription	279	0	6.7	6.35	7.08
chr1	1714465	1718561	392	1	0.0163936	TN1_Transcription	963	642	4.02	0.04	4.28
chr1	1718561	1722657	394	1	0.00892271	TN1_Transcription	232	0	7.02	6.54	7.9
chr1	1722213	1726309	396	1	-0.074413	P_Promoter	167	0	56.48	50.56	59.7
chr1	1723869	1727965	398	1	-0.0220879	L3_Low_signal	434	98	1.73	1.4	1.92
chr1	1727965	1732061	400	1	-0.0251657	TN1_Transcription	208	17	6.21	5.14	7.67
chr1	1732061	1736157	402	1	0.00117604	TN1_Transcription	298	0	5.03	4.51	5.84
chr1	1736157	1740253	404	1	-0.00921076	E5_B-cell-like	222	16	6.05	0.93	8.47
chr1	1739913	1744009	406	1	0.0101224	TN4_Transcription	312	16	2.47	2.01	3.03
chr1	1744513	1748609	408	1	-0.0208444	P_Promoter	50	0	22.18	21.49	22.85
chr1	1747313	1751409	410	1	0.00751798	PC1_Polycomb_/_Heterochromatin	516	10	3.18	2.76	3.68
chr1	1751485	1755581	412	1	-0.0364198	CTCF_CTCF-Cohesin	447	69	9.51	2.94	25
chr1	1755581	1759677	414	1	-0.640022	TN1_Transcription	1083	0	7.55	6.92	8.06
chr1	1759677	1763773	416	1	-0.205421	TN1_Transcription	862	0	7.06	6.16	7.33
chr1	1763773	1767869	418	1	0.0783521	TN4_Transcription	373	4	3.63	3.18	4.3
chr1	1767869	1771965	420	1	0.0100484	PC2_Weak_Polycomb	250	0	3.77	3.6	3.91
chr1	1771965	1776061	422	1	-0.195148	TN2_Transcription	726	0	3.45	3.21	3.93
chr1	1776061	1780157	424	1	0.0833826	P_Promoter	371	0	56.36	55.56	57.56
chr1	1780157	1784253	426	1	0.0582136	E9_Liver_/_Intestine	824	28	5.17	4.29	6.72
chr1	1784253	1788349	428	1	-0.0432203	TN1_Transcription	230	0	8.66	8.42	9.51
chr1	1788349	1792445	430	1	0.100737	TN1_Transcription	160	0	9.64	9.4	10.2
chr1	1792445	1796541	432	1	0.393368	TN1_Transcription	599	0	7.01	6.52	7.22
chr1	1796541	1800637	434	1	0.372346	TN1_Transcription	420	0	8.56	8.27	9.2
chr1	1800637	1804733	436	1	0.0832673	TN1_Transcription	579	43	5.49	4.61	5.87
chr1	1804733	1808829	438	1	0.0878441	TN1_Transcription	881	0	4.53	4.32	6.69
chr1	1808829	1812925	440	1	0.0810537	TN4_Transcription	234	0	3.1	2.68	3.94
chr1	1812925	1817021	442	1	-0.0157373	TN4_Transcription	329	0	3.54	3.13	4.15
chr1	1817021	1821117	444	1	-0.244052	TN1_Transcription	490	0	5.61	5.11	6.2
chr1	1821117	1825213	446	1	0.0244988	L3_Low_signal	199	33	2.05	1.75	2.32
chr1	1825213	1829309	448	1	0.0821019	E4_Multi-tissue	365	0	12.44	10.22	15.23
chr1	1829309	1833405	450	1	-0.182154	TN4_Transcription	301	0	2.74	2.51	3.51
chr1	1833405	1837501	452	1	0.0825198	E5_B-cell-like	404	110	7.79	5.59	9.89
chr1	1837501	1841597	454	1	-0.155946	TN3_Transcription	637	186	3.21	2.56	3.57
chr1	1841597	1845693	456	1	-0.546894	TN3_Transcription	1828	0	4.85	4.53	5.27
chr1	1845693	1849789	458	1	0.119111	E4_Multi-tissue	977	549	12.23	1.59	14.12
chr1	1849789	1853885	460	1	-0.00631952	TN3_Transcription	545	2	3.43	3.12	4.01
chr1	1853885	1857981	462	1	0.00540511	TN3_Transcription	638	156	5.05	4.52	6.25
chr1	1857981	1862077	464	1	0.0161627	E2_Multi-tissue	182	10	7.26	6.09	8.23
chr1	1862077	1866173	466	1	-0.229381	E5_B-cell-like	559	0	8.19	6.83	8.63
chr1	1866173	1870269	468	1	0.159879	TN3_Transcription	412	0	2.88	2.44	3.33
chr1	1870269	1874365	470	1	0.18232	TN3_Transcription	539	0	5.21	4.34	5.49
chr1	1874365	1878461	472	1	-0.0784123	E5_B-cell-like	363	6	9.2	4.26	9.58
chr1	1878461	1882557	474	1	0.688512	TN3_Transcription	1255	7	1.61	1.2	2
chr1	1882557	1886653	476	1	0.111692	TN3_Transcription	466	0	4.38	4.06	4.68
chr1	1886653	1890749	478	1	-0.0948665	TN3_Transcription	1409	0	10.5	9.41	11.46
chr1	1890749	1894845	480	1	-0.226256	TF3_FOXA1_/_AR_/_ESR1	391	0	11.24	7.91	12.04
chr1	1894845	1898941	482	1	-0.000534983	E12_Erythroblast-like	1070	368	4.9	3.88	5.44
chr1	1898941	1903037	484	1	0.167767	E11_T-cell	848	75	0.65	0.39	1.23
chr1	1904765	1908861	486	1	0.433796	E2_Multi-tissue	406	272	5.49	4.89	5.94
chr1	1908861	1912957	488	1	0.190723	PC1_Polycomb_/_Heterochromatin	790	0	3.02	2.81	3.23
chr1	1911521	1915617	490	1	-0.396325	L3_Low_signal	1151	236	0.14	0.12	0.18
chr1	1915617	1919713	492	1	-0.576299	PC4_Polycomb_/_Bivalent_stem_cell_Enh	999	0	3.13	2.78	3.71
chr1	1919713	1923809	494	1	-0.878463	PC1_Polycomb_/_Heterochromatin	806	801	1.03	0.99	1.12
chr1	1923809	1927905	496	1	0.666291	PC1_Polycomb_/_Heterochromatin	1001	75	2.7	2.43	2.84
chr1	1927905	1932001	498	1	-0.0523274	PC1_Polycomb_/_Heterochromatin	1093	0	2.45	2.14	2.95
chr1	1937865	1941961	500	1	-0.0820934	PC1_Polycomb_/_Heterochromatin	2101	0	2.25	1.81	2.49
chr1	1941961	1946057	502	1	0.177408	CTCF_CTCF-Cohesin	2619	0	15.68	13.06	16.35
chr1	1944813	1948909	504	1	-0.100918	E4_Multi-tissue	2215	157	7.44	3.5	8.8
chr1	1958113	1962209	506	1	0.126289	CTCF_CTCF-Cohesin	559	0	42.64	28.04	44.12
chr1	1967413	1971509	508	1	-0.132799	E4_Multi-tissue	6462	1507	1.83	1.35	2
chr1	1971565	1975661	510	1	0.271542	PC1_Polycomb_/_Heterochromatin	968	0	3.14	2.95	3.38
chr1	1975661	1979757	512	1	0.138014	E6_Weak_epithelial	1787	1036	3.48	2.21	6.67
chr1	1980665	1984761	514	1	0.212084	PC1_Polycomb_/_Heterochromatin	2350	5	2.65	2.43	2.92
chr1	1984761	1988857	516	1	-0.0685098	PC1_Polycomb_/_Heterochromatin	5527	28	3.32	3	3.92
chr1	1988013	1992109	518	1	0.0278402	E8_Weak_multi-tissue	679	14	5.43	4.3	7.36
chr1	1998165	2002261	520	1	-0.13644	PC2_Weak_Polycomb	2058	7	1.06	0.81	1.99
chr1	2002261	2006357	522	1	0.519897	PC4_Polycomb_/_Bivalent_stem_cell_Enh	1194	0	5.81	4.45	6.56
chr1	2012913	2017009	524	1	0.365969	E4_Multi-tissue	376	0	4.24	2.08	5.34
chr1	2016673	2020769	526	1	-0.171005	PC4_Polycomb_/_Bivalent_stem_cell_Enh	577	0	11.89	11.18	12.35
chr1	2020769	2024865	528	1	0.111614	PC3_Polycomb	962	222	3.81	3.59	4.02
chr1	2024865	2028961	530	1	-0.0651337	TN4_Transcription	772	0	0.96	0.8	1.22
chr1	2028961	2033057	532	1	-0.421077	PC3_Polycomb	1348	0	2.61	2.29	2.84
chr1	2033057	2037153	534	1	-0.348435	PC1_Polycomb_/_Heterochromatin	1161	838	2.26	2.19	2.86
chr1	2037153	2041249	536	1	-0.305005	PC3_Polycomb	1118	6	1.54	1.31	1.9
chr1	2038525	2042621	538	1	0.0690839	PC2_Weak_Polycomb	515	0	1.86	1.04	2.24
chr1	2042621	2046717	540	1	-0.0054844	P_Promoter	462	0	20.33	17.23	26.62
chr1	2046717	2050813	542	1	-0.423841	PC4_Polycomb_/_Bivalent_stem_cell_Enh	754	0	6.09	5.37	7.07
chr1	2050813	2054909	544	1	-0.012532	PC4_Polycomb_/_Bivalent_stem_cell_Enh	1186	13	3.66	3.26	5.57
chr1	2054909	2059005	546	1	0.358485	PC2_Weak_Polycomb	909	0	1.61	1.38	2.03
chr1	2059005	2063101	548	1	-0.632	TN4_Transcription	8980	0	3.01	2.62	3.81
chr1	2063101	2067197	550	1	-0.236427	HET1_Heterochromatin	835	0	2.73	1.86	3.74
chr1	2065237	2069333	552	1	-0.0151117	PC3_Polycomb	1649	0	1.64	1.46	2.04
chr1	2069333	2073429	554	1	0.199991	E9_Liver_/_Intestine	273	0	2.92	2.32	3.16

## Sheet: b
trait	type	sample size	proportion of case	Nsig	Nind	lambdaSNP	lambdaHFS
height	continuous	354072	NA	7573	1422	0.970582	0.753649
BMI	continuous	353708	NA	1482	387	0.804882	0.657047
BMD	continuous	205624	NA	1402	303	0.414095	0.543193
platelet	continuous	344284	NA	3102	619	0.67176	0.592315
intelligence	continuous	113441	NA	125	48	0.466088	0.538181
SBP	continuous	331497	NA	512	187	0.533585	0.566659
chronotype	continuous	316898	NA	240	76	0.578313	0.557171
insomnia	continuous	354592	NA	28	15	0.557961	0.514817
menarche	continuous	186261	NA	654	173	0.600759	0.552322
FVC	continuous	285641	NA	719	206	0.681845	0.589342
asthma	binary	350372	0.102976	355	80	0.52132	0.499852
rhinitis	binary	344258	0.204849	405	103	0.544623	0.5095
Nsig: number of loci that significantly associated with the trait. Nind: number of roughly independent loci associated with the trait. Lambda: genomic control inflation factor for HFS and SNP association tests.

## Sheet: c
trait	loci ID	ref_class	regression coefficient	p value	chr
BMD	323786	P_Promoter	-0.0216793	0	chr7
platelet	367624	P_Promoter	3.20192	2.79e-262	chr9
platelet	263274	E7_Monocyte_/_Macrophage	60.0709	8.97e-200	chr6
platelet	140050	E5_B-cell-like	8.13526	1.57e-198	chr3
height	660882	L4_Low_signal	-8.0029	8.77e-185	chr20
platelet	285496	PC3_Polycomb	-438.477	1.57e-174	chr6
height	158666	TN1_Transcription	-0.570197	1.14e-173	chr3
platelet	986140	L7_Low_signal	-124.203	9.38e-167	chr7
BMI	578904	E4_Multi-tissue	-0.196975	1.74e-155	chr16
height	839296	HET1_Heterochromatin	2.57836	4.15e-154	chr4
platelet	597470	TN2_Transcription	-10.2174	7.95e-139	chr17
height	620676	L3_Low_signal	4.38346	1.55e-132	chr18
height	297276	E1_Stem_cell	1.50743	6.1e-132	chr7
menarche	277336	P_Promoter	-0.106412	3.21e-130	chr6
height	316824	TN1_Transcription	-1.22014	3.09e-127	chr7
height	661068	TN2_Transcription	1.75707	3.39e-117	chr20
height	178340	L5_Low_signal	-1.27661	2.37e-112	chr4
height	660930	PC3_Polycomb	59.8887	2.95e-109	chr20
height	447444	E11_T-cell	2.82406	6.05e-108	chr11
height	79980	E8_Weak_multi-tissue	-17.0845	1.53e-107	chr2
height	255650	P_Promoter	-0.351947	6.7e-105	chr6
height	562792	TF1_NANOG_/_FOXA1	-4.66586	3.12e-103	chr15
BMD	283020	TF2_CEBPB	-0.213187	7.92e-103	chr6
height	202314	E8_Weak_multi-tissue	-1.58477	8.26e-102	chr4
platelet	356638	TN2_Transcription	28.3279	3.41e-100	chr8
height	447354	TN2_Transcription	-5.49795	2.12e-98	chr11
platelet	73096	TN4_Transcription	-63.7624	1.06e-97	chr2
height	1262916	E8_Weak_multi-tissue	9.19539	7.36e-96	chr20
asthma	262980	E5_B-cell-like	-0.0296203	1.5e-93	chr6
height	277336	P_Promoter	-0.256297	1.52e-93	chr6
height	263696	E2_Multi-tissue	-1.28552	1.13e-92	chr6
height	957550	L4_Low_signal	2.11716	1.31e-92	chr6
platelet	468108	L5_Low_signal	8.66502	3.24e-92	chr12
height	608440	TN1_Transcription	3.95405	3.74e-91	chr17
height	158716	TN2_Transcription	-2.25782	9.43e-90	chr3
height	1133276	HET3_Heterochromatin	24.0364	1.2e-89	chr12
height	303358	TN3_Transcription	3.47635	2.94e-88	chr7
platelet	1142526	L4_Low_signal	61.5035	3.02e-88	chr12
height	608386	TN2_Transcription	4.3197	4.57e-88	chr17
platelet	494704	P_Promoter	32.4237	4.52e-85	chr12
height	597992	TN4_Transcription	-6.37783	1.14e-82	chr17
BMD	989896	E4_Multi-tissue	0.0134382	2.53e-82	chr7
height	202386	L5_Low_signal	3.71321	9.65e-82	chr4
BMD	290602	E5_B-cell-like	-0.00875325	2.9e-79	chr6
height	263806	TN1_Transcription	1.75887	5.93e-79	chr6
BMD	79436	E8_Weak_multi-tissue	0.0469379	1.01e-78	chr2
platelet	367664	PC1_Polycomb_/_Heterochromatin	-15.3909	3.86e-78	chr9
BMD	969094	E8_Weak_multi-tissue	0.192695	1.64e-76	chr7
platelet	263214	TN1_Transcription	-18.3677	4.77e-76	chr6
height	251652	PC3_Polycomb	-10.5497	1.48e-75	chr5
height	608504	E5_B-cell-like	-1.09614	1.13e-74	chr17
height	1011062	L1_Low_signal	-42.4143	1.81e-74	chr8
platelet	227164	E2_Multi-tissue	7.75968	7.13e-74	chr5
platelet	494440	L4_Low_signal	10.0057	4.17e-70	chr12
platelet	285540	TN4_Transcription	4.67421	4.65e-70	chr6
platelet	431540	P_Promoter	-14.5339	4.75e-70	chr11
height	660668	TN1_Transcription	-5.8116	6.53e-70	chr20
height	283846	TN1_Transcription	-5.25701	1.74e-69	chr6
height	661144	TN4_Transcription	-3.10114	3.21e-69	chr20
height	1269792	L4_Low_signal	5.39093	3.88e-69	chr20
height	636436	TN4_Transcription	1.56029	5.35e-69	chr19
height	510566	E1_Stem_cell	-2.57942	9.37e-69	chr13
height	660588	TN2_Transcription	3.39696	1.58e-68	chr20
height	660830	TF1_NANOG_/_FOXA1	4.48278	1.71e-68	chr20
BMI	742950	L3_Low_signal	-2.82983	5.43e-68	chr2
platelet	498058	E7_Monocyte_/_Macrophage	67.7114	1.25e-67	chr12
asthma	931720	HET1_Heterochromatin	-0.497893	1.02e-66	chr6
height	489028	TN1_Transcription	1.32846	2.95e-66	chr12
BMI	1248602	HET3_Heterochromatin	-15.5568	5.7e-66	chr18
platelet	597430	CTCF_CTCF-Cohesin	-1.87757	3.4e-65	chr17
BMD	1116962	PC2_Weak_Polycomb	0.0953568	4.56e-65	chr11
height	1262892	L6_Low_signal	-9.68324	1.64e-64	chr20
menarche	1061800	HET3_Heterochromatin	-3.01154	5.17e-64	chr9
platelet	474480	E1_Stem_cell	-11.0207	3.2e-63	chr12
platelet	461058	TN4_Transcription	-23.8737	1.31e-62	chr11
platelet	260874	E3_Brain_/_Melanocyte	-25.2705	2.73e-61	chr6
height	261184	E4_Multi-tissue	-0.461912	3.66e-61	chr6
platelet	324348	E3_Brain_/_Melanocyte	-12.2563	1.16e-60	chr7
platelet	494988	TN1_Transcription	43.0376	7.46e-60	chr12
height	262602	TN3_Transcription	2.5776	1.03e-59	chr6
height	661010	PC1_Polycomb_/_Heterochromatin	3.46159	1.88e-59	chr20
height	1016252	L7_Low_signal	10.2731	1.98e-59	chr8
height	607648	E2_Multi-tissue	-0.373483	2.25e-58	chr17
platelet	229966	L6_Low_signal	-156.525	3.26e-58	chr5
platelet	497994	E4_Multi-tissue	2.94476	2.29e-57	chr12
height	1124746	TN2_Transcription	-0.86859	6.18e-57	chr12
height	597912	TN4_Transcription	1.98831	1.39e-56	chr17
height	660232	E2_Multi-tissue	5.6344	1.58e-56	chr20
height	70908	TN1_Transcription	3.74283	2.96e-56	chr2
platelet	495050	TN3_Transcription	301.524	6.39e-56	chr12
height	383088	PC4_Polycomb_/_Bivalent_stem_cell_Enh	-0.325388	1.24e-55	chr9
height	287656	E8_Weak_multi-tissue	1.60005	1.56e-55	chr6
platelet	480304	CTCF_CTCF-Cohesin	-7.98248	2.15e-55	chr12
platelet	931628	L1_Low_signal	152.137	3.25e-55	chr6
height	660730	PC1_Polycomb_/_Heterochromatin	1.37047	4.72e-55	chr20
BMD	323698	E2_Multi-tissue	0.0068319	8.73e-55	chr7
height	282958	E8_Weak_multi-tissue	-8.66338	1.09e-54	chr6
platelet	260930	PC3_Polycomb	-39.4827	3.58e-54	chr6
rhinitis	450910	E2_Multi-tissue	1.1926	9.23e-54	chr11
height	660514	TN1_Transcription	5.71996	1.27e-53	chr20
platelet	365946	TN1_Transcription	-9.36618	5.51e-53	chr8
height	263752	L3_Low_signal	12.6236	9.39e-53	chr6
height	189826	E9_Liver_/_Intestine	3.50974	1.18e-52	chr4
height	1124668	E10_Brain	5.89269	4.65e-52	chr12
height	931766	HET2_Heterochromatin	1.09249	1.01e-51	chr6
height	660440	E1_Stem_cell	-0.50489	1.24e-51	chr20
height	263554	P_Promoter	1.06908	1.89e-51	chr6
platelet	541554	CTCF_CTCF-Cohesin	1.14811	4.51e-51	chr14
height	855448	L5_Low_signal	0.174159	2.46e-50	chr4
height	202350	L5_Low_signal	2.36812	3.86e-50	chr4
height	302092	P_Promoter	0.130905	4.71e-50	chr7
platelet	480980	E6_Weak_epithelial	6.36323	6.07e-50	chr12
height	1179522	HET1_Heterochromatin	-4.3634	3.67e-49	chr14
height	510340	TN3_Transcription	-2.47195	1.41e-48	chr13
height	660148	L5_Low_signal	-0.836831	2.78e-48	chr20
height	660370	TN1_Transcription	-3.47703	3.4e-48	chr20
height	489080	TN3_Transcription	1.39986	2.53e-47	chr12
height	382770	E10_Brain	1.73957	4.64e-47	chr9
height	661244	L3_Low_signal	22.4194	1.43e-46	chr20
platelet	383024	E3_Brain_/_Melanocyte	-136.87	1.67e-46	chr9
height	665456	TN1_Transcription	1.3678	1.9e-46	chr20
BMD	323834	HET3_Heterochromatin	0.420389	1.91e-46	chr7
BMD	284804	E4_Multi-tissue	0.0148122	4.4e-46	chr6
height	660778	TN3_Transcription	0.506518	5.59e-46	chr20
height	660622	TN2_Transcription	2.34596	6.34e-46	chr20
height	70424	L3_Low_signal	2.22897	6.61e-46	chr2
height	217018	E2_Multi-tissue	0.393498	1.04e-45	chr5
platelet	1142620	PC3_Polycomb	14.6891	1.18e-45	chr12
height	563996	PC3_Polycomb	-9.38897	2.33e-45	chr15
platelet	474522	E5_B-cell-like	-9.49492	2.95e-45	chr12
height	165566	TN2_Transcription	0.677503	3.68e-45	chr3
height	290638	HET3_Heterochromatin	4.89941	4.13e-45	chr6
BMD	488048	E2_Multi-tissue	0.106209	8.04e-45	chr12
height	249850	E2_Multi-tissue	0.877471	2.36e-44	chr5
height	120632	TN4_Transcription	0.471422	6.47e-44	chr2
BMD	507848	E5_B-cell-like	-0.0418831	9.42e-44	chr13
platelet	668598	TN1_Transcription	13.0517	1.06e-43	chr20
rhinitis	181566	L6_Low_signal	1.0587	1.19e-43	chr4
height	900792	L4_Low_signal	-1.34966	2.5e-43	chr5
platelet	542276	TN3_Transcription	9.95291	3.88e-43	chr14
height	316782	TN2_Transcription	1.1246	4.34e-43	chr7
height	665498	TN1_Transcription	-3.65218	8.61e-43	chr20
platelet	647242	P_Promoter	4.18207	1.34e-42	chr19
height	660080	TN2_Transcription	-1.25551	1.6e-42	chr20
platelet	659430	E12_Erythroblast-like	28.1204	1.83e-42	chr20
height	620728	TN1_Transcription	1.26014	3.59e-42	chr18
height	943634	HET4_Heterochromatin	2.61508	3.94e-42	chr6
height	592348	E7_Monocyte_/_Macrophage	0.217962	3.96e-42	chr17
height	70682	TN1_Transcription	-0.847834	4.34e-42	chr2
BMD	528204	E11_T-cell	0.0181835	6.61e-42	chr14
height	264058	CTCF_CTCF-Cohesin	0.608965	7.94e-42	chr6
BMD	768768	PC4_Polycomb_/_Bivalent_stem_cell_Enh	0.0522604	8.33e-42	chr2
height	383020	TN3_Transcription	-1.12199	9.81e-42	chr9
platelet	263398	PC3_Polycomb	-43.955	1.06e-41	chr6
height	155480	TN1_Transcription	2.86609	1.2e-41	chr3
height	447016	E5_B-cell-like	0.634466	6.65e-41	chr11
height	498626	TN4_Transcription	1.22862	1.19e-40	chr12
BMI	1248562	HET2_Heterochromatin	-2.96712	1.2e-40	chr18
height	70378	E5_B-cell-like	0.485078	1.85e-40	chr2
height	538778	TF5_AR	-0.334385	2.19e-40	chr14
height	70638	TN4_Transcription	1.99872	2.81e-40	chr2
asthma	89968	E6_Weak_epithelial	-3.17552	4.73e-40	chr2
FVC	474284	TN3_Transcription	-0.402167	4.86e-40	chr12
platelet	480242	E5_B-cell-like	-29.6418	6.65e-40	chr12
height	665346	PC1_Polycomb_/_Heterochromatin	3.81154	8.01e-40	chr20
BMD	76042	PC1_Polycomb_/_Heterochromatin	-0.0727195	1.06e-39	chr2
platelet	602810	L4_Low_signal	32.2644	2.77e-39	chr17
asthma	450910	E2_Multi-tissue	1.32092	4.75e-39	chr11
height	221552	E6_Weak_epithelial	-1.03621	6.79e-39	chr5
height	626352	E8_Weak_multi-tissue	-0.699557	7.1e-39	chr18
height	70318	TN2_Transcription	0.674284	9.04e-39	chr2
height	634980	TN4_Transcription	-1.20374	9.08e-39	chr19
platelet	1180820	HET2_Heterochromatin	96.6826	9.77e-39	chr14
platelet	482708	P_Promoter	-2.06758	1.67e-38	chr12
platelet	263328	TN1_Transcription	-25.187	2.77e-38	chr6
height	1200918	E12_Erythroblast-like	0.192971	2.93e-38	chr15
height	273310	CTCF_CTCF-Cohesin	0.612712	3.49e-38	chr6
menarche	1061864	E8_Weak_multi-tissue	0.212998	3.52e-38	chr9
height	1029048	L1_Low_signal	-24.0069	4.86e-38	chr8
platelet	324296	PC2_Weak_Polycomb	9.48988	6.46e-38	chr7
height	388882	PC3_Polycomb	-5.90166	7.59e-38	chr9
platelet	543372	TN4_Transcription	-3.61362	8.41e-38	chr14
platelet	1192524	TN1_Transcription	-24.2358	1.16e-37	chr15
platelet	285400	TF2_CEBPB	138.323	1.17e-37	chr6
BMI	438940	E3_Brain_/_Melanocyte	-1.3349	1.22e-37	chr11
platelet	227064	PC2_Weak_Polycomb	-7.80553	1.38e-37	chr5
height	907622	TN2_Transcription	-0.449688	1.41e-37	chr5
platelet	597388	E2_Multi-tissue	5.20919	2.17e-37	chr17
platelet	532154	E10_Brain	10.4929	2.23e-37	chr14
height	382722	TN1_Transcription	1.29361	3.04e-37	chr9
platelet	620698	L5_Low_signal	-2.30206	3.06e-37	chr18
height	793190	TN2_Transcription	2.48189	3.18e-37	chr2
height	633724	TN4_Transcription	-1.63781	4.1e-37	chr19
height	443420	L3_Low_signal	-4.92045	4.64e-37	chr11
height	287742	E8_Weak_multi-tissue	5.05466	5.52e-37	chr6
height	498712	TN4_Transcription	-2.14586	1.47e-36	chr12
height	661298	TN2_Transcription	-5.68091	2.16e-36	chr20
height	261086	TN1_Transcription	2.368	2.44e-36	chr6
platelet	599446	L5_Low_signal	7.28872	2.75e-36	chr17
rhinitis	89968	E6_Weak_epithelial	-2.27134	3.53e-36	chr2
platelet	76606	TN1_Transcription	-12.8877	3.65e-36	chr2
height	262822	TN2_Transcription	5.22442	3.8e-36	chr6
platelet	93680	TN1_Transcription	3.94501	3.95e-36	chr2
height	216974	TF1_NANOG_/_FOXA1	-7.5563	4.71e-36	chr5
menarche	578904	E4_Multi-tissue	0.04364	5.28e-36	chr16
height	873666	E5_B-cell-like	-4.25614	5.88e-36	chr4
height	510452	PC3_Polycomb	4.49675	7.17e-36	chr13
height	873500	HET1_Heterochromatin	-0.759021	7.25e-36	chr4
SBP	564866	E5_B-cell-like	-0.507224	8.48e-36	chr15
platelet	804650	L4_Low_signal	-30.555	9.35e-36	chr3
height	273362	CTCF_CTCF-Cohesin	0.466487	1.67e-35	chr6
FVC	474334	E4_Multi-tissue	0.0887102	2.26e-35	chr12
height	273296	E1_Stem_cell	-11.5157	2.43e-35	chr6
asthma	600936	TN1_Transcription	-0.191686	2.76e-35	chr17
platelet	931516	PC2_Weak_Polycomb	-1.11756	2.93e-35	chr6
platelet	1229070	PC3_Polycomb	-15.249	3.13e-35	chr17
BMD	1097138	L4_Low_signal	0.0343045	3.17e-35	chr11
height	116644	TN4_Transcription	1.63267	3.25e-35	chr2
height	510500	E3_Brain_/_Melanocyte	-7.22259	3.82e-35	chr13
height	79948	E8_Weak_multi-tissue	-6.75056	5.08e-35	chr2
platelet	1142368	L4_Low_signal	10.0374	5.51e-35	chr12
height	803794	E5_B-cell-like	-0.114412	1.16e-34	chr3
BMD	542658	PC2_Weak_Polycomb	-0.0464026	1.61e-34	chr14
BMD	79496	E2_Multi-tissue	-0.0302861	1.68e-34	chr2
height	1124716	E8_Weak_multi-tissue	-8.39495	1.86e-34	chr12
height	958978	L3_Low_signal	5.64177	1.87e-34	chr6
height	70780	TN1_Transcription	2.71997	2.02e-34	chr2
height	194984	TN1_Transcription	0.484579	2.19e-34	chr4
BMD	590386	E2_Multi-tissue	0.0213103	3.61e-34	chr17
FVC	1229242	TF5_AR	-1.49375	4.34e-34	chr17
height	943728	E9_Liver_/_Intestine	2.94655	4.78e-34	chr6
BMD	93172	L1_Low_signal	-0.31498	5.12e-34	chr2
height	578816	P_Promoter	-0.839736	5.87e-34	chr16
height	263982	TN3_Transcription	-2.66555	6.55e-34	chr6
height	596518	P_Promoter	0.277211	7.97e-34	chr17
platelet	597340	TN2_Transcription	-2.90555	9.75e-34	chr17
platelet	76720	E1_Stem_cell	7.71967	1.23e-33	chr2
height	562750	E3_Brain_/_Melanocyte	-0.839028	2.19e-33	chr15
height	995902	PC2_Weak_Polycomb	-3.922	3.44e-33	chr7
height	70734	TN4_Transcription	-1.20974	4.35e-33	chr2
FVC	603296	PC1_Polycomb_/_Heterochromatin	-0.368624	4.38e-33	chr17
height	665402	TN3_Transcription	0.560926	5.6e-33	chr20
height	385428	TF5_AR	-1.9265	6.21e-33	chr9
height	645874	E6_Weak_epithelial	-0.144626	6.81e-33	chr19
height	1010998	PC2_Weak_Polycomb	1.59164	7.44e-33	chr8
height	803812	TN4_Transcription	-1.94288	7.67e-33	chr3
height	943686	HET4_Heterochromatin	-1.67893	7.83e-33	chr6
platelet	262882	E5_B-cell-like	0.659719	8.5e-33	chr6
FVC	1229182	TN4_Transcription	0.646826	1.12e-32	chr17
BMD	984374	TF4_OTX2	0.0239412	1.42e-32	chr7
BMI	934344	L2_Low_signal	35.5469	2.13e-32	chr6
height	116702	TN1_Transcription	2.32074	2.59e-32	chr2
height	498570	CTCF_CTCF-Cohesin	0.120507	2.75e-32	chr12
height	557950	E4_Multi-tissue	0.728931	3.64e-32	chr15
platelet	931550	HET1_Heterochromatin	23.1164	3.65e-32	chr6
height	238690	TN3_Transcription	2.19888	3.76e-32	chr5
height	862870	E3_Brain_/_Melanocyte	8.49628	4.48e-32	chr4
height	238842	E12_Erythroblast-like	-3.03991	4.6e-32	chr5
height	1064816	TF2_CEBPB	2.41996	5.36e-32	chr9
platelet	262792	PC1_Polycomb_/_Heterochromatin	45.3338	6.52e-32	chr6
height	931696	L4_Low_signal	-1.4271	9.46e-32	chr6
platelet	230020	TF1_NANOG_/_FOXA1	-47.1903	1.87e-31	chr5
platelet	931580	L7_Low_signal	-72.0669	1.95e-31	chr6
platelet	639034	E4_Multi-tissue	1.8128	2.15e-31	chr19
platelet	445186	TN4_Transcription	-5.28442	2.59e-31	chr11
height	608332	TN2_Transcription	-3.88126	2.77e-31	chr17
platelet	542504	PC1_Polycomb_/_Heterochromatin	-15.0023	3.41e-31	chr14
platelet	367756	L4_Low_signal	29.6633	3.7e-31	chr9
platelet	555292	E2_Multi-tissue	-24.8693	4.46e-31	chr15
height	559498	E2_Multi-tissue	0.672223	5.01e-31	chr15
FVC	474258	TN3_Transcription	-0.284048	5.33e-31	chr12
asthma	600894	E9_Liver_/_Intestine	1.38767	6.36e-31	chr17
height	469748	E5_B-cell-like	-0.292159	7.24e-31	chr12
height	1198056	PC2_Weak_Polycomb	-6.06337	8.83e-31	chr15
BMI	1248660	HET3_Heterochromatin	-13.8034	1.32e-30	chr18
height	301226	E8_Weak_multi-tissue	-1.39806	1.89e-30	chr7
platelet	590368	TN1_Transcription	2.74275	1.92e-30	chr17
platelet	308268	E5_B-cell-like	-0.518584	2.28e-30	chr7
BMI	846930	TF1_NANOG_/_FOXA1	1.61286	3.14e-30	chr4
BMD	1110412	TN3_Transcription	0.014381	3.14e-30	chr11
platelet	212034	PC2_Weak_Polycomb	-17.4384	3.71e-30	chr5
rhinitis	867222	TN2_Transcription	-1.07734	3.72e-30	chr4
platelet	383568	TN3_Transcription	98.3012	4.36e-30	chr9
rhinitis	931696	L4_Low_signal	-0.552413	4.43e-30	chr6
height	251726	TN3_Transcription	-2.02134	4.6e-30	chr5
SBP	217018	E2_Multi-tissue	-0.952498	4.97e-30	chr5
platelet	242358	TN3_Transcription	9.44236	6.46e-30	chr5
rhinitis	913670	HET2_Heterochromatin	-4.50581	6.99e-30	chr5
FVC	1229214	E1_Stem_cell	-0.0863709	9.18e-30	chr17
BMI	70756	E2_Multi-tissue	1.73965	1.12e-29	chr2
height	316904	E5_B-cell-like	0.266309	1.29e-29	chr7
height	365944	TN1_Transcription	0.511927	1.31e-29	chr8
height	363722	HET1_Heterochromatin	-0.804534	1.32e-29	chr8
FVC	603478	E4_Multi-tissue	-0.0105894	1.46e-29	chr17
height	750398	PC3_Polycomb	-7.39881	1.66e-29	chr2
height	168998	TN1_Transcription	4.54815	1.66e-29	chr3
FVC	862930	PC2_Weak_Polycomb	-1.13219	1.88e-29	chr4
BMD	956200	E1_Stem_cell	-0.153293	1.99e-29	chr6
platelet	247650	P_Promoter	1.11391	2.17e-29	chr5
platelet	804488	PC3_Polycomb	63.4809	2.32e-29	chr3
platelet	139984	TN4_Transcription	18.8788	2.51e-29	chr3
height	542628	TN3_Transcription	5.16255	3.6e-29	chr14
BMD	619750	TN2_Transcription	-0.0292297	3.66e-29	chr18
height	1248602	HET3_Heterochromatin	-13.581	5.14e-29	chr18
BMI	137966	PC4_Polycomb_/_Bivalent_stem_cell_Enh	2.34875	5.66e-29	chr3
platelet	494628	TN1_Transcription	55.3832	5.7e-29	chr12
rhinitis	913600	L2_Low_signal	22.0828	5.75e-29	chr5
height	665296	E5_B-cell-like	0.608219	7.48e-29	chr20
BMD	958870	L6_Low_signal	-0.181047	8.95e-29	chr6
asthma	1032306	HET3_Heterochromatin	6.87809	8.99e-29	chr9
height	896560	HET3_Heterochromatin	-2.83875	9.86e-29	chr5
height	913102	L5_Low_signal	2.11556	1.31e-28	chr5
height	538830	TN1_Transcription	-0.787618	1.32e-28	chr14
height	185452	E2_Multi-tissue	-0.184971	1.52e-28	chr4
platelet	263084	L1_Low_signal	42.6682	2.07e-28	chr6
height	116846	E9_Liver_/_Intestine	-0.305812	2.12e-28	chr2
platelet	520764	PC4_Polycomb_/_Bivalent_stem_cell_Enh	-3.6698	2.34e-28	chr13
menarche	787534	L1_Low_signal	-6.20481	2.82e-28	chr2
height	443304	L3_Low_signal	2.96757	3.22e-28	chr11
height	957490	HET3_Heterochromatin	8.27454	3.35e-28	chr6
height	262484	E11_T-cell	0.200647	4.02e-28	chr6
height	931614	PC2_Weak_Polycomb	0.860571	4.34e-28	chr6
BMD	802642	HET4_Heterochromatin	0.0591067	4.38e-28	chr3
BMD	602486	E4_Multi-tissue	0.0457085	4.51e-28	chr17
asthma	1032244	L7_Low_signal	-21.8441	4.59e-28	chr9
height	120376	P_Promoter	-0.188062	4.75e-28	chr2
menarche	1118040	L5_Low_signal	-0.197349	4.92e-28	chr11
height	157412	TN1_Transcription	-0.830887	5.02e-28	chr3
height	157338	HET4_Heterochromatin	0.911123	5.67e-28	chr3
BMD	284784	E8_Weak_multi-tissue	-0.0449888	6.21e-28	chr6
height	248978	PC1_Polycomb_/_Heterochromatin	-3.49301	6.33e-28	chr5
platelet	285442	TN1_Transcription	-6.66383	6.8e-28	chr6
height	1011102	L7_Low_signal	-3.57135	7.14e-28	chr8
SBP	487894	TN2_Transcription	-4.18905	8.43e-28	chr12
height	838450	PC3_Polycomb	-5.50927	8.5e-28	chr4
platelet	549542	E5_B-cell-like	-1.76234	9.46e-28	chr15
platelet	262070	E5_B-cell-like	-0.75441	1.01e-27	chr6
height	942098	L6_Low_signal	1.99203	1.24e-27	chr6
BMD	607486	TN2_Transcription	0.05278	1.44e-27	chr17
FVC	1229460	TN2_Transcription	-2.59142	1.44e-27	chr17
height	169064	E2_Multi-tissue	4.18838	1.62e-27	chr3
height	249746	PC3_Polycomb	6.70056	1.65e-27	chr5
menarche	1246132	TF4_OTX2	0.275483	1.79e-27	chr18
height	284126	TN3_Transcription	0.730217	2.19e-27	chr6
platelet	549576	L5_Low_signal	42.1897	2.21e-27	chr15
asthma	239054	TN2_Transcription	-0.243309	2.79e-27	chr5
height	138260	E6_Weak_epithelial	-3.34058	2.98e-27	chr3
height	103592	E12_Erythroblast-like	0.419749	3.17e-27	chr2
height	562854	PC3_Polycomb	1.51231	3.22e-27	chr15
height	534608	PC4_Polycomb_/_Bivalent_stem_cell_Enh	-1.42695	3.98e-27	chr14
FVC	603204	L3_Low_signal	0.924885	4.53e-27	chr17
platelet	434086	E4_Multi-tissue	3.84013	4.81e-27	chr11
height	262662	TN1_Transcription	0.853156	5.15e-27	chr6
platelet	482666	E1_Stem_cell	12.0427	6.1e-27	chr12
platelet	168470	L3_Low_signal	-26.7376	6.16e-27	chr3
BMD	447854	TN3_Transcription	-0.0174633	6.77e-27	chr11
rhinitis	931828	HET2_Heterochromatin	0.799218	7.01e-27	chr6
SBP	216972	PC4_Polycomb_/_Bivalent_stem_cell_Enh	3.76746	7.19e-27	chr5
height	510428	E11_T-cell	-0.424636	8.78e-27	chr13
height	1229696	E11_T-cell	3.21208	1.1e-26	chr17
height	262922	TN1_Transcription	-0.44457	1.23e-26	chr6
platelet	297250	CTCF_CTCF-Cohesin	0.75686	1.27e-26	chr7
height	252730	TN1_Transcription	-0.356095	1.38e-26	chr5
BMI	70824	E3_Brain_/_Melanocyte	-0.634511	1.57e-26	chr2
FVC	1124746	TN2_Transcription	-0.107251	1.65e-26	chr12
height	116758	L4_Low_signal	-5.90905	1.68e-26	chr2
BMD	655622	L1_Low_signal	0.316982	1.87e-26	chr20
BMI	137794	TN2_Transcription	-0.569618	1.91e-26	chr3
height	263916	TN1_Transcription	-0.5371	2e-26	chr6
height	626386	L5_Low_signal	-0.25737	2.06e-26	chr18
height	1179460	PC2_Weak_Polycomb	1.07572	2.19e-26	chr14
height	262174	E7_Monocyte_/_Macrophage	-0.398561	2.45e-26	chr6
platelet	931568	PC3_Polycomb	20.715	2.46e-26	chr6
platelet	71836	PC1_Polycomb_/_Heterochromatin	-14.6435	2.67e-26	chr2
height	807438	L3_Low_signal	5.03532	2.68e-26	chr3
height	84276	TN1_Transcription	2.00435	2.77e-26	chr2
height	380264	E1_Stem_cell	-0.538956	2.79e-26	chr9
platelet	371700	PC4_Polycomb_/_Bivalent_stem_cell_Enh	-64.9004	2.96e-26	chr9
platelet	71782	TN4_Transcription	-8.5152	3.44e-26	chr2
platelet	323022	TN3_Transcription	8.26005	3.8e-26	chr7
SBP	189654	TN2_Transcription	-14.1982	5.58e-26	chr4
height	931562	PC1_Polycomb_/_Heterochromatin	-1.39105	5.72e-26	chr6
platelet	591528	PC4_Polycomb_/_Bivalent_stem_cell_Enh	3.98496	5.74e-26	chr17
BMD	447798	TN1_Transcription	0.0226035	5.91e-26	chr11
height	73772	E4_Multi-tissue	-1.71572	6.9e-26	chr2
menarche	742950	L3_Low_signal	0.802385	7.18e-26	chr2
BMD	334784	E1_Stem_cell	0.0159245	7.91e-26	chr8
BMI	226866	TN2_Transcription	0.537507	9.94e-26	chr5
platelet	262330	E2_Multi-tissue	-2.56259	1.01e-25	chr6
height	559580	E2_Multi-tissue	-4.0019	1.24e-25	chr15
height	838318	L4_Low_signal	1.13865	1.3e-25	chr4
platelet	463442	PC3_Polycomb	38.3594	1.31e-25	chr11
height	1215300	HET1_Heterochromatin	-1.87465	1.96e-25	chr16
SBP	320844	E2_Multi-tissue	2.16079	2.19e-25	chr7
platelet	575866	E4_Multi-tissue	-4.72109	2.54e-25	chr16
SBP	780214	TF1_NANOG_/_FOXA1	4.16019	2.76e-25	chr2
height	138200	PC4_Polycomb_/_Bivalent_stem_cell_Enh	-1.48742	2.8e-25	chr3
height	1197866	L5_Low_signal	0.488952	3.21e-25	chr15
height	1003330	E6_Weak_epithelial	-0.309019	3.73e-25	chr8
BMD	655514	E1_Stem_cell	-0.0434875	3.9e-25	chr20
rhinitis	217860	E11_T-cell	0.416623	3.92e-25	chr5
FVC	670172	TN1_Transcription	-0.0735416	4.21e-25	chr20
height	930796	L2_Low_signal	-52.6016	4.35e-25	chr6
platelet	599396	TN4_Transcription	15.1765	4.74e-25	chr17
BMD	1232084	HET1_Heterochromatin	0.190514	4.76e-25	chr17
height	66862	CTCF_CTCF-Cohesin	1.55718	4.85e-25	chr2
BMI	576226	TN4_Transcription	-0.270598	5.39e-25	chr16
BMD	1101916	TN2_Transcription	-0.00907059	5.44e-25	chr11
BMD	334522	E6_Weak_epithelial	-0.0286947	5.57e-25	chr8
height	358864	L3_Low_signal	12.162	5.78e-25	chr8
BMD	478204	PC4_Polycomb_/_Bivalent_stem_cell_Enh	0.0635122	5.85e-25	chr12
height	626282	E3_Brain_/_Melanocyte	1.35766	6.57e-25	chr18
BMI	1206352	PC1_Polycomb_/_Heterochromatin	-2.89589	6.75e-25	chr16
platelet	93600	TF2_CEBPB	29.3931	7.21e-25	chr2
height	857096	L1_Low_signal	32.0084	7.72e-25	chr4
height	597882	E12_Erythroblast-like	1.06337	8.3e-25	chr17
rhinitis	571262	E2_Multi-tissue	0.105266	8.54e-25	chr16
height	282978	E1_Stem_cell	0.230621	9.71e-25	chr6
platelet	466052	P_Promoter	0.395347	9.98e-25	chr12
platelet	203922	E2_Multi-tissue	3.62261	1.02e-24	chr4
height	474342	E8_Weak_multi-tissue	-0.666146	1.03e-24	chr12
platelet	863844	PC1_Polycomb_/_Heterochromatin	21.8486	1.29e-24	chr4
height	383160	L5_Low_signal	0.162902	1.29e-24	chr9
rhinitis	867270	TN2_Transcription	0.596038	1.35e-24	chr4
height	273344	HET4_Heterochromatin	1.97167	1.46e-24	chr6
platelet	532232	E3_Brain_/_Melanocyte	-33.5303	1.49e-24	chr14
platelet	532098	TN2_Transcription	-9.8288	1.58e-24	chr14
height	1141336	HET2_Heterochromatin	-1.39361	1.58e-24	chr12
height	124238	P_Promoter	-0.11587	1.71e-24	chr2
BMI	647434	PC4_Polycomb_/_Bivalent_stem_cell_Enh	0.442448	1.8e-24	chr19
height	1061826	E2_Multi-tissue	3.09503	1.88e-24	chr9
platelet	318890	E7_Monocyte_/_Macrophage	5.46459	1.93e-24	chr7
platelet	933218	TF2_CEBPB	-5.36026	2.08e-24	chr6
platelet	463918	TN1_Transcription	17.0319	2.12e-24	chr11
height	1197772	L5_Low_signal	0.483256	2.15e-24	chr15
BMD	334644	E2_Multi-tissue	0.0336815	2.17e-24	chr8
height	168934	TF3_FOXA1_/_AR_/_ESR1	-1.986	2.2e-24	chr3
platelet	153134	TN4_Transcription	14.9947	2.27e-24	chr3
height	943792	L7_Low_signal	7.0898	2.55e-24	chr6
height	640498	TN1_Transcription	0.751941	2.55e-24	chr19
platelet	297302	TN3_Transcription	3.83126	2.59e-24	chr7
BMD	173492	E5_B-cell-like	0.00921345	2.78e-24	chr4
height	141264	E11_T-cell	0.217118	2.79e-24	chr3
height	597814	E8_Weak_multi-tissue	-0.80517	2.9e-24	chr17
platelet	71890	TN1_Transcription	5.69849	2.97e-24	chr2
rhinitis	89884	E7_Monocyte_/_Macrophage	-0.369025	3.64e-24	chr2
BMI	438914	E8_Weak_multi-tissue	2.46305	4.02e-24	chr11
platelet	588738	PC1_Polycomb_/_Heterochromatin	8.43346	4.12e-24	chr16
platelet	789330	E9_Liver_/_Intestine	5.00957	4.15e-24	chr2
height	472168	TN2_Transcription	-0.600699	5.79e-24	chr12
height	261842	L4_Low_signal	-1.18578	5.79e-24	chr6
platelet	383064	PC4_Polycomb_/_Bivalent_stem_cell_Enh	17.7025	6.56e-24	chr9
platelet	640616	TN3_Transcription	-15.4153	6.57e-24	chr19
BMI	137884	TN4_Transcription	-0.326859	7.05e-24	chr3
height	118204	E1_Stem_cell	4.8967	7.31e-24	chr2
height	280940	E6_Weak_epithelial	-0.196439	7.47e-24	chr6
menarche	387084	E5_B-cell-like	0.357788	7.73e-24	chr9
BMD	752648	E3_Brain_/_Melanocyte	-0.0721049	8.07e-24	chr2
platelet	495122	E1_Stem_cell	17.8031	8.22e-24	chr12
height	303524	E3_Brain_/_Melanocyte	0.831798	9.27e-24	chr7
platelet	934804	L7_Low_signal	-276.393	1.01e-23	chr6
height	295378	PC1_Polycomb_/_Heterochromatin	-1.27134	1.22e-23	chr6
platelet	931716	E6_Weak_epithelial	5.08498	1.24e-23	chr6
FVC	1229360	TN3_Transcription	1.45654	1.31e-23	chr17
BMD	317892	P_Promoter	0.00657603	1.53e-23	chr7
BMD	334740	PC1_Polycomb_/_Heterochromatin	-0.0655716	1.66e-23	chr8
height	138368	TN1_Transcription	7.30474	1.91e-23	chr3
BMI	478526	TF2_CEBPB	-8.62713	1.96e-23	chr12
BMD	267554	E5_B-cell-like	0.00289825	1.98e-23	chr6
height	362256	L1_Low_signal	15.6613	2.13e-23	chr8
menarche	111064	L1_Low_signal	-5.33514	2.38e-23	chr2
height	522596	P_Promoter	0.0591673	2.75e-23	chr14
platelet	82594	P_Promoter	2.28076	2.84e-23	chr2
height	931926	HET4_Heterochromatin	0.729263	3.04e-23	chr6
height	674392	PC3_Polycomb	2.56607	3.17e-23	chr21
platelet	83690	TN3_Transcription	-16.9633	3.6e-23	chr2
rhinitis	124332	TN4_Transcription	-1.24896	3.77e-23	chr2
platelet	519606	E9_Liver_/_Intestine	7.72406	4.39e-23	chr13
height	157522	TN3_Transcription	0.650668	4.41e-23	chr3
height	262148	E4_Multi-tissue	-0.485359	4.55e-23	chr6
height	382294	P_Promoter	0.20386	4.8e-23	chr9
platelet	1142444	L5_Low_signal	-7.04761	5.48e-23	chr12
height	1231610	E6_Weak_epithelial	0.632185	5.6e-23	chr17
platelet	797030	E12_Erythroblast-like	4.87492	6e-23	chr3
height	498268	E7_Monocyte_/_Macrophage	-0.478715	6.86e-23	chr12
BMD	282992	E6_Weak_epithelial	-0.0049514	7.75e-23	chr6
height	169716	TN1_Transcription	-3.65451	7.9e-23	chr3
rhinitis	198424	TN2_Transcription	-0.671792	8.38e-23	chr4
BMD	590436	TN2_Transcription	0.0295074	8.59e-23	chr17
asthma	89880	E2_Multi-tissue	0.482688	9.49e-23	chr2
platelet	175542	TN3_Transcription	25.536	9.71e-23	chr4
platelet	494862	HET4_Heterochromatin	-65.7428	1.07e-22	chr12
platelet	907618	TF1_NANOG_/_FOXA1	-13.8066	1.16e-22	chr5
height	137522	TN4_Transcription	1.61949	1.21e-22	chr3
height	136790	E1_Stem_cell	-1.06159	1.21e-22	chr3
height	661578	E6_Weak_epithelial	2.75488	1.26e-22	chr20
height	116892	TN1_Transcription	2.64018	1.34e-22	chr2
BMI	576278	E2_Multi-tissue	-0.470389	1.39e-22	chr16
platelet	308310	TN3_Transcription	6.28012	1.62e-22	chr7
height	918688	PC3_Polycomb	-6.30416	1.78e-22	chr5
platelet	549364	TN3_Transcription	-18.8225	1.9e-22	chr15
platelet	477830	E2_Multi-tissue	-7.99053	1.95e-22	chr12
platelet	380460	HET4_Heterochromatin	-7.18306	2.04e-22	chr9
height	957532	TF1_NANOG_/_FOXA1	-2.5729	2.13e-22	chr6
height	262556	HET1_Heterochromatin	0.175337	2.23e-22	chr6
height	803618	L4_Low_signal	-6.03974	2.36e-22	chr3
height	604418	TN3_Transcription	2.03979	2.46e-22	chr17
BMI	575838	E7_Monocyte_/_Macrophage	-0.38606	2.73e-22	chr16
platelet	227670	TN3_Transcription	-3.47575	2.81e-22	chr5
platelet	262636	TN4_Transcription	27.4364	2.81e-22	chr6
platelet	797632	L6_Low_signal	-73.8915	3.41e-22	chr3
asthma	368112	HET3_Heterochromatin	1.01635	3.55e-22	chr9
chronotype	123024	E7_Monocyte_/_Macrophage	-0.102665	4.1e-22	chr2
menarche	111080	E8_Weak_multi-tissue	1.43386	4.56e-22	chr2
height	635038	TN4_Transcription	0.570471	4.7e-22	chr19
height	382584	E12_Erythroblast-like	-0.234509	5.06e-22	chr9
platelet	239002	E11_T-cell	-8.16214	5.39e-22	chr5
height	446908	TN1_Transcription	-4.00842	5.74e-22	chr11
platelet	116566	E9_Liver_/_Intestine	3.52665	5.76e-22	chr2
height	637674	P_Promoter	0.247348	7.88e-22	chr19
height	272616	TN4_Transcription	-0.639768	8.4e-22	chr6
height	637090	TN1_Transcription	0.188006	8.76e-22	chr19
height	382484	TN1_Transcription	-1.82697	8.92e-22	chr9
height	603078	PC2_Weak_Polycomb	-3.37764	9.55e-22	chr17
BMI	443460	TN4_Transcription	-0.268798	9.58e-22	chr11
height	157452	TN2_Transcription	-1.45285	1.23e-21	chr3
height	914656	L7_Low_signal	31.3187	1.24e-21	chr5
height	173778	PC4_Polycomb_/_Bivalent_stem_cell_Enh	0.718999	1.27e-21	chr4
platelet	168376	E4_Multi-tissue	1.13942	1.27e-21	chr3
height	793156	PC1_Polycomb_/_Heterochromatin	-1.84294	1.35e-21	chr2
platelet	140548	L4_Low_signal	8.35508	1.37e-21	chr3
height	361846	PC3_Polycomb	-16.6052	1.41e-21	chr8
height	447814	PC1_Polycomb_/_Heterochromatin	0.871063	1.41e-21	chr11
height	162664	E5_B-cell-like	0.225914	1.42e-21	chr3
height	363622	PC3_Polycomb	-3.44988	1.46e-21	chr8
BMD	768602	L1_Low_signal	0.268391	1.47e-21	chr2
rhinitis	66098	E5_B-cell-like	0.0627747	1.48e-21	chr2
platelet	319016	TF3_FOXA1_/_AR_/_ESR1	7.84854	1.52e-21	chr7
height	568812	TN1_Transcription	0.309507	1.56e-21	chr16
platelet	498712	TN4_Transcription	15.1288	1.57e-21	chr12
FVC	660882	L4_Low_signal	-0.484787	1.58e-21	chr20
height	87546	PC1_Polycomb_/_Heterochromatin	-1.42504	1.87e-21	chr2
platelet	804510	TN2_Transcription	-5.264	2.07e-21	chr3
BMD	1000752	HET3_Heterochromatin	-0.185317	2.13e-21	chr8
platelet	269260	E9_Liver_/_Intestine	13.7421	2.22e-21	chr6
platelet	262694	TN4_Transcription	-39.2721	2.25e-21	chr6
height	531430	TN3_Transcription	0.768813	2.35e-21	chr14
height	917852	E3_Brain_/_Melanocyte	6.8848	2.41e-21	chr5
height	823688	TF1_NANOG_/_FOXA1	2.81158	2.45e-21	chr3
height	138500	E7_Monocyte_/_Macrophage	-7.57668	2.53e-21	chr3
height	298912	E5_B-cell-like	-0.260863	2.62e-21	chr7
platelet	597518	TN4_Transcription	5.41891	2.75e-21	chr17
BMD	633268	E4_Multi-tissue	-0.012192	2.78e-21	chr19
platelet	951280	TN2_Transcription	-2.05824	2.84e-21	chr6
menarche	277380	E2_Multi-tissue	-0.413993	2.84e-21	chr6
BMI	263712	TN2_Transcription	-0.540977	3.01e-21	chr6
height	1229122	PC1_Polycomb_/_Heterochromatin	4.93333	3.27e-21	chr17
height	338624	E8_Weak_multi-tissue	-0.882054	3.33e-21	chr8
height	435548	E1_Stem_cell	0.861233	3.77e-21	chr11
height	1269710	L3_Low_signal	-18.6416	4e-21	chr20
height	750700	TF4_OTX2	0.450293	4.94e-21	chr2
asthma	931688	PC2_Weak_Polycomb	-0.646666	5.13e-21	chr6
height	563274	TN2_Transcription	-0.4163	5.48e-21	chr15
height	1026160	L1_Low_signal	-22.2797	6.74e-21	chr8
height	236636	TN1_Transcription	-0.452304	8.73e-21	chr5
rhinitis	931634	HET2_Heterochromatin	-2.27143	9.18e-21	chr6
asthma	262852	E3_Brain_/_Melanocyte	0.604138	9.61e-21	chr6
height	930630	E6_Weak_epithelial	1.22286	9.73e-21	chr6
height	395796	TN1_Transcription	-1.98418	9.91e-21	chr9
menarche	582898	TN2_Transcription	0.175756	1.16e-20	chr16
FVC	261666	TN4_Transcription	-0.241727	1.2e-20	chr6
height	156974	TN4_Transcription	-0.53683	1.24e-20	chr3
height	597702	TN3_Transcription	-1.823	1.25e-20	chr17
platelet	591468	L5_Low_signal	-11.2702	1.34e-20	chr17
platelet	262022	E2_Multi-tissue	-0.437321	1.4e-20	chr6
height	278886	TN1_Transcription	1.00399	1.4e-20	chr6
height	568032	P_Promoter	0.184086	1.47e-20	chr16
platelet	931788	E5_B-cell-like	2.44447	1.63e-20	chr6
platelet	516362	E5_B-cell-like	2.91871	1.69e-20	chr13
height	598078	L5_Low_signal	3.36262	1.86e-20	chr17
BMD	284842	L1_Low_signal	-0.334901	1.89e-20	chr6
platelet	446592	E5_B-cell-like	0.959379	1.93e-20	chr11
height	465984	PC3_Polycomb	-3.0338	2.02e-20	chr12
height	70824	E3_Brain_/_Melanocyte	0.737857	2.15e-20	chr2
BMD	932896	L6_Low_signal	-0.3251	2.32e-20	chr6
platelet	76666	E5_B-cell-like	3.26483	2.33e-20	chr2
platelet	479090	E9_Liver_/_Intestine	-30.6052	2.37e-20	chr12
height	522242	TN3_Transcription	-2.34622	2.52e-20	chr14
height	605996	E2_Multi-tissue	-0.588737	2.86e-20	chr17
BMI	575936	PC4_Polycomb_/_Bivalent_stem_cell_Enh	-10.1651	3.05e-20	chr16
BMD	453536	E6_Weak_epithelial	-0.00442627	3.12e-20	chr11
BMD	219016	E1_Stem_cell	-0.0629054	3.21e-20	chr5
height	640556	TN1_Transcription	2.97734	3.23e-20	chr19
height	202192	TN1_Transcription	-0.491792	3.31e-20	chr4
platelet	1180850	TF3_FOXA1_/_AR_/_ESR1	-16.0417	3.7e-20	chr14
BMD	162604	E5_B-cell-like	0.00806923	3.97e-20	chr3
height	221372	HET4_Heterochromatin	-3.58629	3.99e-20	chr5
height	558074	TN3_Transcription	0.959631	4e-20	chr15
height	261452	P_Promoter	0.157213	4.11e-20	chr6
height	162862	TF1_NANOG_/_FOXA1	3.75426	4.22e-20	chr3
BMD	335584	PC1_Polycomb_/_Heterochromatin	-0.0299596	4.3e-20	chr8
height	634280	TN3_Transcription	1.34358	4.58e-20	chr19
platelet	185448	TN4_Transcription	-4.1232	4.64e-20	chr4
height	558890	TN1_Transcription	-0.767723	4.67e-20	chr15
rhinitis	262670	TN1_Transcription	-0.267113	4.71e-20	chr6
height	338916	TN2_Transcription	-2.40409	4.85e-20	chr8
height	1200748	TF2_CEBPB	16.8593	5.63e-20	chr15
height	484154	PC3_Polycomb	5.41602	5.78e-20	chr12
FVC	828248	PC2_Weak_Polycomb	0.11265	5.99e-20	chr3
height	930682	HET2_Heterochromatin	-14.2405	6.74e-20	chr6
platelet	674692	PC3_Polycomb	-49.7687	6.96e-20	chr21
FVC	603446	TN3_Transcription	0.676498	7.57e-20	chr17
height	447172	E5_B-cell-like	0.515955	7.78e-20	chr11
height	138952	TN4_Transcription	-0.852368	7.82e-20	chr3
height	79860	TN2_Transcription	5.33694	7.91e-20	chr2
height	178298	TF3_FOXA1_/_AR_/_ESR1	0.279222	9.05e-20	chr4
height	930850	E3_Brain_/_Melanocyte	-15.6041	9.44e-20	chr6
FVC	930756	HET2_Heterochromatin	-3.7436	9.45e-20	chr6
height	358918	L4_Low_signal	-0.97606	9.82e-20	chr8
asthma	90004	TN2_Transcription	1.1928	1.21e-19	chr2
platelet	263710	TN2_Transcription	-2.92221	1.24e-19	chr6
BMD	323624	E5_B-cell-like	-0.0521463	1.28e-19	chr7
height	491536	E4_Multi-tissue	0.276696	1.3e-19	chr12
platelet	478784	E5_B-cell-like	-4.24435	1.31e-19	chr12
height	268450	E2_Multi-tissue	0.647953	1.36e-19	chr6
height	120682	E11_T-cell	0.413732	1.42e-19	chr2
height	661638	TN1_Transcription	-0.89899	1.49e-19	chr20
platelet	459184	E3_Brain_/_Melanocyte	-18.2268	1.5e-19	chr11
height	644214	HET2_Heterochromatin	-1.88843	1.52e-19	chr19
height	262366	TN1_Transcription	-1.51483	1.63e-19	chr6
platelet	481030	PC1_Polycomb_/_Heterochromatin	14.2083	1.76e-19	chr12
height	932896	L6_Low_signal	-11.5677	1.79e-19	chr6
height	560132	TN4_Transcription	0.614187	1.79e-19	chr15
height	120852	TN2_Transcription	-0.417694	1.8e-19	chr2
height	1248560	L6_Low_signal	1.29154	1.81e-19	chr18
height	551698	L5_Low_signal	0.855638	1.81e-19	chr15
height	377078	L6_Low_signal	2.94912	1.83e-19	chr9
platelet	168346	E9_Liver_/_Intestine	16.4943	1.95e-19	chr3
height	202272	L5_Low_signal	-2.07442	1.99e-19	chr4
height	925632	PC3_Polycomb	1.15153	2.02e-19	chr5
height	339176	TF2_CEBPB	1.75038	2.05e-19	chr8
BMI	557254	PC4_Polycomb_/_Bivalent_stem_cell_Enh	1.44986	2.14e-19	chr15
FVC	261602	PC1_Polycomb_/_Heterochromatin	0.148357	2.26e-19	chr6
BMD	335532	L5_Low_signal	-0.00618807	2.31e-19	chr8
height	84214	E7_Monocyte_/_Macrophage	0.995417	2.32e-19	chr2
BMD	443086	TN3_Transcription	0.0281249	2.45e-19	chr11
platelet	596124	E2_Multi-tissue	-0.61293	2.56e-19	chr17
height	443520	L3_Low_signal	13.2526	2.72e-19	chr11
height	443596	TN3_Transcription	-3.60192	2.86e-19	chr11
height	293220	PC1_Polycomb_/_Heterochromatin	1.04306	2.89e-19	chr6
height	1246426	L5_Low_signal	1.22917	2.9e-19	chr18
height	162880	E1_Stem_cell	-1.08358	2.91e-19	chr3
height	447286	PC2_Weak_Polycomb	9.17004	2.94e-19	chr11
height	227556	E9_Liver_/_Intestine	0.815452	2.96e-19	chr5
height	1011152	HET2_Heterochromatin	-9.09174	3.03e-19	chr8
BMD	465984	PC3_Polycomb	-0.0805947	3.15e-19	chr12
height	104338	TF3_FOXA1_/_AR_/_ESR1	2.17755	3.19e-19	chr2
height	138240	TN3_Transcription	1.24841	3.32e-19	chr3
height	521478	E4_Multi-tissue	-0.153133	3.59e-19	chr14
platelet	587488	E12_Erythroblast-like	-10.498	3.6e-19	chr16
height	930968	L6_Low_signal	-27.7544	3.67e-19	chr6
height	635828	E11_T-cell	0.307481	3.87e-19	chr19
height	261882	HET3_Heterochromatin	4.82639	3.93e-19	chr6
chronotype	1127908	CTCF_CTCF-Cohesin	0.0720245	3.95e-19	chr12
height	932702	TN4_Transcription	-3.12297	4.05e-19	chr6
FVC	195152	TF4_OTX2	-0.37036	4.3e-19	chr4
SBP	635856	TN3_Transcription	-6.64702	4.43e-19	chr19
height	116942	E4_Multi-tissue	0.223684	4.53e-19	chr2
chronotype	1127982	L1_Low_signal	1.40772	5.29e-19	chr12
rhinitis	1228796	TN2_Transcription	0.372714	5.64e-19	chr17
BMD	478120	E9_Liver_/_Intestine	0.0288432	6.26e-19	chr12
platelet	598194	TN1_Transcription	-6.81849	6.31e-19	chr17
BMD	357916	E8_Weak_multi-tissue	-0.0462766	6.42e-19	chr8
height	202244	L5_Low_signal	7.15347	6.86e-19	chr4
platelet	494298	TN1_Transcription	2.83259	7.21e-19	chr12
platelet	644844	TN1_Transcription	-8.15398	7.38e-19	chr19
BMD	440684	E11_T-cell	0.0231886	7.85e-19	chr11
platelet	394512	PC1_Polycomb_/_Heterochromatin	63.0069	8.11e-19	chr9
BMD	932864	TF5_AR	0.033909	8.28e-19	chr6
BMD	1232034	TN2_Transcription	-0.0988468	8.5e-19	chr17
menarche	625658	TN1_Transcription	-0.741775	8.7e-19	chr18
platelet	234208	E1_Stem_cell	24.7933	9.23e-19	chr5
height	592388	TN4_Transcription	-1.93346	9.74e-19	chr17
height	597620	PC2_Weak_Polycomb	1.73034	9.79e-19	chr17
menarche	787592	L6_Low_signal	-1.53444	1.01e-18	chr2
height	264164	TN2_Transcription	-1.86746	1.05e-18	chr6
height	318516	TN4_Transcription	0.70001	1.07e-18	chr7
rhinitis	895376	HET4_Heterochromatin	0.878387	1.08e-18	chr5
platelet	498626	TN4_Transcription	-7.58679	1.1e-18	chr12
BMI	156150	E4_Multi-tissue	-0.0291488	1.13e-18	chr3
height	278952	E11_T-cell	-0.282622	1.14e-18	chr6
platelet	640452	PC4_Polycomb_/_Bivalent_stem_cell_Enh	7.16074	1.14e-18	chr19
height	572298	PC4_Polycomb_/_Bivalent_stem_cell_Enh	-1.07467	1.23e-18	chr16
platelet	139874	E6_Weak_epithelial	-0.28442	1.33e-18	chr3
height	435612	TN3_Transcription	-2.75444	1.37e-18	chr11
menarche	80106	L4_Low_signal	3.62831	1.4e-18	chr2
platelet	261910	PC1_Polycomb_/_Heterochromatin	-36.4375	1.44e-18	chr6
BMD	1106744	E6_Weak_epithelial	-0.00238928	1.47e-18	chr11
platelet	547512	E3_Brain_/_Melanocyte	6.40933	1.49e-18	chr15
BMD	304340	PC2_Weak_Polycomb	-0.0586234	1.56e-18	chr7
BMI	934380	HET2_Heterochromatin	-18.3032	1.57e-18	chr6
asthma	262684	TN1_Transcription	-1.76183	1.61e-18	chr6
height	803690	TN2_Transcription	-5.18252	1.76e-18	chr3
menarche	151640	E11_T-cell	-0.234596	1.77e-18	chr3
height	116566	E9_Liver_/_Intestine	-0.343468	1.85e-18	chr2
height	930870	PC3_Polycomb	2.50671	1.88e-18	chr6
BMI	443520	L3_Low_signal	-9.65558	1.9e-18	chr11
asthma	557072	L5_Low_signal	-0.361182	2.01e-18	chr15
height	272660	TN2_Transcription	0.862755	2.08e-18	chr6
platelet	443344	CTCF_CTCF-Cohesin	4.43834	2.1e-18	chr11
BMI	229922	PC4_Polycomb_/_Bivalent_stem_cell_Enh	1.40427	2.13e-18	chr5
BMD	551708	HET1_Heterochromatin	-0.0145599	2.32e-18	chr15
height	443466	TN4_Transcription	0.720628	2.37e-18	chr11
height	263132	PC3_Polycomb	2.38	2.45e-18	chr6
BMI	169158	TN2_Transcription	-0.272844	2.46e-18	chr3
height	133792	E12_Erythroblast-like	0.103786	2.5e-18	chr3
platelet	261978	CTCF_CTCF-Cohesin	0.59545	2.57e-18	chr6
height	120912	PC3_Polycomb	-1.45858	2.64e-18	chr2
height	969104	L4_Low_signal	0.614407	2.69e-18	chr7
height	927110	L3_Low_signal	5.11218	2.81e-18	chr6
BMD	267680	E4_Multi-tissue	0.0144244	2.85e-18	chr6
height	803584	HET1_Heterochromatin	-1.39939	3.23e-18	chr3
rhinitis	571204	E4_Multi-tissue	0.0944863	3.24e-18	chr16
BMI	948404	TN2_Transcription	1.61819	3.24e-18	chr6
height	241436	L3_Low_signal	4.72901	3.43e-18	chr5
platelet	366468	E1_Stem_cell	-3.98069	3.45e-18	chr9
height	217088	E8_Weak_multi-tissue	2.32555	3.73e-18	chr5
FVC	930808	TF2_CEBPB	2.16762	3.77e-18	chr6
platelet	461478	TN3_Transcription	4.03407	3.92e-18	chr11
BMI	1037954	L1_Low_signal	-17.3856	3.94e-18	chr9
height	480804	TN1_Transcription	-2.56949	3.96e-18	chr12
height	261274	P_Promoter	0.226578	4.05e-18	chr6
height	918266	E12_Erythroblast-like	-1.47227	4.06e-18	chr5
platelet	804328	E8_Weak_multi-tissue	-21.6025	4.11e-18	chr3
BMD	459470	TF2_CEBPB	-0.0809101	4.17e-18	chr11
height	1192358	PC2_Weak_Polycomb	0.914439	4.29e-18	chr15
height	198296	P_Promoter	-0.360715	4.33e-18	chr4
height	238992	E11_T-cell	-0.333298	4.45e-18	chr5
height	637640	TN3_Transcription	1.21158	4.67e-18	chr19
asthma	481132	PC3_Polycomb	-1.36061	4.68e-18	chr12
platelet	168230	TN1_Transcription	-10.5416	4.82e-18	chr3
FVC	261536	P_Promoter	-0.0129534	5.23e-18	chr6
height	446746	PC3_Polycomb	3.71452	5.24e-18	chr11
height	556884	TN3_Transcription	-1.13079	5.4e-18	chr15
height	385322	E4_Multi-tissue	-0.0624479	5.7e-18	chr9
height	1142028	PC1_Polycomb_/_Heterochromatin	1.35547	6.09e-18	chr12
height	118232	E12_Erythroblast-like	-0.185535	6.1e-18	chr2
height	138134	PC3_Polycomb	-3.77784	6.16e-18	chr3
menarche	435800	E8_Weak_multi-tissue	0.152938	6.17e-18	chr11
menarche	1246178	L3_Low_signal	0.57189	6.2e-18	chr18
BMD	607560	E3_Brain_/_Melanocyte	-0.0166455	6.2e-18	chr17
BMI	1248712	TF2_CEBPB	-7.42479	6.27e-18	chr18
height	510298	E9_Liver_/_Intestine	2.38748	6.4e-18	chr13
height	1206690	E12_Erythroblast-like	6.60239	6.61e-18	chr16
BMI	815124	E1_Stem_cell	-2.18726	6.97e-18	chr3
height	838266	L7_Low_signal	12.8014	7.08e-18	chr4
BMD	443006	TN1_Transcription	0.0206815	7.1e-18	chr11
height	137376	TN2_Transcription	2.67573	7.25e-18	chr3
height	610084	E4_Multi-tissue	0.311254	7.29e-18	chr17
platelet	539208	E5_B-cell-like	5.54503	7.55e-18	chr14
menarche	276940	E9_Liver_/_Intestine	0.083139	7.68e-18	chr6
FVC	582892	E2_Multi-tissue	0.0836543	7.84e-18	chr16
BMI	137742	PC1_Polycomb_/_Heterochromatin	-2.15992	7.97e-18	chr3
height	219808	P_Promoter	-0.277429	8.01e-18	chr5
BMD	955164	L5_Low_signal	-0.0322462	8.19e-18	chr6
height	498330	TN1_Transcription	-1.03267	8.26e-18	chr12
asthma	275482	E2_Multi-tissue	0.103614	8.67e-18	chr6
BMD	334872	E1_Stem_cell	-0.159173	8.72e-18	chr8
BMD	335374	TN1_Transcription	-0.00788669	9.28e-18	chr8
height	831864	PC3_Polycomb	4.56713	9.34e-18	chr3
BMI	226724	TN2_Transcription	0.615457	9.45e-18	chr5
height	264386	TN1_Transcription	-0.533558	9.57e-18	chr6
height	1232120	PC3_Polycomb	1.05769	9.79e-18	chr17
height	251556	TN2_Transcription	2.38142	9.98e-18	chr5
height	582868	TN1_Transcription	0.435164	1.01e-17	chr16
platelet	263154	E1_Stem_cell	-4.73224	1.02e-17	chr6
rhinitis	450862	TN2_Transcription	1.16779	1.03e-17	chr11
FVC	262954	CTCF_CTCF-Cohesin	-0.00679574	1.03e-17	chr6
FVC	255650	P_Promoter	-0.0255384	1.04e-17	chr6
height	532996	E10_Brain	0.823675	1.09e-17	chr14
BMI	70872	TN1_Transcription	0.435711	1.1e-17	chr2
FVC	1262916	E8_Weak_multi-tissue	0.697949	1.1e-17	chr20
SBP	335268	PC3_Polycomb	25.8839	1.13e-17	chr8
height	588864	TN3_Transcription	0.360691	1.13e-17	chr16
height	263860	TN1_Transcription	0.432183	1.15e-17	chr6
height	931062	PC3_Polycomb	-24.5773	1.27e-17	chr6
height	238876	E4_Multi-tissue	1.34782	1.27e-17	chr5
platelet	434128	TN2_Transcription	-4.24639	1.28e-17	chr11
height	535260	E4_Multi-tissue	-0.104185	1.34e-17	chr14
platelet	478842	TN3_Transcription	8.908	1.35e-17	chr12
FVC	752772	TF5_AR	0.189215	1.39e-17	chr2
height	931752	E7_Monocyte_/_Macrophage	1.75422	1.44e-17	chr6
height	828124	TF5_AR	-0.778275	1.45e-17	chr3
BMD	79392	PC4_Polycomb_/_Bivalent_stem_cell_Enh	-0.0280229	1.49e-17	chr2
height	124140	TN1_Transcription	0.96529	1.49e-17	chr2
platelet	960938	HET3_Heterochromatin	-25.5304	1.49e-17	chr6
height	467520	TN2_Transcription	0.6525	1.54e-17	chr12
height	104420	E1_Stem_cell	0.454355	1.6e-17	chr2
height	653764	TF5_AR	-0.903899	1.64e-17	chr20
platelet	858102	L3_Low_signal	-26.0287	1.71e-17	chr4
platelet	590472	TN2_Transcription	-6.63047	1.73e-17	chr17
BMD	335268	PC3_Polycomb	0.233586	1.75e-17	chr8
height	603974	L3_Low_signal	-2.52528	1.96e-17	chr17
rhinitis	564660	TN3_Transcription	0.48219	2.03e-17	chr15
BMI	654508	E5_B-cell-like	-0.863072	2.08e-17	chr20
height	659924	TN2_Transcription	-1.01933	2.17e-17	chr20
platelet	990454	HET4_Heterochromatin	-8.56312	2.19e-17	chr7
height	916692	HET2_Heterochromatin	-1.56908	2.5e-17	chr5
FVC	816830	TF3_FOXA1_/_AR_/_ESR1	-0.578297	2.55e-17	chr3
FVC	873462	E9_Liver_/_Intestine	0.289275	2.57e-17	chr4
platelet	498114	TN2_Transcription	-14.2066	2.67e-17	chr12
height	477406	E2_Multi-tissue	-0.409442	2.83e-17	chr12
height	238504	E5_B-cell-like	-1.16343	2.84e-17	chr5
FVC	261300	TN1_Transcription	-0.0883066	2.89e-17	chr6
FVC	106382	P_Promoter	0.0239006	3.01e-17	chr2
height	261896	E4_Multi-tissue	-0.548407	3.15e-17	chr6
height	327138	E1_Stem_cell	-0.236642	3.17e-17	chr7
BMI	1206500	TN2_Transcription	3.89676	3.21e-17	chr16
height	1227332	HET1_Heterochromatin	-7.98179	3.25e-17	chr17
height	498130	L4_Low_signal	2.22453	3.31e-17	chr12
platelet	532280	TF5_AR	-14.7775	3.34e-17	chr14
height	554910	E4_Multi-tissue	0.194159	3.36e-17	chr15
height	925654	PC1_Polycomb_/_Heterochromatin	1.08579	3.4e-17	chr5
height	366046	TN1_Transcription	-0.919828	3.5e-17	chr8
height	918320	L7_Low_signal	31.2193	3.69e-17	chr5
height	955074	TF2_CEBPB	2.33183	3.72e-17	chr6
platelet	318942	L5_Low_signal	6.333	3.99e-17	chr7
BMI	265836	L4_Low_signal	4.32251	4.05e-17	chr6
height	903200	PC3_Polycomb	-12.7347	4.15e-17	chr5
height	1223860	HET3_Heterochromatin	-2.09086	4.15e-17	chr17
platelet	367578	P_Promoter	-1.25645	4.21e-17	chr9
BMI	334644	E2_Multi-tissue	0.756782	4.27e-17	chr8
BMI	822946	L4_Low_signal	-1.5576	4.28e-17	chr3
BMI	157470	TN2_Transcription	-0.51255	4.48e-17	chr3
platelet	356570	P_Promoter	-1.55452	4.85e-17	chr8
height	262282	TN1_Transcription	0.963936	4.88e-17	chr6
asthma	238992	E11_T-cell	0.166318	5.25e-17	chr5
platelet	166950	PC3_Polycomb	26.6916	5.26e-17	chr3
BMD	470310	HET1_Heterochromatin	-0.0769825	5.54e-17	chr12
height	568700	E4_Multi-tissue	-0.013646	5.73e-17	chr16
height	87588	PC3_Polycomb	-2.26111	5.86e-17	chr2
insomnia	82664	TN1_Transcription	0.168068	6e-17	chr2
BMI	498354	TN1_Transcription	-1.06922	6.03e-17	chr12
height	931426	PC1_Polycomb_/_Heterochromatin	-0.893526	6.1e-17	chr6
height	218180	TN3_Transcription	1.55427	7e-17	chr5
height	280768	E4_Multi-tissue	-0.136679	7.34e-17	chr6
BMD	335170	TN4_Transcription	-0.010509	7.35e-17	chr8
menarche	455946	PC4_Polycomb_/_Bivalent_stem_cell_Enh	-0.351199	7.6e-17	chr11
SBP	71488	PC4_Polycomb_/_Bivalent_stem_cell_Enh	2.32706	7.68e-17	chr2
rhinitis	262780	TN3_Transcription	-0.808027	7.89e-17	chr6
SBP	955168	L1_Low_signal	66.535	7.93e-17	chr6
platelet	140606	PC4_Polycomb_/_Bivalent_stem_cell_Enh	8.43274	8.3e-17	chr3
BMD	1262868	TF1_NANOG_/_FOXA1	-0.0547189	8.39e-17	chr20
asthma	600830	E5_B-cell-like	0.339104	8.56e-17	chr17
BMI	441908	TN2_Transcription	-1.0398	8.8e-17	chr11
height	88212	TN1_Transcription	-5.05456	8.85e-17	chr2
BMD	510534	E7_Monocyte_/_Macrophage	0.00530042	9.06e-17	chr13
height	567568	CTCF_CTCF-Cohesin	1.05946	9.08e-17	chr15
platelet	443444	E12_Erythroblast-like	-5.95878	9.26e-17	chr11
platelet	226724	TN2_Transcription	-7.46222	9.51e-17	chr5
height	558948	PC4_Polycomb_/_Bivalent_stem_cell_Enh	-0.730049	9.74e-17	chr15
height	239804	TN4_Transcription	-1.98341	1.03e-16	chr5
height	620802	L3_Low_signal	4.03616	1.05e-16	chr18
height	93932	L3_Low_signal	-2.73397	1.08e-16	chr2
platelet	443996	E1_Stem_cell	-14.0771	1.18e-16	chr11
height	595594	TN4_Transcription	-1.13715	1.19e-16	chr17
platelet	168410	P_Promoter	-3.13248	1.2e-16	chr3
BMD	932968	L5_Low_signal	-0.0115233	1.23e-16	chr6
height	960894	L3_Low_signal	-2.96641	1.26e-16	chr6
SBP	335374	TN1_Transcription	-0.838695	1.26e-16	chr8
height	894840	PC3_Polycomb	5.80533	1.3e-16	chr5
platelet	549638	E4_Multi-tissue	3.99481	1.31e-16	chr15
BMI	604320	TN4_Transcription	0.800326	1.33e-16	chr17
rhinitis	262068	PC2_Weak_Polycomb	0.215982	1.39e-16	chr6
BMD	488080	E2_Multi-tissue	0.0650505	1.39e-16	chr12
BMI	1141672	E7_Monocyte_/_Macrophage	0.879276	1.39e-16	chr12
platelet	556090	TN1_Transcription	-6.42051	1.4e-16	chr15
BMD	517322	E1_Stem_cell	-0.00477277	1.43e-16	chr13
height	387048	TN2_Transcription	-2.67884	1.43e-16	chr9
height	1196488	PC1_Polycomb_/_Heterochromatin	-5.93356	1.43e-16	chr15
asthma	642886	CTCF_CTCF-Cohesin	0.536633	1.44e-16	chr19
platelet	457492	TN2_Transcription	-5.72577	1.49e-16	chr11
height	278566	TN3_Transcription	-3.70179	1.49e-16	chr6
menarche	1254822	TN3_Transcription	0.747994	1.53e-16	chr19
platelet	902976	E1_Stem_cell	34.3469	1.55e-16	chr5
height	654540	E4_Multi-tissue	0.161403	1.56e-16	chr20
height	1164606	TF2_CEBPB	-13.2695	1.57e-16	chr13
height	560060	TN1_Transcription	0.894999	1.65e-16	chr15
height	267564	E1_Stem_cell	0.892827	1.66e-16	chr6
height	550734	E5_B-cell-like	-0.828198	1.68e-16	chr15
height	331066	L5_Low_signal	-1.96329	1.7e-16	chr7
menarche	582750	E9_Liver_/_Intestine	-0.140354	1.75e-16	chr16
FVC	931212	HET2_Heterochromatin	0.445909	1.77e-16	chr6
platelet	931386	L3_Low_signal	-11.6739	1.78e-16	chr6
height	863566	L1_Low_signal	11.2766	1.81e-16	chr4
height	308696	E9_Liver_/_Intestine	0.973571	1.85e-16	chr7
menarche	942560	PC2_Weak_Polycomb	1.64728	2.06e-16	chr6
height	482964	E4_Multi-tissue	0.702624	2.06e-16	chr12
BMI	1153322	HET4_Heterochromatin	-1.18933	2.14e-16	chr13
height	932938	TN3_Transcription	-0.360882	2.28e-16	chr6
menarche	276998	E8_Weak_multi-tissue	-0.303246	2.41e-16	chr6
height	501746	TN3_Transcription	-0.524779	2.42e-16	chr13
asthma	571286	L3_Low_signal	-13.7934	2.45e-16	chr16
BMI	823638	E10_Brain	-0.574795	2.75e-16	chr3
platelet	239706	E6_Weak_epithelial	-7.08915	2.86e-16	chr5
BMD	443158	TN2_Transcription	0.0768612	2.95e-16	chr11
height	217134	E4_Multi-tissue	0.187589	3e-16	chr5
height	551650	E10_Brain	0.31763	3.06e-16	chr15
height	238562	TN4_Transcription	-0.58893	3.19e-16	chr5
height	932990	TF1_NANOG_/_FOXA1	8.9669	3.2e-16	chr6
BMI	620846	TN1_Transcription	0.229093	3.31e-16	chr18
platelet	531452	E11_T-cell	1.80673	3.66e-16	chr14
platelet	1148234	TN3_Transcription	7.78568	3.84e-16	chr13
BMI	753758	HET1_Heterochromatin	-0.408199	3.98e-16	chr2
BMD	303260	E8_Weak_multi-tissue	0.0187362	4.04e-16	chr7
platelet	443494	TN1_Transcription	-7.09209	4.16e-16	chr11
BMI	511672	E9_Liver_/_Intestine	0.635592	4.44e-16	chr13
rhinitis	262248	TN1_Transcription	-0.603387	4.59e-16	chr6
BMI	441964	E8_Weak_multi-tissue	-0.703813	4.65e-16	chr11
BMI	539352	E5_B-cell-like	0.120439	4.9e-16	chr14
height	389594	TN3_Transcription	-2.78599	5.15e-16	chr9
height	644184	P_Promoter	-0.0509505	5.2e-16	chr19
BMI	1034688	TN2_Transcription	0.805574	5.24e-16	chr9
platelet	505134	L5_Low_signal	28.7972	5.37e-16	chr13
height	470694	TN2_Transcription	0.41982	5.5e-16	chr12
SBP	455762	TN2_Transcription	-1.41869	5.61e-16	chr11
BMI	119700	E5_B-cell-like	-0.37853	5.74e-16	chr2
platelet	766586	E7_Monocyte_/_Macrophage	26.123	5.75e-16	chr2
platelet	318840	L5_Low_signal	-3.99411	5.89e-16	chr7
height	174496	PC4_Polycomb_/_Bivalent_stem_cell_Enh	1.4016	5.91e-16	chr4
platelet	597274	TN4_Transcription	31.533	6.36e-16	chr17
BMI	443420	L3_Low_signal	2.3343	6.38e-16	chr11
BMD	1263192	E10_Brain	-0.0209681	6.4e-16	chr20
BMI	1185368	HET3_Heterochromatin	-1.91941	6.43e-16	chr14
height	255324	E11_T-cell	-0.655132	6.45e-16	chr6
height	481448	E4_Multi-tissue	0.26338	6.81e-16	chr12
height	1107374	PC2_Weak_Polycomb	5.3154	6.86e-16	chr11
height	157260	E4_Multi-tissue	0.145591	6.87e-16	chr3
height	951302	TN2_Transcription	0.26225	6.91e-16	chr6
BMD	675972	TF4_OTX2	-0.158237	6.95e-16	chr21
BMD	655590	E4_Multi-tissue	-0.00384046	6.96e-16	chr20
height	613908	TN3_Transcription	1.03521	7.22e-16	chr17
height	750466	L5_Low_signal	4.95125	7.23e-16	chr2
height	138866	TN4_Transcription	0.2618	7.36e-16	chr3
height	598138	TN3_Transcription	2.16652	7.58e-16	chr17
platelet	383612	L5_Low_signal	-15.0948	8.64e-16	chr9
intelligence	137794	TN2_Transcription	0.335994	9.31e-16	chr3
height	187452	E8_Weak_multi-tissue	1.28014	9.34e-16	chr4
menarche	1179522	HET1_Heterochromatin	-0.832955	9.45e-16	chr14
BMI	576642	L3_Low_signal	-1.7239	9.48e-16	chr16
platelet	383116	TN3_Transcription	-11.3742	9.5e-16	chr9
FVC	569334	PC3_Polycomb	-0.413938	9.57e-16	chr16
BMD	334954	E6_Weak_epithelial	-0.0119537	9.82e-16	chr8
height	134648	TN3_Transcription	-2.08608	1.01e-15	chr3
height	138414	TN4_Transcription	2.06678	1.02e-15	chr3
height	636890	E5_B-cell-like	-0.435476	1.04e-15	chr19
platelet	453128	P_Promoter	-1.12301	1.06e-15	chr11
BMD	284888	TN2_Transcription	-0.0154609	1.06e-15	chr6
height	966732	TN2_Transcription	-2.08645	1.06e-15	chr7
height	153166	TN4_Transcription	-0.989397	1.1e-15	chr3
BMD	676086	E2_Multi-tissue	0.0109573	1.1e-15	chr21
BMI	335374	TN1_Transcription	-0.200887	1.13e-15	chr8
BMI	1170624	E9_Liver_/_Intestine	3.27772	1.13e-15	chr14
height	73830	E3_Brain_/_Melanocyte	6.6531	1.17e-15	chr2
BMD	162588	TF1_NANOG_/_FOXA1	0.124814	1.21e-15	chr3
FVC	664534	PC4_Polycomb_/_Bivalent_stem_cell_Enh	0.151903	1.23e-15	chr20
height	560750	TN1_Transcription	-0.930803	1.25e-15	chr15
platelet	532550	E2_Multi-tissue	2.17804	1.28e-15	chr14
height	432596	E4_Multi-tissue	0.375598	1.32e-15	chr11
height	162702	E4_Multi-tissue	-1.15259	1.33e-15	chr3
platelet	600066	TN1_Transcription	1.51066	1.37e-15	chr17
height	262224	TN1_Transcription	1.76588	1.38e-15	chr6
platelet	787860	PC1_Polycomb_/_Heterochromatin	57.0223	1.42e-15	chr2
platelet	93538	L4_Low_signal	6.60268	1.44e-15	chr2
BMD	1000650	TN3_Transcription	0.00770718	1.45e-15	chr8
platelet	459930	E1_Stem_cell	2.25154	1.48e-15	chr11
height	301012	E8_Weak_multi-tissue	-1.59021	1.51e-15	chr7
menarche	554450	E9_Liver_/_Intestine	-1.64853	1.55e-15	chr15
platelet	262754	E9_Liver_/_Intestine	1.19186	1.66e-15	chr6
height	568880	TN4_Transcription	0.564115	1.66e-15	chr16
height	563334	TN1_Transcription	-0.61296	1.67e-15	chr15
chronotype	1127816	L7_Low_signal	0.219524	1.7e-15	chr12
height	550658	TN1_Transcription	-0.341058	1.71e-15	chr15
height	297326	PC1_Polycomb_/_Heterochromatin	2.69211	1.77e-15	chr7
height	609104	E9_Liver_/_Intestine	0.816295	1.79e-15	chr17
SBP	590368	TN1_Transcription	0.614546	1.8e-15	chr17
rhinitis	262854	E12_Erythroblast-like	-0.134983	1.86e-15	chr6
platelet	461526	TN1_Transcription	16.7513	1.89e-15	chr11
BMI	599698	TN1_Transcription	0.201974	1.92e-15	chr17
height	603740	TN1_Transcription	-0.314853	1.94e-15	chr17
height	225854	TN1_Transcription	3.31057	1.99e-15	chr5
height	361048	PC2_Weak_Polycomb	1.67049	2.12e-15	chr8
menarche	146070	E4_Multi-tissue	-0.234076	2.17e-15	chr3
height	839330	L1_Low_signal	-43.5403	2.21e-15	chr4
height	183806	L5_Low_signal	0.335788	2.27e-15	chr4
FVC	1158300	CTCF_CTCF-Cohesin	0.0528576	2.29e-15	chr13
chronotype	1125832	HET4_Heterochromatin	0.118327	2.3e-15	chr12
chronotype	1125904	L6_Low_signal	-0.252106	2.38e-15	chr12
platelet	390998	E9_Liver_/_Intestine	-14.8274	2.39e-15	chr9
BMD	137886	TN4_Transcription	0.00558333	2.43e-15	chr3
SBP	780264	PC2_Weak_Polycomb	2.01241	2.44e-15	chr2
BMD	112060	E1_Stem_cell	-0.0266522	2.5e-15	chr2
BMD	662804	TN3_Transcription	-0.0187137	2.55e-15	chr20
height	551566	TN4_Transcription	-0.692525	2.58e-15	chr15
BMI	582908	E3_Brain_/_Melanocyte	-0.160446	2.59e-15	chr16
height	535180	TN1_Transcription	1.41583	2.63e-15	chr14
height	349988	TF4_OTX2	-0.90219	2.69e-15	chr8
height	157586	L5_Low_signal	0.222276	2.76e-15	chr3
SBP	559856	TN1_Transcription	7.33285	2.78e-15	chr15
rhinitis	450828	TN1_Transcription	3.75935	2.93e-15	chr11
BMI	263972	E1_Stem_cell	-0.14607	3.01e-15	chr6
platelet	1143890	L3_Low_signal	28.7222	3.01e-15	chr12
height	491596	PC3_Polycomb	1.70716	3.04e-15	chr12
BMD	932926	E10_Brain	-0.0520325	3.08e-15	chr6
BMI	443304	L3_Low_signal	-1.58579	3.16e-15	chr11
platelet	527112	TN1_Transcription	-10.3879	3.2e-15	chr14
height	1124080	L1_Low_signal	-5.84463	3.31e-15	chr12
height	470184	E11_T-cell	0.665752	3.37e-15	chr12
platelet	639464	TN1_Transcription	3.5175	3.43e-15	chr19
platelet	314522	E6_Weak_epithelial	-16.6708	3.46e-15	chr7
height	610774	E6_Weak_epithelial	0.45808	3.5e-15	chr17
height	1015518	E8_Weak_multi-tissue	0.993088	3.52e-15	chr8
BMD	112108	PC2_Weak_Polycomb	0.010946	3.57e-15	chr2
height	609276	E4_Multi-tissue	-0.40761	3.62e-15	chr17
height	675828	E6_Weak_epithelial	-0.703254	3.62e-15	chr21
menarche	1186498	L1_Low_signal	-5.39577	3.66e-15	chr14
platelet	549442	TN1_Transcription	40.9286	3.76e-15	chr15
rhinitis	368114	PC2_Weak_Polycomb	-1.93001	3.8e-15	chr9
BMI	753628	E3_Brain_/_Melanocyte	-0.352262	3.84e-15	chr2
height	173492	E5_B-cell-like	0.260452	3.87e-15	chr4
height	895568	TF3_FOXA1_/_AR_/_ESR1	-0.622706	3.96e-15	chr5
height	1026142	TN2_Transcription	2.40522	4.1e-15	chr8
height	1196764	L7_Low_signal	-19.8968	4.31e-15	chr15
platelet	790920	E1_Stem_cell	8.4041	4.4e-15	chr2
BMI	811788	TF1_NANOG_/_FOXA1	-2.29191	4.44e-15	chr3
platelet	77448	E5_B-cell-like	-1.058	4.55e-15	chr2
height	568756	TN3_Transcription	-2.90647	4.69e-15	chr16
BMI	1271880	L1_Low_signal	-5.58096	4.78e-15	chr20
height	615062	PC2_Weak_Polycomb	-0.836137	4.79e-15	chr17
BMI	934254	HET4_Heterochromatin	-0.640028	4.9e-15	chr6
height	218446	E4_Multi-tissue	0.103271	5.06e-15	chr5
height	861468	TN2_Transcription	1.44812	5.26e-15	chr4
height	542694	TN4_Transcription	-0.855235	5.44e-15	chr14
height	750414	E1_Stem_cell	-0.907272	5.53e-15	chr2
BMD	283846	TN1_Transcription	0.0638489	5.59e-15	chr6
height	845740	L4_Low_signal	-0.117694	5.62e-15	chr4
platelet	495100	PC2_Weak_Polycomb	-277.714	5.69e-15	chr12
height	261890	PC1_Polycomb_/_Heterochromatin	4.29954	5.71e-15	chr6
height	559550	E2_Multi-tissue	-0.613872	5.72e-15	chr15
height	318568	HET1_Heterochromatin	2.34041	5.8e-15	chr7
menarche	137632	TN1_Transcription	-0.229302	5.87e-15	chr3
menarche	385268	E2_Multi-tissue	0.160116	5.95e-15	chr9
platelet	446696	E12_Erythroblast-like	-3.58354	6.31e-15	chr11
height	395838	PC4_Polycomb_/_Bivalent_stem_cell_Enh	1.17766	6.43e-15	chr9
platelet	507280	TN4_Transcription	11.4623	6.63e-15	chr13
menarche	151604	E1_Stem_cell	-0.106579	6.7e-15	chr3
BMI	498466	PC2_Weak_Polycomb	0.690741	6.75e-15	chr12
rhinitis	931604	CTCF_CTCF-Cohesin	0.0662182	6.76e-15	chr6
height	370326	P_Promoter	0.157358	6.83e-15	chr9
platelet	1227462	TN2_Transcription	-5.03795	6.83e-15	chr17
asthma	931620	PC1_Polycomb_/_Heterochromatin	0.324847	6.89e-15	chr6
FVC	124238	P_Promoter	0.0162746	6.91e-15	chr2
platelet	305574	L5_Low_signal	3.59403	7.25e-15	chr7
BMI	1015970	E2_Multi-tissue	-0.238705	7.28e-15	chr8
platelet	457430	TN4_Transcription	3.45431	7.68e-15	chr11
platelet	494488	TF3_FOXA1_/_AR_/_ESR1	-16.5857	8.07e-15	chr12
platelet	443552	E4_Multi-tissue	2.18221	8.29e-15	chr11
insomnia	753638	HET2_Heterochromatin	-0.368858	8.39e-15	chr2
height	521110	PC1_Polycomb_/_Heterochromatin	3.64289	8.44e-15	chr13
BMD	335068	TN4_Transcription	-0.0464264	8.49e-15	chr8
asthma	575454	TN3_Transcription	0.205012	8.69e-15	chr16
chronotype	1125788	HET4_Heterochromatin	-0.126208	8.79e-15	chr12
asthma	262464	TF3_FOXA1_/_AR_/_ESR1	-0.380962	9.07e-15	chr6
height	447216	PC3_Polycomb	-0.926986	9.42e-15	chr11
asthma	262996	TF2_CEBPB	-0.549795	9.52e-15	chr6
height	263318	TN1_Transcription	-0.145851	9.54e-15	chr6
SBP	308572	L4_Low_signal	-12.4512	9.62e-15	chr7
platelet	875028	L1_Low_signal	-195.928	9.74e-15	chr4
platelet	263788	TN3_Transcription	11.1529	1.01e-14	chr6
height	913090	TF2_CEBPB	-5.68704	1.02e-14	chr5
height	510252	E2_Multi-tissue	-0.20776	1.02e-14	chr13
height	88272	CTCF_CTCF-Cohesin	4.55429	1.03e-14	chr2
platelet	262224	TN1_Transcription	-16.0038	1.04e-14	chr6
platelet	93494	CTCF_CTCF-Cohesin	-0.529605	1.04e-14	chr2
BMI	536216	E8_Weak_multi-tissue	2.62055	1.06e-14	chr14
height	925764	PC1_Polycomb_/_Heterochromatin	0.631029	1.09e-14	chr5
height	338854	E8_Weak_multi-tissue	-0.512937	1.1e-14	chr8
height	492966	CTCF_CTCF-Cohesin	-0.969252	1.11e-14	chr12
height	563064	E7_Monocyte_/_Macrophage	-0.121043	1.14e-14	chr15
height	123884	PC1_Polycomb_/_Heterochromatin	0.724153	1.14e-14	chr2
menarche	676208	TN1_Transcription	0.16302	1.17e-14	chr21
height	284060	E5_B-cell-like	0.944651	1.18e-14	chr6
height	139974	TN1_Transcription	0.936669	1.18e-14	chr3
BMI	433998	TN1_Transcription	0.287165	1.21e-14	chr11
rhinitis	480728	E11_T-cell	0.248976	1.22e-14	chr12
height	582768	TN3_Transcription	0.650965	1.24e-14	chr16
FVC	930932	L4_Low_signal	1.732	1.26e-14	chr6
menarche	616838	L4_Low_signal	0.489342	1.3e-14	chr18
BMD	487996	E11_T-cell	0.0247027	1.32e-14	chr12
height	582950	P_Promoter	-0.489718	1.35e-14	chr16
height	261510	P_Promoter	-0.107173	1.4e-14	chr6
platelet	446650	PC4_Polycomb_/_Bivalent_stem_cell_Enh	-4.12135	1.45e-14	chr11
menarche	582834	L3_Low_signal	0.776811	1.5e-14	chr16
height	293284	PC2_Weak_Polycomb	-0.744698	1.51e-14	chr6
height	443232	E2_Multi-tissue	-0.59242	1.52e-14	chr11
platelet	446758	TN3_Transcription	8.56064	1.53e-14	chr11
SBP	443378	TN3_Transcription	3.78125	1.53e-14	chr11
height	209794	PC2_Weak_Polycomb	0.549456	1.56e-14	chr4
BMI	666804	TF1_NANOG_/_FOXA1	-1.47022	1.57e-14	chr20
menarche	239744	TN4_Transcription	-0.232219	1.58e-14	chr5
height	191634	E8_Weak_multi-tissue	-0.103601	1.59e-14	chr4
height	262744	TN4_Transcription	-0.379193	1.72e-14	chr6
height	74302	TN1_Transcription	0.429613	1.72e-14	chr2
height	435800	E8_Weak_multi-tissue	0.388085	1.74e-14	chr11
height	292506	PC1_Polycomb_/_Heterochromatin	0.850856	1.76e-14	chr6
height	156864	E1_Stem_cell	0.285941	1.81e-14	chr3
platelet	1269396	HET3_Heterochromatin	-44.5665	1.83e-14	chr20
BMI	226780	TN3_Transcription	-0.33026	1.87e-14	chr5
height	482862	E6_Weak_epithelial	0.334256	1.87e-14	chr12
height	931092	TN2_Transcription	-3.71384	1.95e-14	chr6
platelet	457376	TN2_Transcription	-6.46286	1.96e-14	chr11
chronotype	1159640	TN2_Transcription	0.2684	1.96e-14	chr13
platelet	1124914	L1_Low_signal	24.9999	2.04e-14	chr12
height	1141344	TN2_Transcription	-2.83633	2.04e-14	chr12
height	330374	TN1_Transcription	-1.11517	2.08e-14	chr7
platelet	494938	TN4_Transcription	25.927	2.14e-14	chr12
BMD	662876	TN1_Transcription	0.0127726	2.15e-14	chr20
BMD	567904	TN1_Transcription	0.0160481	2.3e-14	chr16
rhinitis	262454	TN1_Transcription	-0.0713269	2.35e-14	chr6
height	485806	E8_Weak_multi-tissue	1.09146	2.37e-14	chr12
height	64338	CTCF_CTCF-Cohesin	-0.10051	2.41e-14	chr2
height	261920	TN4_Transcription	-0.896778	2.41e-14	chr6
height	218134	L1_Low_signal	-6.0805	2.48e-14	chr5
platelet	507330	TN3_Transcription	6.34825	2.55e-14	chr13
height	952738	E1_Stem_cell	1.47347	2.66e-14	chr6
FVC	930658	E5_B-cell-like	-0.0642779	2.66e-14	chr6
BMI	634568	TN4_Transcription	-1.82993	2.69e-14	chr19
BMD	134594	PC1_Polycomb_/_Heterochromatin	0.0627432	2.71e-14	chr3
height	379914	PC3_Polycomb	2.85446	2.71e-14	chr9
platelet	285590	E7_Monocyte_/_Macrophage	-10.3824	2.75e-14	chr6
SBP	316816	E2_Multi-tissue	0.535212	2.75e-14	chr7
SBP	1093512	L5_Low_signal	1.03684	2.76e-14	chr11
FVC	597976	TN1_Transcription	0.115929	2.77e-14	chr17
chronotype	1128038	L2_Low_signal	0.839221	2.86e-14	chr12
BMI	1015036	TN2_Transcription	1.04472	2.87e-14	chr8
height	240004	E12_Erythroblast-like	-0.583144	2.92e-14	chr5
height	904414	L6_Low_signal	-11.8225	2.96e-14	chr5
height	138812	TN1_Transcription	-0.455076	3.01e-14	chr3
platelet	300720	E1_Stem_cell	2.67412	3.05e-14	chr7
height	1196836	TN2_Transcription	-0.925204	3.15e-14	chr15
FVC	931700	TF1_NANOG_/_FOXA1	-1.49499	3.18e-14	chr6
height	126264	E8_Weak_multi-tissue	0.354475	3.3e-14	chr3
BMD	382714	PC2_Weak_Polycomb	-0.0389872	3.31e-14	chr9
height	327360	E8_Weak_multi-tissue	0.353688	3.33e-14	chr7
height	238444	P_Promoter	0.435047	3.34e-14	chr5
height	262996	TF2_CEBPB	-1.01851	3.38e-14	chr6
height	393592	P_Promoter	0.45031	3.43e-14	chr9
platelet	116644	TN4_Transcription	-9.33748	3.5e-14	chr2
platelet	67910	E7_Monocyte_/_Macrophage	18.3042	3.6e-14	chr2
BMD	1214878	HET2_Heterochromatin	-0.0145966	3.68e-14	chr16
BMI	110838	PC1_Polycomb_/_Heterochromatin	1.04349	3.7e-14	chr2
height	1059424	HET4_Heterochromatin	1.23086	4.01e-14	chr9
height	74782	E3_Brain_/_Melanocyte	0.510345	4.05e-14	chr2
height	230472	E3_Brain_/_Melanocyte	4.38821	4.05e-14	chr5
platelet	904414	L6_Low_signal	109.81	4.11e-14	chr5
height	1229550	TN2_Transcription	-2.51192	4.18e-14	chr17
height	567094	E2_Multi-tissue	-0.769153	4.22e-14	chr15
height	263054	P_Promoter	-0.421594	4.37e-14	chr6
height	497368	E3_Brain_/_Melanocyte	0.979638	4.4e-14	chr12
platelet	498570	CTCF_CTCF-Cohesin	-0.717913	4.57e-14	chr12
platelet	460030	E2_Multi-tissue	2.76655	4.57e-14	chr11
height	116130	E8_Weak_multi-tissue	3.7052	5.09e-14	chr2
platelet	461004	TN1_Transcription	23.5179	5.28e-14	chr11
SBP	247044	E2_Multi-tissue	-0.698525	5.33e-14	chr5
height	259330	P_Promoter	0.0782127	5.39e-14	chr6
height	1108030	TF4_OTX2	6.85467	5.66e-14	chr11
height	278846	TN1_Transcription	0.116709	5.67e-14	chr6
BMD	460762	TN1_Transcription	0.012985	5.74e-14	chr11
platelet	262128	PC2_Weak_Polycomb	8.92608	5.8e-14	chr6
height	765306	L3_Low_signal	-2.0961	5.84e-14	chr2
BMD	1000544	PC1_Polycomb_/_Heterochromatin	-0.0157661	5.85e-14	chr8
height	966034	TF3_FOXA1_/_AR_/_ESR1	-1.65914	6e-14	chr7
BMD	602652	E2_Multi-tissue	0.0194803	6.08e-14	chr17
height	280600	TN1_Transcription	1.25446	6.16e-14	chr6
platelet	1206408	PC2_Weak_Polycomb	80.8994	6.28e-14	chr16
platelet	494076	L4_Low_signal	-64.1603	6.49e-14	chr12
height	1057880	E6_Weak_epithelial	-0.585214	6.68e-14	chr9
height	1011032	HET1_Heterochromatin	0.738344	7.05e-14	chr8
height	535122	TF3_FOXA1_/_AR_/_ESR1	0.414114	7.24e-14	chr14
BMD	1064816	TF2_CEBPB	0.0420802	7.39e-14	chr9
height	120592	E6_Weak_epithelial	-2.15244	7.39e-14	chr2
height	283682	TN2_Transcription	-0.271407	7.67e-14	chr6
height	1178454	HET2_Heterochromatin	-0.986836	7.9e-14	chr14
SBP	334784	E1_Stem_cell	1.24619	7.96e-14	chr8
SBP	303028	PC4_Polycomb_/_Bivalent_stem_cell_Enh	2.39095	8.03e-14	chr7
height	273210	E8_Weak_multi-tissue	0.473002	8.51e-14	chr6
BMI	157486	TN2_Transcription	-1.05129	8.61e-14	chr3
platelet	494560	E1_Stem_cell	13.8792	8.64e-14	chr12
height	581910	TN1_Transcription	2.07829	8.67e-14	chr16
height	323720	E5_B-cell-like	0.459784	8.75e-14	chr7
menarche	276900	PC4_Polycomb_/_Bivalent_stem_cell_Enh	-0.119683	8.87e-14	chr6
BMD	965232	L2_Low_signal	-0.661353	9.4e-14	chr7
BMI	64402	PC1_Polycomb_/_Heterochromatin	1.1316	9.48e-14	chr2
height	582820	TN2_Transcription	-1.57117	9.5e-14	chr16
height	460820	L1_Low_signal	2.28179	9.83e-14	chr11
rhinitis	664614	HET1_Heterochromatin	-0.247623	9.86e-14	chr20
height	499092	TN1_Transcription	-0.61609	9.87e-14	chr12
height	955926	PC2_Weak_Polycomb	2.91194	9.92e-14	chr6
asthma	350832	L5_Low_signal	0.324251	1.03e-13	chr8
height	961796	L7_Low_signal	-4.78177	1.03e-13	chr6
height	781554	E1_Stem_cell	-10.85	1.04e-13	chr2
BMD	542708	TN3_Transcription	-0.0078958	1.05e-13	chr14
FVC	247206	E5_B-cell-like	-0.0189135	1.06e-13	chr5
BMD	787670	E1_Stem_cell	-0.141389	1.06e-13	chr2
menarche	1229858	PC1_Polycomb_/_Heterochromatin	-2.16359	1.07e-13	chr17
height	1218698	E6_Weak_epithelial	2.76971	1.07e-13	chr16
platelet	792422	L2_Low_signal	293.97	1.07e-13	chr2
height	219050	TF3_FOXA1_/_AR_/_ESR1	-1.12365	1.08e-13	chr5
SBP	443478	TN4_Transcription	6.6897	1.08e-13	chr11
height	264114	PC3_Polycomb	-0.848091	1.08e-13	chr6
BMD	259958	TF3_FOXA1_/_AR_/_ESR1	-0.0210044	1.09e-13	chr6
height	620582	L1_Low_signal	-25.7224	1.1e-13	chr18
menarche	1016252	L7_Low_signal	-1.64335	1.11e-13	chr8
platelet	247596	TN1_Transcription	4.1179	1.11e-13	chr5
height	589298	P_Promoter	-0.600383	1.11e-13	chr16
SBP	190984	E2_Multi-tissue	-0.727351	1.14e-13	chr4
chronotype	1128120	E8_Weak_multi-tissue	-0.234561	1.15e-13	chr12
height	308638	E2_Multi-tissue	0.437907	1.15e-13	chr7
rhinitis	913550	L1_Low_signal	-1.98806	1.16e-13	chr5
height	581850	E5_B-cell-like	0.788645	1.18e-13	chr16
height	388808	PC2_Weak_Polycomb	0.41113	1.19e-13	chr9
height	239738	E2_Multi-tissue	0.102228	1.2e-13	chr5
platelet	140328	TN3_Transcription	8.87045	1.24e-13	chr3
SBP	603026	E9_Liver_/_Intestine	1.07706	1.25e-13	chr17
height	584532	P_Promoter	-0.105587	1.32e-13	chr16
BMI	811830	CTCF_CTCF-Cohesin	0.153272	1.32e-13	chr3
BMI	70698	TN4_Transcription	-0.313363	1.33e-13	chr2
platelet	507186	E5_B-cell-like	-2.00737	1.34e-13	chr13
height	183918	TN2_Transcription	-1.15105	1.35e-13	chr4
platelet	542350	P_Promoter	-5.25366	1.35e-13	chr14
BMI	498272	TN4_Transcription	0.320773	1.38e-13	chr12
BMI	812540	TN2_Transcription	-0.501482	1.38e-13	chr3
height	77128	E7_Monocyte_/_Macrophage	0.443219	1.38e-13	chr2
rhinitis	198360	L5_Low_signal	0.582555	1.44e-13	chr4
height	828074	E9_Liver_/_Intestine	3.81357	1.45e-13	chr3
SBP	236562	E8_Weak_multi-tissue	-1.96212	1.47e-13	chr5
platelet	488964	TN3_Transcription	4.31291	1.48e-13	chr12
BMI	137436	TN2_Transcription	1.09974	1.52e-13	chr3
height	590220	TN1_Transcription	0.546376	1.52e-13	chr17
platelet	460098	CTCF_CTCF-Cohesin	2.17985	1.61e-13	chr11
rhinitis	1032306	HET3_Heterochromatin	3.51705	1.64e-13	chr9
height	603716	E8_Weak_multi-tissue	-0.265814	1.65e-13	chr17
chronotype	1126002	HET3_Heterochromatin	0.173857	1.66e-13	chr12
height	587276	E7_Monocyte_/_Macrophage	-0.454578	1.71e-13	chr16
height	752788	PC3_Polycomb	-5.45921	1.74e-13	chr2
rhinitis	481070	E5_B-cell-like	0.0564112	1.75e-13	chr12
height	1102024	HET4_Heterochromatin	-1.23621	1.76e-13	chr11
height	548494	TN4_Transcription	1.4155	1.82e-13	chr15
BMD	1000418	TF2_CEBPB	-0.0882819	1.82e-13	chr8
height	944330	E8_Weak_multi-tissue	1.02718	1.83e-13	chr6
BMI	1000476	E9_Liver_/_Intestine	-0.253695	1.83e-13	chr8
height	432380	PC4_Polycomb_/_Bivalent_stem_cell_Enh	2.30366	1.83e-13	chr11
height	260874	E3_Brain_/_Melanocyte	1.20522	1.83e-13	chr6
platelet	804630	PC2_Weak_Polycomb	83.2622	1.85e-13	chr3
platelet	112380	L3_Low_signal	-23.5246	1.88e-13	chr2
intelligence	137610	E4_Multi-tissue	0.120801	2.02e-13	chr3
chronotype	1127866	L2_Low_signal	-1.58321	2.03e-13	chr12
height	224820	E4_Multi-tissue	-0.116158	2.04e-13	chr5
chronotype	793668	PC3_Polycomb	0.134386	2.06e-13	chr2
platelet	261074	PC1_Polycomb_/_Heterochromatin	13.9079	2.14e-13	chr6
platelet	383248	L5_Low_signal	-9.00149	2.14e-13	chr9
height	436198	L4_Low_signal	0.795326	2.14e-13	chr11
FVC	930634	L3_Low_signal	-0.755922	2.17e-13	chr6
BMD	860090	L1_Low_signal	-0.560417	2.22e-13	chr4
SBP	583080	E3_Brain_/_Melanocyte	14.3269	2.24e-13	chr16
BMI	137610	E4_Multi-tissue	-0.154376	2.25e-13	chr3
asthma	481070	E5_B-cell-like	0.0749583	2.32e-13	chr12
height	464072	E2_Multi-tissue	-5.58809	2.33e-13	chr11
height	1139896	HET4_Heterochromatin	-0.428524	2.35e-13	chr12
platelet	371756	E8_Weak_multi-tissue	14.4914	2.36e-13	chr9
height	637278	TN1_Transcription	1.65884	2.39e-13	chr19
platelet	204004	E2_Multi-tissue	-2.02022	2.43e-13	chr4
BMD	1059180	HET2_Heterochromatin	-0.0247288	2.47e-13	chr9
BMI	335582	L5_Low_signal	-0.250205	2.51e-13	chr8
platelet	194934	E4_Multi-tissue	-4.85832	2.55e-13	chr4
platelet	394982	E4_Multi-tissue	1.02566	2.58e-13	chr9
height	569870	TN1_Transcription	0.535278	2.6e-13	chr16
height	294504	TF3_FOXA1_/_AR_/_ESR1	0.760258	2.62e-13	chr6
menarche	787410	E8_Weak_multi-tissue	0.641734	2.69e-13	chr2
FVC	262928	HET3_Heterochromatin	-0.110792	2.7e-13	chr6
BMI	641992	E2_Multi-tissue	0.20808	2.7e-13	chr19
menarche	1055742	TF2_CEBPB	-0.827969	2.74e-13	chr9
BMI	590300	PC2_Weak_Polycomb	-3.10421	2.74e-13	chr17
height	563116	TN1_Transcription	-0.209581	2.75e-13	chr15
platelet	647294	TN1_Transcription	-7.67569	2.75e-13	chr19
BMD	603034	PC2_Weak_Polycomb	-0.0141129	2.8e-13	chr17
height	379688	E2_Multi-tissue	-0.634071	2.82e-13	chr9
asthma	262110	TN1_Transcription	-0.581892	2.9e-13	chr6
height	595694	TN1_Transcription	0.265263	2.95e-13	chr17
height	754752	PC1_Polycomb_/_Heterochromatin	0.343903	2.95e-13	chr2
SBP	432280	PC1_Polycomb_/_Heterochromatin	-7.28689	2.96e-13	chr11
menarche	380746	CTCF_CTCF-Cohesin	0.0771497	2.96e-13	chr9
platelet	904900	L1_Low_signal	173.014	2.97e-13	chr5
height	582008	P_Promoter	0.183006	3.09e-13	chr16
height	1102334	L2_Low_signal	5.52005	3.09e-13	chr11
height	943472	L1_Low_signal	10.1284	3.28e-13	chr6
asthma	368186	TN3_Transcription	-0.782133	3.29e-13	chr9
FVC	930606	L2_Low_signal	-2.27922	3.29e-13	chr6
platelet	494404	PC1_Polycomb_/_Heterochromatin	-11.3662	3.31e-13	chr12
platelet	140158	E3_Brain_/_Melanocyte	7.9215	3.32e-13	chr3
height	219624	TN2_Transcription	-4.11464	3.34e-13	chr5
SBP	603594	E5_B-cell-like	-0.328598	3.35e-13	chr17
BMD	239230	E4_Multi-tissue	0.00362277	3.4e-13	chr5
menarche	137546	L3_Low_signal	1.77046	3.41e-13	chr3
height	203940	PC1_Polycomb_/_Heterochromatin	0.68355	3.51e-13	chr4
BMD	317776	E4_Multi-tissue	0.00749245	3.54e-13	chr7
platelet	127096	TN2_Transcription	-22.0787	3.58e-13	chr3
height	1200908	TN2_Transcription	-0.405015	3.67e-13	chr15
height	176042	TN3_Transcription	-1.87619	3.68e-13	chr4
SBP	575022	TN2_Transcription	-1.29864	3.8e-13	chr16
height	379874	E4_Multi-tissue	-0.120295	3.83e-13	chr9
rhinitis	110800	PC1_Polycomb_/_Heterochromatin	0.648176	3.97e-13	chr2
height	596458	P_Promoter	-0.0866289	4e-13	chr17
height	601182	TF3_FOXA1_/_AR_/_ESR1	0.54282	4e-13	chr17
height	178258	TN1_Transcription	1.29027	4.02e-13	chr4
chronotype	959088	L2_Low_signal	-1.25219	4.09e-13	chr6
menarche	1192362	PC3_Polycomb	6.29167	4.2e-13	chr15
height	654106	E10_Brain	4.43099	4.24e-13	chr20
height	339900	E2_Multi-tissue	-0.156563	4.38e-13	chr8
FVC	873504	HET2_Heterochromatin	-1.68224	4.43e-13	chr4
platelet	226998	TF3_FOXA1_/_AR_/_ESR1	1.15668	4.53e-13	chr5
BMI	70638	TN4_Transcription	-0.812847	4.58e-13	chr2
height	138004	E3_Brain_/_Melanocyte	-3.10872	4.66e-13	chr3
height	799214	TN4_Transcription	0.86852	4.71e-13	chr3
BMD	137938	TN1_Transcription	0.00690343	4.71e-13	chr3
chronotype	921226	L1_Low_signal	-1.22647	4.74e-13	chr5
rhinitis	90004	TN2_Transcription	0.730081	4.81e-13	chr2
FVC	195090	E2_Multi-tissue	0.153665	4.93e-13	chr4
rhinitis	110916	L5_Low_signal	0.028099	4.97e-13	chr2
height	77756	E7_Monocyte_/_Macrophage	-0.333775	5.07e-13	chr2
BMD	804392	L1_Low_signal	-0.218843	5.1e-13	chr3
height	448426	PC3_Polycomb	1.47159	5.29e-13	chr11
BMI	263788	TN3_Transcription	-0.831072	5.41e-13	chr6
menarche	544014	P_Promoter	0.16741	5.41e-13	chr15
platelet	225844	TN1_Transcription	5.50572	5.5e-13	chr5
platelet	1106184	L6_Low_signal	12.4012	5.59e-13	chr11
platelet	875054	PC2_Weak_Polycomb	6.36526	5.76e-13	chr4
BMI	1034746	L1_Low_signal	-5.74825	5.84e-13	chr9
height	598040	TN1_Transcription	2.23171	5.84e-13	chr17
height	931246	HET2_Heterochromatin	-1.90088	5.97e-13	chr6
height	532154	E10_Brain	0.632909	6.11e-13	chr14
height	437232	TN2_Transcription	-0.836421	6.19e-13	chr11
height	382326	E12_Erythroblast-like	-1.55552	6.43e-13	chr9
platelet	123746	TN1_Transcription	3.73988	6.49e-13	chr2
chronotype	1127630	HET2_Heterochromatin	1.635	6.49e-13	chr12
height	246712	E11_T-cell	-0.349578	6.53e-13	chr5
height	639500	TN1_Transcription	-0.485754	6.6e-13	chr19
platelet	585628	E2_Multi-tissue	3.64561	6.72e-13	chr16
platelet	640546	E5_B-cell-like	7.64975	6.75e-13	chr19
BMI	137684	TN3_Transcription	-0.285561	6.8e-13	chr3
chronotype	396324	E3_Brain_/_Melanocyte	0.120232	7.04e-13	chr9
BMI	805328	PC3_Polycomb	-5.62987	7.2e-13	chr3
height	1102226	HET2_Heterochromatin	-2.82681	7.31e-13	chr11
chronotype	1222156	PC1_Polycomb_/_Heterochromatin	0.237893	7.76e-13	chr17
SBP	115408	P_Promoter	-0.853865	7.76e-13	chr2
platelet	494172	PC1_Polycomb_/_Heterochromatin	-47.9535	7.78e-13	chr12
platelet	933208	E8_Weak_multi-tissue	-22.4739	7.9e-13	chr6
asthma	275430	TN2_Transcription	-0.39625	8e-13	chr6
height	282736	CTCF_CTCF-Cohesin	0.163988	8.07e-13	chr6
BMI	1206420	L1_Low_signal	7.88673	8.18e-13	chr16
height	560600	E11_T-cell	-0.43651	8.58e-13	chr15
chronotype	1127758	HET2_Heterochromatin	-0.422072	8.82e-13	chr12
FVC	261064	L3_Low_signal	-0.483447	9.04e-13	chr6
height	137416	P_Promoter	-0.226454	9.08e-13	chr3
BMI	119742	E1_Stem_cell	0.661323	9.1e-13	chr2
BMI	263652	TN3_Transcription	1.25992	9.36e-13	chr6
BMD	306264	CTCF_CTCF-Cohesin	-0.0182244	9.4e-13	chr7
height	1102176	HET2_Heterochromatin	-4.09678	9.46e-13	chr11
intelligence	137700	TN1_Transcription	0.402146	9.63e-13	chr3
height	359054	E3_Brain_/_Melanocyte	-1.17636	9.74e-13	chr8
platelet	453072	TN1_Transcription	-1.92597	9.76e-13	chr11
height	308722	L2_Low_signal	6.00293	9.77e-13	chr7
height	268494	TF1_NANOG_/_FOXA1	-0.7361	1e-12	chr6
height	230512	E1_Stem_cell	0.720584	1.04e-12	chr5
height	1282078	E1_Stem_cell	-1.4682	1.04e-12	chr21
height	586432	TN3_Transcription	0.451636	1.04e-12	chr16
platelet	587624	TN1_Transcription	4.58349	1.04e-12	chr16
platelet	366016	P_Promoter	2.74311	1.04e-12	chr8
rhinitis	913498	E9_Liver_/_Intestine	1.65663	1.07e-12	chr5
height	583026	L5_Low_signal	1.232	1.09e-12	chr16
height	262880	PC4_Polycomb_/_Bivalent_stem_cell_Enh	-1.37851	1.11e-12	chr6
platelet	238842	E12_Erythroblast-like	17.1501	1.11e-12	chr5
platelet	153772	PC3_Polycomb	31.741	1.11e-12	chr3
height	1229214	E1_Stem_cell	0.294263	1.11e-12	chr17
height	510608	E3_Brain_/_Melanocyte	3.76674	1.13e-12	chr13
FVC	620678	TN1_Transcription	0.108588	1.13e-12	chr18
platelet	139894	TN2_Transcription	-23.6426	1.14e-12	chr3
rhinitis	642886	CTCF_CTCF-Cohesin	0.344409	1.16e-12	chr19
height	574994	TN2_Transcription	6.78507	1.16e-12	chr16
height	261816	P_Promoter	0.113145	1.17e-12	chr6
height	1229458	TF3_FOXA1_/_AR_/_ESR1	22.8478	1.17e-12	chr17
BMD	220544	E1_Stem_cell	0.12552	1.18e-12	chr5
chronotype	85762	L4_Low_signal	0.13702	1.18e-12	chr2
height	239870	E2_Multi-tissue	0.278769	1.18e-12	chr5
height	70960	CTCF_CTCF-Cohesin	-0.710778	1.19e-12	chr2
height	560458	L5_Low_signal	0.211775	1.2e-12	chr15
SBP	1229628	TN4_Transcription	-7.70284	1.21e-12	chr17
height	281034	TN3_Transcription	1.19768	1.22e-12	chr6
height	1057844	HET2_Heterochromatin	-3.13373	1.24e-12	chr9
BMD	1116910	PC3_Polycomb	0.0302228	1.24e-12	chr11
height	71854	TN4_Transcription	-0.350257	1.25e-12	chr2
menarche	935546	PC2_Weak_Polycomb	-0.386118	1.26e-12	chr6
platelet	446070	E2_Multi-tissue	-0.955306	1.26e-12	chr11
height	501642	L4_Low_signal	0.767343	1.3e-12	chr13
platelet	83632	E3_Brain_/_Melanocyte	-8.28187	1.3e-12	chr2
height	604294	E1_Stem_cell	0.959905	1.3e-12	chr17
BMI	370084	E2_Multi-tissue	0.158696	1.31e-12	chr9
height	554834	TN1_Transcription	-0.779646	1.34e-12	chr15
height	582584	E5_B-cell-like	0.0496456	1.35e-12	chr16
SBP	655622	L1_Low_signal	23.2387	1.36e-12	chr20
height	136690	E1_Stem_cell	-1.25112	1.37e-12	chr3
intelligence	194984	TN1_Transcription	0.163681	1.39e-12	chr4
BMI	233482	E6_Weak_epithelial	-0.554453	1.4e-12	chr5
FVC	1247402	HET3_Heterochromatin	-0.327764	1.41e-12	chr18
BMI	137318	TN1_Transcription	0.799064	1.42e-12	chr3
platelet	164450	E7_Monocyte_/_Macrophage	-18.5003	1.44e-12	chr3
height	956890	L4_Low_signal	-0.830659	1.46e-12	chr6
height	273842	TN4_Transcription	0.531332	1.48e-12	chr6
platelet	140208	E2_Multi-tissue	39.4882	1.52e-12	chr3
height	277302	TN2_Transcription	-0.233314	1.53e-12	chr6
BMD	1014522	HET1_Heterochromatin	0.217396	1.53e-12	chr8
height	1102106	PC2_Weak_Polycomb	-6.22546	1.55e-12	chr11
rhinitis	263154	E1_Stem_cell	0.169195	1.58e-12	chr6
chronotype	578904	E4_Multi-tissue	-0.0108529	1.59e-12	chr16
platelet	443262	TN1_Transcription	-11.1594	1.62e-12	chr11
BMD	335748	TN1_Transcription	-0.0125512	1.63e-12	chr8
BMI	157328	L5_Low_signal	5.30084	1.65e-12	chr3
asthma	198464	L5_Low_signal	-5.65771	1.65e-12	chr4
platelet	83836	E7_Monocyte_/_Macrophage	2.53445	1.66e-12	chr2
height	665794	E5_B-cell-like	-0.190143	1.66e-12	chr20
height	221500	TN2_Transcription	-1.9781	1.68e-12	chr5
height	566710	TN3_Transcription	0.581789	1.68e-12	chr15
menarche	1055704	TF1_NANOG_/_FOXA1	4.28043	1.68e-12	chr9
FVC	300764	E7_Monocyte_/_Macrophage	0.137984	1.72e-12	chr7
height	967198	PC1_Polycomb_/_Heterochromatin	-1.15751	1.72e-12	chr7
height	1030978	HET3_Heterochromatin	-2.65122	1.74e-12	chr8
height	564660	TN3_Transcription	-0.995583	1.74e-12	chr15
FVC	534546	E1_Stem_cell	-0.154523	1.75e-12	chr14
height	640628	L5_Low_signal	-0.278343	1.75e-12	chr19
BMI	1037718	L1_Low_signal	-6.57381	1.76e-12	chr9
height	496408	TN1_Transcription	-2.10244	1.77e-12	chr12
platelet	112420	L4_Low_signal	49.3089	1.79e-12	chr2
platelet	1182574	HET2_Heterochromatin	-7.49011	1.79e-12	chr14
height	620546	E5_B-cell-like	0.162024	1.8e-12	chr18
asthma	913670	HET2_Heterochromatin	-3.6623	1.81e-12	chr5
FVC	261904	E12_Erythroblast-like	0.0587668	1.81e-12	chr6
height	127778	TN4_Transcription	0.408329	1.83e-12	chr3
intelligence	276526	E1_Stem_cell	-0.555328	1.89e-12	chr6
platelet	478902	TN2_Transcription	1.78016	1.89e-12	chr12
height	70480	PC1_Polycomb_/_Heterochromatin	-0.745375	1.91e-12	chr2
FVC	261396	HET1_Heterochromatin	0.05706	1.94e-12	chr6
FVC	435548	E1_Stem_cell	0.118272	1.94e-12	chr11
BMI	614660	TN3_Transcription	0.413292	1.95e-12	chr17
platelet	101484	TN2_Transcription	10.0132	1.96e-12	chr2
height	560532	E2_Multi-tissue	0.820415	1.98e-12	chr15
FVC	261846	TF2_CEBPB	-0.37122	2.01e-12	chr6
BMD	1093390	L1_Low_signal	-0.664851	2.06e-12	chr11
height	268410	P_Promoter	-0.0828566	2.08e-12	chr6
menarche	846930	TF1_NANOG_/_FOXA1	-0.466328	2.08e-12	chr4
height	436254	E12_Erythroblast-like	1.63403	2.1e-12	chr11
height	302018	E4_Multi-tissue	0.415115	2.12e-12	chr7
height	450218	TN1_Transcription	-1.12456	2.12e-12	chr11
height	127582	PC1_Polycomb_/_Heterochromatin	-6.19261	2.13e-12	chr3
BMD	654466	HET4_Heterochromatin	0.0092393	2.14e-12	chr20
BMD	434106	E7_Monocyte_/_Macrophage	0.0435215	2.19e-12	chr11
BMI	823728	L4_Low_signal	-1.11331	2.21e-12	chr3
platelet	389620	TF1_NANOG_/_FOXA1	206.176	2.21e-12	chr9
height	1062868	TF1_NANOG_/_FOXA1	-0.606048	2.22e-12	chr9
height	1062924	HET1_Heterochromatin	1.5666	2.24e-12	chr9
BMI	370014	P_Promoter	0.182192	2.24e-12	chr9
height	262064	PC4_Polycomb_/_Bivalent_stem_cell_Enh	0.477149	2.26e-12	chr6
height	1229686	E7_Monocyte_/_Macrophage	-0.839043	2.27e-12	chr17
height	219710	HET2_Heterochromatin	-4.19212	2.28e-12	chr5
height	668558	L5_Low_signal	0.699878	2.28e-12	chr20
height	603794	P_Promoter	0.0563597	2.3e-12	chr17
FVC	447096	TN1_Transcription	-0.419486	2.32e-12	chr11
platelet	394630	PC1_Polycomb_/_Heterochromatin	-14.7139	2.33e-12	chr9
SBP	603078	PC2_Weak_Polycomb	7.46091	2.39e-12	chr17
height	781876	HET4_Heterochromatin	0.268725	2.39e-12	chr2
rhinitis	181632	E5_B-cell-like	0.0511425	2.39e-12	chr4
height	136844	TN2_Transcription	3.34348	2.44e-12	chr3
height	124076	L5_Low_signal	0.590195	2.44e-12	chr2
height	310638	TN1_Transcription	-0.194112	2.46e-12	chr7
height	907700	HET3_Heterochromatin	20.5227	2.46e-12	chr5
FVC	445466	TN1_Transcription	0.305719	2.47e-12	chr11
FVC	263008	TN1_Transcription	-0.0229706	2.49e-12	chr6
BMI	460958	E3_Brain_/_Melanocyte	0.489433	2.51e-12	chr11
asthma	571232	TN3_Transcription	0.369907	2.51e-12	chr16
height	983640	L7_Low_signal	49.6235	2.52e-12	chr7
BMI	753604	E1_Stem_cell	-7.46026	2.52e-12	chr2
height	478784	E5_B-cell-like	0.351261	2.53e-12	chr12
height	202104	TN2_Transcription	0.411555	2.55e-12	chr4
height	530030	E1_Stem_cell	1.85447	2.56e-12	chr14
SBP	668652	PC1_Polycomb_/_Heterochromatin	-14.9327	2.61e-12	chr20
FVC	660930	PC3_Polycomb	3.48114	2.61e-12	chr20
menarche	582946	E11_T-cell	-0.363118	2.62e-12	chr16
platelet	116702	TN1_Transcription	-12.8118	2.68e-12	chr2
platelet	457480	TN1_Transcription	13.1465	2.72e-12	chr11
height	292408	P_Promoter	-0.215611	2.74e-12	chr6
platelet	1206814	E2_Multi-tissue	16.8052	2.76e-12	chr16
intelligence	137748	PC1_Polycomb_/_Heterochromatin	1.01881	2.76e-12	chr3
BMD	228526	L5_Low_signal	-0.00740801	2.76e-12	chr5
BMI	466182	TN2_Transcription	-0.48913	2.82e-12	chr12
menarche	192722	E5_B-cell-like	0.0277651	2.86e-12	chr4
BMI	583020	TN1_Transcription	0.277665	2.86e-12	chr16
FVC	132502	PC3_Polycomb	-0.234605	2.88e-12	chr3
menarche	277304	TF1_NANOG_/_FOXA1	-2.25667	2.91e-12	chr6
height	116470	PC3_Polycomb	2.19064	2.95e-12	chr2
BMD	642850	CTCF_CTCF-Cohesin	0.00262422	2.98e-12	chr19
height	639874	E11_T-cell	0.0825692	3.02e-12	chr19
platelet	356602	E8_Weak_multi-tissue	-26.5517	3.04e-12	chr8
platelet	532710	TN4_Transcription	-34.8933	3.08e-12	chr14
height	763378	L1_Low_signal	-63.7065	3.1e-12	chr2
height	118302	TN1_Transcription	1.58826	3.11e-12	chr2
platelet	907532	TF2_CEBPB	25.9249	3.12e-12	chr5
platelet	468200	E8_Weak_multi-tissue	-86.8433	3.2e-12	chr12
height	1065046	HET1_Heterochromatin	0.407714	3.23e-12	chr9
BMI	135510	P_Promoter	-0.105424	3.3e-12	chr3
height	150456	PC2_Weak_Polycomb	-0.408453	3.31e-12	chr3
BMD	444618	L4_Low_signal	-0.0204929	3.31e-12	chr11
height	1195842	E3_Brain_/_Melanocyte	6.51604	3.31e-12	chr15
height	1102542	PC3_Polycomb	9.73549	3.35e-12	chr11
asthma	124332	TN4_Transcription	-1.1505	3.37e-12	chr2
BMI	487978	E4_Multi-tissue	0.355976	3.38e-12	chr12
BMD	660612	E5_B-cell-like	-0.00700549	3.4e-12	chr20
FVC	582834	L3_Low_signal	-0.369863	3.42e-12	chr16
platelet	225742	E4_Multi-tissue	1.68544	3.43e-12	chr5
SBP	247206	E5_B-cell-like	-0.289865	3.5e-12	chr5
platelet	436956	PC3_Polycomb	3.57896	3.52e-12	chr11
BMI	542356	TN2_Transcription	0.203902	3.57e-12	chr14
height	183864	TN1_Transcription	-0.203599	3.66e-12	chr4
FVC	227576	TN4_Transcription	0.259647	3.69e-12	chr5
height	381810	E5_B-cell-like	0.155857	3.69e-12	chr9
height	443366	TN3_Transcription	-2.6164	3.71e-12	chr11
SBP	164526	PC3_Polycomb	-5.01001	3.71e-12	chr3
BMD	927180	E8_Weak_multi-tissue	0.0105234	3.82e-12	chr6
BMD	605876	TF1_NANOG_/_FOXA1	0.11484	3.84e-12	chr17
platelet	285656	L6_Low_signal	-62.9857	3.96e-12	chr6
FVC	106290	P_Promoter	0.0309615	4e-12	chr2
height	568216	PC2_Weak_Polycomb	0.206859	4e-12	chr16
FVC	261714	P_Promoter	0.0132815	4.01e-12	chr6
platelet	193616	TF2_CEBPB	-25.2798	4.02e-12	chr4
height	1101950	HET1_Heterochromatin	-3.34556	4.03e-12	chr11
height	1133216	TF2_CEBPB	-21.0766	4.05e-12	chr12
BMI	107182	TF3_FOXA1_/_AR_/_ESR1	-0.273337	4.13e-12	chr2
platelet	314478	E4_Multi-tissue	1.954	4.16e-12	chr7
FVC	660742	TN1_Transcription	-0.165471	4.21e-12	chr20
platelet	578766	TN1_Transcription	20.9861	4.26e-12	chr16
BMI	1026208	E3_Brain_/_Melanocyte	1.6101	4.27e-12	chr8
FVC	930878	PC3_Polycomb	-0.66845	4.34e-12	chr6
height	1057806	TF2_CEBPB	1.18463	4.34e-12	chr9
height	607958	TN1_Transcription	1.27348	4.34e-12	chr17
menarche	1231244	HET3_Heterochromatin	-1.91954	4.38e-12	chr17
height	382438	TF2_CEBPB	5.05941	4.39e-12	chr9
platelet	1108256	TN3_Transcription	-7.75033	4.44e-12	chr11
BMD	542802	CTCF_CTCF-Cohesin	-0.0320181	4.46e-12	chr14
asthma	262282	TN1_Transcription	0.411526	4.53e-12	chr6
height	763136	L2_Low_signal	-46.8711	4.56e-12	chr2
height	491338	TN2_Transcription	0.702397	4.59e-12	chr12
height	666100	TN3_Transcription	-2.85819	4.59e-12	chr20
height	273570	E6_Weak_epithelial	-0.397009	4.62e-12	chr6
menarche	137700	TN1_Transcription	-0.234146	4.63e-12	chr3
height	651620	TN1_Transcription	-0.722867	4.71e-12	chr19
height	477970	TN1_Transcription	0.948804	4.72e-12	chr12
height	746696	TF2_CEBPB	-2.80454	4.74e-12	chr2
BMD	1094290	L4_Low_signal	0.0162353	4.79e-12	chr11
menarche	154996	CTCF_CTCF-Cohesin	0.329599	4.79e-12	chr3
height	491578	E9_Liver_/_Intestine	-0.307901	4.8e-12	chr12
BMI	861996	HET4_Heterochromatin	-2.8749	4.94e-12	chr4
platelet	542192	TN4_Transcription	12.1106	4.95e-12	chr14
platelet	1133072	L3_Low_signal	-18.5717	4.98e-12	chr12
intelligence	930756	HET2_Heterochromatin	-9.00908	4.99e-12	chr6
SBP	780168	E11_T-cell	2.52742	5.02e-12	chr2
height	155594	TN4_Transcription	0.462674	5.03e-12	chr3
BMD	602584	E9_Liver_/_Intestine	-0.00574785	5.08e-12	chr17
FVC	474214	E6_Weak_epithelial	0.0293861	5.11e-12	chr12
platelet	659490	TN4_Transcription	-22.7515	5.16e-12	chr20
BMI	334854	TN3_Transcription	0.544452	5.19e-12	chr8
menarche	979278	PC3_Polycomb	4.49883	5.2e-12	chr7
platelet	833492	TF4_OTX2	-3.91704	5.27e-12	chr3
height	137260	TN4_Transcription	1.11641	5.33e-12	chr3
menarche	387048	TN2_Transcription	-0.783651	5.59e-12	chr9
intelligence	799216	L4_Low_signal	1.79662	5.62e-12	chr3
platelet	1032150	E7_Monocyte_/_Macrophage	17.9934	5.62e-12	chr9
height	567222	P_Promoter	-0.156927	5.67e-12	chr15
BMD	236708	TN2_Transcription	0.0222646	5.72e-12	chr5
platelet	174496	PC4_Polycomb_/_Bivalent_stem_cell_Enh	-11.1425	5.79e-12	chr4
BMI	523296	E6_Weak_epithelial	-1.84035	5.87e-12	chr14
BMD	191686	HET4_Heterochromatin	0.011187	5.91e-12	chr4
height	1117740	TN3_Transcription	1.11482	5.92e-12	chr11
height	224772	L5_Low_signal	-0.505511	5.93e-12	chr5
asthma	198454	TN1_Transcription	-1.98843	6.04e-12	chr4
menarche	192680	TN4_Transcription	-0.138385	6.05e-12	chr4
height	532212	TN3_Transcription	-1.52196	6.1e-12	chr14
BMI	335488	E6_Weak_epithelial	0.333538	6.1e-12	chr8
height	436138	L5_Low_signal	-0.30755	6.12e-12	chr11
height	230028	L1_Low_signal	26.043	6.19e-12	chr5
platelet	238902	TN3_Transcription	-11.9374	6.29e-12	chr5
FVC	262790	PC1_Polycomb_/_Heterochromatin	-0.103908	6.31e-12	chr6
platelet	477462	HET4_Heterochromatin	36.1497	6.32e-12	chr12
SBP	1102128	L2_Low_signal	40.6732	6.51e-12	chr11
platelet	375910	E9_Liver_/_Intestine	18.5452	6.58e-12	chr9
height	136580	TN2_Transcription	2.9474	6.62e-12	chr3
height	804476	TF4_OTX2	0.761124	6.64e-12	chr3
FVC	896890	E8_Weak_multi-tissue	0.449515	6.67e-12	chr5
rhinitis	275482	E2_Multi-tissue	0.0628209	6.72e-12	chr6
BMI	539388	E12_Erythroblast-like	-1.0442	6.83e-12	chr14
menarche	1215042	L3_Low_signal	-0.607906	6.85e-12	chr16
asthma	132538	TN1_Transcription	-0.125318	6.88e-12	chr3
BMI	89210	E6_Weak_epithelial	0.237143	6.9e-12	chr2
BMI	276526	E1_Stem_cell	0.691121	7e-12	chr6
height	198640	TN2_Transcription	0.862762	7.08e-12	chr4
platelet	480348	P_Promoter	0.423665	7.11e-12	chr12
rhinitis	913730	PC2_Weak_Polycomb	0.216335	7.15e-12	chr5
height	1219120	HET1_Heterochromatin	-1.30781	7.17e-12	chr16
height	828268	E8_Weak_multi-tissue	-0.295858	7.18e-12	chr3
platelet	1215266	TN2_Transcription	6.67697	7.35e-12	chr16
height	634604	P_Promoter	-0.126651	7.36e-12	chr19
height	955210	E1_Stem_cell	13.76	7.44e-12	chr6
BMI	1151584	L6_Low_signal	-1.68294	7.48e-12	chr13
menarche	80988	TN2_Transcription	0.495024	7.48e-12	chr2
height	944230	L5_Low_signal	1.83419	7.52e-12	chr6
height	183754	PC4_Polycomb_/_Bivalent_stem_cell_Enh	-0.788275	7.56e-12	chr4
SBP	205060	L6_Low_signal	-8.11414	7.59e-12	chr4
BMI	1013622	E2_Multi-tissue	0.782269	7.66e-12	chr8
height	498204	TN4_Transcription	-4.0955	7.81e-12	chr12
BMI	334740	PC1_Polycomb_/_Heterochromatin	-1.22277	7.91e-12	chr8
FVC	660828	TF2_CEBPB	-0.689569	7.93e-12	chr20
SBP	1102068	L2_Low_signal	-44.546	7.94e-12	chr11
height	663948	E5_B-cell-like	0.481142	7.95e-12	chr20
BMI	334784	E1_Stem_cell	0.282249	7.98e-12	chr8
menarche	625620	PC2_Weak_Polycomb	0.184357	7.98e-12	chr18
height	211656	P_Promoter	-0.0422653	8.18e-12	chr5
BMD	335480	L3_Low_signal	0.0961183	8.27e-12	chr8
height	646604	PC1_Polycomb_/_Heterochromatin	-0.923061	8.47e-12	chr19
chronotype	921152	E3_Brain_/_Melanocyte	-1.51876	8.57e-12	chr5
height	71782	TN4_Transcription	0.587939	8.6e-12	chr2
chronotype	1127690	HET2_Heterochromatin	0.365844	8.65e-12	chr12
BMI	357916	E8_Weak_multi-tissue	0.971551	8.69e-12	chr8
height	917810	HET1_Heterochromatin	1.40233	8.71e-12	chr5
BMI	334514	TN4_Transcription	0.46699	8.73e-12	chr8
asthma	764418	E8_Weak_multi-tissue	-0.37628	8.73e-12	chr2
height	238428	E3_Brain_/_Melanocyte	-1.49467	8.86e-12	chr5
chronotype	907516	E3_Brain_/_Melanocyte	-0.80298	8.87e-12	chr5
menarche	1055366	L2_Low_signal	-2.38022	8.87e-12	chr9
height	118360	E4_Multi-tissue	1.34981	8.92e-12	chr2
height	231694	L6_Low_signal	-0.79718	8.93e-12	chr5
height	339238	P_Promoter	0.25765	9.01e-12	chr8
height	504192	P_Promoter	0.0739531	9.02e-12	chr13
BMI	792634	PC2_Weak_Polycomb	-0.475361	9.04e-12	chr2
height	106426	E4_Multi-tissue	-0.10645	9.23e-12	chr2
asthma	166384	TN3_Transcription	0.15479	9.3e-12	chr3
height	365662	P_Promoter	0.0232821	9.31e-12	chr8
platelet	226866	TN2_Transcription	-4.37367	9.32e-12	chr5
FVC	262442	E2_Multi-tissue	-0.0291651	9.42e-12	chr6
platelet	804594	CTCF_CTCF-Cohesin	4.50338	9.43e-12	chr3
height	584624	TN2_Transcription	-0.291198	9.43e-12	chr16
BMI	1176802	E3_Brain_/_Melanocyte	1.82064	9.45e-12	chr14
height	548428	TN1_Transcription	0.648451	9.5e-12	chr15
height	498386	TN4_Transcription	-1.80098	9.58e-12	chr12
platelet	575908	TN1_Transcription	20.3645	9.72e-12	chr16
BMI	157412	TN1_Transcription	0.38491	9.73e-12	chr3
height	255710	HET1_Heterochromatin	-0.823488	9.75e-12	chr6
platelet	481274	TN4_Transcription	29.4744	1.01e-11	chr12
platelet	79624	E2_Multi-tissue	10.0582	1.01e-11	chr2
BMD	111204	P_Promoter	-0.0227617	1.02e-11	chr2
menarche	773044	E11_T-cell	-0.0310398	1.04e-11	chr2
BMI	110904	TF4_OTX2	0.639533	1.04e-11	chr2
platelet	312552	TN4_Transcription	-3.57923	1.05e-11	chr7
height	76752	E4_Multi-tissue	-0.153422	1.05e-11	chr2
FVC	660990	TN1_Transcription	0.437995	1.05e-11	chr20
asthma	262552	PC1_Polycomb_/_Heterochromatin	0.106373	1.06e-11	chr6
height	88600	TF1_NANOG_/_FOXA1	0.684041	1.07e-11	chr2
height	896432	L2_Low_signal	-10.7205	1.08e-11	chr5
height	1105808	L2_Low_signal	13.6135	1.09e-11	chr11
height	532272	L5_Low_signal	1.10779	1.09e-11	chr14
height	328800	TN3_Transcription	-0.201998	1.09e-11	chr7
height	76118	E2_Multi-tissue	-0.312179	1.1e-11	chr2
platelet	167020	TN2_Transcription	15.1545	1.11e-11	chr3
height	904448	TN3_Transcription	0.704959	1.11e-11	chr5
height	385310	L5_Low_signal	2.31873	1.14e-11	chr9
height	327446	E2_Multi-tissue	-0.173272	1.17e-11	chr7
intelligence	931254	HET2_Heterochromatin	0.394623	1.17e-11	chr6
BMI	904606	E6_Weak_epithelial	-0.364346	1.19e-11	chr5
platelet	531410	TN4_Transcription	-2.93292	1.22e-11	chr14
height	308600	PC1_Polycomb_/_Heterochromatin	2.94769	1.23e-11	chr7
BMD	551758	PC3_Polycomb	-0.0236283	1.27e-11	chr15
height	542234	PC1_Polycomb_/_Heterochromatin	1.99891	1.27e-11	chr14
platelet	394582	PC4_Polycomb_/_Bivalent_stem_cell_Enh	11.1594	1.28e-11	chr9
BMI	1015844	L2_Low_signal	-15.1573	1.28e-11	chr8
platelet	584642	TN1_Transcription	4.1264	1.31e-11	chr16
FVC	162868	E5_B-cell-like	0.043031	1.36e-11	chr3
intelligence	262128	PC2_Weak_Polycomb	-0.501333	1.37e-11	chr6
BMI	1000460	TF2_CEBPB	5.36709	1.38e-11	chr8
SBP	1101970	PC1_Polycomb_/_Heterochromatin	5.37721	1.39e-11	chr11
menarche	277054	PC2_Weak_Polycomb	-0.256645	1.4e-11	chr6
height	583480	P_Promoter	-0.264957	1.41e-11	chr16
BMD	453486	E3_Brain_/_Melanocyte	-0.0231148	1.41e-11	chr11
height	86802	CTCF_CTCF-Cohesin	0.204531	1.42e-11	chr2
height	203980	E1_Stem_cell	1.13379	1.43e-11	chr4
height	669816	TN1_Transcription	0.341124	1.45e-11	chr20
menarche	146086	E2_Multi-tissue	-0.0551375	1.46e-11	chr3
chronotype	1126114	HET1_Heterochromatin	0.124562	1.49e-11	chr12
height	803762	PC2_Weak_Polycomb	-4.79185	1.49e-11	chr3
height	1270238	TF3_FOXA1_/_AR_/_ESR1	2.64452	1.5e-11	chr20
menarche	100168	TN3_Transcription	0.657116	1.57e-11	chr2
chronotype	1125744	L2_Low_signal	2.49144	1.57e-11	chr12
platelet	112588	TN4_Transcription	-12.6778	1.59e-11	chr2
height	323758	HET2_Heterochromatin	0.939404	1.6e-11	chr7
SBP	1102234	HET2_Heterochromatin	9.91876	1.61e-11	chr11
height	442728	TN2_Transcription	-7.90551	1.63e-11	chr11
rhinitis	787168	E9_Liver_/_Intestine	0.752421	1.64e-11	chr2
BMD	768688	E3_Brain_/_Melanocyte	-0.0836153	1.66e-11	chr2
BMI	551870	P_Promoter	-1.22003	1.66e-11	chr15
height	382876	TN2_Transcription	-0.741969	1.69e-11	chr9
rhinitis	262618	TN1_Transcription	-0.428329	1.71e-11	chr6
height	932826	E10_Brain	-1.26763	1.73e-11	chr6
BMI	561406	PC3_Polycomb	1.58276	1.75e-11	chr15
BMD	262022	E2_Multi-tissue	0.000931311	1.79e-11	chr6
rhinitis	152648	HET1_Heterochromatin	-0.224472	1.82e-11	chr3
BMI	380746	CTCF_CTCF-Cohesin	-0.151315	1.84e-11	chr9
BMI	261046	TF5_AR	-0.921772	1.85e-11	chr6
height	1231756	TN4_Transcription	-1.42896	1.85e-11	chr17
height	521168	TN1_Transcription	0.641733	1.86e-11	chr13
FVC	162844	TN3_Transcription	0.394911	1.92e-11	chr3
height	1240292	HET2_Heterochromatin	1.21679	1.93e-11	chr18
BMD	349132	E4_Multi-tissue	0.0140617	1.93e-11	chr8
BMI	110944	E5_B-cell-like	0.281331	1.93e-11	chr2
height	482736	TN1_Transcription	-0.342489	1.93e-11	chr12
platelet	198836	E7_Monocyte_/_Macrophage	-1.41889	1.94e-11	chr4
height	582060	TN4_Transcription	0.524522	1.94e-11	chr16
platelet	364972	L3_Low_signal	46.6755	1.94e-11	chr8
height	957604	L5_Low_signal	3.81486	1.95e-11	chr6
height	120748	PC1_Polycomb_/_Heterochromatin	-1.39493	1.96e-11	chr2
FVC	147366	TN3_Transcription	-0.382484	1.97e-11	chr3
rhinitis	931770	TF2_CEBPB	-0.166974	1.98e-11	chr6
height	261612	TN1_Transcription	-0.520126	1.98e-11	chr6
BMD	442924	TN1_Transcription	0.0409511	2.05e-11	chr11
height	382834	E6_Weak_epithelial	-0.240136	2.18e-11	chr9
SBP	1116078	TN3_Transcription	-5.96662	2.23e-11	chr11
menarche	1033742	HET1_Heterochromatin	0.656019	2.29e-11	chr9
height	327970	TN1_Transcription	0.729534	2.33e-11	chr7
height	919640	E6_Weak_epithelial	-0.127245	2.34e-11	chr5
height	211598	TN4_Transcription	0.694432	2.37e-11	chr5
height	592592	L3_Low_signal	-4.10259	2.37e-11	chr17
BMI	230174	E4_Multi-tissue	-0.499997	2.37e-11	chr5
BMI	842064	L4_Low_signal	-6.4127	2.37e-11	chr4
platelet	155192	PC3_Polycomb	-51.7531	2.41e-11	chr3
height	562966	TN4_Transcription	0.598767	2.41e-11	chr15
chronotype	750410	E4_Multi-tissue	0.0181093	2.43e-11	chr2
platelet	555928	TN3_Transcription	-32.513	2.43e-11	chr15
height	582644	L5_Low_signal	-0.589167	2.46e-11	chr16
BMI	194354	E1_Stem_cell	-0.993369	2.46e-11	chr4
chronotype	1127546	L2_Low_signal	-3.03431	2.5e-11	chr12
SBP	494614	E1_Stem_cell	0.947267	2.55e-11	chr12
height	151066	L1_Low_signal	-40.2786	2.58e-11	chr3
platelet	101642	E2_Multi-tissue	-11.8226	2.62e-11	chr2
BMI	960710	TN2_Transcription	-1.05532	2.63e-11	chr6
platelet	1268972	HET2_Heterochromatin	-37.7666	2.64e-11	chr20
BMD	752600	TN2_Transcription	0.118533	2.65e-11	chr2
height	566782	E4_Multi-tissue	0.117604	2.65e-11	chr15
SBP	82268	P_Promoter	-0.916825	2.7e-11	chr2
menarche	506856	TN2_Transcription	0.164608	2.72e-11	chr13
height	827834	TF2_CEBPB	-20.8721	2.74e-11	chr3
menarche	948908	PC2_Weak_Polycomb	-0.171825	2.77e-11	chr6
platelet	494762	TN4_Transcription	-78.6042	2.81e-11	chr12
platelet	227120	E12_Erythroblast-like	5.58741	2.85e-11	chr5
BMI	446634	P_Promoter	0.349721	2.9e-11	chr11
height	227598	TN4_Transcription	-0.249213	2.9e-11	chr5
BMI	987704	E8_Weak_multi-tissue	-0.755728	2.95e-11	chr7
asthma	242360	L5_Low_signal	-0.0469059	2.96e-11	chr5
platelet	817134	TN3_Transcription	-8.88113	2.97e-11	chr3
height	115410	L5_Low_signal	-1.18873	2.99e-11	chr2
platelet	97838	E5_B-cell-like	6.76543	2.99e-11	chr2
height	331000	E5_B-cell-like	-0.206831	3e-11	chr7
BMI	276494	L2_Low_signal	-4.4011	3.02e-11	chr6
BMI	110868	TN3_Transcription	-0.539632	3.02e-11	chr2
SBP	1103130	HET4_Heterochromatin	0.90995	3.05e-11	chr11
menarche	111150	TN1_Transcription	-0.159934	3.06e-11	chr2
platelet	227628	P_Promoter	-15.6301	3.07e-11	chr5
BMI	1204556	E10_Brain	1.25244	3.08e-11	chr16
BMD	173436	TN4_Transcription	-0.024613	3.09e-11	chr4
height	446512	E5_B-cell-like	-0.505755	3.1e-11	chr11
platelet	675922	E9_Liver_/_Intestine	4.7165	3.1e-11	chr21
height	551762	L3_Low_signal	-2.71096	3.1e-11	chr15
BMD	335322	PC1_Polycomb_/_Heterochromatin	-0.0576487	3.13e-11	chr8
BMI	1165974	E3_Brain_/_Melanocyte	-1.04281	3.14e-11	chr13
menarche	1185412	E7_Monocyte_/_Macrophage	-0.125146	3.16e-11	chr14
BMD	122620	CTCF_CTCF-Cohesin	0.00114216	3.23e-11	chr2
height	1129926	L6_Low_signal	5.18744	3.26e-11	chr12
height	862832	E7_Monocyte_/_Macrophage	-0.171913	3.27e-11	chr4
height	670968	HET3_Heterochromatin	-5.58868	3.32e-11	chr21
FVC	262578	E7_Monocyte_/_Macrophage	-0.0821466	3.33e-11	chr6
height	993584	PC1_Polycomb_/_Heterochromatin	1.52928	3.39e-11	chr7
BMI	666786	E1_Stem_cell	-2.15865	3.41e-11	chr20
BMI	582768	TN3_Transcription	-0.417615	3.41e-11	chr16
height	76656	E5_B-cell-like	-0.0522507	3.43e-11	chr2
height	558806	TN4_Transcription	-0.632271	3.43e-11	chr15
height	943838	E12_Erythroblast-like	1.97058	3.44e-11	chr6
BMI	261806	HET2_Heterochromatin	-2.0247	3.45e-11	chr6
platelet	597932	TN1_Transcription	16.4564	3.49e-11	chr17
height	378958	TN2_Transcription	-0.532934	3.5e-11	chr9
menarche	999050	E8_Weak_multi-tissue	0.0465903	3.52e-11	chr8
intelligence	1206368	PC4_Polycomb_/_Bivalent_stem_cell_Enh	1.22285	3.54e-11	chr16
BMI	233506	HET1_Heterochromatin	0.569274	3.65e-11	chr5
FVC	981580	TN2_Transcription	0.215119	3.66e-11	chr7
platelet	436892	E1_Stem_cell	-22.1534	3.66e-11	chr11
platelet	118462	E5_B-cell-like	-0.982858	3.67e-11	chr2
SBP	260978	HET3_Heterochromatin	-7.05627	3.7e-11	chr6
height	77720	HET2_Heterochromatin	0.740285	3.72e-11	chr2
height	661396	TF3_FOXA1_/_AR_/_ESR1	5.30747	3.74e-11	chr20
SBP	261076	E3_Brain_/_Melanocyte	-0.829469	3.74e-11	chr6
platelet	392156	E4_Multi-tissue	1.20903	3.75e-11	chr9
platelet	1131212	L7_Low_signal	-172.151	3.81e-11	chr12
BMD	283132	PC2_Weak_Polycomb	0.071895	3.83e-11	chr6
BMD	317826	E3_Brain_/_Melanocyte	0.0140748	3.89e-11	chr7
FVC	787470	TF1_NANOG_/_FOXA1	0.532202	3.99e-11	chr2
height	184996	TN4_Transcription	0.502595	4e-11	chr4
height	668628	E3_Brain_/_Melanocyte	-0.269402	4.03e-11	chr20
SBP	590438	TN3_Transcription	-0.624078	4.08e-11	chr17
platelet	933196	TF1_NANOG_/_FOXA1	61.5836	4.09e-11	chr6
intelligence	261904	E12_Erythroblast-like	0.175077	4.2e-11	chr6
height	957328	L7_Low_signal	2.1351	4.2e-11	chr6
FVC	654478	TF3_FOXA1_/_AR_/_ESR1	0.26561	4.22e-11	chr20
asthma	600986	E11_T-cell	0.086765	4.24e-11	chr17
platelet	204060	PC3_Polycomb	-35.27	4.24e-11	chr4
platelet	318726	PC1_Polycomb_/_Heterochromatin	-20.258	4.25e-11	chr7
platelet	373930	TN1_Transcription	1.98404	4.29e-11	chr9
BMI	599634	TN1_Transcription	0.139419	4.3e-11	chr17
height	954954	L4_Low_signal	-1.92374	4.34e-11	chr6
height	474388	E2_Multi-tissue	-0.240139	4.34e-11	chr12
menarche	433998	TN1_Transcription	-0.115225	4.35e-11	chr11
BMD	597668	L5_Low_signal	-0.00610122	4.35e-11	chr17
height	966064	TF2_CEBPB	-5.18426	4.37e-11	chr7
menarche	269894	E8_Weak_multi-tissue	0.604718	4.43e-11	chr6
height	1107446	HET1_Heterochromatin	-1.21681	4.45e-11	chr11
platelet	325606	TN3_Transcription	6.37357	4.45e-11	chr7
SBP	1105130	HET2_Heterochromatin	-0.204029	4.51e-11	chr11
BMI	542678	TN4_Transcription	0.600613	4.51e-11	chr14
BMI	643002	HET1_Heterochromatin	-0.178686	4.55e-11	chr19
height	362526	TN3_Transcription	-0.570954	4.56e-11	chr8
BMI	561848	P_Promoter	0.161703	4.57e-11	chr15
height	505178	TN3_Transcription	-1.28655	4.62e-11	chr13
height	651308	TN4_Transcription	-1.87535	4.66e-11	chr19
BMD	474314	HET4_Heterochromatin	-0.0177043	4.66e-11	chr12
height	446818	E11_T-cell	0.112471	4.68e-11	chr11
height	79820	TN3_Transcription	1.09048	4.83e-11	chr2
height	83048	TN3_Transcription	1.0717	4.84e-11	chr2
height	1173236	PC3_Polycomb	-0.875757	4.89e-11	chr14
height	589222	E4_Multi-tissue	-0.126152	4.96e-11	chr16
height	461538	TN4_Transcription	-1.15175	5.05e-11	chr11
BMI	665316	PC3_Polycomb	1.69669	5.07e-11	chr20
height	563190	E5_B-cell-like	0.124751	5.2e-11	chr15
height	867376	TN2_Transcription	-2.58768	5.21e-11	chr4
menarche	84874	PC4_Polycomb_/_Bivalent_stem_cell_Enh	2.82742	5.28e-11	chr2
height	481294	TN1_Transcription	-1.68081	5.32e-11	chr12
rhinitis	513112	TF3_FOXA1_/_AR_/_ESR1	0.135006	5.37e-11	chr13
platelet	326158	TN3_Transcription	20.6815	5.38e-11	chr7
menarche	625646	P_Promoter	0.0729188	5.39e-11	chr18
platelet	497918	TN3_Transcription	-2.45406	5.41e-11	chr12
platelet	116510	TN2_Transcription	-8.24259	5.43e-11	chr2
height	1105244	HET2_Heterochromatin	0.961922	5.44e-11	chr11
height	451374	TN1_Transcription	1.24244	5.46e-11	chr11
intelligence	930808	TF2_CEBPB	5.17722	5.49e-11	chr6
height	493070	E2_Multi-tissue	1.26447	5.5e-11	chr12
BMI	1015890	TF1_NANOG_/_FOXA1	4.51985	5.62e-11	chr8
FVC	174518	TN1_Transcription	-0.0680893	5.75e-11	chr4
BMI	1206800	L3_Low_signal	-6.31349	5.78e-11	chr16
BMD	290492	TN3_Transcription	-0.0314552	5.81e-11	chr6
platelet	647176	TN2_Transcription	2.87883	5.81e-11	chr19
BMI	539288	TN1_Transcription	1.56367	5.81e-11	chr14
height	266388	CTCF_CTCF-Cohesin	0.181494	5.83e-11	chr6
platelet	1195646	E4_Multi-tissue	-1.81932	5.87e-11	chr15
height	162520	E5_B-cell-like	0.150076	5.89e-11	chr3
height	485774	E10_Brain	-0.3093	5.97e-11	chr12
SBP	1263708	TF3_FOXA1_/_AR_/_ESR1	-1.20289	6.05e-11	chr20
SBP	534100	TN1_Transcription	3.28354	6.05e-11	chr14
height	560182	P_Promoter	0.851318	6.07e-11	chr15
SBP	746626	L2_Low_signal	-21.0998	6.14e-11	chr2
platelet	367704	TF1_NANOG_/_FOXA1	11.1377	6.18e-11	chr9
height	626426	PC4_Polycomb_/_Bivalent_stem_cell_Enh	0.901247	6.2e-11	chr18
BMI	783022	TF1_NANOG_/_FOXA1	4.91343	6.25e-11	chr2
height	667556	E3_Brain_/_Melanocyte	0.714663	6.28e-11	chr20
height	362192	HET4_Heterochromatin	-0.825522	6.34e-11	chr8
height	218344	TN1_Transcription	0.543378	6.4e-11	chr5
height	132712	TN1_Transcription	-0.892705	6.46e-11	chr3
SBP	1186160	TF2_CEBPB	4.5462	6.48e-11	chr14
BMD	272174	TN2_Transcription	0.0132148	6.5e-11	chr6
BMD	303022	PC4_Polycomb_/_Bivalent_stem_cell_Enh	0.0348357	6.54e-11	chr7
rhinitis	513264	E6_Weak_epithelial	-0.0759505	6.6e-11	chr13
BMI	331066	L5_Low_signal	-1.16108	6.61e-11	chr7
height	382164	HET1_Heterochromatin	-0.524675	6.62e-11	chr9
height	931996	L5_Low_signal	-0.253799	6.63e-11	chr6
menarche	1093318	E3_Brain_/_Melanocyte	2.15959	6.63e-11	chr11
platelet	654914	E2_Multi-tissue	0.722738	6.66e-11	chr20
height	366084	TN4_Transcription	-1.03709	6.69e-11	chr8
FVC	597912	TN4_Transcription	0.15082	6.76e-11	chr17
height	474418	E2_Multi-tissue	0.394623	6.79e-11	chr12
height	598426	TN1_Transcription	1.09857	6.84e-11	chr17
height	943410	TF5_AR	2.56275	6.94e-11	chr6
height	287228	E6_Weak_epithelial	-0.115001	6.98e-11	chr6
height	71088	E10_Brain	-0.489037	7.25e-11	chr2
asthma	867270	TN2_Transcription	0.496286	7.28e-11	chr4
SBP	478204	PC4_Polycomb_/_Bivalent_stem_cell_Enh	4.41727	7.37e-11	chr12
BMI	575010	TN1_Transcription	-0.145247	7.43e-11	chr16
SBP	1102630	HET2_Heterochromatin	-37.9703	7.45e-11	chr11
BMI	77818	E2_Multi-tissue	-0.0863442	7.45e-11	chr2
height	1093948	HET2_Heterochromatin	-11.7254	7.45e-11	chr11
FVC	143870	TN2_Transcription	0.082964	7.45e-11	chr3
BMD	307542	E6_Weak_epithelial	0.00557882	7.46e-11	chr7
BMI	503546	E8_Weak_multi-tissue	-0.604774	7.47e-11	chr13
height	588938	PC1_Polycomb_/_Heterochromatin	1.02289	7.52e-11	chr16
platelet	1120934	PC2_Weak_Polycomb	-20.099	7.67e-11	chr12
height	1269670	L3_Low_signal	4.8809	7.68e-11	chr20
platelet	676266	E7_Monocyte_/_Macrophage	13.2933	7.68e-11	chr21
BMI	1148236	TN3_Transcription	1.42922	7.89e-11	chr13
BMI	262754	E9_Liver_/_Intestine	0.0776988	8.02e-11	chr6
height	611094	E4_Multi-tissue	-0.175403	8.07e-11	chr17
height	362420	L3_Low_signal	-1.13053	8.09e-11	chr8
height	803498	TN4_Transcription	-1.98046	8.29e-11	chr3
platelet	468030	PC2_Weak_Polycomb	43.4945	8.3e-11	chr12
BMI	233454	E12_Erythroblast-like	-0.128096	8.31e-11	chr5
height	238748	TN3_Transcription	-0.843571	8.32e-11	chr5
SBP	1105078	HET2_Heterochromatin	-0.677065	8.33e-11	chr11
height	389646	TN2_Transcription	1.48225	8.37e-11	chr9
menarche	391018	PC4_Polycomb_/_Bivalent_stem_cell_Enh	0.156677	8.45e-11	chr9
height	1219086	PC3_Polycomb	15.3547	8.46e-11	chr16
menarche	1016496	L2_Low_signal	-7.14001	8.49e-11	chr8
height	253682	TN2_Transcription	2.51341	8.56e-11	chr6
platelet	318684	E8_Weak_multi-tissue	77.0142	8.61e-11	chr7
SBP	434610	PC1_Polycomb_/_Heterochromatin	4.3668	8.62e-11	chr11
intelligence	578788	TN4_Transcription	-0.509472	8.79e-11	chr16
SBP	334900	PC3_Polycomb	15.9397	8.83e-11	chr8
BMI	542410	TN4_Transcription	0.430688	9e-11	chr14
BMI	1018504	L1_Low_signal	-1.20429	9e-11	chr8
BMD	989784	L1_Low_signal	0.756444	9.03e-11	chr7
platelet	523590	TN2_Transcription	-3.86289	9.11e-11	chr14
BMD	270012	E4_Multi-tissue	-0.0132428	9.12e-11	chr6
height	661674	TN1_Transcription	-0.679197	9.13e-11	chr20
FVC	900640	L7_Low_signal	-3.55187	9.2e-11	chr5
platelet	112688	TF3_FOXA1_/_AR_/_ESR1	-1.06288	9.24e-11	chr2
SBP	642426	E1_Stem_cell	0.638827	9.26e-11	chr19
height	1124134	L2_Low_signal	17.0026	9.33e-11	chr12
height	66616	TN4_Transcription	0.221442	9.37e-11	chr2
platelet	345844	TN4_Transcription	2.96614	9.51e-11	chr8
height	965782	TF3_FOXA1_/_AR_/_ESR1	0.262331	9.61e-11	chr7
FVC	261584	TF3_FOXA1_/_AR_/_ESR1	-0.294856	9.67e-11	chr6
menarche	439008	E1_Stem_cell	0.587013	9.71e-11	chr11
BMI	87212	E10_Brain	-1.93728	9.8e-11	chr2
platelet	91924	L6_Low_signal	129.27	9.84e-11	chr2
BMD	137776	TN1_Transcription	0.0102647	9.84e-11	chr3
BMD	139852	E6_Weak_epithelial	-0.00474233	9.88e-11	chr3
height	478034	E9_Liver_/_Intestine	-0.443401	9.93e-11	chr12
height	1059106	TN2_Transcription	-1.45689	9.93e-11	chr9
SBP	244312	E2_Multi-tissue	0.360786	1e-10	chr5
height	1062854	L2_Low_signal	-4.04117	1e-10	chr9
height	79776	E5_B-cell-like	1.14211	1.01e-10	chr2
BMI	165044	HET4_Heterochromatin	0.255697	1.02e-10	chr3
height	614898	TN4_Transcription	-1.32239	1.02e-10	chr17
height	1059368	HET1_Heterochromatin	0.205624	1.02e-10	chr9
SBP	559914	L3_Low_signal	-5.121	1.03e-10	chr15
chronotype	921104	L5_Low_signal	0.0264702	1.05e-10	chr5
height	966776	L4_Low_signal	0.395668	1.05e-10	chr7
BMI	1033730	HET2_Heterochromatin	1.06916	1.06e-10	chr9
height	543488	PC1_Polycomb_/_Heterochromatin	-3.31772	1.06e-10	chr14
SBP	334514	TN4_Transcription	1.78526	1.06e-10	chr8
menarche	572314	E2_Multi-tissue	0.0314236	1.08e-10	chr16
height	1097984	E1_Stem_cell	1.86273	1.09e-10	chr11
BMD	137460	TN4_Transcription	-0.0871477	1.1e-10	chr3
height	665844	E6_Weak_epithelial	0.193595	1.1e-10	chr20
BMI	82910	E1_Stem_cell	-0.113771	1.1e-10	chr2
BMD	1227366	HET2_Heterochromatin	0.0353186	1.11e-10	chr17
SBP	126802	TN2_Transcription	-4.54054	1.13e-10	chr3
height	597526	P_Promoter	-0.71337	1.13e-10	chr17
height	116508	TN4_Transcription	-0.246672	1.14e-10	chr2
height	641996	P_Promoter	0.115688	1.14e-10	chr19
intelligence	261200	TN1_Transcription	-0.271468	1.15e-10	chr6
height	147260	E7_Monocyte_/_Macrophage	1.13048	1.15e-10	chr3
BMI	978400	L6_Low_signal	-3.70144	1.16e-10	chr7
chronotype	935082	L2_Low_signal	-0.596583	1.16e-10	chr6
height	900838	HET3_Heterochromatin	2.34551	1.17e-10	chr5
height	482826	E7_Monocyte_/_Macrophage	-1.57274	1.18e-10	chr12
FVC	807342	L3_Low_signal	-0.418072	1.18e-10	chr3
platelet	606228	TN3_Transcription	7.41246	1.18e-10	chr17
BMD	660148	L5_Low_signal	0.0101155	1.19e-10	chr20
height	598198	PC4_Polycomb_/_Bivalent_stem_cell_Enh	-0.931698	1.19e-10	chr17
SBP	443652	TN1_Transcription	-2.89885	1.19e-10	chr11
platelet	360774	E7_Monocyte_/_Macrophage	-1.21346	1.19e-10	chr8
BMI	639918	PC2_Weak_Polycomb	0.465989	1.2e-10	chr19
[truncated: 1,620 more rows]

## Sheet: d
locus id	association beta	p	PIP	SUSIE posterior beta	trait
397994	0.281152	5.16e-05	0.999087	0.282428	height
400070	-6.1185	4.2e-06	0.994343	-4.65271	height
400086	-1.43742	5.75e-07	0.999918	-1.21435	height
400492	0.616638	7.69e-07	1	0.702594	height
403898	-1.22852	7.25e-09	0.999905	-0.952615	height
404544	0.494036	0.11381	0.959734	1.12361	height
405618	-0.990601	0.000113686	0.979844	-1.06722	height
409520	1.9855	4.71e-09	0.992608	1.39237	height
409522	-1.32878	0.000166302	0.986469	-1.5043	height
410934	0.388478	6.56e-06	0.999985	0.395172	height
412736	-0.378541	2.51e-16	1	-0.308605	height
412898	-15.145	1.74e-15	0.994033	-9.45239	height
412924	-6.78013	6.13e-14	0.999545	-3.95434	height
416702	-1.73587	5.77e-16	0.999038	-1.97182	height
416720	-5.82137	0.00172059	0.995881	-6.68579	height
419264	1.82544	8.28e-07	0.994795	1.4116	height
419284	-4.74015	1.81e-09	0.999995	-4.3134	height
419404	7.13694	1.33e-07	0.957396	5.86303	height
420744	-0.726429	7.34e-05	0.955021	-0.566826	height
420946	0.697128	0.00378894	0.962224	0.76571	height
422512	0.76023	1.33e-05	0.998235	0.81474	height
423616	-0.257332	0.000512511	0.998837	-0.29754	height
425348	-1.66741	0.000350635	0.950364	-1.56039	height
425924	-0.289648	1.13e-05	0.999292	-0.248671	height
427114	-0.762346	7.85e-06	0.97008	-0.687786	height
427296	0.635088	1.87e-11	0.999105	0.446409	height
427384	-3.91493	1.72e-05	0.997755	-4.3991	height
428112	-0.922283	1.02e-06	0.987651	-0.696819	height
428358	3.31211	4.66e-12	0.991003	3.04427	height
428998	-1.56073	3.13e-11	0.998155	-1.16996	height
429112	-4.69619	8.74e-07	0.998276	-4.00557	height
429470	-2.48863	0.000343585	0.99766	-2.62731	height
429500	4.63444	0.000216154	0.973167	3.87374	height
430830	1.61245	0.00333292	0.99472	2.17657	height
1066136	2.69447	1.17e-11	0.999984	2.55282	height
1070054	21.1632	2.12e-05	0.990708	20.4042	height
1085180	-4.76303	5.44e-09	0.999995	-4.34795	height
1085984	10.9583	4.32e-09	0.963432	6.59776	height
432380	2.30366	1.83e-13	0.993144	1.6747	height
432596	0.375598	1.32e-15	1	0.700139	height
435254	-1.03032	0.000590009	0.997483	-2.23077	height
435532	0.371948	0.00747862	0.999969	-0.345262	height
436556	-1.0125	9.37e-05	0.992063	-2.56285	height
439402	-5.67457	0.0951969	0.985943	-17.2791	height
442448	0.00726981	0.866435	0.999956	2.48124	height
442728	-7.90551	1.63e-11	0.999153	-8.59834	height
442778	-0.149551	0.198633	0.963371	-3.62295	height
443420	-4.92045	4.64e-37	0.999958	-2.28467	height
445154	-3.13804	0.0228819	0.99399	-3.60277	height
446760	-2.82394	4.64e-08	0.999997	-12.1452	height
447372	-32.8349	4.74e-73	1	-46.1449	height
447720	0.140341	7.26e-10	0.995583	0.350315	height
448292	-0.342515	1.49e-06	1	-1.04454	height
448458	-0.598077	0.00154218	0.985599	-0.71363	height
450126	1.93365	7.95e-08	0.980228	5.78637	height
450502	0.137365	0.179426	1	3.04357	height
451626	-6.5283	0.230799	0.950849	-24.664	height
453180	-0.520404	0.00100553	0.985205	-2.20923	height
453890	-56.0374	8.91e-06	0.999939	-21.4544	height
455016	1.28328	0.692188	0.985362	-4.36235	height
460820	2.28179	9.83e-14	0.963109	1.68455	height
461488	1.56493	0.00216711	0.98922	4.18151	height
1093498	-0.50432	2.61e-08	0.954062	-1.78198	height
1093948	-11.7254	7.45e-11	0.98194	-14.7584	height
1094444	-2.29424	0.556208	0.984636	11.9413	height
1102150	10.1397	0.0944512	0.969705	29.3604	height
1107312	8.18805	4.86e-07	0.996441	8.94359	height
1119028	-2.16212	0.0993225	0.976006	14.1316	height
465866	0.695418	1.51e-06	0.998731	2.14184	height
465980	1.59794	0.000193848	0.999998	5.90505	height
467190	0.930831	0.00119602	0.999299	2.84425	height
467504	0.308062	0.00410268	0.973077	0.49757	height
467508	0.578227	4.15e-10	1	2.88621	height
467516	0.55311	3.14e-12	0.999776	0.290248	height
467520	0.6525	1.54e-17	0.999725	2.66689	height
467822	0.146039	0.490291	0.991034	0.839481	height
469748	-0.292159	7.24e-31	0.998049	0.789675	height
470152	1.12501	0.000208915	0.999084	-1.91739	height
470184	0.665752	3.37e-15	1	0.251224	height
470694	0.41982	5.5e-16	0.964703	2.27462	height
472038	0.995577	1.73e-10	0.954155	0.68801	height
472110	-1.9695	0.00552923	0.993298	9.21196	height
472168	-0.600699	5.79e-24	0.957935	-3.54294	height
472910	-0.432066	1.97e-08	0.998498	-0.649952	height
473838	-0.0649449	4.18e-09	0.99968	-0.0627315	height
477330	0.0413779	0.555851	0.991067	0.979197	height
477502	-0.164373	0.747629	0.99838	4.57725	height
477522	0.742529	1.78e-09	0.95183	0.388524	height
478004	-0.104381	0.000552607	0.987013	0.543442	height
478200	1.32175	0.000167474	0.988801	0.757	height
478204	-0.363904	0.105236	0.976402	-0.424817	height
479804	-0.177856	0.407917	0.955537	-1.19549	height
479806	-0.555346	6.49e-06	0.999965	-0.556886	height
479986	-0.0837728	5.89e-06	0.996285	-0.260694	height
480732	-4.46095	5.28e-09	0.972049	-4.70348	height
482894	-2.01313	1.28e-08	0.990172	-4.27614	height
482960	3.09019	0.000722372	0.999758	0.929811	height
483026	2.7473	1.49e-10	0.99886	2.8637	height
483064	3.51367	1.02e-07	0.999981	5.55763	height
483102	4.58753	1.57e-37	0.980644	3.69119	height
483104	-1.3769	3.05e-06	0.999962	7.69513	height
483126	2.44787	1.24e-44	0.981854	3.4274	height
483132	-0.789628	2.81e-18	0.999965	-0.393089	height
483154	-0.57262	0.000123177	0.988668	-0.598841	height
484154	5.41602	5.78e-20	0.999998	1.98884	height
485774	-0.3093	5.97e-11	0.997357	-0.963134	height
485806	1.09146	2.37e-14	0.994718	2.34189	height
488854	1.57244	3.11e-06	0.997415	-0.222073	height
489028	1.32846	2.95e-66	0.966338	1.92565	height
489038	0.550078	4.24e-41	0.999998	1.16715	height
489040	-0.119941	0.750212	0.999694	2.43768	height
489080	1.39986	2.53e-47	0.99964	1.59545	height
489148	-0.557186	4.84e-09	0.995032	-0.463824	height
489154	0.238412	0.535307	0.995105	-2.70157	height
491416	0.0446685	0.00356129	0.999999	0.1175	height
491442	-0.0444173	0.599101	0.999014	-0.708541	height
491524	-7.64674	2.5e-17	1	-10.3096	height
491594	-2.86724	2.42e-08	0.999807	-7.91091	height
491596	1.70716	3.04e-15	0.999973	1.88241	height
491600	0.0691289	0.28808	0.999292	2.33223	height
491606	1.27916	0.0177612	0.999995	-9.05115	height
491912	0.493616	0.353274	0.999966	-5.5678	height
492744	0.263248	3.61e-08	0.980577	0.614052	height
495934	-0.0797526	1.36e-08	0.953862	-0.11346	height
498022	0.227711	2.47e-10	0.956543	0.696704	height
498116	-0.355808	6.07e-11	0.998566	0.962041	height
499084	-2.86075	0.248049	0.999983	-28.7961	height
501142	-1.88168	9.96e-07	0.999259	-12.3388	height
1124612	0.514764	0.0144079	0.999627	5.53065	height
1124624	0.400055	0.000513904	0.958009	0.181794	height
1124636	-0.245597	0.444671	0.975264	2.17701	height
1124682	5.58829	1.68e-37	0.997042	-12.1822	height
1124746	-0.86859	6.18e-57	0.999016	-4.26693	height
1124910	2.77033	7.75e-06	0.979143	5.49461	height
1125382	0.280247	5.45e-08	0.989037	1.16458	height
1131152	-0.152639	0.329413	0.996936	-6.02689	height
1131666	-0.717594	0.137445	0.966964	-6.34539	height
1133248	11.361	6.09e-09	0.99911	12.0209	height
1133276	24.0364	1.2e-89	1	16.3828	height
1140402	0.0467714	0.00616178	0.973255	0.118248	height
1141330	2.43293	9.35e-10	0.997842	27.2944	height
1141398	-3.05177	0.0312741	0.999812	-17.3785	height
1141514	-1.20334	6.38e-08	0.994543	-2.32923	height
501784	-0.316402	0.0249188	0.999996	-1.43064	height
504192	0.0739531	9.02e-12	0.998889	0.076609	height
504986	3.72428	1.01e-05	0.997842	3.40864	height
510324	-2.19172	0.00297132	0.997542	-22.0864	height
510340	-2.47195	1.41e-48	0.999804	0.953823	height
510348	1.51263	6.8e-07	0.999856	1.42081	height
510396	-0.752383	3.73e-06	1	-5.95613	height
510566	-2.57942	9.37e-69	1	-1.1829	height
513102	-0.684698	0.0010991	0.999999	-0.653771	height
513220	2.257	0.232557	0.968186	-1.13675	height
521110	3.64289	8.44e-15	0.993029	1.63779	height
1149194	-5.04146	3.61e-07	0.980132	-6.68964	height
1158832	-3.11785	0.00020133	0.991658	-3.1525	height
1164602	6.98667	2.07e-15	0.999983	18.8076	height
521478	-0.153133	3.59e-19	0.976963	-0.123989	height
521604	-0.18994	1.88e-05	1	-2.47033	height
521614	-1.01388	2.48e-05	0.989556	-2.21186	height
522248	0.42327	3.36e-16	0.996646	1.39133	height
522500	0.17768	0.179194	0.978955	1.93759	height
522530	-0.254121	0.290197	0.991026	1.73019	height
522580	-1.46627	0.000536065	0.997613	3.6463	height
522610	-0.264406	7.27e-11	0.999997	-0.948897	height
524252	-0.966371	0.00156774	0.951753	1.34307	height
528454	-0.354764	2.04e-06	0.999098	-1.86117	height
530304	0.323449	0.0653774	0.983554	0.87059	height
530742	0.534534	0.342208	0.973745	9.24405	height
532280	-1.18917	2.28e-10	0.979084	2.9605	height
532476	-0.301822	1.01e-06	0.953502	-0.297103	height
534612	-8.91156	3.22e-25	1	-5.08304	height
534634	5.11398	1.62e-05	0.999998	10.4704	height
536548	-0.0365314	0.585322	0.960055	-3.09559	height
537484	0.670357	9.17e-05	0.9991	0.227734	height
538732	-0.462435	9.69e-15	0.999201	-0.581843	height
538778	-0.334385	2.19e-40	0.999912	-0.305779	height
539146	-0.00426516	0.95364	0.999586	-2.2006	height
539632	-0.167823	0.230949	0.999991	-1.60371	height
541540	0.33626	3.59e-08	0.990845	0.25445	height
541632	-0.503104	0.0553276	0.992072	-0.970305	height
542218	-0.252942	2.96e-06	0.993619	-0.819885	height
542234	1.99891	1.27e-11	0.999782	3.03675	height
542634	0.547392	3.76e-26	0.991681	0.928993	height
543164	-3.95402	0.000295538	0.997641	-1.44736	height
543180	-0.474409	1.2e-09	0.96782	-0.427537	height
543480	0.12186	2.9e-05	0.962073	-0.339136	height
1173030	2.73926	4.31e-08	0.987885	8.58178	height
1173236	-0.875757	4.89e-11	0.991628	-0.566849	height
1178084	0.373454	0.113892	0.985836	10.4691	height
1178454	-0.986836	7.9e-14	0.962849	-1.80875	height
1179500	30.2223	0.207095	0.990894	-25.6222	height
1179522	-4.3634	3.67e-49	0.999483	-3.26326	height
1185224	3.18115	0.0094854	0.980418	21.7408	height
1185512	0.951932	1.26e-06	1	14.5539	height
545920	-0.466675	4.56e-06	0.968789	-1.34795	height
547174	0.22325	1.33e-06	0.999936	0.67423	height
547246	-1.98141	0.160079	0.993248	-16.2043	height
548486	-0.0936635	0.44521	0.974906	-1.55209	height
550860	0.449488	0.0859036	0.992591	2.60999	height
551684	-0.553867	0.0362323	0.997774	-12.3297	height
551698	0.855638	1.81e-19	0.99893	0.547268	height
551758	0.544409	1.88e-05	0.994715	0.364703	height
554450	-3.00126	3.71e-07	0.990265	-8.06732	height
554910	0.194159	3.36e-17	0.998763	0.170326	height
554998	0.246115	3.68e-07	0.975745	0.327662	height
556442	2.21455	2.01e-09	0.999456	2.13462	height
556878	0.0462484	0.11161	0.979632	0.803672	height
557012	-0.0607411	0.704764	0.96614	-1.31735	height
557038	0.498326	0.000526297	0.998217	-0.942434	height
557078	0.729764	0.000516745	0.997833	0.982456	height
557950	0.728931	3.64e-32	0.998584	1.09466	height
558074	0.959631	4e-20	1	2.73181	height
558136	-1.34012	3.21e-10	0.988611	-1.78469	height
559490	-0.118997	0.313862	0.999929	-0.310607	height
559510	-0.363914	6.27e-29	1	0.774106	height
559580	-4.0019	1.24e-25	1	-5.25433	height
559768	-0.47912	6.6e-08	0.999036	-2.40077	height
560060	0.894999	1.65e-16	0.999928	5.90146	height
561884	0.412919	6.75e-06	0.999641	1.71591	height
562106	0.180006	0.0502555	0.999365	-0.598102	height
562712	-1.72854	0.0195364	0.999389	-8.04133	height
562776	3.86612	2.37e-10	1	10.073	height
562792	-4.66586	3.12e-103	1	-2.21644	height
563096	-1.47485	3.45e-13	0.977295	-2.49021	height
563998	-1.0119	0.0111843	1	-0.823386	height
564512	-0.336559	2.63e-06	0.99338	-0.863161	height
564646	-0.471004	3.36e-11	0.991761	-0.650603	height
565744	-2.30102	1.44e-09	0.999009	-10.6344	height
566022	0.194141	1.4e-06	0.997587	1.15636	height
566604	0.242562	1.18e-07	0.998844	0.51384	height
566614	0.223419	7.34e-20	0.999999	0.517694	height
566626	0.0962349	1.8e-15	0.991305	0.0605729	height
566710	0.581789	1.68e-12	0.999237	2.67094	height
566756	-0.287214	8.3e-11	0.999086	-0.260498	height
567116	1.02441	0.0586296	1	3.50494	height
567142	0.0401048	0.0630173	0.999994	0.124325	height
567152	0.142075	2.86e-08	0.999347	0.310682	height
567174	-0.38779	3.77e-07	0.998385	-0.17071	height
567190	0.331588	1.19e-34	0.99991	-0.849484	height
567222	-0.156927	5.67e-12	0.953149	-0.409864	height
567512	-0.18474	5.74e-08	0.998166	1.20369	height
567568	1.05946	9.08e-17	0.999996	0.695624	height
1188870	1.66729	1.82e-05	0.951319	2.51433	height
1195344	0.655829	0.402147	0.989293	-1.31953	height
1195842	6.51604	3.31e-12	0.999025	-1.74847	height
1196474	8.16432	1.49e-07	0.994088	6.66143	height
1198844	-0.399582	0.476928	0.970112	-12.2337	height
1198866	2.1259	1.98e-44	0.999996	16.9768	height
1198872	0.647987	2.65e-06	0.999202	-1.74968	height
1198874	0.47521	7.34e-27	0.996238	0.659258	height
1198878	5.24702	6.84e-10	1	7.93817	height
1200748	16.8593	5.63e-20	1	-15.5861	height
1200898	16.1428	2.55e-07	0.995309	15.8059	height
1200910	0.510141	1.7e-05	0.972537	-1.35143	height
567928	0.605114	4.01e-07	1	1.47594	height
568272	-0.279988	0.00117407	0.984095	-0.878378	height
568718	-0.173543	0.0415047	0.979574	-0.330355	height
568762	6.58397	1.07e-13	1	38.4495	height
568800	0.278409	6.61e-12	0.998845	0.293373	height
569534	-0.282138	2.02e-05	0.984508	-0.402348	height
569844	0.424762	4.54e-12	0.988607	0.533132	height
570558	0.718991	2.65e-10	0.982977	3.06454	height
572298	-1.07467	1.23e-18	0.978877	-1.07588	height
572518	-0.316629	1.22e-09	0.96247	-1.53205	height
572848	-0.816148	0.00103155	0.99759	-0.74366	height
581754	-24.747	0.116188	0.999992	-47.3299	height
583084	-4.53235	1.02e-08	0.983306	-18.1368	height
584532	-0.105587	1.32e-13	0.999966	-0.363885	height
584624	-0.291198	9.43e-12	0.978667	-1.06231	height
585198	-0.0810098	1.08e-05	0.98931	-0.0850507	height
586158	0.19977	1.99e-10	0.999721	0.451581	height
586194	0.278815	5.43e-06	0.999227	0.583446	height
586436	-0.291678	0.189437	0.999984	-0.527321	height
587178	0.0338205	0.202689	0.997516	-0.517206	height
587220	0.25715	5.02e-09	0.99355	0.218854	height
587276	-0.454578	1.71e-13	1	-0.867931	height
587610	0.00382316	0.973268	0.998982	0.753498	height
587930	-0.957659	4.7e-06	0.977394	0.699385	height
588864	0.360691	1.13e-17	0.999954	0.295449	height
588884	-0.316882	5.41e-12	0.998159	-0.523946	height
589214	-0.0108426	0.634508	0.985267	0.729399	height
589244	-0.270828	0.375612	0.992524	4.83719	height
589298	-0.600383	1.11e-13	0.999807	-1.22173	height
1201228	-2.9519	0.00484121	0.999922	-6.29386	height
1203938	1.08204	7.31e-07	0.997091	1.29919	height
1204514	1.04098	4.89e-10	0.998411	-2.50352	height
1219040	-0.452487	2.66e-08	0.986068	-2.01665	height
1219372	0.775293	2.73e-10	0.982653	1.39697	height
1221378	1.7049	1.93e-05	0.996628	3.59494	height
591052	0.0570842	0.00036719	0.984722	0.122369	height
592332	-0.165144	6.31e-15	1	-0.565806	height
592384	-0.38435	0.0756464	0.992936	-3.17189	height
592398	-0.587079	2.76e-18	0.9983	2.62255	height
592400	2.05513	3.18e-06	0.997931	2.32458	height
592572	0.314638	3.64e-10	0.991172	0.426419	height
593374	-0.0763736	5.18e-07	0.968087	-0.120039	height
595434	1.57627	1.2e-08	0.99551	0.795927	height
595594	-1.13715	1.19e-16	0.990533	-3.90346	height
596508	21.1657	1.69e-20	0.999656	21.9001	height
596520	-0.487238	3.62e-18	0.972264	-0.211049	height
597006	-1.18306	0.0789944	0.951923	1.82476	height
597474	5.63957	3.24e-07	0.976001	4.79659	height
597514	0.337866	0.660261	0.999382	-6.28156	height
597648	1.34862	2.2e-05	0.99796	0.952891	height
597992	-6.37783	1.14e-82	1	-34.0866	height
600462	3.72374	1.09e-07	0.99974	7.22289	height
600510	-0.495997	3.39e-07	0.9589	-0.223926	height
601028	0.261134	3.19e-07	0.994215	0.317899	height
601182	0.54282	4e-13	0.999793	0.570542	height
601194	-0.191601	0.000796814	0.994774	-0.393159	height
603044	0.0227914	0.510721	0.977847	0.754094	height
603078	-3.37764	9.55e-22	1	-3.76815	height
603758	0.513336	2.42e-08	0.999518	-2.61596	height
603966	0.275086	2.19e-17	0.999432	0.334289	height
604256	0.974725	3.53e-20	0.996813	0.940879	height
604334	4.89896	1.07e-05	0.985993	4.45426	height
604418	2.03979	2.46e-22	0.997051	1.42514	height
605234	0.218022	0.0101239	0.968714	0.539379	height
605866	0.283025	1.54e-09	0.99283	0.489974	height
605998	4.34623	2.69e-11	0.998785	4.4235	height
607648	-0.373483	2.25e-58	1	-0.709124	height
607650	-4.47464	5.54e-36	1	2.21314	height
608450	0.652771	0.000478614	0.963544	0.734246	height
608504	-1.09614	1.13e-74	0.999969	-1.58396	height
608700	1.4914	5.83e-06	0.994695	1.60082	height
609104	0.816295	1.79e-15	1	0.513617	height
609276	-0.40761	3.62e-15	0.958494	-0.342955	height
610084	0.311254	7.29e-18	0.979726	0.322207	height
610796	0.322801	1.07e-07	0.99953	0.336955	height
610982	0.322827	0.025025	0.978161	0.510219	height
611130	0.730921	2.56e-05	0.990203	0.610891	height
611580	-0.270381	8.17e-07	0.973243	-0.371722	height
612366	0.277148	1.72e-05	0.998221	0.669076	height
613642	-0.164552	3.98e-06	0.999248	-0.327561	height
613988	0.781907	3.52e-09	0.984942	1.0931	height
614878	-0.218753	1.95e-06	0.996335	-0.334126	height
614898	-1.32239	1.02e-10	0.982037	-2.08084	height
615042	0.183606	1.29e-08	0.966047	0.424132	height
615312	0.597789	5.07e-10	0.998192	0.668861	height
1223486	0.27832	0.188905	0.957117	3.23333	height
1227316	10.1147	8.08e-16	0.999919	24.9031	height
1227474	4.10314	6.96e-09	0.995239	3.76832	height
1229122	4.93333	3.27e-21	0.998677	6.48379	height
1231572	1.38736	1.6e-05	0.997964	3.42101	height
1231598	-1.50909	0.184888	0.957407	9.72767	height
1231610	0.632185	5.6e-23	0.985852	1.12058	height
1232110	-7.47715	0.000464592	0.999501	14.9097	height
1233030	-1.40048	1.15e-13	0.982641	-7.04112	height
616422	0.406335	0.0278432	0.998053	1.44017	height
617632	-0.835614	8.28e-07	0.957623	-1.19016	height
620676	4.38346	1.55e-132	1	-5.96056	height
621934	0.780213	1.73e-06	0.989061	0.930115	height
622712	2.68873	0.0152895	0.997417	19.208	height
626282	1.35766	6.57e-25	0.999854	1.62245	height
626286	-12.5723	1.63e-21	0.999992	-9.65679	height
626354	-2.91846	2.65e-30	0.993023	-8.53571	height
1237038	59.9352	1.64e-05	0.984618	69.7573	height
1246144	-2.36924	0.0325062	0.961614	4.23737	height
633722	-1.3883	1.13e-36	0.999351	-0.803341	height
633730	-0.903995	2.13e-15	0.991633	0.743617	height
634264	-3.9753	3.09e-10	0.982366	-6.24636	height
634280	1.34358	4.58e-20	0.999931	1.58312	height
634286	-0.110699	0.56603	0.986066	2.64723	height
634908	-0.0987646	0.120839	0.967654	-1.09825	height
634964	-0.581394	8.79e-25	0.982838	0.44325	height
634980	-1.20374	9.08e-39	0.999996	-3.15944	height
635782	0.268443	0.0843227	0.998998	1.52531	height
635794	-0.50953	0.00238623	0.999923	-3.05009	height
635808	-0.127233	3.91e-16	0.981998	0.671882	height
635828	0.307481	3.87e-19	0.998267	0.219526	height
636420	-20.1658	3.17e-29	0.999733	-12.6508	height
636436	1.56029	5.35e-69	1	2.77198	height
636852	1.05109	2.63e-07	0.999758	-2.44299	height
637254	-1.0805	1.49e-10	0.991358	-5.65327	height
637980	0.330942	5.58e-10	0.96056	0.289946	height
638070	0.22589	8.72e-09	0.972484	1.45459	height
639148	2.46053	1.37e-08	0.992839	4.63068	height
639498	-0.0505561	0.000124178	0.999937	0.571106	height
639870	-1.17375	1.43e-10	0.999998	-3.03724	height
640460	0.184414	1.03e-05	0.965802	0.611043	height
640548	-1.69692	3.82e-14	0.96429	-2.05359	height
642224	-4.00066	8.17e-05	0.978621	-6.62716	height
644926	-0.109757	0.108907	0.99993	-0.809145	height
645478	0.274869	0.00079328	0.989222	1.94939	height
645558	0.791295	0.000376324	0.996961	0.576923	height
647118	3.96805	9.64e-06	0.999261	17.4371	height
647452	0.324098	0.185762	0.979141	0.723734	height
647762	-0.0741004	1.04e-08	0.999996	-0.230933	height
649076	2.78129	3.5e-05	0.961934	6.88749	height
651308	-1.87535	4.66e-11	0.999914	-1.6376	height
651390	0.412667	3.9e-10	0.991281	0.365223	height
651620	-0.722867	4.71e-12	0.997234	-0.773979	height
1261340	1.56315	0.00323879	0.963923	4.23777	height
21520	0.557389	8e-05	0.999072	0.589565	height
26632	3.50966	1.35e-09	0.968412	3.03083	height
2680	2.41515	0.00106937	0.987084	2.71786	height
28394	-11.8698	4.9e-07	0.979174	-7.6028	height
28450	2.74525	1.76e-07	0.994313	2.11164	height
28580	3.64143	9.55e-08	0.981861	3.15123	height
3044	-0.937126	6.75e-09	0.999217	-0.627822	height
3058	0.358543	1.32e-06	0.999938	0.338292	height
3154	8.09605	1.8e-07	0.998194	6.59713	height
33012	-0.382256	1.84e-09	0.980012	-0.345754	height
35214	-0.748253	5.83e-10	0.99998	-0.808034	height
3554	0.461805	7.89e-09	0.971484	0.407547	height
35904	1.85868	4.57e-06	0.999947	1.82749	height
36264	-3.34407	7.25e-12	0.999805	-2.30645	height
36272	18.6217	1.46e-12	1	13.5445	height
36274	-4.76252	2.79e-19	0.999995	-3.24226	height
36304	-10.6871	0.000267505	0.999834	-14.5868	height
36550	-0.713731	0.000908051	0.999801	-1.0282	height
36554	0.610282	5.2e-15	0.999999	0.401224	height
38016	0.72939	0.00118952	0.98657	0.845352	height
38024	-8.68041	0.00201899	0.979239	-9.64257	height
38758	-6.32908	7.73e-05	0.952434	-5.05926	height
3942	19.497	1.76e-08	0.991321	18.9889	height
41326	-4.85663	3.63e-10	0.999456	-3.42233	height
43306	-3.22883	2.11e-29	0.999968	-2.1064	height
44628	11.8348	1.3e-16	1	13.1599	height
44712	5.19526	0.000216239	0.968669	4.84957	height
44828	-0.707595	2.12e-05	0.965285	-0.514997	height
46470	-1.65143	4.08e-07	0.981509	-1.66001	height
46854	2.96834	2.4e-35	0.989282	2.62491	height
52076	1.11524	7.38e-05	0.984556	1.11671	height
53432	-0.273786	1.28e-06	0.993951	-0.200207	height
53988	1.15432	4.23e-11	0.998657	0.987407	height
55486	-2.54236	3.2e-07	0.995011	-1.93161	height
55524	-10.5993	3.09e-19	0.999997	-10.2947	height
55544	-6.69147	1.09e-08	0.975242	-3.97495	height
55610	0.912819	0.0154469	0.994578	1.38923	height
55634	0.272022	6.76e-09	0.97077	0.235014	height
58154	-1.18346	5.01e-06	0.992271	-0.967686	height
58254	0.941439	0.00304841	0.96858	1.06222	height
5830	0.766688	1.86e-25	0.959203	0.258284	height
5836	-2.89119	5.4e-05	0.999955	-3.55939	height
5838	1.10832	7.27e-24	0.999999	0.867568	height
586	-1.52866	6.68e-12	0.989421	-1.16691	height
58946	-0.214878	1.03e-06	0.95478	-0.146337	height
60564	0.54418	0.00637285	0.978355	0.635749	height
63050	-8.91039	0.00201139	0.99802	-10.4842	height
6692	2.45652	3.59e-08	0.993944	1.81269	height
672	-0.412004	0.000207917	0.998571	-0.42922	height
694104	6.96682	6.49e-09	0.965534	5.39926	height
696006	3.35778	1.64e-28	1	3.1578	height
696310	8.08554	0.000257455	0.999477	8.65847	height
696634	3.70319	0.00171923	0.97195	4.84006	height
696642	2.01039	1.93e-06	0.956687	1.36303	height
696658	-8.04303	5.98e-08	0.999383	-8.08026	height
697488	-59.8612	3.57e-15	0.99058	-71.3231	height
705960	4.61337	1.81e-10	0.974357	3.17853	height
707530	1.47492	1.49e-05	0.986062	1.17786	height
711288	-6.35617	1.72e-30	0.961481	-5.08922	height
728364	1.38811	0.00158882	0.987465	1.54042	height
728594	12.6553	5.25e-31	0.988049	10.2209	height
729306	24.809	3.6e-09	0.999302	22.8716	height
729338	10.5409	0.000982434	0.983457	13.3975	height
736808	90.9461	7.92e-06	0.998259	73.1967	height
7386	1.30659	1.4e-05	0.999994	1.35229	height
739154	0.718552	7.47e-21	0.987532	0.41158	height
739204	-3.22109	3.6e-15	0.999653	-2.75686	height
740876	-0.137345	0.0390083	0.965595	-0.197665	height
82	-1.53398	2.65e-06	0.954723	-1.07538	height
8916	0.731284	9.13e-08	0.999946	0.582946	height
9542	0.847612	4.26e-12	0.985122	0.760509	height
11464	1.12435	7.29e-08	0.997851	0.959096	height
13448	-2.07426	1.23e-05	0.996039	-2.08992	height
13606	-1.0734	7.82e-14	0.98892	-0.646467	height
150	-3.32633	1.2e-05	0.978772	-2.44209	height
18576	-0.284828	1.34e-07	0.997499	-0.206618	height
18824	-1.43243	7.62e-09	0.964754	-1.07103	height
19120	2.56985	9.28e-11	0.999437	2.06958	height
653764	-0.903899	1.64e-17	1	-10.1668	height
654508	2.67077	1.14e-85	0.988927	2.11719	height
654540	0.161403	1.56e-16	0.999923	0.191539	height
658160	1.9733	2.19e-10	0.969977	-1.32871	height
660118	1.29792	3.14e-08	0.968536	5.83519	height
660218	-0.102302	0.358022	0.998984	3.54039	height
660878	2.24898	0.00202332	0.987762	19.6005	height
660900	-0.756924	0.0962478	1	3.50104	height
660922	7.34072	1.21e-166	1	45.2062	height
660966	-2.76142	4.7e-15	0.999979	11.1998	height
661052	-8.28004	7.13e-33	0.970433	14.0958	height
661438	-3.78629	0.000386779	0.971539	-11.5734	height
661614	2.31289	4.65e-07	0.999993	23.2969	height
661618	-1.51585	0.000154234	0.99993	-13.9723	height
661654	12.1212	3.95e-13	0.989284	20.2564	height
665476	-1.29856	2.67e-45	0.99928	-1.03186	height
665826	-2.61014	0.00716386	0.99936	7.29153	height
665984	0.456887	1.5e-05	0.999793	0.692883	height
666072	0.423997	6.57e-08	0.982825	0.790685	height
668560	0.215743	2.88e-07	0.999998	0.456747	height
669792	1.08248	2.45e-11	0.994094	1.02744	height
669816	0.341124	1.45e-11	0.999869	0.282782	height
670088	0.665732	0.000291477	0.999478	1.40061	height
670164	-0.797656	5.74e-06	0.998276	-2.6482	height
670412	0.576135	0.473311	0.999968	5.96886	height
1262924	-3.68508	2.34e-07	0.998877	17.0704	height
1262970	-2.92013	2e-07	0.973479	-1.66179	height
1263786	-2.56957	0.0386067	0.975791	-7.73554	height
1265502	1.01178	0.000206341	0.964122	1.81079	height
1270238	2.64452	1.5e-11	0.998547	2.36086	height
1270356	-0.954032	3.71e-05	0.995372	-3.20399	height
670970	-1.21603	6.88e-06	0.994729	3.25537	height
672382	7.8297	1.61e-09	0.999998	3.88654	height
674392	2.56607	3.17e-23	0.998613	1.87632	height
675174	1.94712	0.000448596	0.999977	6.1148	height
675816	0.29124	5.35e-05	0.995298	-0.21194	height
677646	1.00792	4.77e-06	0.987416	0.962613	height
678904	0.461935	0.00220529	0.987283	0.796831	height
679050	-0.268411	0.000435048	0.981956	-2.64484	height
1282228	-1.09857	5.68e-07	0.984359	-0.880011	height
64338	-0.10051	2.41e-14	0.96179	-0.384195	height
64666	0.0567673	7.81e-08	0.97545	0.11013	height
64686	-0.0540008	3.21e-06	0.996963	-0.139382	height
65504	-0.554893	2.44e-07	0.986539	-0.723245	height
66862	1.55718	4.85e-25	1	1.54848	height
66924	0.41504	0.000122993	0.981313	0.820392	height
69428	-0.258218	0.00118418	1	1.37517	height
70292	-1.99972	1.42e-17	0.981157	-0.963182	height
70734	-1.20974	4.35e-33	0.989507	-3.15604	height
70896	0.429262	7.54e-23	1	0.99919	height
70908	3.74283	2.96e-56	0.998024	3.11756	height
71090	0.148171	1.34e-09	0.990125	0.0995453	height
73722	-0.0948048	0.000196626	0.999997	-0.478829	height
73772	-1.71572	6.9e-26	1	-0.496429	height
73830	6.6531	1.17e-15	1	19.6813	height
73960	-0.0321802	0.581171	0.95251	-0.652596	height
74766	0.0310209	0.859854	0.992548	3.40816	height
74780	0.188925	0.553496	0.999916	3.92864	height
74782	0.510345	4.05e-14	0.984022	0.448357	height
750498	-1.53594	0.00152023	0.97736	-1.5949	height
750700	0.450293	4.94e-21	0.999998	0.380284	height
752724	-1.16503	0.00118664	0.999974	1.74999	height
752772	-2.36607	4.69e-86	1	-2.6479	height
755588	4.77651	0.00369315	0.987912	6.66314	height
755600	2.85936	0.0306989	0.999998	8.72909	height
755692	-1.40901	6.77e-06	0.999072	-2.24591	height
760328	-7.74722	0.000112843	0.999614	-18.6448	height
761762	-12.0396	0.0633393	0.992057	-55.2332	height
764348	4.97676	2.04e-07	0.984253	14.3047	height
765306	-2.0961	5.84e-14	0.999938	-1.7146	height
77084	-0.296483	0.0480103	0.968675	-2.10553	height
770980	1.17842	0.0133934	0.988421	5.93557	height
772742	-0.852044	1.61e-07	0.959555	3.68843	height
77494	0.401197	8.03e-07	0.968509	0.498657	height
778458	-16.9271	2.91e-07	0.99979	-15.6632	height
784034	2.26955	0.834572	0.95863	-13.1923	height
78582	-0.0974431	1.88e-07	0.997618	-0.232822	height
790890	-2.57924	1.01e-08	0.999217	-8.30081	height
790966	2.30888	9.68e-06	0.980182	-12.7531	height
791992	-1.43131	5.76e-11	0.953753	-1.60537	height
792396	-12.0411	0.0698341	0.99814	21.733	height
792422	-24.5168	6.92e-09	0.999146	25.8582	height
793190	2.48189	3.18e-37	0.990848	2.16775	height
793690	3.6606	1.75e-08	0.985996	1.95982	height
79462	-0.220336	2.22e-07	0.957309	-0.148993	height
79774	0.68476	5.7e-10	0.997167	3.70769	height
79776	1.14211	1.01e-10	0.999999	-1.99326	height
79948	-6.75056	5.08e-35	0.964317	-5.06282	height
79976	0.949431	0.031663	0.994941	-12.8831	height
79980	-17.0845	1.53e-107	1	-12.7044	height
80690	0.267371	1.26e-07	0.998061	1.21313	height
83048	1.0717	4.84e-11	0.999439	0.599657	height
83274	-0.14188	0.0644262	0.983642	-1.1904	height
83334	-3.16629	0.0801616	0.974467	-3.70546	height
83348	-2.07416	1.94e-05	0.994714	-2.6	height
83352	-0.112355	1.12e-08	0.99211	-0.187057	height
84286	0.563041	4.88e-08	0.999997	0.895468	height
84310	-0.710158	4.11e-10	0.991963	-1.77178	height
86780	-6.27402	0.000412115	0.975243	5.16659	height
87536	-5.48335	1.86e-16	0.997138	-3.09979	height
87830	-1.29319	0.102612	0.994951	-11.5174	height
88212	-5.05456	8.85e-17	0.999994	14.8523	height
90788	-0.989529	3.09e-08	0.99799	-0.724589	height
93914	0.412177	8.45e-10	0.988257	1.52591	height
93924	0.759232	3.19e-09	0.999999	1.29315	height
101688	0.196074	0.0324893	0.990856	-0.55878	height
103566	2.55975	0.0404083	0.994484	4.97563	height
103592	0.419749	3.17e-27	0.999985	0.437899	height
104426	-0.355823	1.89e-05	0.9968	-0.192384	height
105326	-1.83468	0.00824694	0.996099	-5.83368	height
106426	-0.10645	9.23e-12	0.995232	-0.192544	height
111204	-0.758314	5.16e-10	0.99895	5.24031	height
112494	-10.0802	0.00146186	0.983702	-11.7493	height
116044	2.00775	2.74e-05	0.999804	-1.89692	height
116190	-2.84108	2.27e-10	0.999713	-6.73733	height
116294	0.0332803	0.334892	0.998245	0.108082	height
116548	4.90086	3.17e-18	0.956763	8.76749	height
116818	-0.20884	0.849227	0.998238	-12.283	height
116852	-2.67854	0.0539907	0.998362	-2.41732	height
116946	0.123696	8.46e-05	0.999677	0.0833012	height
117882	-0.543404	0.123217	0.973131	0.528163	height
118202	-0.419554	1.22e-12	0.995368	-0.381992	height
118430	-0.175739	0.0869131	0.999704	-0.591812	height
120376	-0.188062	4.75e-28	0.96405	-0.530484	height
120538	-0.65481	3.35e-08	0.999904	-1.37159	height
120564	2.6809	3.11e-19	1	2.39619	height
120632	0.471422	6.47e-44	1	0.355152	height
122626	-0.904411	0.000218887	0.991223	2.13181	height
123886	0.295233	0.293402	0.999503	2.41834	height
124238	-0.11587	1.71e-24	0.999998	-0.265514	height
796794	-0.578181	0.000291829	0.976264	-2.04687	height
799044	0.697385	0.455077	0.950921	16.768	height
799084	1.69517	2.27e-09	0.967978	1.08365	height
799216	3.23122	5.33e-13	0.953552	11.5808	height
804476	0.761124	6.64e-12	0.99668	5.161	height
805540	-1.71049	0.000664773	0.984475	-5.9481	height
807114	5.88808	0.00376539	0.999664	15.2048	height
807438	5.03532	2.68e-26	0.998211	3.57382	height
812284	2.70401	0.00185562	0.999073	11.5756	height
816870	9.11033	0.00183687	0.999197	-21.0404	height
820158	10.7896	2.12e-06	0.996776	7.76833	height
820212	18.7288	0.0343962	0.95611	9.52576	height
826006	-152.094	0.123724	0.995551	-1847.95	height
831600	-0.624698	9.24e-10	0.997764	-1.03792	height
831878	15.3443	1.88e-09	1	-38.2343	height
834782	-3.70761	0.000533625	0.95685	-16.3944	height
835200	8.6172	0.00127448	0.964754	6.71744	height
125770	-0.0360163	0.58543	0.958117	-0.940991	height
127186	-0.320027	2.85e-05	0.999992	-1.5544	height
127580	-2.5486	5.32e-07	0.998105	-3.1426	height
127778	0.408329	1.83e-12	0.999849	0.393207	height
132036	-0.771756	3.81e-07	0.986344	-0.727719	height
132598	-1.13993	5.98e-07	0.995811	-1.34557	height
132636	0.5276	2.17e-08	0.999463	2.0304	height
132732	-0.224805	0.238003	0.99999	12.8525	height
133416	-1.9307	0.00161704	0.957704	-1.1499	height
136552	2.82711	1.05e-06	0.999892	2.79663	height
136702	-0.0411942	0.165117	0.977257	-0.355998	height
136784	-4.17771	8.71e-22	0.999122	9.70193	height
136848	-4.90137	2.71e-10	0.987964	-2.8756	height
137020	-1.4043	0.000131457	0.965271	-0.914176	height
137376	2.67573	7.25e-18	0.999912	4.89165	height
139092	0.336757	0.0113079	0.962731	3.11362	height
139694	-0.248575	1.3e-08	0.97457	-0.205435	height
140084	-0.110686	0.063872	0.966932	-1.85892	height
140200	0.444584	5.67e-06	0.976845	0.504667	height
140460	1.42125	1.37e-10	0.996386	4.71543	height
140524	-1.20392	2.22e-05	0.999701	-1.83529	height
140836	0.067839	0.0409697	0.95558	0.581324	height
141252	2.78548	4.81e-18	0.998496	1.4133	height
141264	0.217118	2.79e-24	0.999281	0.358097	height
141276	0.140992	1.23e-10	0.996076	0.17453	height
141310	0.387464	2.51e-10	0.999835	0.334456	height
141420	-0.188923	1.19e-07	0.972274	-0.826294	height
144178	-5.40936	6.42e-16	1	-3.89904	height
147260	1.13048	1.15e-10	0.994719	3.73552	height
147262	-0.142522	0.000341168	0.984239	0.74406	height
147536	0.309195	0.000907666	0.999302	-0.708014	height
149804	-2.13172	2.52e-07	0.998977	-1.25549	height
150456	-0.408453	3.31e-12	0.994349	-2.24863	height
150942	0.0592954	0.995309	0.996763	-19.3161	height
153166	-0.989397	1.1e-15	0.99979	-5.54113	height
155468	-0.153149	0.00273367	0.99864	0.955676	height
155492	-2.20284	1.04e-40	0.999904	-2.86878	height
156920	1.93757	1.71e-06	0.968578	1.95127	height
158646	1.55402	8.41e-11	0.996157	5.31046	height
158654	-0.536866	1.68e-11	1	-1.04828	height
158666	-0.570197	1.14e-173	1	-0.717469	height
158682	0.0579421	0.740643	1	-3.23452	height
158790	-0.457998	0.0824111	0.998485	-2.68386	height
160010	0.136661	0.548585	0.960882	3.68697	height
160582	-0.275421	6.33e-06	0.966606	0.332313	height
164572	-0.533368	2.16e-08	0.99707	-0.710248	height
165566	0.677503	3.68e-45	1	2.99539	height
168422	1.57335	0.350177	0.999681	18.002	height
169042	-0.649017	6.77e-09	1	-1.31963	height
169048	-0.189428	0.384168	0.991525	-0.592019	height
169074	11.1687	2.41e-08	1	-5.8168	height
169086	-0.103575	0.248543	1	2.21748	height
169716	-3.65451	7.9e-23	1	-1.14682	height
170596	11.3516	0.000394069	0.956432	8.86559	height
202104	0.411555	2.55e-12	0.997519	1.37391	height
202192	-0.491792	3.31e-20	0.998205	-2.00091	height
202286	15.8175	0.0022473	1	84.8448	height
202290	1.05439	9.36e-16	1	3.34175	height
202294	1.85578	2.16e-08	0.999776	9.07877	height
202314	-1.58477	8.26e-102	1	-0.639655	height
202426	-0.795302	1.65e-27	0.985895	-1.01438	height
204834	-0.142512	0.0156227	0.984894	0.817889	height
209794	0.549456	1.56e-14	1	0.752985	height
210712	1.1194	2.87e-10	0.999999	2.43389	height
838264	1.354	1.15e-16	0.974039	2.83748	height
838334	5.21972	2.05e-18	0.996582	-11.0895	height
838344	-0.316414	8.11e-16	0.999997	-1.35547	height
838450	-5.50927	8.5e-28	1	-10.2635	height
839268	-3.05335	1.36e-14	0.99978	-9.58121	height
839288	-6.06751	1.96e-15	0.999999	9.85622	height
839302	-45.0151	6.86e-121	0.999999	-36.609	height
845740	-0.117694	5.62e-15	0.994009	0.210162	height
849950	-0.658118	0.0293974	0.953767	-1.38088	height
856986	-2.98421	1.21e-05	0.999933	-10.7902	height
861468	1.44812	5.26e-15	0.999999	6.78293	height
862318	0.0257183	0.610878	0.957458	-4.78105	height
862770	-4.61688	0.00200925	0.981203	10.1041	height
863576	-1.36013	1.99e-14	0.984139	-6.127	height
872068	-2.85835	9.82e-06	0.975101	-4.43002	height
873634	1.0881	1.56e-09	1	1.23264	height
873666	-4.25614	5.88e-36	0.999997	-16.0007	height
876506	-0.345127	1.2e-05	0.976193	-0.286313	height
881250	-0.665004	3.72e-05	0.964092	-2.04366	height
173490	-0.00350249	0.974682	1	-0.916746	height
173768	-0.212725	5.82e-13	0.998677	-0.621454	height
173800	0.243578	0.0240007	0.970609	0.92744	height
173806	1.02239	3.3e-08	1	4.34754	height
176042	-1.87619	3.68e-13	0.989043	-1.52102	height
176366	0.358746	0.00707818	0.99703	-1.96452	height
176378	0.864417	7.94e-08	0.999922	-3.4294	height
177114	-0.530178	0.218479	0.958045	-1.17474	height
184380	0.790901	1.9e-09	0.972825	0.998726	height
185448	0.472447	9.6e-23	0.999995	1.6997	height
189730	0.292841	7.74e-08	0.977483	0.33161	height
191548	-0.106075	0.00128047	0.994866	-0.134129	height
191624	0.42018	0.00011938	0.997816	1.06285	height
194372	-1.13917	0.0250096	0.964926	-5.2624	height
194944	0.331129	0.0325921	0.994182	0.561868	height
194984	0.484579	2.19e-34	1	-1.87645	height
194988	2.00667	0.00914526	0.995132	12.1011	height
198270	-0.592276	7.15e-08	0.999633	-1.09922	height
198556	8.17681	0.00015885	0.966226	15.7331	height
213042	0.186416	0.00167145	0.980027	0.418699	height
216516	0.441402	1.77e-08	0.997492	1.30289	height
216988	-1.5854	0.0026822	0.999512	-3.48312	height
216990	0.631272	7.19e-12	0.997043	-0.949586	height
217018	0.393498	1.04e-45	1	1.6605	height
217046	0.976975	1.66e-07	0.971938	0.736862	height
217048	0.32206	4.03e-07	0.999681	1.5342	height
217134	0.187589	3e-16	0.997544	0.21783	height
221444	-0.126517	0.803011	0.971075	2.50647	height
222058	0.411518	2.75e-08	0.97608	0.342134	height
223870	0.766924	0.0113405	0.976967	0.82651	height
224820	-0.116158	2.04e-13	0.99997	-0.190294	height
233590	3.13366	0.000903921	0.987308	1.25158	height
235174	-0.220023	2.17e-17	0.995284	-0.233885	height
235392	-0.0810168	0.1246	0.993404	0.388638	height
236216	-0.401691	1.04e-05	0.997759	0.501965	height
236980	-0.746911	4.61e-09	0.99392	-0.839298	height
238040	-0.241506	0.629888	0.985099	-5.89362	height
238922	0.284006	0.0507374	0.974984	-1.66043	height
238956	0.480799	7.37e-09	0.999991	1.44233	height
238980	0.0101994	0.950565	0.998674	-0.929291	height
239092	1.07265	0.0192286	0.99842	11.7805	height
239738	0.102228	1.2e-13	0.992186	0.145775	height
239872	0.515067	0.00619641	0.989402	3.04783	height
239942	1.42232	3.36e-22	0.996848	-1.14257	height
240036	0.736027	1.97e-07	0.99999	0.976418	height
241504	9.4334	0.0540065	0.998633	13.5064	height
242154	-2.02555	4.6e-09	0.99993	-1.83629	height
242888	-0.678829	1.39e-09	0.952393	-0.333833	height
244752	-0.443843	0.348843	0.955851	-4.2512	height
246712	-0.349578	6.53e-13	0.980551	-0.68205	height
248978	-3.49301	6.33e-28	1	-3.38136	height
249748	-1.0429	4.01e-18	0.998084	-2.38246	height
249752	-1.78586	4.32e-20	0.999991	-0.970984	height
249838	-0.221887	3.02e-05	0.98455	-0.335719	height
249850	0.877471	2.36e-44	0.999997	1.10336	height
249882	0.424917	1.67e-20	0.999998	0.683427	height
250252	0.10533	0.161019	0.997131	1.35904	height
250394	1.65543	1.57e-07	0.980304	1.36119	height
250500	-0.214009	0.00176628	0.951266	-0.299815	height
250518	0.0701652	6.47e-09	0.999879	0.156025	height
250564	0.332266	1.01e-07	0.99327	0.491056	height
250566	0.949996	1.05e-10	0.999974	3.66802	height
251634	-1.4639	1.72e-19	1	-1.65488	height
251652	-10.5497	1.48e-75	0.999997	12.9879	height
251674	-0.738893	0.00200074	0.997751	-1.64922	height
252730	-0.356095	1.38e-26	1	-1.85797	height
885718	-1.43488	0.0101169	0.96115	-4.02782	height
894786	-5.37015	7.84e-18	0.991498	-10.6239	height
894824	-3.43535	5.27e-06	0.997389	-3.43654	height
896560	-2.83875	9.86e-29	0.991475	-3.64183	height
900792	-1.34966	2.5e-43	0.968797	-1.06702	height
902790	1.25487	0.00839409	0.974065	1.90794	height
904428	0.0922677	0.934753	0.998301	-4.58919	height
913088	-1.8945	2.36e-05	0.958704	2.02558	height
915096	3.03923	0.457494	0.97876	14.5086	height
925632	1.15153	2.02e-19	0.960996	1.80802	height
925660	0.465925	0.0571599	0.99766	-5.49128	height
925670	2.57392	1.68e-24	0.995903	1.9028	height
925740	-0.15736	0.532572	0.955905	0.95126	height
925742	1.7303	0.167573	0.995451	-14.353	height
926318	-0.71192	0.310583	0.998018	1.78407	height
253550	0.575037	9.9e-09	0.99748	1.11987	height
255324	-0.655132	6.45e-16	0.990392	-0.542678	height
255472	0.691996	6.48e-08	0.999354	2.51546	height
255480	-0.611691	0.0174372	0.967837	-2.80083	height
255650	-0.351947	6.7e-105	1	1.23164	height
255684	-0.164183	0.619726	0.999998	2.72473	height
255738	-0.907603	1.67e-06	0.999852	-1.90685	height
257364	0.148732	7.49e-08	0.996692	0.102443	height
259328	0.389231	1.72e-11	1	-0.737731	height
259346	-1.3702	1.55e-05	0.959077	-4.44044	height
259430	0.0460109	0.0393968	0.995782	-0.619408	height
261082	0.139712	0.0164873	0.999971	-0.857306	height
261094	0.485988	1.77e-35	0.999859	0.618162	height
261184	-0.461912	3.66e-61	1	-0.384884	height
261464	1.0634	9.9e-08	0.984622	2.42009	height
261648	-0.678027	2.13e-08	0.978029	-0.651194	height
261684	11.421	0.0101066	0.998828	10.8304	height
261766	-0.578291	5.08e-13	0.960759	1.06316	height
261920	-0.896778	2.41e-14	0.999989	-2.9208	height
262174	-0.398561	2.45e-26	0.999999	-0.217968	height
262220	-2.04521	2.15e-09	0.998937	-1.22592	height
262492	-0.000433726	0.972434	0.999999	1.41738	height
262562	-0.447412	1.66e-11	1	-2.70151	height
262572	-0.314769	0.000104713	1	-2.12636	height
262612	1.07977	7.46e-43	0.999998	-1.33811	height
262650	8.2047	4.84e-05	0.999848	14.0708	height
262690	3.40197	3.93e-05	0.99858	2.46921	height
262724	2.13396	0.0146168	0.999968	-7.34138	height
262790	0.798565	2.04e-22	0.999282	0.695253	height
262834	0.00730245	0.956159	0.971703	-0.465176	height
263008	-0.0839343	2.43e-06	0.960676	-0.323735	height
263132	2.38	2.45e-18	0.995934	4.27499	height
263350	-2.71284	4.17e-09	0.984646	-3.85149	height
263358	3.45808	5.69e-06	0.999999	14.1662	height
263554	1.06908	1.89e-51	1	1.70889	height
263556	2.1282	1.6e-20	0.999999	-2.18772	height
263678	1.16055	0.00395032	0.951063	1.11242	height
263696	-1.28552	1.13e-92	0.999618	-0.947468	height
263710	0.582243	7.33e-64	0.966404	1.15975	height
263786	2.34486	8.12e-52	0.997441	3.3679	height
263812	2.00144	1.4e-08	0.998082	11.8109	height
263860	0.432183	1.15e-17	1	2.78771	height
263908	-0.377841	1.39e-09	0.999316	1.29759	height
263938	-5.22738	9.52e-05	1	-10.3577	height
263956	13.8698	2.02e-30	0.999919	10.7699	height
263984	1.04929	5.65e-25	0.991074	0.60943	height
263992	0.617261	0.420074	0.999968	15.3014	height
264192	2.12281	0.0130822	0.999948	1.56993	height
265472	-0.216349	0.405728	0.984536	-1.0151	height
265668	-1.13058	1.51e-07	0.99619	-2.29364	height
266156	-3.0754	4.77e-08	0.994803	-6.14162	height
266326	-0.0181551	0.892169	0.980523	0.549819	height
266342	-0.0213828	0.125572	0.999738	1.08333	height
267124	-2.39333	1.89e-07	0.982415	-2.19151	height
267288	-0.440974	3.54e-06	0.995597	-0.326871	height
267624	-0.26125	0.653323	0.998161	-4.64107	height
267642	-2.00825	7.51e-09	0.998711	-1.41049	height
268098	3.18991	1.37e-07	0.99981	2.15365	height
272544	-22.9652	1.23e-21	0.993121	-18.8579	height
273320	0.540472	8.88e-12	0.989298	0.818683	height
273356	-0.335118	4.92e-07	0.983703	-0.954596	height
273504	10.5059	1.78e-05	0.996548	14.4958	height
273570	-0.397009	4.62e-12	0.994263	-0.525269	height
273862	-1.85921	4.9e-09	0.970476	-6.69502	height
277336	-0.256297	1.52e-93	0.999998	-0.636036	height
277680	-0.0959714	0.0240639	0.9906	0.134996	height
278590	0.953278	2.4e-07	0.993521	1.2922	height
280658	0.600454	2.28e-05	0.988993	-0.867887	height
280668	-14.0027	0.000556275	0.950012	-6.91465	height
280754	-0.26138	4.49e-11	0.986271	-2.04837	height
280940	-0.196439	7.47e-24	0.98128	-0.130813	height
281034	1.19768	1.22e-12	0.994382	0.548242	height
282958	-8.66338	1.09e-54	1	-9.00764	height
283682	-0.271407	7.67e-14	0.999243	-1.48382	height
283832	0.0802297	0.00246978	0.99981	0.608383	height
283846	-5.25701	1.74e-69	0.980746	-13.4025	height
283854	3.29136	3.39e-08	0.99915	3.9207	height
284128	4.38022	1.92e-22	1	16.7199	height
287692	1.13106	8e-84	1	1.09619	height
290634	6.41603	3.4e-15	0.991844	4.37739	height
290638	4.89941	4.13e-45	0.99861	3.16532	height
290960	0.403502	1.69e-06	0.967817	1.02552	height
291470	-0.125258	0.000844594	0.981139	-0.305955	height
292520	-0.543741	1.35e-05	0.999804	-0.562274	height
293204	4.71438	1.06e-10	0.986009	8.56372	height
294458	-0.26684	1.71e-07	0.980222	-0.142848	height
294584	0.0463689	0.00760546	0.991182	0.411897	height
295378	-1.27134	1.22e-23	1	-1.98016	height
295398	-4.85171	5.9e-23	0.999958	-3.12577	height
295412	0.632454	0.00703873	0.995574	3.96981	height
927110	5.11218	2.81e-18	0.999942	16.9708	height
930646	20.0244	2.44e-22	0.996399	11.6893	height
930888	-14.4688	7.21e-10	0.999939	-20.0813	height
931640	-4.22352	2.34e-12	0.99996	-4.38995	height
931696	-1.4271	9.46e-32	0.999995	-6.25176	height
931706	0.861706	3.38e-10	1	-3.65281	height
931800	-0.868556	7.79e-26	1	-1.83784	height
931916	17.1055	2.89e-10	0.999999	-19.0462	height
932694	-1.28462	0.000378491	0.999964	7.36203	height
932702	-3.12297	4.05e-19	0.999999	-2.3755	height
932896	-11.5677	1.79e-19	0.999	-14.2966	height
935394	0.0595472	1.02e-05	0.974133	0.286749	height
942098	1.99203	1.24e-27	0.999984	4.28962	height
943568	5.00803	0.0580516	0.9705	-14.7795	height
943644	25.2247	1.95e-15	1	29.7784	height
944330	1.02718	1.83e-13	0.971485	1.15053	height
952800	-8.89044	0.00645747	0.999162	20.1648	height
955034	-13.1269	1.21e-14	1	-29.7672	height
955066	66.9267	0.000902329	1	57.2958	height
955918	3.31649	2.55e-09	0.991246	2.51532	height
956372	-0.205204	3.86e-05	0.956833	-0.101186	height
956542	-0.297805	0.0221554	0.975949	3.75283	height
958978	5.64177	1.87e-34	0.981563	4.59367	height
959894	3.12797	1.55e-05	0.967044	4.90285	height
960894	-2.96641	1.26e-16	0.999707	-19.3214	height
961370	3.9612	0.00062377	0.999408	12.9881	height
961796	-4.78177	1.03e-13	0.98395	-20.9189	height
297144	1.21451	1.43e-05	0.958592	0.91427	height
297222	1.07334	0.00082962	0.957606	3.42253	height
297276	1.50743	6.1e-132	1	-1.15668	height
297996	0.15034	1.19e-07	0.994434	1.08987	height
298016	0.259638	1.42e-06	0.968099	0.564586	height
300868	-0.851448	0.000822586	0.971715	-3.12314	height
300912	0.863592	0.000157665	0.99891	0.715649	height
301030	-0.729187	4.33e-13	0.957578	-1.20947	height
301226	-1.39806	1.89e-30	0.997412	-1.023	height
301990	-0.179005	0.00251345	0.996433	-0.565916	height
302018	0.415115	2.12e-12	0.982392	0.144014	height
302074	0.929822	4.1e-30	1	1.23169	height
302076	-0.346149	1.39e-45	0.992849	-0.821273	height
302092	0.130905	4.71e-50	0.99981	0.36509	height
302572	-2.84617	7.18e-09	0.977154	-2.72388	height
302608	-0.6069	3.24e-06	0.999825	-0.654818	height
302640	1.2082	3.84e-09	0.999999	1.45195	height
303358	3.47635	2.94e-88	0.999758	2.36678	height
303546	3.07231	4.2e-05	0.98738	1.03894	height
306264	-0.330869	0.000381843	0.983936	-0.2657	height
308598	-0.421729	0.490461	0.999992	-1.87529	height
308700	0.109649	0.0511105	0.977311	0.860017	height
308828	-0.0847013	2.42e-07	0.999903	-0.257375	height
310638	-0.194112	2.46e-12	0.999216	1.8369	height
311522	2.24737	1.44e-06	0.977143	2.11799	height
311816	-0.645095	6.11e-06	0.955352	-1.88647	height
316824	-1.22014	3.09e-127	1	-5.08007	height
316884	-1.89107	1.76e-24	1	-1.07668	height
317724	-1.42683	2.38e-07	0.955243	-1.27853	height
319226	-0.946197	8.45e-07	0.994026	-4.54502	height
319572	0.565097	4.34e-09	0.9894	0.553878	height
320446	-0.00741827	0.975909	0.988237	0.682366	height
323720	0.459784	8.75e-14	0.967804	1.52382	height
326090	-0.34119	9e-08	0.968184	-0.159236	height
327138	-0.236642	3.17e-17	0.978353	-0.986365	height
327400	-0.352575	2.13e-05	0.994906	-2.58571	height
327982	0.452714	6.26e-10	0.981305	0.755059	height
328762	-0.762281	0.00192691	0.996784	1.78457	height
330442	-0.144812	8.01e-29	1	0.603929	height
330444	-0.133674	0.732894	1	6.32771	height
331008	1.91859	0.00715419	0.998249	8.4508	height
331066	-1.96329	1.7e-16	0.992639	-8.53133	height
331220	-5.30896	2.08e-05	0.989943	-4.21314	height
331224	0.595795	4.05e-07	0.965392	0.696443	height
965898	4.36724	0.0278999	1	41.8296	height
967844	-0.588542	0.00307819	0.999266	-0.167083	height
969068	0.20611	0.00375857	0.980061	1.3161	height
969110	-0.787396	1.91e-11	0.9818	-0.733949	height
970164	-0.739851	9e-07	0.999993	2.09612	height
970422	1.63482	3.32e-06	0.974296	7.56234	height
984176	2.99965	9.45e-07	0.984465	4.3665	height
984504	-0.357674	1.11e-07	0.997323	-1.5934	height
985034	-0.348215	0.000913991	0.994387	-1.99582	height
990536	-0.717437	5.9e-09	0.990326	-0.661651	height
993584	1.52928	3.39e-11	0.981417	6.45797	height
995902	-3.922	3.44e-33	0.99981	-6.40674	height
336104	0.589823	1.21e-09	0.999977	0.530644	height
336128	0.292621	0.00897482	0.973961	1.06244	height
338620	-2.76734	1.64e-18	0.999429	2.79367	height
338664	-0.00193408	0.935679	0.997277	-0.797531	height
338718	-11.2351	0.00105428	0.981592	-14.3977	height
338736	1.87217	2.89e-07	0.999908	2.65188	height
339900	-0.156563	4.38e-13	0.998843	-0.501677	height
343268	-0.0509668	0.00568855	0.99545	-0.262396	height
344510	-0.216249	0.000185465	0.998771	-0.527584	height
345802	-0.270909	0.0260816	0.965927	-0.364745	height
345860	-1.05181	3.9e-07	0.999957	2.33157	height
345920	-0.229626	0.0801136	0.999997	0.987219	height
345936	3.09192	5.22e-07	1	-27.5238	height
349988	-0.90219	2.69e-15	0.999094	-3.32884	height
353762	-0.790351	0.0967581	0.997113	3.83631	height
356646	3.12942	6.16e-06	0.978216	3.07053	height
356928	4.89769	2.57e-05	0.995571	4.68703	height
358918	-0.97606	9.82e-20	0.999953	-0.808795	height
359054	-1.17636	9.74e-13	0.994863	-1.16353	height
359986	0.285091	2.7e-09	0.998528	0.431217	height
359990	-0.0717579	0.686802	0.97478	-0.794984	height
361048	1.67049	2.12e-15	0.998117	3.75454	height
361738	-0.301205	6.44e-10	0.998334	-0.852278	height
361846	-16.6052	1.41e-21	0.99129	-20.0004	height
362192	-0.825522	6.34e-11	0.992316	-0.978141	height
362250	-0.822846	4.27e-12	0.999828	-2.01794	height
362256	15.6613	2.13e-23	1	15.4207	height
362258	0.270607	2.66e-07	0.999112	0.380061	height
363410	-0.0902922	0.00300668	0.999914	-1.35867	height
363624	0.530562	0.0141876	0.989641	-4.07461	height
363688	-1.26674	7.17e-16	0.977412	1.8342	height
364998	0.0269223	0.94474	0.981993	2.61653	height
365668	-0.576668	2.65e-09	0.994176	1.76103	height
366042	6.16141	1.6e-16	0.997865	-3.56074	height
1001140	-6.00377	2.45e-08	0.954918	-5.5213	height
1004088	-1.60037	6.63e-05	0.96459	-1.17003	height
1009284	-0.800327	0.203648	0.973233	-14.1945	height
1011050	1.00047	0.00104771	0.999836	6.11498	height
1011060	1.72175	0.545146	1	8.64063	height
1011072	-31.0974	4.23e-48	1	-42.9162	height
1011222	-3.77017	2.72e-05	0.956861	0.871796	height
1014104	-2.14396	1.19e-06	0.988741	-1.18669	height
1015522	-1.26543	0.00162278	0.984679	3.45942	height
1015580	1.4134	3.3e-06	0.999085	1.56639	height
1016252	10.2731	1.98e-59	0.999397	25.9116	height
1021198	-1.199	0.0653523	0.969976	-6.34173	height
1026160	-22.2797	6.74e-21	0.999985	-23.4921	height
1026386	4.10354	5.65e-08	0.985565	-5.74807	height
1026890	-6.15996	4.98e-23	0.954033	-9.44216	height
1029048	-24.0069	4.86e-38	0.993503	-28.6648	height
367078	0.191374	0.00582032	0.98806	0.562836	height
368266	0.529369	0.00464298	0.993896	0.575101	height
370326	0.157358	6.83e-15	0.995485	0.572103	height
370390	-14.1736	3.69e-08	0.967789	-9.79127	height
373984	-1.18352	3.14e-10	0.976139	-1.77207	height
375580	-0.0271985	0.964207	0.962214	-1.66991	height
377074	-0.403042	0.000119687	1	-0.96996	height
377092	0.382478	8.02e-08	0.986793	0.475566	height
379688	-0.634071	2.82e-13	0.9917	-0.988127	height
379694	0.69571	1.35e-10	0.999992	0.707876	height
379696	0.384217	1.68e-08	0.999275	1.40286	height
379978	-0.400301	2.03e-06	0.970175	-0.322347	height
380274	4.34181	6.45e-07	0.99526	-8.05596	height
380340	0.497405	0.0313941	0.999902	6.5175	height
380746	0.114938	0.000139118	0.975538	0.314319	height
381802	-1.2887	6.86e-07	0.999349	-2.72534	height
382032	-0.0637904	0.554875	0.962278	-1.21051	height
382068	-0.0639675	1.02e-09	0.973695	-0.20202	height
382294	0.20386	4.8e-23	1	0.147696	height
382584	-0.234509	5.06e-22	0.993009	-0.832897	height
382704	8.83489	4.27e-26	1	5.2406	height
382734	2.38945	0.0671176	0.99983	-5.89193	height
382736	-9.34896	4.93e-20	1	-13.1874	height
382770	1.73957	4.64e-47	1	0.884923	height
382776	-1.69454	2.3e-29	0.998611	-0.753659	height
383590	0.675484	2.81e-05	0.999866	0.823836	height
383990	3.96307	2.41e-09	0.996505	-12.5604	height
384550	1.00096	7.45e-08	0.97044	7.13158	height
385404	-0.489279	3.43e-20	1	-0.463545	height
385418	0.824411	6.44e-33	0.997673	5.39487	height
386954	0.197492	0.00234753	0.999591	0.639406	height
387048	-2.67884	1.43e-16	0.998436	3.32622	height
388196	-0.0488705	2.27e-07	0.997706	-0.0537914	height
388446	-0.400787	3.07e-08	0.985545	-2.28889	height
388808	0.41113	1.19e-13	0.999634	0.52334	height
388882	-5.90166	7.59e-38	1	-6.60574	height
393562	1.02694	2.1e-15	0.999882	-4.69614	height
394982	0.0734206	9.96e-07	0.976754	0.205101	height
395800	1.81146	2.15e-16	0.960672	2.11011	height
395838	1.17766	6.43e-15	0.998664	1.70724	height
1040022	-0.570382	0.00544509	0.966381	-1.22242	height
1058328	-0.537274	0.00313796	0.994888	-3.76259	height
1059132	2.6265	6.48e-10	0.998018	2.39158	height
1059424	1.23086	4.01e-14	0.997629	1.30079	height
1059438	3.76322	0.157228	0.998874	-16.0897	height
1059462	-2.65921	1.45e-08	0.989596	-1.6508	height
1061830	14.8801	0.726948	0.994963	-29.1845	height
1062902	-0.259473	0.00881338	0.961977	3.69912	height
1065230	1.59793	2.81e-15	1	0.353012	height
400880	-0.282435	1.58e-06	0.953276	-0.255065	BMI
402962	1.12707	5e-21	0.983552	1.04682	BMI
404890	-1.54397	1.68e-06	0.976027	-1.42238	BMI
419284	1.71723	1.18e-09	0.995693	1.52252	BMI
423410	7.76274	4.09e-12	0.976573	6.85823	BMI
430914	6.34702	1.14e-11	0.966322	5.38088	BMI
1070886	14.5403	1.41e-09	0.99033	12.7706	BMI
1076148	-6.5047	5.09e-07	0.987204	-6.24216	BMI
1078578	-0.738302	1.25e-07	0.990088	-0.71328	BMI
1081538	-2.63998	3.39e-08	0.998071	-2.53946	BMI
1085288	0.36292	2.4e-06	0.958374	0.375262	BMI
1089644	-1.18349	2.62e-08	0.953844	-1.08239	BMI
441998	-0.0120884	0.792364	0.999769	-0.571978	BMI
443828	-0.476768	0.000178713	0.953901	-1.16959	BMI
447970	-0.329754	0.546298	0.96922	6.2209	BMI
459484	-0.228636	0.00149403	0.992835	-0.479504	BMI
459496	1.29909	0.00090773	0.999263	-3.41148	BMI
459572	0.746519	0.000175659	0.98558	1.59014	BMI
465442	-1.02726	0.0222653	0.998743	0.811826	BMI
465648	1.32108	2.92e-05	0.997808	0.808825	BMI
1094960	-0.665363	4.3e-09	0.999612	-0.423313	BMI
1097190	0.463908	2.89e-08	0.976385	1.77473	BMI
1097952	0.244255	0.462354	0.956259	-15.3966	BMI
1111198	4.45428	0.586011	0.995242	-2347.48	BMI
1114936	1.84151	0.427772	0.990086	-2235.88	BMI
1117712	4.79002	9.91e-09	0.973853	4.16053	BMI
1119060	1.84305	0.0188262	0.99784	4.34425	BMI
466182	-0.48913	2.82e-12	0.99988	-0.438093	BMI
477904	-0.805019	0.000871544	0.989662	-1.37907	BMI
478524	0.0349158	0.000906324	0.999257	0.149734	BMI
478526	-8.62713	1.96e-23	0.983634	-4.30225	BMI
478528	0.861164	9.19e-16	0.999087	1.33023	BMI
480728	-0.349388	5.87e-09	0.996213	-0.816196	BMI
492400	0.198493	9.88e-07	0.950185	0.217031	BMI
493106	0.0636903	0.568822	0.982291	1.1214	BMI
498354	-1.06922	6.03e-17	0.99626	-0.911188	BMI
1124094	-0.405777	1.76e-05	0.993319	-1.35058	BMI
1132422	0.674018	4.93e-05	0.980709	4.09913	BMI
507024	0.552333	0.126296	0.996941	1.24732	BMI
517198	-0.922636	7.99e-06	0.995761	-0.386974	BMI
1151584	-1.68294	7.48e-12	0.999978	-3.82477	BMI
1153390	-1.94345	0.0334986	0.99865	7.80818	BMI
1153740	0.570299	3.88e-09	0.998485	4.24777	BMI
1159974	-0.886395	3.04e-08	0.983169	-0.805238	BMI
523296	-1.84035	5.87e-12	0.998402	-5.56263	BMI
531318	-2.48234	3.75e-07	0.996387	-1.08501	BMI
535596	-0.631289	1.15e-08	0.998468	-0.506024	BMI
536216	2.62055	1.06e-14	1	11.3295	BMI
538512	0.476532	3.66e-10	0.970543	0.822843	BMI
541686	1.67346	3.64e-05	0.984925	1.4863	BMI
541698	-0.114914	0.212917	0.961529	-0.310859	BMI
1182842	-3.31356	1.41e-06	0.997349	-3.88808	BMI
1182876	-0.768438	0.000616611	0.951678	-0.602149	BMI
551870	-1.22003	1.66e-11	0.999967	-2.06247	BMI
554522	-0.148253	7.2e-05	0.9536	-0.157969	BMI
556774	-0.174654	0.0178182	0.980083	-0.209408	BMI
557254	1.44986	2.14e-19	0.968373	1.27571	BMI
560876	-0.963956	2.26e-05	0.982367	-1.62282	BMI
561406	1.58276	1.75e-11	0.998536	3.18838	BMI
561848	0.161703	4.57e-11	0.985403	0.317457	BMI
564220	0.14019	0.406697	0.966647	1.16931	BMI
565190	-0.245581	0.0254288	0.958925	-0.118053	BMI
1199654	1.34615	1.57e-10	0.995669	0.765126	BMI
567922	0.248122	1.76e-08	0.97375	-0.49931	BMI
569522	-0.118217	1.15e-06	0.964681	0.694502	BMI
570472	-0.224574	5.24e-05	0.963981	-0.164221	BMI
575234	-0.00238618	0.868629	0.95684	-0.273697	BMI
575686	0.482966	0.542226	0.969025	3.00815	BMI
576642	-1.7239	9.48e-16	1	3.54587	BMI
578898	1.64488	3.07e-36	0.999998	2.08165	BMI
583020	0.277665	2.86e-12	0.993883	1.4783	BMI
583650	-6.56773	3.52e-07	0.995973	-4.04748	BMI
583896	-0.366535	0.0464903	0.994328	-0.608276	BMI
1202178	-0.251192	0.000548283	0.977862	-1.26033	BMI
1202388	-0.107566	0.689664	0.980981	-2.72407	BMI
1202674	1.13797	0.000958192	0.971735	6.49936	BMI
1204684	7.02392	1.63e-07	0.998408	7.57064	BMI
1206352	-2.89589	6.75e-25	0.997424	-3.75578	BMI
1215344	-0.0658279	0.589168	0.99801	3.32776	BMI
1215346	7.74315	1.38e-136	1	14.9297	BMI
1220918	-2.86387	0.135214	0.986651	9.82649	BMI
596508	-7.76477	5.11e-06	0.996214	13.3638	BMI
599722	-0.410458	7.07e-05	0.970981	0.947349	BMI
603940	-0.49553	4.34e-05	0.997618	4.09669	BMI
606370	-0.0784644	0.0185059	0.99709	-0.233224	BMI
609906	-1.26352	4.84e-06	0.962846	-0.933164	BMI
614748	0.229352	1.08e-05	0.996586	0.0647074	BMI
1222118	0.587	5.47e-06	0.952059	0.636253	BMI
1229060	-0.895535	6.65e-07	0.993901	-1.13771	BMI
1233614	0.709564	0.211315	0.968335	3.78856	BMI
628700	-0.674308	0.614594	0.955907	12.6405	BMI
629158	-1.23624	0.000411312	0.978921	-3.6757	BMI
1248464	1.42836	6.46e-06	0.996795	7.07613	BMI
1248550	-0.934558	9.62e-12	0.952503	-0.353264	BMI
1248604	11.934	2.48e-62	0.999988	12.7402	BMI
633232	0.47659	2.99e-08	0.980634	0.257067	BMI
633612	0.243847	2.08e-07	0.99115	0.42681	BMI
633746	0.611613	0.0183419	0.957019	0.970146	BMI
640232	-0.272292	1.68e-07	0.999794	-0.389211	BMI
642068	1.65469	1.73e-05	0.994904	3.89054	BMI
642140	-1.14651	7.78e-06	0.971663	-1.07542	BMI
647060	0.756952	0.00724417	0.999866	3.08398	BMI
647434	0.442448	1.8e-24	1	0.428881	BMI
648014	-0.916672	2.07e-07	0.994908	-1.74249	BMI
648020	-1.66744	1.68e-07	0.999892	2.09831	BMI
648882	0.101947	0.000250066	0.978329	0.488994	BMI
649538	0.610157	0.00512459	0.971644	-0.285076	BMI
21570	-29.5492	5.1e-10	0.99989	-27.5258	BMI
24152	1.87283	4.13e-21	0.990458	1.67407	BMI
31956	0.688996	8.71e-12	0.997702	0.653957	BMI
3712	-0.334978	7.67e-08	0.950564	-0.301052	BMI
370	0.187171	1.52e-13	0.999331	0.19368	BMI
38500	-1.60049	8.16e-18	1	-1.35613	BMI
43882	-6.59057	3.98e-15	0.979609	-5.55857	BMI
44856	2.36785	1.84e-50	1	2.32089	BMI
456	-0.633029	4.25e-10	0.999848	-0.672117	BMI
48340	2.55843	1.83e-07	0.95036	2.29415	BMI
62524	-1.56115	6.12e-08	0.998389	-1.51153	BMI
62860	-1.81083	9.69e-10	0.985234	-1.79161	BMI
6728	0.187885	2.05e-08	0.957073	0.179284	BMI
696618	-1.7025	1.99e-07	0.988261	-1.66298	BMI
706538	-1.88336	4.78e-08	0.999787	-2.03922	BMI
8152	-1.13536	7.23e-09	0.981889	-1.00697	BMI
14414	-2.28378	8.93e-07	0.960927	-2.19521	BMI
15664	1.06556	1.73e-07	0.962856	0.919298	BMI
19046	-0.179971	4.44e-08	0.974088	-0.171876	BMI
653972	0.467041	0.853523	0.987816	7.65362	BMI
656608	-0.364256	4.02e-05	0.999993	-1.67957	BMI
665318	-0.596385	0.00716056	0.9538	5.2287	BMI
670354	-0.198427	0.000789592	0.970994	-0.724464	BMI
676504	-0.987836	1.18e-06	0.959506	-0.903976	BMI
678530	-0.311451	1.65e-10	0.994073	-0.648422	BMI
64346	0.544685	2.22e-07	0.978434	0.5644	BMI
64402	1.1316	9.48e-14	1	1.03663	BMI
64410	-1.53277	9.49e-17	0.983766	-0.47467	BMI
65504	0.395906	8.07e-07	0.989909	0.870138	BMI
67934	0.0513754	1.65e-05	0.982953	0.170094	BMI
68402	1.58626	1.43e-07	0.990688	2.17477	BMI
70756	1.73965	1.12e-29	0.99989	2.18345	BMI
71506	1.76261	1.9e-05	0.994942	2.29047	BMI
742892	0.253224	1.43e-07	0.994129	-1.22471	BMI
744232	8.99611	7.89e-07	0.998395	7.71017	BMI
753954	-4.13496	0.0303198	0.996764	-6.35349	BMI
761664	12.4123	0.162219	0.953806	137.272	BMI
777826	1.23851	1.09e-08	0.984522	8.38477	BMI
779670	-0.0210771	0.948629	0.96224	-6.07825	BMI
781066	1.25416	0.0273566	0.954727	6.61745	BMI
785802	-2.71053	0.176816	0.980841	-27.0001	BMI
789942	4.41585	4.53e-09	0.999945	5.74526	BMI
791414	-3.41978	9.74e-06	0.970934	-6.44315	BMI
791932	-1.07317	6.83e-08	0.960169	-0.987477	BMI
80118	-0.960792	1.03e-07	0.979299	-0.975744	BMI
80510	-0.0433808	0.142126	0.999239	-0.190592	BMI
82914	-0.0934907	6.82e-07	0.997787	-0.140314	BMI
90498	-0.351024	3e-08	0.980492	-0.328084	BMI
100968	-0.229495	3.49e-06	0.962805	-0.362783	BMI
113052	0.314338	5.34e-06	0.968195	-0.491807	BMI
113802	-0.431628	5.39e-05	0.995064	-0.847713	BMI
119700	-0.37853	5.74e-16	0.964693	-0.525998	BMI
794812	-5.66736	0.000372237	0.968821	-10.4181	BMI
798196	-1.38941	0.0258949	0.954925	-10.8436	BMI
811700	0.458559	0.00585829	0.987515	3.43992	BMI
812560	7.21348	2.1e-07	0.981779	4.9463	BMI
818218	-4.56902	1.65e-06	0.99445	-6.00279	BMI
820170	0.119948	0.520637	0.99547	-0.882748	BMI
822320	-0.344539	0.0830046	0.996182	-2.38982	BMI
126854	0.428054	0.00465264	0.966075	0.543043	BMI
137864	0.897917	0.00396383	0.999807	10.5847	BMI
138136	-0.777095	1.21e-05	0.968005	-1.01302	BMI
158722	0.886061	6.63e-10	0.98987	1.14846	BMI
163622	-0.321093	0.653766	0.992371	11.6273	BMI
165044	0.255697	1.02e-10	0.990143	0.302662	BMI
165858	0.14351	1.67e-09	0.988828	0.706144	BMI
842064	-6.4127	2.37e-11	0.967775	-18.5917	BMI
846930	1.61286	3.14e-30	0.99998	1.5733	BMI
860138	-0.118425	6.79e-06	0.991254	-0.109979	BMI
861996	-2.8749	4.94e-12	0.996803	-2.17596	BMI
885018	1.27928	0.435808	0.965379	23.441	BMI
173794	-1.4319	0.00172951	0.966386	-4.24703	BMI
179652	-0.0838219	0.417211	0.999949	-0.266246	BMI
194384	6.93869	0.0205793	0.995877	17.5424	BMI
219912	-0.19503	2.33e-06	0.993617	-0.198423	BMI
227566	-0.546933	0.185356	0.973601	-8.92526	BMI
236666	0.0565505	1.31e-08	0.952868	0.0803335	BMI
239732	-0.484286	4.15e-06	0.994925	-0.216143	BMI
885358	-0.244766	5.08e-06	0.962709	-0.531282	BMI
886466	-1.48251	0.541763	0.985786	2214.46	BMI
893372	28.8228	0.885765	0.999233	2522.29	BMI
921396	-0.0225993	0.997462	0.960581	-8.9372	BMI
926386	0.972913	2.59e-05	0.958694	5.03088	BMI
256804	-4.84282	1.79e-05	0.965527	-7.43801	BMI
262520	-0.0898201	0.00115988	0.975847	-0.202843	BMI
262866	-0.398257	2.86e-05	0.999341	-0.242168	BMI
263498	-0.00820671	0.915087	0.987657	-1.47494	BMI
263762	-0.0205911	5.12e-10	0.982617	-0.0845803	BMI
263972	-0.14607	3.01e-15	0.999379	-0.109688	BMI
265828	-0.0877597	1.44e-07	0.999954	-0.602055	BMI
265836	4.32251	4.05e-17	0.999998	1.95344	BMI
268844	1.10257	2.77e-15	0.994623	0.383282	BMI
269970	-0.0932624	8.98e-06	0.98261	-0.225496	BMI
287826	-1.73855	9.13e-08	0.97923	-1.01934	BMI
928036	-4.97953	0.685573	0.998487	-2492.68	BMI
929652	2.22939	0.0186881	0.962569	-7.77977	BMI
931932	1.19188	2.02e-05	0.993188	-1.28609	BMI
946672	-3.3959	5.27e-06	0.969614	-2.86315	BMI
949118	-2.70089	4.22e-08	0.989906	-2.44825	BMI
955640	6.17696	9.4e-07	0.989629	4.78019	BMI
298574	0.163525	9.19e-06	0.971701	0.158712	BMI
303348	-0.0386146	5.6e-07	0.998394	-0.137944	BMI
308268	-0.0215196	2.7e-09	0.995282	-0.15541	BMI
308598	-0.610608	0.1811	0.954557	0.752566	BMI
313178	0.672449	5.15e-10	0.974009	1.74686	BMI
314046	0.544673	1.54e-08	0.998963	1.2009	BMI
328410	0.745409	0.0549841	0.99881	9.31628	BMI
328744	-0.874471	0.000329643	0.96525	-1.38893	BMI
331066	-1.16108	6.61e-11	0.994659	-5.41757	BMI
331110	0.0602867	0.246126	0.978219	0.552396	BMI
985642	-0.593076	1.06e-09	0.980886	-3.6124	BMI
334644	0.756782	4.27e-17	0.9927	0.684332	BMI
335416	-0.240354	0.723567	0.963697	-3.29564	BMI
337170	-0.0324695	0.556042	0.988955	1.37823	BMI
338592	0.948895	4.33e-07	0.973061	0.871405	BMI
341444	0.179649	1.44e-05	0.95009	-0.0445666	BMI
358370	1.51005	3.31e-08	0.996366	1.35572	BMI
1006846	-0.779886	0.113118	0.965686	1.36856	BMI
1008696	-134.685	0.0776916	0.954383	-974.416	BMI
1010876	-0.0083962	0.943784	0.967653	-1.21097	BMI
1015792	-0.0175004	0.869573	0.962143	2.26073	BMI
1015970	-0.238705	7.28e-15	0.958596	-0.270626	BMI
1016954			0.999976	-2535.76	BMI
1018528	2.03302	0.00405374	0.998127	10.6156	BMI
1023066	-0.159086	0.0202254	0.951611	1.08259	BMI
370324	-7.29811	8.07e-06	0.999972	-7.52553	BMI
380746	-0.151315	1.84e-11	0.979105	-0.271514	BMI
381370	-1.45884	0.00261861	0.986271	-0.545557	BMI
382164	0.383579	1.61e-10	0.97968	0.400087	BMI
1037718	-6.57381	1.76e-12	0.993472	-6.66384	BMI
1037954	-17.3856	3.94e-18	1	-12.1312	BMI
1061894	-21.2401	1.43e-08	0.989882	-12.6349	BMI
405590	-0.35409	1.87e-24	0.999878	-0.234536	BMD
409970	0.0406251	6.2e-17	0.99982	0.0315422	BMD
409988	0.00716627	7.44e-13	0.999713	0.00683445	BMD
428142	-0.0147692	4.46e-12	0.998788	-0.0126537	BMD
430460	0.0236897	5.25e-09	0.956349	0.0228382	BMD
431136	0.174467	8.01e-11	0.981011	0.132561	BMD
1068214	-0.183	1.91e-06	0.961432	-0.160365	BMD
1070006	30.5866	2.7e-08	0.998999	28.5663	BMD
1070196	0.0447249	9.71e-09	0.996372	0.0428869	BMD
1076164	0.937949	9.99e-30	0.999983	0.672799	BMD
1076174	-1.50439	1.3e-111	1	-1.51613	BMD
436738	-0.00547505	2e-08	0.979177	0.0435157	BMD
437804	0.0184291	8.8e-05	0.971134	0.039071	BMD
438822	-0.0276704	0.0752379	0.98933	0.0918334	BMD
443030	-0.00232453	0.936025	0.992179	-0.35822	BMD
446628	-0.0151221	0.0145071	0.986158	-0.0680631	BMD
447764	0.0402491	6.91e-10	0.953323	0.0262988	BMD
447798	0.0226035	5.91e-26	0.995207	0.0117678	BMD
447854	-0.0174633	6.77e-27	0.987749	-0.0132946	BMD
453526	0.000531706	0.77079	1	0.0738632	BMD
458506	-0.0842873	1.29e-05	0.952876	0.317059	BMD
459490	0.0224062	1.5e-07	0.999839	0.0457559	BMD
459616	-0.0150858	1.17e-05	0.999342	-0.0381213	BMD
459642	0.0514901	0.00190919	0.999403	0.117188	BMD
460776	-0.0453962	3.19e-10	0.996928	0.141735	BMD
463172	-0.0074448	1.43e-09	0.953092	-0.00604956	BMD
1096220	-7.80571	0.0754223	0.999999	83.2633	BMD
1099804	0.052875	0.531047	1	-89.6846	BMD
1106744	-0.00238928	1.47e-18	0.99377	-0.00234914	BMD
1116962	0.0953568	4.56e-65	0.998575	0.0907933	BMD
1117976	-0.26099	6.73e-06	0.987801	0.180219	BMD
465984	-0.0805947	3.15e-19	0.998954	-0.0429602	BMD
466396	0.00361248	3.32e-06	1	0.010314	BMD
466792	-0.0277909	7.88e-07	0.985237	-0.0490642	BMD
470310	-0.0769825	5.54e-17	1	-0.069601	BMD
474382	0.0403032	2.86e-06	0.957761	0.0276185	BMD
478120	0.0288432	6.26e-19	0.999987	0.0135365	BMD
478158	0.0333689	0.000246631	0.959855	-0.0307606	BMD
480150	-0.00718481	0.0221893	0.989136	0.0194786	BMD
488048	0.106209	8.04e-45	1	0.2267	BMD
1125816	-22.3249	0.000323433	0.999997	-36.7339	BMD
1130864	0.0807883	0.0627297	0.98679	61.2754	BMD
1135010	0.0190861	0.818721	0.999209	20.9427	BMD
501392	0.0542946	0.00119195	0.969431	0.288526	BMD
502376	-0.0656126	0.157442	0.998448	-0.234325	BMD
502850	0.0396762	0.00328357	0.956707	0.122812	BMD
505352	0.0173091	5.54e-06	0.988851	0.0409791	BMD
507842	-0.0103972	4.19e-09	0.993693	-0.0202273	BMD
507848	-0.0418831	9.42e-44	1	-0.0939634	BMD
510534	0.00530042	9.06e-17	0.999179	0.00493154	BMD
513476	0.01724	7.82e-06	0.978253	0.0209197	BMD
1160214	0.0249409	0.0937498	0.9961	-0.160822	BMD
528200	0.0253949	9.94e-30	0.999967	-0.0473061	BMD
528204	0.0181835	6.61e-42	0.97934	0.0425736	BMD
533036	-0.0380726	0.0135026	0.960315	0.039739	BMD
1176542	-0.408523	0.283214	0.999991	81.1899	BMD
1177704	0.0407487	0.413266	1	91.0534	BMD
557064	0.00225201	8.1e-10	0.984699	0.00524412	BMD
564628	-0.00628535	1.31e-06	0.995091	-0.0263377	BMD
1188336	0.0277618	0.48728	0.962838	-22.3088	BMD
1193182	0.0244586	0.919615	0.999992	-81.5299	BMD
1195186	0.0168673	0.00198784	0.965003	0.0369418	BMD
1197670	0.00831726	0.530043	0.971982	-0.240348	BMD
567904	0.0160481	2.3e-14	0.998763	0.0183796	BMD
569698	0.00191088	0.680289	0.955772	0.0138054	BMD
571420	-0.0312965	3.07e-06	0.998085	-0.0237392	BMD
578266	0.181865	1.16e-09	0.997169	0.155489	BMD
578308	-0.000480312	0.690646	0.997251	0.0726776	BMD
578452	0.0416184	2.64e-10	0.996654	0.0443315	BMD
579276	-0.00529666	1.09e-07	0.980735	-0.00908945	BMD
582864	-0.00351116	0.656298	0.974024	-0.155849	BMD
586162	-0.0150197	1.47e-09	0.998528	-0.0113172	BMD
1214878	-0.0145966	3.68e-14	0.970332	-0.0792716	BMD
1214894	0.0894475	4.12e-14	0.999995	0.0749192	BMD
1215600	-0.0482459	2.42e-09	0.997983	-0.0544641	BMD
589878	0.165695	2.31e-07	0.998766	0.160693	BMD
590386	0.0213103	3.61e-34	1	0.0408523	BMD
598256	0.0120571	4.2e-07	0.980228	0.0137728	BMD
602506	-0.0153363	8.48e-13	0.998081	-0.00904889	BMD
602522	0.0214452	1.26e-10	1	0.0671066	BMD
602526	0.0162396	4.69e-14	0.984837	0.0358129	BMD
603034	-0.0141129	2.8e-13	0.999582	0.0335625	BMD
604786	0.0157726	0.000555665	0.974549	0.0379912	BMD
604810	-0.0695886	0.00152494	0.985254	-0.0986792	BMD
605194	0.00998785	2.54e-07	0.985579	0.0111845	BMD
1228234			0.974322	-53.3493	BMD
619734	-0.0249851	1.98e-05	1	-0.0428737	BMD
1236098	0.0328423	0.000129897	0.992406	-0.0472479	BMD
1236520	-0.237438	9.61e-18	1	-0.369218	BMD
1244262	-0.0420817	0.887268	0.995305	-29.5661	BMD
1250148	-0.0378813	0.00174273	0.974564	-0.218162	BMD
633884	-0.00367428	5.09e-09	0.987543	-0.00637787	BMD
642818	-0.000250209	0.975693	0.999973	-0.167708	BMD
642834	0.0305738	1.96e-08	0.995289	-0.25319	BMD
645780	0.013184	1.1e-07	0.995131	0.017861	BMD
1256588	-0.209229	0.276071	0.988994	62.4752	BMD
23492	-0.0536049	3.32e-12	0.991428	-0.0413814	BMD
23516	0.0253563	1.22e-22	0.999988	0.021515	BMD
2676	-0.0231897	3.26e-16	0.983825	-0.0210836	BMD
28084	-0.0474533	4.87e-08	0.970581	-0.039007	BMD
42884	-0.587933	2.97e-12	0.995666	-0.537329	BMD
49908	0.0228041	3.27e-09	0.989725	0.0208075	BMD
55842	-0.0167098	6.89e-11	0.951148	-0.0134172	BMD
62238	0.159293	3.18e-69	1	0.0988657	BMD
6714	-0.10471	9.69e-06	0.964094	-0.112757	BMD
694120	0.0604725	1.92e-13	0.980211	0.0395669	BMD
699680	0.364765	2.15e-06	0.951949	0.362641	BMD
699708	-0.00998858	6.94e-19	0.999989	-0.00906394	BMD
701068	93.7939	3.39e-12	1	88.6377	BMD
728676	66.9933	2.06e-12	1	62.5392	BMD
740994	0.159622	7.58e-67	0.995934	0.0822283	BMD
7722	-0.0317183	5.2e-11	0.998945	-0.0316592	BMD
7840	-0.0107949	6.68e-45	1	-0.00828896	BMD
654552	-0.00607439	0.0388297	0.952328	0.0130823	BMD
655436	-0.00207793	2.16e-06	0.999877	-0.0154119	BMD
655512	0.0657718	2.45e-14	0.983532	-0.00817094	BMD
655520	0.0239709	2.76e-06	1	0.00950676	BMD
655562	0.518783	0.166732	0.999504	0.404806	BMD
655622	0.316982	1.87e-26	0.992533	0.204048	BMD
664572	0.0466768	2.07e-10	0.99992	0.0732864	BMD
666778	0.0166499	2.02e-06	0.951785	0.0153226	BMD
668218	0.0263581	1.03e-06	0.983904	-0.0605827	BMD
1262976	0.0175822	0.855619	0.999811	73.8605	BMD
1263192	-0.0209681	6.4e-16	0.999996	0.138779	BMD
676092	-0.0176242	0.136	0.999507	0.129041	BMD
1279402	0.664282	0.0885246	0.985291	5.00509	BMD
746598			1	92.3699	BMD
752652	-0.0467608	9.62e-14	0.999973	-0.155832	BMD
752660	-0.110808	2.15e-12	0.992681	0.106087	BMD
753954	-0.143369	0.040694	0.966178	-0.244304	BMD
75790	0.212961	7.46e-10	0.978353	0.234477	BMD
76042	-0.0727195	1.06e-39	0.999643	-0.0611403	BMD
765920	-0.556884	0.320059	0.999931	-76.6771	BMD
767686	-0.195203	0.284	1	89.6853	BMD
768602	0.268391	1.47e-21	0.998701	0.130018	BMD
768620	-0.231281	8.49e-10	0.962067	0.289788	BMD
768768	0.0522604	8.33e-42	1	-0.0216584	BMD
782324	0.0989643	0.00569102	0.976691	0.302869	BMD
786452	-0.188597	0.647012	0.994972	33.5146	BMD
787936	-0.0508131	1.43e-11	0.999984	-0.0256744	BMD
79284	0.00701711	0.0391925	0.999966	0.0223601	BMD
79436	0.0469379	1.01e-78	1	0.120658	BMD
79450	-0.0225275	1.28e-23	1	-0.0706285	BMD
79468	0.00126509	0.177043	0.99964	0.00701706	BMD
79536	0.0361501	9.32e-22	0.9996	0.107028	BMD
93172	-0.31498	5.12e-34	1	-0.369038	BMD
93200	-0.0208771	0.117439	0.999995	-0.144044	BMD
93230	0.0135606	1.17e-29	1	0.0578191	BMD
112058	0.0647064	3.37e-15	1	0.0546726	BMD
112060	-0.0266522	2.5e-15	1	-0.0237385	BMD
112108	0.010946	3.57e-15	0.998147	0.0092138	BMD
113698	-0.00400176	0.194412	0.999328	-0.0240517	BMD
120926	0.0242125	0.0309902	0.999486	0.0539815	BMD
824886	-0.304161	0.0967086	0.982987	-43.8438	BMD
827836	-0.0374077	3.33e-13	0.999728	-0.218518	BMD
134582	0.0262229	4.62e-06	0.978706	0.0273002	BMD
139868	-0.00252264	3.34e-11	0.972038	-0.00200753	BMD
161878	0.0344458	0.000172911	0.986169	0.0569779	BMD
836344	0.0309316	9.63e-10	0.999828	0.0693438	BMD
860090	-0.560417	2.22e-13	0.974717	-0.480224	BMD
863510	0.359144	1.27e-08	0.964429	0.332611	BMD
874170	-0.123003	0.970674	0.999005	146.385	BMD
877392	0.231334	0.171431	0.999999	-85.3793	BMD
173436	-0.024613	3.09e-11	0.999948	-0.0312522	BMD
173492	0.00921345	2.78e-24	1	0.0189858	BMD
173640	-0.0147463	0.421173	0.959393	0.0388507	BMD
181420	0.00330618	8.37e-10	0.988868	0.00287462	BMD
188776	0.0236539	1.02e-06	0.959625	0.0227118	BMD
196540	-0.00217479	0.212501	0.951223	-0.0482757	BMD
219052	0.211128	4.66e-15	0.99986	0.189016	BMD
219674	0.0456808	1.66e-05	0.950133	0.0552261	BMD
220544	0.12552	1.18e-12	0.998457	0.186664	BMD
228526	-0.00740801	2.76e-12	0.996482	-0.0097043	BMD
244510	0.00730216	5.46e-09	0.963176	0.0136414	BMD
250566	-0.0205721	3.13e-07	0.957419	-0.0781319	BMD
906324	0.0521762	0.56749	0.999935	-54.3079	BMD
910954	0.226785	0.315064	1	94.8674	BMD
914846	0.0222451	0.000337092	0.95805	0.0799516	BMD
918920	-0.0522728	0.277542	0.99565	19.8568	BMD
255440	-0.0702713	1.23e-07	0.997058	-0.270921	BMD
259958	-0.0210044	1.09e-13	0.984768	-0.0344709	BMD
264640	0.0223616	0.0237143	0.954004	0.119838	BMD
264744	0.0211144	0.20401	0.98069	-0.1459	BMD
283020	-0.213187	7.92e-103	1	-0.204422	BMD
283734	-0.027119	2.39e-06	0.955184	-0.0360838	BMD
284888	-0.0154609	1.06e-15	0.998117	-0.0498157	BMD
285740	0.0791594	6.51e-05	0.996982	0.277826	BMD
290530	-0.0383401	1.34e-14	0.981761	-0.0684375	BMD
290544	0.00189325	0.58716	1	0.0843645	BMD
290556	-0.0245029	3.44e-06	1	-0.171468	BMD
290574	-0.166511	1.82e-51	0.969568	-0.0805573	BMD
290580	0.0424323	1.02e-49	0.98247	0.0644348	BMD
290594	-0.0087591	1.35e-32	1	-0.00614343	BMD
290602	-0.00875325	2.9e-79	1	-0.107278	BMD
291376	-0.00377418	2.85e-06	0.981328	-0.00569316	BMD
931366	0.277114	8.77e-05	0.972276	-0.573264	BMD
932864	0.033909	8.28e-19	0.996935	0.0504639	BMD
932964	0.0189122	0.000965375	0.999999	0.153498	BMD
937768	47.5568	0.000305157	0.97927	55.781	BMD
956200	-0.153293	1.99e-29	0.997011	-0.120597	BMD
956254	0.655943	1.04e-35	0.999861	0.492196	BMD
957422	-0.0291854	0.0349067	0.979183	-0.366179	BMD
958880	0.0520569	1.35e-15	0.999509	0.0400521	BMD
958884	0.00900519	0.887613	0.999979	0.366304	BMD
958890	0.0223752	4.49e-10	0.999782	0.0144316	BMD
958904	-0.383067	0.459109	1	-1.19468	BMD
958940	0.101964	0.000440791	0.953901	0.0738931	BMD
297140	-0.0120718	0.00141569	0.984826	-0.0252809	BMD
300054	-0.0835312	0.525446	0.990656	-0.185459	BMD
303032	0.0188952	1.27e-06	0.995591	-0.0411176	BMD
303248	0.0136196	4.83e-16	0.989568	0.0579214	BMD
303260	0.0187362	4.04e-16	0.991669	0.0212491	BMD
303502	0.00484663	3.05e-09	0.999595	0.00639347	BMD
304340	-0.0586234	1.56e-18	0.999998	-0.0906	BMD
306264	-0.0182244	9.4e-13	1	-0.0157599	BMD
306304	-0.00537312	4.32e-12	0.961916	-0.00331771	BMD
307542	0.00557882	7.46e-11	0.997328	0.00424967	BMD
323522	0.304212	0.0830043	0.968116	0.675942	BMD
323688	-0.51395	1.85e-13	0.99138	0.493934	BMD
323772	-0.333964	0	0.997837	-0.320689	BMD
323792	0.708458	1.76e-279	1	0.632734	BMD
323794	-0.299191	4.34e-127	0.965016	-0.0590603	BMD
967196	0.353532	3.48e-10	0.999913	0.309309	BMD
969094	0.192695	1.64e-76	1	0.152717	BMD
969098	0.274685	2.56e-38	0.982734	0.71129	BMD
971482	0.15369	0.140062	0.998862	0.331814	BMD
973668	-4.72401	0.00511143	0.999803	49.265	BMD
977344	-0.367667	0.620505	0.999331	72.3136	BMD
984374	0.0239412	1.42e-32	0.999999	0.126904	BMD
988998	0.123414	0.0126661	0.983033	0.147242	BMD
989028	0.129396	0.0660836	0.982224	-0.696984	BMD
989910	0.222488	7.02e-22	1	0.472135	BMD
989914	0.433751	1.58e-12	1	0.574311	BMD
993930	1.22453	0.476215	0.999999	83.8313	BMD
334524	0.0456538	1.42e-06	0.995169	0.0372577	BMD
335420	-0.00520333	1.41e-10	0.962783	-0.0228932	BMD
357916	-0.0462766	6.42e-19	0.992484	-0.11088	BMD
361378	0.0639206	2.61e-07	0.97244	0.121289	BMD
1003316	0.36217	5.95e-05	0.965139	0.571313	BMD
1014230	0.155532	0.000922044	0.955957	-0.303114	BMD
1014480	-0.0673077	0.0304164	0.952924	-0.564984	BMD
1020128	0.264313	0.746933	0.999787	74.5832	BMD
1024968	0.0345429	0.394436	0.999892	-54.2866	BMD
1026318	-0.15769	0.0116795	0.997994	-0.346107	BMD
382720	0.0132791	2.08e-11	0.993431	0.0194656	BMD
386818	0.684064	9.28e-10	0.996175	0.624988	BMD
386840	-0.00823701	5.08e-06	0.981488	-0.00612452	BMD
388910	-0.123679	0.0293122	0.956358	-0.208694	BMD
394622	0.00161012	9.46e-07	0.998585	0.00363179	BMD
1042228	-0.0100927	0.685128	0.996182	0.887848	BMD
1059180	-0.0247288	2.47e-13	0.99911	-0.0498692	BMD
1064814	0.0107324	1.73e-10	0.983505	0.0510565	BMD
397602	4.63688	2.04e-08	0.982587	3.90142	platelet
401066	-2.49021	1.4e-12	0.988859	-2.42248	platelet
401746	9.95517	1.83e-09	0.990861	8.47701	platelet
403912	167.812	2.06e-14	0.999991	147.734	platelet
409048	15.8302	3.94e-27	0.999781	15.3925	platelet
411832	-2.48975	7.77e-10	0.986599	-2.48112	platelet
411928	36.981	2.03e-127	0.999544	15.2865	platelet
411982	-206.19	1.03e-70	0.984725	-61.89	platelet
416818	-2.81249	3.46e-12	0.999959	-2.8763	platelet
419222	21.0671	3.75e-06	0.978448	20.4064	platelet
427318	-31.839	2.7e-06	0.969816	-29.0309	platelet
1069314	11018.6	1.51e-05	0.981949	11186.1	platelet
1079056	-75.8568	3.68e-165	1	-46.0978	platelet
431526	-3.4075	1.8e-68	1	-5.64337	platelet
431528	-13.5319	3.52e-08	1	-29.2159	platelet
431534	2.11885	5.86e-19	0.999936	-3.49183	platelet
431540	-14.5339	4.75e-70	0.957473	-7.80955	platelet
431554	-1.79436	0.0965208	1	-39.9238	platelet
433286	1.61883	2.04e-06	0.972428	1.50437	platelet
434816	4.29202	4.96e-09	0.991839	15.2814	platelet
443326	-13.4674	1.81e-17	0.999828	-15.0099	platelet
445186	-5.28442	2.59e-31	0.999999	-21.7911	platelet
448102	-4.1749	1.55e-05	0.952313	-9.36039	platelet
448598	9.89281	2.7e-05	0.968688	8.04711	platelet
454960	-1.10844	0.00277341	0.999442	-2.95473	platelet
459120	-0.06805	0.767673	0.962875	4.3443	platelet
459182	3.72374	0.0420263	1	4.68676	platelet
459244	-0.494622	0.0680103	0.983202	0.989897	platelet
459908	10.7688	1.04e-06	0.960968	23.2103	platelet
459950	45.9961	3.15e-09	0.995111	157.8	platelet
459998	-4.83911	2.17e-11	0.994309	-20.4106	platelet
460030	2.76655	4.57e-14	0.999468	3.34096	platelet
460978	3.48145	0.0573297	0.999921	23.1333	platelet
461016	7.80926	8.92e-09	0.997685	10.4834	platelet
461034	-4.20123	0.00131032	0.997994	12.1937	platelet
461064	1.13895	2.62e-14	0.995651	1.09258	platelet
461066	3.11601	0.0144682	1	-12.3136	platelet
461472	-16.0913	1.79e-16	0.983145	-26.4977	platelet
463166	-0.969044	0.622879	0.982492	12.3913	platelet
463444	-0.857991	9.14e-24	1	-0.887101	platelet
463912	3.20949	1.6e-22	0.99871	4.94102	platelet
464014	-0.875444	0.0238704	0.999993	-6.16909	platelet
464020	6.48671	3.75e-10	0.999962	12.8659	platelet
464214	1.69552	0.0196207	0.967942	-4.20414	platelet
1091878	1.01496	3.05e-54	0.999956	2.82943	platelet
1111316	48.1841	0.627471	0.984962	-9034.09	platelet
466042	0.303272	3.69e-06	0.998144	1.0838	platelet
466052	0.395347	9.98e-25	1	1.77089	platelet
466792	9.58332	5.95e-07	0.95302	8.16761	platelet
467494	-3.76047	2.66e-08	0.998199	-11.6063	platelet
468030	43.4945	8.3e-11	0.999426	64.5059	platelet
468080	-31.4143	2.25e-46	0.984682	-17.4529	platelet
468108	8.66502	3.24e-92	0.999992	18.7481	platelet
468178	2.52495	6.8e-08	0.997836	5.96248	platelet
468206	-12.9984	1.02e-09	1	-8.24289	platelet
469490	1.2002	0.117485	0.956996	7.66089	platelet
470182	-1.69508	5.35e-09	0.97347	-6.74293	platelet
472220	-50.9616	5.67e-06	0.953035	-93.743	platelet
472570	1.51684	0.910284	0.970124	-61.6765	platelet
474508	-5.96479	8.71e-05	0.999805	-17.4093	platelet
476082	-4.59302	1.46e-08	0.970921	-9.5256	platelet
477808	6.96614	6.32e-09	0.984601	12.9847	platelet
477830	-7.99053	1.95e-22	1	-5.17957	platelet
477834	-2.41536	0.00013754	0.999623	-3.91508	platelet
477940	8.53117	2.56e-10	0.999211	20.5042	platelet
478308	-8.46366	2.71e-10	0.999999	-12.7189	platelet
479090	-30.6052	2.37e-20	0.999931	-33.2367	platelet
480276	-42.2439	6.54e-49	0.999164	-91.7249	platelet
480948	10.6463	4.28e-36	0.991452	18.7404	platelet
480982	3.02114	7.55e-38	0.999597	2.89638	platelet
481106	3.79	0.0443615	0.993584	8.20965	platelet
482040	-8.66868	5.18e-09	0.983559	-8.48961	platelet
482678	32.4136	1.82e-23	0.979109	28.332	platelet
482696	-5.56691	3.67e-35	0.985301	-3.77455	platelet
482720	0.890474	0.464863	0.999288	-36.9604	platelet
482954	-18.5375	8.04e-06	0.98664	-28.3265	platelet
486382	-74.9328	9.63e-05	0.959429	-133.507	platelet
488964	4.31291	1.48e-13	0.998494	4.4893	platelet
489898	-4.6952	7.12e-07	0.95021	-9.8078	platelet
493646	-13.5829	2.49e-34	1	-38.1701	platelet
494582	-79.6728	0.0236885	0.992759	-79.9724	platelet
494628	55.3832	5.7e-29	0.998303	147.824	platelet
494630	-6.54239	9.46e-06	0.99911	-15.1216	platelet
494664	-36.2137	0.000347042	1	-377.731	platelet
494716	-121.874	1.13e-10	1	-229.108	platelet
494744	-0.600068	0.160184	1	-26.7696	platelet
494950	-9.66476	1.02e-45	1	-6.65839	platelet
495020	-24.5891	1.43e-14	1	-29.3537	platelet
495128	-18.6391	1.73e-05	1	-4.47083	platelet
497994	2.94476	2.29e-57	0.999968	-5.02037	platelet
498036	31.0684	1.97e-05	0.999915	95.6965	platelet
498042	-9.6671	1.84e-05	0.998587	-62.6365	platelet
498074	33.0498	3.95e-47	1	83.1813	platelet
498086	-23.3383	7.48e-64	0.999784	-38.8973	platelet
498178	-3.66499	7.04e-08	0.99972	-3.33428	platelet
498454	-30.4787	1.23e-05	0.969786	-70.8176	platelet
498618	8.20286	4.96e-17	0.952318	12.6915	platelet
1124944	46.6789	3.64e-32	0.997508	68.6547	platelet
1130430	145.557	1.16e-13	0.9997	294.179	platelet
1130720	35.2154	3.77e-27	0.999999	21.9625	platelet
1141030	11.5182	2.5e-06	0.969988	55.3369	platelet
1142368	10.0374	5.51e-35	0.95215	17.0741	platelet
1142672	-0.67025	0.926276	0.983446	-53.5869	platelet
1143032	-9.90348	9.23e-05	0.999152	-57.5761	platelet
1143890	28.7222	3.01e-15	0.999977	29.5094	platelet
504886	-0.663191	0.555682	0.969609	33.1422	platelet
510234	17.4639	1.02e-07	0.974975	-19.2422	platelet
511742	-2.86633	0.0182538	0.957077	-4.06335	platelet
513144	6.4627	0.000427766	0.979843	-27.5542	platelet
516362	2.91871	1.69e-20	0.999971	2.00924	platelet
516364	1.89893	0.151898	0.998792	6.2307	platelet
516372	3.31051	0.000694807	1	8.54417	platelet
519606	7.72406	4.39e-23	1	6.92397	platelet
519612	-6.95593	0.400727	0.987422	62.8998	platelet
519740	1.74112	1.29e-09	0.999983	1.4756	platelet
520764	-3.6698	2.34e-28	1	-14.3802	platelet
1156926	8.10715	0.452458	0.999681	333.868	platelet
1158138	-17.8076	0.0366194	0.999031	184.846	platelet
1161932	-12.7175	0.0477372	0.955826	-207.325	platelet
1162318	-67.7187	0.0948503	0.996356	6845.54	platelet
1164918	7.24717	0.00401888	0.984047	11.8996	platelet
1168738	141.346	2.48e-07	0.971306	203.919	platelet
522230	19.7781	0.0104997	0.981563	-36.367	platelet
527112	-10.3879	3.2e-15	0.969379	-54.703	platelet
531134	-1.82837	0.109808	0.989144	-9.7074	platelet
532630	29.3729	1.82e-17	0.999992	27.5869	platelet
536614	6.83636	9.46e-05	0.999702	9.46272	platelet
539028	0.840323	6.59e-06	0.985033	1.99351	platelet
541554	1.14811	4.51e-51	1	1.05061	platelet
542198	-10.2464	9.4e-09	0.976057	-10.938	platelet
542214	4.77594	0.0327737	0.965324	-11.6512	platelet
542254	-38.5867	4.78e-32	1	-29.3856	platelet
542306	-10.9436	8.75e-29	0.994108	-33.3507	platelet
542310	16.1868	1.68e-25	0.999607	7.0515	platelet
542498	-9.75068	4.09e-31	1	-12.6239	platelet
1180818	144.594	5.16e-35	0.971141	502.428	platelet
1180864	-38.049	1.65e-07	0.999998	-56.399	platelet
553220	3.93296	0.000189491	0.984359	31.2805	platelet
555292	-24.8693	4.46e-31	0.999971	-19.9867	platelet
555294	-3.49793	7.21e-08	1	-8.34139	platelet
555430	-12.1496	0.101603	0.994591	-44.887	platelet
556090	-6.42051	1.4e-16	0.999999	-18.5259	platelet
560052	-17.8474	2.19e-10	0.985999	-17.7018	platelet
564188	-6.98401	0.318142	0.959014	-16.9374	platelet
564918	123	3.38e-05	0.985616	135.577	platelet
566632	4.46054	7.28e-09	0.999826	4.29716	platelet
1192524	-24.2358	1.16e-37	1	-138.253	platelet
569974	-1.21178	2.27e-05	0.976645	-19.8852	platelet
570584	-7.26316	6.01e-06	0.959233	-13.3517	platelet
571330	8.08148	0.0224536	0.996841	15.0317	platelet
575852	-16.2267	6.45e-08	0.99977	-43.7247	platelet
575854	-4.33109	0.190261	0.997802	35.9048	platelet
578656	8.23057	7.13e-11	0.990121	6.6055	platelet
582874	8.39868	4.44e-07	0.987781	11.276	platelet
586306	-3.47012	5.23e-08	0.998176	-9.90569	platelet
587488	-10.498	3.6e-19	1	-9.9575	platelet
587930	5.71669	0.00343709	0.954738	-5.03224	platelet
588738	8.43346	4.12e-24	0.999984	4.08214	platelet
588752	-0.0852966	0.578967	0.999993	-0.973885	platelet
1206384	-160.779	0.351999	0.999859	23783.7	platelet
1207144	-143.525	0.00869229	0.999985	-6186.38	platelet
1221274	-174.934	0.258059	0.996565	-108.5	platelet
590368	2.74275	1.92e-30	0.999888	16.6485	platelet
591016	-5.88231	7.33e-07	0.994845	-14.207	platelet
591504	-0.123545	0.920711	0.999783	4.90555	platelet
592474	-3.7099	2.97e-10	0.976188	-5.04359	platelet
596508	-54.5456	0.0104921	0.967355	74.6566	platelet
597368	-7.01349	4.52e-05	0.951539	42.6397	platelet
597492	-18.0656	1.79e-106	0.995702	44.0352	platelet
598194	-6.81849	6.31e-19	0.976295	-8.00163	platelet
599394	5.31683	2.72e-14	0.999989	15.81	platelet
599398	-9.6364	7.9e-36	0.999942	-17.8569	platelet
599446	7.28872	2.75e-36	1	17.1242	platelet
599538	-1.87343	0.00028913	0.965556	-1.28654	platelet
600932	5.1208	2.92e-05	0.952674	28.1348	platelet
602726	34.6249	6.97e-08	0.99944	66.7438	platelet
602770	-10.8097	3.95e-28	0.999237	-10.1328	platelet
604224	-6.71911	2.17e-08	0.978829	-20.559	platelet
609248	0.418305	0.671486	1	55.7803	platelet
1222252	-4.07498	7.08e-05	0.98367	-8.08727	platelet
1227350	-67.8288	6.9e-06	0.957878	-66.5862	platelet
1228212	-30.9996	3.93e-06	0.98462	-34.8361	platelet
1229208	57.5249	1.02e-09	0.999301	57.5003	platelet
616150	-1.87584	3.97e-06	0.968007	-11.977	platelet
620668	-104.033	1.17e-24	1	22.4847	platelet
620670	1.80746	1.19e-18	1	4.78286	platelet
620698	-2.30206	3.06e-37	0.98331	-2.66731	platelet
620868	-4.06342	0.00219093	0.979451	-30.8925	platelet
624858	-12.337	0.0169297	0.960668	-57.1996	platelet
625438	-13.2375	2.39e-05	0.965288	45.3911	platelet
627714	20.1027	0.00252043	0.995437	-23.2191	platelet
629002	2.76217	1.31e-07	0.985831	2.51022	platelet
630656	-2.91605	0.054678	0.967505	-20.3402	platelet
630786	-6.95023	0.0616228	0.957097	9.02367	platelet
631652	-3.3367	1.29e-10	0.997285	-8.30038	platelet
1247472			0.997591	-10274.3	platelet
1253086	-2.12634	3.02e-08	0.996649	-6.25538	platelet
1254066	0.499524	0.858	0.982878	3.82797	platelet
633270	-9.96137	1.64e-07	0.989459	21.9901	platelet
636994	2.59933	3.24e-09	0.973064	2.63933	platelet
637038	-7.72461	3.6e-05	0.997206	-28.9443	platelet
638068	4.07975	7.78e-09	0.999394	24.4924	platelet
638866	5.06694	0.338162	0.990733	55.8125	platelet
639034	1.8128	2.15e-31	1	1.56779	platelet
639040	-27.2713	0.000325189	1	-23.293	platelet
639042	12.7241	2.57e-14	0.999999	77.4637	platelet
639046	1.1857	0.66685	1	-23.4082	platelet
639462	1.47776	6.95e-09	0.999989	3.27114	platelet
640616	-15.4153	6.57e-24	0.999411	-13.3217	platelet
643628	28.4992	2.02e-08	0.961823	38.7452	platelet
645824	1.41577	5.96e-06	0.99501	3.78726	platelet
646950	6.95117	2.04e-10	0.996989	5.95787	platelet
647228	-4.0932	8.29e-35	1	-8.9153	platelet
647248	-4.65843	1.09e-35	0.999237	-26.5516	platelet
647500	-14.2861	0.00377722	0.986608	-15.9604	platelet
648516	2.23157	8.69e-08	0.967694	2.7747	platelet
650882	1.25613	0.13696	1	10.7845	platelet
651222	-9.71865	5.72e-06	0.999406	-20.116	platelet
651252	-0.833139	0.00124875	0.990136	-4.33115	platelet
1259584	-16.3409	3.44e-05	0.982241	89.7142	platelet
1261306	-17.4867	0.342825	0.997039	94.3239	platelet
23322	-9.55983	1.39e-08	0.9862	-8.51983	platelet
2380	0.993788	6.21e-15	0.999953	0.896578	platelet
28450	-29.8129	4.97e-08	0.989654	-25.8757	platelet
32002	-14.997	3.55e-09	0.993591	-12.2259	platelet
32514	-30.1145	4.17e-07	0.956651	-25.8322	platelet
32518	-0.965423	3.96e-13	0.99996	-0.856838	platelet
34730	-2.46214	7.51e-35	1	-2.38707	platelet
38680	76.7947	1.3e-12	0.964188	65.4834	platelet
38830	8.13701	2.15e-10	0.982261	7.24835	platelet
38896	-20.8839	1.67e-09	0.99911	-19.1441	platelet
38906	-13.1037	1.81e-12	0.952519	-10.1449	platelet
40274	7.57538	5.76e-08	0.98405	7.14654	platelet
4232	-44.5287	7.44e-36	0.999999	-31.6877	platelet
43214	-16.8247	2.71e-10	0.959876	-15.872	platelet
43246	0.0339201	0.824875	1	-1.62235	platelet
43264	131.615	2.06e-68	1	92.0411	platelet
45028	-36.8533	2.73e-08	0.985482	-30.9739	platelet
45842	6.4186	2.1e-08	0.999629	6.47717	platelet
47348	-2.24118	1.93e-10	0.965477	-1.77626	platelet
49486	12.9561	4.91e-19	0.967267	11.1148	platelet
51570	17.5663	2.91e-13	0.98664	13.5801	platelet
51738	-13.9547	1.75e-14	0.957196	-10.3373	platelet
51834	-3.22282	8.77e-37	0.98999	-1.74541	platelet
51880	8.33921	5.66e-81	1	6.92503	platelet
57548	8.01541	1.11e-07	0.986998	7.68353	platelet
57796	-2.33817	7.64e-14	0.979671	-2.05652	platelet
60598	7.41899	2.36e-05	0.969396	7.84871	platelet
64106	4.10681	2.11e-16	1	3.78615	platelet
64112	154.937	4.44e-21	0.994924	86.6427	platelet
64134	248.809	1.11e-118	1	242.73	platelet
64166	-24.2112	8.1e-29	0.964756	-11.118	platelet
64174	-47.6511	1.68e-29	1	-34.9147	platelet
64176	-38.5106	9.85e-17	0.999488	-27.7873	platelet
644	5.72942	1.22e-08	0.998113	5.11927	platelet
693590	20061.3	5.17e-09	0.999455	18214.6	platelet
694278	-30.1837	1.39e-15	0.998305	-21.8582	platelet
694310	82.9814	2.23e-16	1	106.316	platelet
702812	-82.8896	3.47e-06	0.991208	-87.077	platelet
704968	-79.0611	2.99e-12	0.999984	-76.3642	platelet
723010	13936.7	3.05e-06	0.990113	13984.7	platelet
728558	175.613	4.83e-52	1	151.185	platelet
731632	1613.36	2.98e-05	0.952343	1520.57	platelet
736484	-45.2766	1.59e-12	0.999956	-42.0633	platelet
9082	-164.667	4.88e-13	0.999994	-230.196	platelet
9152	6.98912	2.63e-16	0.995536	7.7156	platelet
10176	6.09813	2.2e-17	0.951416	5.33386	platelet
13174	16.8738	9.78e-08	0.999069	16.5154	platelet
14284	12.3447	5.14e-15	0.99891	11.3069	platelet
15576	73.2451	1.26e-09	0.988348	72.8716	platelet
19920	-59.8439	1.5e-08	0.999888	-60.9797	platelet
658332	6.0911	0.478056	0.978533	169.757	platelet
659430	28.1204	1.83e-42	1	16.9775	platelet
659442	27.5402	5.23e-16	0.99988	117.337	platelet
662686	-25.8589	6.36e-08	0.975519	-25.3323	platelet
664734	4.71793	0.000990148	0.999558	2.4499	platelet
668596	43.8078	1.2e-09	0.999963	86.983	platelet
668598	13.0517	1.06e-43	1	30.5724	platelet
1273084	-15.1037	4.25e-11	0.999999	-59.159	platelet
670710	21.5139	2.12e-09	0.997914	17.168	platelet
674692	-49.7687	6.96e-20	0.995901	-29.2588	platelet
674698	4.12004	3.67e-13	0.997801	3.00314	platelet
677108	-1.91111	6.19e-09	0.992011	-1.93321	platelet
68618	-0.973516	0.494157	0.99889	-40.5774	platelet
71860	53.6035	6.81e-10	0.999865	380.94	platelet
73090	0.715198	2.77e-12	1	3.36941	platelet
73096	-63.7624	1.06e-97	1	-58.9266	platelet
73102	1.88302	9e-24	0.965385	3.70658	platelet
74498	14.8382	0.00124625	0.987795	-31.4352	platelet
74606	-73.5083	6.36e-06	0.995771	-40.0164	platelet
74802	13.8798	0.134433	0.996144	20.4845	platelet
76578	-24.572	1.77e-05	0.999995	137.837	platelet
766586	26.123	5.75e-16	1	45.9416	platelet
77448	-1.058	4.55e-15	0.997694	-5.11899	platelet
785552	2.35081	4.75e-05	0.956678	4.52392	platelet
789330	5.00957	4.15e-24	0.999873	8.55255	platelet
792422	293.97	1.07e-13	1	-303.837	platelet
82602	-245.515	1.02e-20	0.972176	-216.481	platelet
83218	4.38528	3.93e-07	0.966475	19.0336	platelet
83724	67.7298	6.31e-10	0.999445	-171.06	platelet
86708	2.80131	5.62e-08	0.990939	2.30451	platelet
91694	-7.03607	6.18e-08	0.967513	-3.9465	platelet
92506	-10.1883	8.34e-07	0.970064	-1.12805	platelet
101366	3.92226	5.69e-09	0.963244	15.8546	platelet
101484	10.0132	1.96e-12	0.999498	57.7362	platelet
101500	4.91513	2.1e-08	0.998853	4.86687	platelet
101642	-11.8226	2.62e-11	0.999861	-14.7884	platelet
113620	-0.720874	0.732298	0.971134	-19.5447	platelet
116566	3.52665	5.76e-22	0.994331	6.72982	platelet
118406	-6.16252	0.00659627	0.998853	59.2294	platelet
118462	-0.982858	3.67e-11	0.999934	-1.03012	platelet
123746	3.73988	6.49e-13	0.999968	15.9844	platelet
123786	2.9886	1.67e-07	1	15.9079	platelet
797030	4.87492	6e-23	0.967067	30.4247	platelet
797632	-73.8915	3.41e-22	1	385.145	platelet
804650	-30.555	9.35e-36	1	-28.0164	platelet
130596	2.00465	1.53e-08	0.992581	2.58595	platelet
134142	5.51151	7.02e-09	0.999955	3.92594	platelet
137104	11.5493	0.0567844	0.99351	52.6159	platelet
140026	1.5573	0.0432727	0.999998	-4.29415	platelet
140036	-55.221	5.71e-13	0.999687	-159.381	platelet
140048	-16.0729	2.05e-122	1	-54.1695	platelet
140052	1.43618	4.34e-10	0.981948	3.44803	platelet
140078	48.6288	9.42e-84	1	166.95	platelet
140086	3.43889	2.97e-07	0.963911	3.56087	platelet
140092	8.95804	4.6e-24	0.998299	10.3326	platelet
140158	7.9215	3.32e-13	0.991574	6.18802	platelet
144178	33.7108	7e-08	1	30.2124	platelet
152574	4.93789	2.4e-05	0.984186	5.69749	platelet
153132	-4.36878	2.99e-24	1	13.3731	platelet
153592	16.0568	1.95e-07	0.988233	34.4595	platelet
153770	-0.298108	0.0122202	0.98656	-0.334879	platelet
153774	33.2539	1.68e-05	0.999972	41.6098	platelet
162620	1.6506	0.0360825	0.997812	1.28717	platelet
164436	158.466	6.81e-07	0.999678	161.261	platelet
165684	-36.6604	1.93e-06	0.999503	-31.4116	platelet
166970	-53.6649	7.4e-16	0.986682	-88.7281	platelet
168440	15.1221	9.05e-09	0.999998	36.0984	platelet
168456	2.56274	0.010759	0.999902	9.98541	platelet
168466	-27.7345	9.55e-18	0.999994	6.49586	platelet
168470	-26.7376	6.16e-27	1	-51.9037	platelet
168472	11.8763	3.74e-08	0.999964	-6.4299	platelet
168474	9.99592	0.054906	0.992811	15.6029	platelet
168484	1.0951	0.0526105	0.987559	3.96116	platelet
169508	-0.168388	0.890421	0.989251	12.1752	platelet
849572	7.95534	1.35e-05	0.978846	7.68884	platelet
872580	-26.0599	2.1e-06	0.988493	149.473	platelet
873674	-69.1356	2.89e-05	0.992567	214.434	platelet
874254	10.8214	5.17e-07	0.97272	24.7148	platelet
174190	-6.15314	6.38e-08	0.967073	-19.1827	platelet
174496	-11.1425	5.79e-12	0.994046	-24.758	platelet
175542	25.536	9.71e-23	1	133.441	platelet
175582	0.210296	0.360695	0.99637	-4.57112	platelet
175586	-4.22302	7.42e-06	0.99999	-14.3724	platelet
178810	7.98198	3.11e-07	0.984098	9.62033	platelet
184752	-5.28543	1.78e-07	0.960657	-4.61776	platelet
185448	-4.1232	4.64e-20	0.999733	-3.35986	platelet
194934	-4.85832	2.55e-13	0.998804	-10.0507	platelet
194988	0.730257	0.919156	0.983884	-74.266	platelet
198836	-1.41889	1.94e-11	0.998951	-2.25288	platelet
211956	1.61121	2.37e-09	0.999746	3.6681	platelet
212034	-17.4384	3.71e-30	1	17.8632	platelet
212038	8.25587	8.11e-25	0.999622	21.2873	platelet
217498	-4.53109	4.09e-06	0.98854	-2.74649	platelet
224376	-2.19257	6.11e-06	0.99909	-2.73382	platelet
226724	-7.46222	9.51e-17	0.99958	-5.28172	platelet
227064	-7.80553	1.38e-37	0.976283	-7.01464	platelet
227138	-12.723	1.71e-30	0.999994	-17.227	platelet
227164	7.75968	7.13e-74	1	2.86273	platelet
227448	4.24788	0.014593	0.983343	-11.6553	platelet
229940	-57.5581	1.52e-41	0.999998	-36.9924	platelet
229966	-156.525	3.26e-58	0.994325	-74.8217	platelet
229968	-30.6443	3.71e-06	0.999978	-212.483	platelet
230000	0.0712705	0.949286	0.994647	7.72939	platelet
230006	0.692663	4.24e-23	0.999822	0.400359	platelet
230022	-37.153	0.000750474	0.998532	75.8916	platelet
231830	1.21655	9.86e-06	0.996413	7.20454	platelet
234208	24.7933	9.23e-19	1	23.8988	platelet
239706	-7.08915	2.86e-16	0.987409	-10.5171	platelet
245910	-0.605312	0.17325	0.970866	1.83347	platelet
247340	0.923753	2.42e-05	0.970211	2.78117	platelet
247650	1.11391	2.17e-29	1	2.03958	platelet
252490	7.91599	1.24e-08	0.998766	17.3868	platelet
893420	37.4517	0.000518343	0.96991	108.084	platelet
903160	-17.1048	0.30273	0.99712	-101.231	platelet
922114	71.8484	7.1e-10	0.982698	20.9474	platelet
925004	21.197	0.786743	0.990796	-513.603	platelet
260798	2.20649	0.000454643	0.999875	4.13167	platelet
260874	-25.2705	2.73e-61	1	-21.472	platelet
260890	59.2896	3.97e-22	0.998924	52.3779	platelet
260930	-39.4827	3.58e-54	0.99869	-19.4473	platelet
260942	-2.57857	0.0376323	0.998821	-15.6077	platelet
261184	1.68402	1.22e-10	0.999966	1.73011	platelet
262018	-1.42769	5.49e-15	0.999995	-1.90468	platelet
262034	-5.76125	7.66e-11	0.965545	-7.20069	platelet
262126	0.326294	0.127264	0.989496	-2.82637	platelet
262208	-1.49833	0.0436022	0.98256	10.7895	platelet
262512	0.436539	3.2e-05	0.993051	1.52615	platelet
262528	-11.6157	4.91e-11	0.998605	-7.40512	platelet
262660	6.34591	0.000565513	0.999999	-16.3094	platelet
262784	34.6295	7.91e-07	0.998823	48.2517	platelet
262792	45.3338	6.52e-32	0.998946	24.07	platelet
262880	16.0838	6.25e-19	0.999997	17.9915	platelet
263268	-1.1817	1.46e-125	0.999982	-0.622791	platelet
263274	60.0709	8.97e-200	1	31.6161	platelet
263280	0.215134	0.593496	0.999999	-4.35566	platelet
263316	-16.4704	5.26e-57	0.981983	12.5506	platelet
263964	68.5335	8.71e-07	0.999975	97.4907	platelet
264148	18.0614	2.52e-08	0.95385	44.9465	platelet
266986	8.06258	1.39e-05	0.979233	19.1693	platelet
267148	-2.7867	4.22e-08	0.989516	14.0111	platelet
285358	19.9525	0.0468534	0.980055	19.6405	platelet
285502	-45.2954	3.63e-158	1	-181.319	platelet
293298	-3.93909	0.431946	0.997776	46.4581	platelet
294172	-4.63728	4.22e-07	0.989281	-18.3683	platelet
930046	3.15376	9.16e-07	0.992084	9.74223	platelet
931026	-11.9462	0.000222519	0.975865	-14.2325	platelet
931356	-23.6773	3.25e-11	0.998739	-28.6943	platelet
931516	-1.11756	2.93e-35	0.999221	-1.748	platelet
931560	1.98995	0.853734	0.969842	56.8063	platelet
931592	-11.3712	2.09e-23	0.9837	-5.40839	platelet
931614	-9.3939	1.05e-37	0.999999	-5.85265	platelet
931622	-11.0624	1.14e-13	0.999999	-8.52913	platelet
931632	281.821	6.56e-25	1	286.426	platelet
931674	-8.53307	0.0198365	0.955995	48.4063	platelet
931788	2.44447	1.63e-20	1	4.20639	platelet
931800	6.2019	9.56e-16	0.963747	7.86825	platelet
931876	-53.2012	1.65e-07	0.99995	-233.337	platelet
933196	61.5836	4.09e-11	0.973678	85.9721	platelet
933218	-5.36026	2.08e-24	0.998192	-17.5605	platelet
934750	2.10209	0.703155	0.965257	37.7017	platelet
951280	-2.05824	2.84e-21	0.999575	-3.67718	platelet
952706	-0.0240386	0.980522	0.981081	10.7075	platelet
954562			0.962689	18247.4	platelet
960938	-25.5304	1.49e-17	0.999873	-7.61283	platelet
305574	3.59403	7.25e-15	0.989627	10.9558	platelet
306106	1.50171	0.000116508	0.998224	-13.9308	platelet
306148	-0.63309	0.584592	0.997529	6.84787	platelet
308268	-0.518584	2.28e-30	0.979128	-3.04592	platelet
308322	-9.27826	5.67e-21	0.982238	-15.8285	platelet
309548	-3.56362	0.0324778	0.9829	13.1789	platelet
309726	-6.50017	4.3e-05	0.963432	7.49985	platelet
318582	4.74971	0.0168388	0.99964	14.8508	platelet
319010	5.69893	1.71e-19	0.999295	15.3582	platelet
324346	31.4679	1.1e-50	0.997185	168.04	platelet
326158	20.6815	5.38e-11	0.993536	18.676	platelet
327434	-3.03196	5.85e-08	0.976369	-6.50057	platelet
328584	20.098	0.0153472	0.974606	41.1049	platelet
331740	-3.18785	1.26e-10	0.993428	-4.8629	platelet
333122	1.73514	1.87e-09	0.978791	23.2521	platelet
977272	-10810.7	0.000794233	1	10670.7	platelet
982364	-43.2184	0.482946	0.999882	33929.5	platelet
985338	9697.5	2.9e-07	0.986982	8762.2	platelet
[truncated: 700 more rows]

## Sheet: e
trait	N.causal.PolyFun	N_causal_SbayesRC	N_causal_HFS	HFSR2	HFSAIC	PolyFun_R2	PolyFun_AIC	Fisher_OR	Fisher_p
height	376	721	1055	0.167763	244098	0.0917618	246366	5.07589	4.72e-52
BMI	68	85	239	0.0147979	227690	0.00696018	227443	2.19456	7.85e-12
BMD	11	8	252	0.0671519	-28104.5	0.0271434	-27249.7	2.13009	0.00701733
platelet	170	342	504	0.104823	404410	0.0760667	404618	3.69089	3e-32
intelligence	0	0	41	0.000388534	52724.8	0	0	NA	NA
SBP	32	14	107	0.00862546	311197	0.00337575	310747	2.25976	2.07e-06
chronotype	17	10	67	0.00411184	91531.5	0.00117103	91447.2	1.32763	0.122276
insomnia	6	1	30	1.29e-05	82376.3	0.000431	82194.4	1.351	0.239917
menarche	31	39	104	0.0220092	76245.1	0.00838919	76307.9	1.53386	0.00538513
FVC	45	46	132	0.00939735	89534.2	0.00309614	89510.4	1.60921	0.000311592
asthma	21	11	78	0.0064555	16698.7	0.00244802	16732.8	1.42606	0.0814822
rhinitis	29	28	90	0.00742765	37630.8	0.00453735	37621.3	1.64726	0.00570151
alcohol	11	4	0	NA	NA	NA	NA	NA	NA
smoke	5	1	0	NA	NA	NA	NA	NA	NA

## Sheet: f
trait	type	or	p
insomnia	PC4_Polycomb_/_Bivalent_stem_cell_Enh	6.00028	0.0484502
insomnia	TF2_CEBPB	5.24817	0.00998144
asthma	E11_T-cell	5.23543	0.00855487
intelligence	TF3_FOXA1_/_AR_/_ESR1	4.68922	0.0134614
menarche	PC4_Polycomb_/_Bivalent_stem_cell_Enh	4.24399	0.00792777
SBP	PC4_Polycomb_/_Bivalent_stem_cell_Enh	4.11902	0.00890593
FVC	P_Promoter	3.9106	0.000797485
chronotype	E12_Erythroblast-like	3.57554	0.112085
chronotype	PC1_Polycomb_/_Heterochromatin	3.32078	0.00288684
asthma	TN1_Transcription	3.30831	0.00173809
intelligence	E3_Brain_/_Melanocyte	3.18602	0.0764659
intelligence	E1_Stem_cell	3.10669	0.0298945
SBP	TN4_Transcription	3.09031	0.00622994
rhinitis	TF5_AR	2.96002	0.150508
menarche	L7_Low_signal	2.95795	0.0313635
BMI	PC4_Polycomb_/_Bivalent_stem_cell_Enh	2.91075	0.00791261
height	P_Promoter	2.89078	4.53238e-11
insomnia	E3_Brain_/_Melanocyte	2.88244	0.163499
platelet	E12_Erythroblast-like	2.83811	0.0015712
SBP	TN3_Transcription	2.80708	0.0159728
insomnia	TF4_OTX2	2.76019	0.310984
intelligence	P_Promoter	2.73923	0.173776
insomnia	E2_Multi-tissue	2.73735	0.110542
insomnia	TN4_Transcription	2.73077	0.177474
menarche	E10_Brain	2.58575	0.0502558
rhinitis	E5_B-cell-like	2.55354	0.0255027
rhinitis	TF3_FOXA1_/_AR_/_ESR1	2.55139	0.0531775
insomnia	CTCF_CTCF-Cohesin	2.52423	0.334413
intelligence	E9_Liver_/_Intestine	2.46972	0.202891
rhinitis	HET4_Heterochromatin	2.45712	0.129407
SBP	PC3_Polycomb	2.43393	0.0163174
asthma	E2_Multi-tissue	2.42928	0.0326361
chronotype	TN4_Transcription	2.42756	0.0918349
height	PC4_Polycomb_/_Bivalent_stem_cell_Enh	2.37958	3.89142e-05
asthma	TF2_CEBPB	2.33649	0.0720204
platelet	TN1_Transcription	2.26125	2.12734e-06
SBP	E12_Erythroblast-like	2.21343	0.232171
BMD	P_Promoter	2.20828	0.0285847
rhinitis	E11_T-cell	2.2004	0.234798
BMD	L7_Low_signal	2.16958	0.0418919
platelet	E11_T-cell	2.16189	0.0217538
SBP	CTCF_CTCF-Cohesin	2.11189	0.175814
platelet	P_Promoter	2.09432	0.00389304
BMD	L2_Low_signal	2.07784	0.00387953
rhinitis	L7_Low_signal	2.01913	0.192947
insomnia	L7_Low_signal	2.01892	0.39835
BMI	E10_Brain	2.00375	0.0522139
FVC	TF5_AR	2.00355	0.266475
platelet	E5_B-cell-like	1.9855	0.000817583
BMI	PC1_Polycomb_/_Heterochromatin	1.95469	0.00700453
menarche	TN4_Transcription	1.9311	0.195505
chronotype	E8_Weak_multi-tissue	1.92339	0.166491
platelet	TN3_Transcription	1.91844	0.00519886
FVC	PC2_Weak_Polycomb	1.90076	0.144022
menarche	E11_T-cell	1.89823	0.287691
platelet	PC4_Polycomb_/_Bivalent_stem_cell_Enh	1.87535	0.056728
asthma	HET4_Heterochromatin	1.87499	0.293743
rhinitis	TN3_Transcription	1.8649	0.176767
intelligence	L3_Low_signal	1.86442	0.300575
rhinitis	PC2_Weak_Polycomb	1.85646	0.286469
BMD	TF2_CEBPB	1.85594	0.0356773
chronotype	L2_Low_signal	1.84256	0.206441
menarche	L3_Low_signal	1.83637	0.206747
height	TN3_Transcription	1.83043	0.000192703
intelligence	CTCF_CTCF-Cohesin	1.83012	0.426706
asthma	L4_Low_signal	1.8214	0.290112
FVC	TN4_Transcription	1.82069	0.155467
rhinitis	TF4_OTX2	1.81926	0.305077
menarche	PC1_Polycomb_/_Heterochromatin	1.78321	0.144734
intelligence	TN1_Transcription	1.77566	0.253263
rhinitis	E2_Multi-tissue	1.75989	0.167653
height	TN1_Transcription	1.74823	1.19117e-05
height	TN4_Transcription	1.74516	0.000563316
SBP	PC1_Polycomb_/_Heterochromatin	1.72916	0.151571
intelligence	E4_Multi-tissue	1.70498	0.337417
rhinitis	HET2_Heterochromatin	1.70349	0.229654
menarche	L4_Low_signal	1.7019	0.229578
asthma	TF5_AR	1.69113	0.449431
BMI	E9_Liver_/_Intestine	1.66805	0.16101
menarche	L2_Low_signal	1.64891	0.211721
chronotype	P_Promoter	1.64352	0.34945
BMI	E5_B-cell-like	1.60054	0.135584
height	E11_T-cell	1.5869	0.0644197
chronotype	L1_Low_signal	1.58314	0.330325
platelet	TN4_Transcription	1.58048	0.0476874
BMD	TF5_AR	1.5691	0.447146
intelligence	E5_B-cell-like	1.55233	0.378907
menarche	TN2_Transcription	1.54451	0.234128
asthma	L7_Low_signal	1.54083	0.377594
SBP	P_Promoter	1.54082	0.451549
BMD	TN3_Transcription	1.48505	0.218465
intelligence	HET2_Heterochromatin	1.48496	0.399474
SBP	E5_B-cell-like	1.48392	0.398085
chronotype	E9_Liver_/_Intestine	1.48166	0.39667
rhinitis	E7_Monocyte_/_Macrophage	1.47915	0.462762
intelligence	L7_Low_signal	1.46373	0.500617
SBP	E2_Multi-tissue	1.4636	0.3155
chronotype	TF1_NANOG_/_FOXA1	1.45733	0.46735
FVC	E5_B-cell-like	1.44154	0.321648
FVC	L3_Low_signal	1.43133	0.408536
height	E2_Multi-tissue	1.40805	0.016546
asthma	P_Promoter	1.4056	0.656353
height	L3_Low_signal	1.3964	0.0446355
platelet	PC2_Weak_Polycomb	1.39352	0.190622
rhinitis	HET3_Heterochromatin	1.38604	0.483304
BMD	E8_Weak_multi-tissue	1.38274	0.279151
insomnia	TN3_Transcription	1.38238	0.522491
platelet	E9_Liver_/_Intestine	1.3762	0.26478
insomnia	PC2_Weak_Polycomb	1.37612	0.524075
asthma	E6_Weak_epithelial	1.36393	0.489037
chronotype	TN2_Transcription	1.35882	0.544363
chronotype	HET2_Heterochromatin	1.35738	0.490949
BMD	L3_Low_signal	1.3466	0.32922
height	PC2_Weak_Polycomb	1.32973	0.109173
chronotype	L6_Low_signal	1.32494	0.665816
SBP	TF2_CEBPB	1.32462	0.551455
SBP	E6_Weak_epithelial	1.32421	0.55153
BMD	TN1_Transcription	1.32315	0.275484
rhinitis	TN1_Transcription	1.32303	0.437185
rhinitis	TN4_Transcription	1.31831	0.501299
height	E4_Multi-tissue	1.3109	0.0986419
FVC	E4_Multi-tissue	1.30897	0.441717
BMD	PC2_Weak_Polycomb	1.30861	0.411064
SBP	L4_Low_signal	1.30856	0.554497
FVC	PC4_Polycomb_/_Bivalent_stem_cell_Enh	1.29217	0.67051
height	PC3_Polycomb	1.29126	0.0835371
BMD	TF4_OTX2	1.29116	0.558943
intelligence	L1_Low_signal	1.27864	0.672048
BMI	PC3_Polycomb	1.27849	0.3863
asthma	E9_Liver_/_Intestine	1.26721	0.674014
platelet	E6_Weak_epithelial	1.26312	0.345581
insomnia	L3_Low_signal	1.25356	0.55697
SBP	E7_Monocyte_/_Macrophage	1.23735	0.738199
insomnia	HET1_Heterochromatin	1.23383	0.562624
FVC	TF4_OTX2	1.23148	0.679741
BMI	E11_T-cell	1.23054	0.739702
height	E5_B-cell-like	1.22442	0.218892
asthma	E5_B-cell-like	1.21083	0.740257
BMI	TN3_Transcription	1.20968	0.528795
FVC	PC1_Polycomb_/_Heterochromatin	1.19821	0.530972
FVC	E8_Weak_multi-tissue	1.19257	0.617527
FVC	E10_Brain	1.19043	0.743329
BMI	E1_Stem_cell	1.1824	0.521852
rhinitis	TF2_CEBPB	1.17614	0.744483
BMD	E11_T-cell	1.16627	0.746757
rhinitis	L4_Low_signal	1.16188	0.74628
insomnia	L4_Low_signal	1.16186	0.584154
BMD	L1_Low_signal	1.13809	0.622407
menarche	TN1_Transcription	1.13591	0.631579
asthma	L6_Low_signal	1.13315	0.697781
asthma	E7_Monocyte_/_Macrophage	1.12879	0.698681
menarche	E12_Erythroblast-like	1.12802	0.589912
platelet	TN2_Transcription	1.11706	0.58842
platelet	L5_Low_signal	1.1132	0.594142
SBP	TN1_Transcription	1.10249	0.808058
asthma	PC4_Polycomb_/_Bivalent_stem_cell_Enh	1.09073	0.602797
platelet	E4_Multi-tissue	1.0901	0.690585
BMI	TN1_Transcription	1.08509	0.747561
BMI	TF1_NANOG_/_FOXA1	1.07668	0.711596
height	TF4_OTX2	1.07659	0.778832
rhinitis	TF1_NANOG_/_FOXA1	1.07201	0.760143
insomnia	TF1_NANOG_/_FOXA1	1.072	0.613186
platelet	E2_Multi-tissue	1.07115	0.729276
FVC	TN1_Transcription	1.07096	0.827592
FVC	E1_Stem_cell	1.065	0.828202
menarche	PC3_Polycomb	1.05991	0.792254
asthma	PC3_Polycomb	1.0599	0.762175
asthma	HET3_Heterochromatin	1.05776	0.714598
height	CTCF_CTCF-Cohesin	1.05587	0.788558
asthma	TN3_Transcription	1.05501	0.715262
chronotype	TF2_CEBPB	1.04948	0.716618
chronotype	E6_Weak_epithelial	1.04915	0.716698
platelet	E7_Monocyte_/_Macrophage	1.04624	0.880512
insomnia	E5_B-cell-like	1.04381	0.622841
platelet	TF5_AR	1.0417	0.796704
asthma	TF4_OTX2	1.03953	0.620354
chronotype	L4_Low_signal	1.03675	0.71978
BMD	E10_Brain	1.03619	0.817629
BMI	PC2_Weak_Polycomb	1.02768	0.833872
platelet	PC1_Polycomb_/_Heterochromatin	1.0231	0.913834
FVC	TN2_Transcription	1.0191	0.833939
BMD	E2_Multi-tissue	1.01801	0.870742
BMI	L4_Low_signal	1.01663	0.847031
menarche	TF2_CEBPB	1.01309	0.771993
BMD	PC4_Polycomb_/_Bivalent_stem_cell_Enh	1.01188	0.772879
height	TF3_FOXA1_/_AR_/_ESR1	1.00946	0.91723
asthma	TN4_Transcription	1.00604	1
intelligence	HET3_Heterochromatin	1.00484	1
insomnia	HET2_Heterochromatin	0.998484	1
intelligence	PC2_Weak_Polycomb	0.997681	1
height	PC1_Polycomb_/_Heterochromatin	0.997611	1
height	TF5_AR	0.994863	1
height	L4_Low_signal	0.986133	1
menarche	E2_Multi-tissue	0.985425	1
BMI	E12_Erythroblast-like	0.980445	1
FVC	TF1_NANOG_/_FOXA1	0.971515	1
BMI	E2_Multi-tissue	0.963991	1
platelet	L3_Low_signal	0.962469	1
height	TN2_Transcription	0.953422	0.822878
asthma	CTCF_CTCF-Cohesin	0.950609	1
menarche	E9_Liver_/_Intestine	0.944154	1
asthma	HET1_Heterochromatin	0.941587	1
FVC	E3_Brain_/_Melanocyte	0.938385	1
BMI	L3_Low_signal	0.936101	1
BMI	TN2_Transcription	0.934509	1
chronotype	E5_B-cell-like	0.931374	1
BMI	CTCF_CTCF-Cohesin	0.930449	1
BMI	TF3_FOXA1_/_AR_/_ESR1	0.92655	1
platelet	PC3_Polycomb	0.924872	0.90494
SBP	E9_Liver_/_Intestine	0.917174	1
insomnia	PC3_Polycomb	0.913671	1
rhinitis	PC3_Polycomb	0.913663	1
SBP	E11_T-cell	0.913135	1
BMI	P_Promoter	0.909089	1
BMI	HET4_Heterochromatin	0.905561	1
FVC	L7_Low_signal	0.900731	1
SBP	TF1_NANOG_/_FOXA1	0.896772	1
intelligence	HET1_Heterochromatin	0.894508	1
asthma	L5_Low_signal	0.893392	1
platelet	L4_Low_signal	0.892011	0.790303
chronotype	L7_Low_signal	0.887092	1
FVC	E12_Erythroblast-like	0.886875	1
BMD	PC1_Polycomb_/_Heterochromatin	0.884073	0.878267
platelet	CTCF_CTCF-Cohesin	0.881806	1
BMD	TF3_FOXA1_/_AR_/_ESR1	0.877764	1
BMI	L5_Low_signal	0.874187	1
BMD	E7_Monocyte_/_Macrophage	0.868233	1
menarche	HET2_Heterochromatin	0.860068	1
insomnia	L1_Low_signal	0.859756	1
menarche	TF3_FOXA1_/_AR_/_ESR1	0.850248	1
intelligence	L5_Low_signal	0.848725	1
intelligence	L4_Low_signal	0.842333	1
rhinitis	CTCF_CTCF-Cohesin	0.82242	1
asthma	TF1_NANOG_/_FOXA1	0.818103	1
platelet	E3_Brain_/_Melanocyte	0.816694	0.662359
BMD	E4_Multi-tissue	0.810802	0.850231
menarche	E3_Brain_/_Melanocyte	0.791168	1
FVC	L5_Low_signal	0.789482	1
menarche	HET3_Heterochromatin	0.788076	1
FVC	L4_Low_signal	0.783536	1
menarche	PC2_Weak_Polycomb	0.782468	1
BMI	E8_Weak_multi-tissue	0.779929	0.712186
height	E3_Brain_/_Melanocyte	0.779419	0.315056
FVC	L1_Low_signal	0.77912	0.821245
height	E12_Erythroblast-like	0.77572	0.616079
chronotype	E10_Brain	0.775532	1
insomnia	TN1_Transcription	0.775524	1
rhinitis	L5_Low_signal	0.771549	1
insomnia	E1_Stem_cell	0.771209	1
height	E8_Weak_multi-tissue	0.765017	0.189143
platelet	TF2_CEBPB	0.760852	0.500671
SBP	PC2_Weak_Polycomb	0.760108	1
BMD	PC3_Polycomb	0.756964	0.612173
rhinitis	E4_Multi-tissue	0.755553	1
BMI	L1_Low_signal	0.752214	0.612289
BMI	HET2_Heterochromatin	0.745578	0.590336
BMI	L7_Low_signal	0.744186	0.802943
height	E9_Liver_/_Intestine	0.741169	0.274224
FVC	E9_Liver_/_Intestine	0.740762	1
FVC	E11_T-cell	0.73884	1
platelet	E8_Weak_multi-tissue	0.738612	0.373589
BMD	E5_B-cell-like	0.738205	0.590895
insomnia	TN2_Transcription	0.737946	1
rhinitis	PC1_Polycomb_/_Heterochromatin	0.737748	0.800144
BMI	L6_Low_signal	0.732837	0.825705
BMI	E7_Monocyte_/_Macrophage	0.730015	0.825997
BMD	HET1_Heterochromatin	0.724216	0.69547
SBP	L1_Low_signal	0.719186	0.801266
menarche	CTCF_CTCF-Cohesin	0.710618	1
height	L6_Low_signal	0.704825	0.177351
menarche	HET1_Heterochromatin	0.701542	1
chronotype	TN1_Transcription	0.691988	1
menarche	HET4_Heterochromatin	0.691615	1
BMD	E6_Weak_epithelial	0.69012	0.567474
BMI	L2_Low_signal	0.68925	0.418825
height	L5_Low_signal	0.689102	0.0956193
BMD	L5_Low_signal	0.68714	0.567884
FVC	TF3_FOXA1_/_AR_/_ESR1	0.667085	1
asthma	E10_Brain	0.664729	1
intelligence	PC3_Polycomb	0.662397	1
FVC	E7_Monocyte_/_Macrophage	0.659843	0.773348
chronotype	TF3_FOXA1_/_AR_/_ESR1	0.657001	1
BMD	E3_Brain_/_Melanocyte	0.650725	0.536758
BMI	TN4_Transcription	0.650617	0.536474
chronotype	E7_Monocyte_/_Macrophage	0.64987	1
SBP	L5_Low_signal	0.646612	0.77288
SBP	E1_Stem_cell	0.645109	0.632428
SBP	E4_Multi-tissue	0.633206	0.773322
height	E6_Weak_epithelial	0.624893	0.0409051
FVC	HET3_Heterochromatin	0.618306	0.774889
SBP	TN2_Transcription	0.617283	0.635534
FVC	TN3_Transcription	0.616699	0.775011
menarche	TF1_NANOG_/_FOXA1	0.609537	0.774787
chronotype	HET3_Heterochromatin	0.608963	1
chronotype	TN3_Transcription	0.60738	1
asthma	L2_Low_signal	0.601194	0.77425
rhinitis	P_Promoter	0.600086	1
menarche	E5_B-cell-like	0.593482	0.776484
BMD	HET2_Heterochromatin	0.586053	0.292004
BMI	TF2_CEBPB	0.580445	0.431182
BMI	E6_Weak_epithelial	0.580265	0.43124
BMD	E9_Liver_/_Intestine	0.580042	0.499904
platelet	HET1_Heterochromatin	0.576892	0.131193
height	E7_Monocyte_/_Macrophage	0.576407	0.0380306
rhinitis	E10_Brain	0.57509	1
FVC	E2_Multi-tissue	0.572863	0.496372
intelligence	L2_Low_signal	0.571148	1
rhinitis	L1_Low_signal	0.56662	0.587888
height	E1_Stem_cell	0.564653	0.00225313
height	L7_Low_signal	0.559826	0.0705151
FVC	CTCF_CTCF-Cohesin	0.558703	1
SBP	L7_Low_signal	0.552302	1
BMI	TF5_AR	0.546981	1
BMD	E1_Stem_cell	0.545383	0.160198
FVC	HET4_Heterochromatin	0.543762	1
BMD	L4_Low_signal	0.543337	0.340743
chronotype	HET1_Heterochromatin	0.5421	1
intelligence	PC1_Polycomb_/_Heterochromatin	0.534868	1
height	TF2_CEBPB	0.524771	0.00694602
FVC	TF2_CEBPB	0.524667	0.594897
asthma	E3_Brain_/_Melanocyte	0.524006	1
BMD	TN2_Transcription	0.521856	0.125737
menarche	P_Promoter	0.518508	1
asthma	PC2_Weak_Polycomb	0.518244	1
chronotype	L5_Low_signal	0.514354	1
BMI	E3_Brain_/_Melanocyte	0.512834	0.392811
height	TF1_NANOG_/_FOXA1	0.508698	0.00325669
height	L1_Low_signal	0.505914	0.000965315
platelet	L1_Low_signal	0.504496	0.0270182
BMD	TF1_NANOG_/_FOXA1	0.501319	0.202751
height	E10_Brain	0.48936	0.0177217
menarche	L1_Low_signal	0.48884	0.444198
rhinitis	TN2_Transcription	0.486343	0.442875
rhinitis	L6_Low_signal	0.483769	0.726382
platelet	TF4_OTX2	0.479098	0.305873
platelet	L7_Low_signal	0.46815	0.161073
BMD	E12_Erythroblast-like	0.462785	0.729669
rhinitis	E3_Brain_/_Melanocyte	0.453345	0.728312
platelet	E1_Stem_cell	0.452522	0.00784004
FVC	HET2_Heterochromatin	0.445426	0.333277
platelet	TF1_NANOG_/_FOXA1	0.437653	0.0204446
SBP	L2_Low_signal	0.435131	0.332112
platelet	TF3_FOXA1_/_AR_/_ESR1	0.434292	0.0685542
asthma	E4_Multi-tissue	0.431728	0.73072
BMI	E4_Multi-tissue	0.422513	0.17359
platelet	L2_Low_signal	0.415181	0.00503514
height	HET1_Heterochromatin	0.41122	0.000601933
SBP	TF3_FOXA1_/_AR_/_ESR1	0.40904	0.736982
rhinitis	L3_Low_signal	0.408422	0.736442
FVC	PC3_Polycomb	0.407584	0.247019
height	HET4_Heterochromatin	0.40706	0.0171615
menarche	TN3_Transcription	0.389167	0.524976
rhinitis	E6_Weak_epithelial	0.383071	0.524736
SBP	HET3_Heterochromatin	0.379134	0.526403
asthma	HET2_Heterochromatin	0.376025	0.52472
FVC	L2_Low_signal	0.351436	0.185762
BMD	L6_Low_signal	0.344354	0.137108
platelet	L6_Low_signal	0.344257	0.0231485
SBP	L3_Low_signal	0.342907	0.376177
BMI	HET3_Heterochromatin	0.339079	0.137513
chronotype	E1_Stem_cell	0.338843	0.372142
BMI	TF4_OTX2	0.336231	0.380093
menarche	L5_Low_signal	0.329566	0.376596
asthma	L1_Low_signal	0.323777	0.374835
menarche	E4_Multi-tissue	0.322734	0.377804
BMD	HET3_Heterochromatin	0.321435	0.100346
platelet	HET3_Heterochromatin	0.321341	0.0127601
BMD	TN4_Transcription	0.305726	0.103779
height	HET2_Heterochromatin	0.304703	2.82084e-06
BMI	HET1_Heterochromatin	0.301847	0.0728972
menarche	E8_Weak_multi-tissue	0.29404	0.267863
BMD	CTCF_CTCF-Cohesin	0.291545	0.272931
asthma	E1_Stem_cell	0.290431	0.265242
BMD	HET4_Heterochromatin	0.283749	0.274643
asthma	TN2_Transcription	0.277905	0.267194
asthma	PC1_Polycomb_/_Heterochromatin	0.277838	0.267213
SBP	HET2_Heterochromatin	0.273136	0.272798
FVC	HET1_Heterochromatin	0.27307	0.274891
height	HET3_Heterochromatin	0.268082	2.16272e-05
height	L2_Low_signal	0.262497	1.2796e-08
FVC	E6_Weak_epithelial	0.260217	0.191555
rhinitis	L2_Low_signal	0.256675	0.188573
rhinitis	E1_Stem_cell	0.251267	0.189265
platelet	HET2_Heterochromatin	0.173234	8.87467e-05
platelet	HET4_Heterochromatin	0.141528	0.0123629
platelet	E10_Brain	0.101686	0.00154822
insomnia	P_Promoter	0	1
intelligence	TN4_Transcription	0	0.627935
chronotype	L3_Low_signal	0	0.429226
asthma	L3_Low_signal	0	0.277181
intelligence	E2_Multi-tissue	0	0.409994
chronotype	E2_Multi-tissue	0	0.116035
intelligence	TF2_CEBPB	0	0.632383
chronotype	PC3_Polycomb	0	0.180318
insomnia	E9_Liver_/_Intestine	0	1
rhinitis	E9_Liver_/_Intestine	0	0.268975
intelligence	PC4_Polycomb_/_Bivalent_stem_cell_Enh	0	1
chronotype	PC4_Polycomb_/_Bivalent_stem_cell_Enh	0	1
rhinitis	PC4_Polycomb_/_Bivalent_stem_cell_Enh	0	0.630663
intelligence	E6_Weak_epithelial	0	0.632402
insomnia	E6_Weak_epithelial	0	1
menarche	E6_Weak_epithelial	0	0.1268
intelligence	TN2_Transcription	0	0.262914
intelligence	TF1_NANOG_/_FOXA1	0	0.639869
chronotype	CTCF_CTCF-Cohesin	0	1
intelligence	E8_Weak_multi-tissue	0	0.642614
SBP	E8_Weak_multi-tissue	0	0.0526602
insomnia	E8_Weak_multi-tissue	0	1
asthma	E8_Weak_multi-tissue	0	0.183934
rhinitis	E8_Weak_multi-tissue	0	0.122502
insomnia	PC1_Polycomb_/_Heterochromatin	0	0.64383
insomnia	L5_Low_signal	0	1
intelligence	TN3_Transcription	0	0.627557
chronotype	PC2_Weak_Polycomb	0	0.415733
intelligence	E7_Monocyte_/_Macrophage	0	1
insomnia	E7_Monocyte_/_Macrophage	0	1
menarche	E7_Monocyte_/_Macrophage	0	0.180722
intelligence	L6_Low_signal	0	1
SBP	L6_Low_signal	0	0.18286
insomnia	L6_Low_signal	0	1
menarche	L6_Low_signal	0	0.180475
FVC	L6_Low_signal	0	0.0798456
insomnia	HET3_Heterochromatin	0	1
chronotype	E4_Multi-tissue	0	0.269618
insomnia	E4_Multi-tissue	0	1
intelligence	TF4_OTX2	0	1
SBP	TF4_OTX2	0	0.6459
chronotype	TF4_OTX2	0	1
menarche	TF4_OTX2	0	0.642766
intelligence	E11_T-cell	0	1
chronotype	E11_T-cell	0	1
insomnia	E11_T-cell	0	1
SBP	HET1_Heterochromatin	0	0.124641
rhinitis	HET1_Heterochromatin	0	0.182705
intelligence	E10_Brain	0	1
SBP	E10_Brain	0	0.276475
insomnia	E10_Brain	0	1
insomnia	TF3_FOXA1_/_AR_/_ESR1	0	1
asthma	TF3_FOXA1_/_AR_/_ESR1	0	0.426358
SBP	E3_Brain_/_Melanocyte	0	0.191194
chronotype	E3_Brain_/_Melanocyte	0	0.414583
insomnia	L2_Low_signal	0	0.636786
menarche	E1_Stem_cell	0	0.0244302
intelligence	TF5_AR	0	1
SBP	TF5_AR	0	1
chronotype	TF5_AR	0	1
insomnia	TF5_AR	0	1
menarche	TF5_AR	0	1
intelligence	E12_Erythroblast-like	0	1
insomnia	E12_Erythroblast-like	0	1
asthma	E12_Erythroblast-like	0	1
rhinitis	E12_Erythroblast-like	0	1
intelligence	HET4_Heterochromatin	0	1
SBP	HET4_Heterochromatin	0	0.410519
chronotype	HET4_Heterochromatin	0	1
insomnia	HET4_Heterochromatin	0	1

## Sheet: g
pathway	trait	regression coefficient	standard error	t.value	p value
GO_MEGAKARYOCYTE_DIFFERENTIATION	platelet	0.01072	0.000876768	12.2267	2.26e-34
GO_INSULIN_LIKE_GROWTH_FACTOR_RECEPTOR_SIGNALING_PATHWAY	height	0.0186928	0.00156122	11.9732	4.95e-33
WP_ENDOCHONDRAL_OSSIFICATION	height	0.0112726	0.00103753	10.8648	1.71e-27
REACTOME_PD_1_SIGNALING	rhinitis	0.0145233	0.0014071	10.3215	5.66e-25
BIOCARTA_MHC_PATHWAY	asthma	0.0183483	0.00183065	10.0228	1.22e-23
REACTOME_ELASTIC_FIBRE_FORMATION	height	0.0116481	0.00120306	9.68211	3.61e-22
PID_HEDGEHOG_2PATHWAY	height	0.0159995	0.0016741	9.55703	1.22e-21
GO_REGULATION_OF_BODY_FLUID_LEVELS	platelet	0.00334977	0.00035437	9.45276	3.31e-21
REACTOME_TNFR2_NON_CANONICAL_NF_KB_PATHWAY	asthma	0.0054667	0.000581388	9.40285	5.33e-21
WP_DEVELOPMENT_AND_HETEROGENEITY_OF_THE_ILC_FAMILY	asthma	0.00816446	0.000921146	8.86337	7.78e-19
BIOCARTA_HDAC_PATHWAY	height	0.0157613	0.00180627	8.72589	2.65e-18
NABA_ECM_REGULATORS	height	0.00563921	0.000654273	8.61903	6.77e-18
GO_REGULATION_OF_LYMPHOCYTE_ACTIVATION	rhinitis	0.0022785	0.000272264	8.36871	5.84e-17
GO_REGULATION_OF_CARTILAGE_DEVELOPMENT	height	0.00818646	0.000978821	8.36359	6.1e-17
GO_ENDOCRINE_SYSTEM_DEVELOPMENT	height	0.00670449	0.000812913	8.24749	1.62e-16
REACTOME_COSTIMULATION_BY_THE_CD28_FAMILY	rhinitis	0.00580572	0.000705738	8.22644	1.93e-16
REACTOME_TNFR2_NON_CANONICAL_NF_KB_PATHWAY	rhinitis	0.00488496	0.000596664	8.18711	2.68e-16
WP_ESC_PLURIPOTENCY_PATHWAYS	BMD	0.00459974	0.000562507	8.17721	2.91e-16
GO_B_CELL_HOMEOSTASIS	platelet	0.0111482	0.0013763	8.10014	5.5e-16
GO_REGULATION_OF_LYMPHOCYTE_ACTIVATION	asthma	0.00211796	0.000265299	7.9833	1.43e-15
GO_LYMPHOCYTE_DIFFERENTIATION	rhinitis	0.00231394	0.000290305	7.97073	1.58e-15
GO_CHONDROCYTE_DEVELOPMENT	height	0.011152	0.00140825	7.91902	2.4e-15
WP_FGFR3_SIGNALLING_IN_CHONDROCYTE_PROLIFERATION_AND_TERMINAL_DIFFERENTIATION	height	0.0140894	0.00178476	7.8943	2.92e-15
GO_T_CELL_ACTIVATION	rhinitis	0.00204105	0.000260101	7.84713	4.26e-15
GO_MYELOID_CELL_DIFFERENTIATION	rhinitis	0.00216021	0.000278184	7.76538	8.15e-15
GO_RESPONSE_TO_TUMOR_NECROSIS_FACTOR	rhinitis	0.00261827	0.000338605	7.73251	1.06e-14
WP_THE_HUMAN_IMMUNE_RESPONSE_TO_TUBERCULOSIS	rhinitis	0.00900365	0.00117401	7.66914	1.73e-14
REACTOME_EXTRACELLULAR_MATRIX_ORGANIZATION	height	0.00394003	0.000517418	7.6148	2.64e-14
GO_NEGATIVE_REGULATION_OF_IMMUNE_SYSTEM_PROCESS	rhinitis	0.00203876	0.000271771	7.50177	6.3e-14
WP_INTERACTIONS_BETWEEN_IMMUNE_CELLS_AND_MICRORNAS_IN_TUMOR_MICROENVIRONMENT	rhinitis	0.00765248	0.00102228	7.48573	7.13e-14
GO_GLAND_DEVELOPMENT	height	0.00328689	0.000439103	7.48546	7.14e-14
BIOCARTA_LONGEVITY_PATHWAY	height	0.0164393	0.00220473	7.45636	8.91e-14
WP_SRF_AND_MIRS_IN_SMOOTH_MUSCLE_DIFFERENTIATION_AND_PROLIFERATION	platelet	0.0136529	0.00183253	7.45027	9.33e-14
GO_MYELOID_CELL_DIFFERENTIATION	platelet	0.00281559	0.000379276	7.42359	1.14e-13
GO_DEFINITIVE_HEMOPOIESIS	platelet	0.0116877	0.00157719	7.41049	1.26e-13
GO_ARTERY_DEVELOPMENT	height	0.00617704	0.000835867	7.38997	1.47e-13
WP_THE_HUMAN_IMMUNE_RESPONSE_TO_TUBERCULOSIS	asthma	0.00842298	0.00114398	7.36289	1.8e-13
KEGG_ASTHMA	asthma	0.0109967	0.00150224	7.32019	2.48e-13
PID_BMP_PATHWAY	height	0.00931466	0.00127283	7.31808	2.52e-13
BIOCARTA_KERATINOCYTE_PATHWAY	rhinitis	0.00545058	0.000746251	7.30395	2.8e-13
WP_OSTEOBLAST_DIFFERENTIATION	BMD	0.0037489	0.000518017	7.23702	4.59e-13
PID_EPO_PATHWAY	platelet	0.00865311	0.00119698	7.22914	4.87e-13
GO_GLYCOSIDE_METABOLIC_PROCESS	rhinitis	0.00923306	0.00128418	7.18983	6.5e-13
GO_PLATELET_MORPHOGENESIS	platelet	0.011791	0.00165497	7.12461	1.04e-12
GO_BODY_MORPHOGENESIS	height	0.00896024	0.00126802	7.06632	1.59e-12
GO_GLUCOCORTICOID_METABOLIC_PROCESS	height	0.0141369	0.00200864	7.03806	1.95e-12
GO_ROOF_OF_MOUTH_DEVELOPMENT	FVC	0.00385276	0.000548686	7.0218	2.19e-12
REACTOME_INTERLEUKIN_1_FAMILY_SIGNALING	rhinitis	0.00342952	0.000489974	6.99938	2.57e-12
REACTOME_PLATELET_ACTIVATION_SIGNALING_AND_AGGREGATION	platelet	0.00320935	0.000458533	6.99917	2.58e-12
REACTOME_WNT_LIGAND_BIOGENESIS_AND_TRAFFICKING	BMD	0.00886405	0.00126794	6.99093	2.73e-12
GO_COLLAGEN_FIBRIL_ORGANIZATION	height	0.00832433	0.00119181	6.98463	2.86e-12
KEGG_TYPE_I_DIABETES_MELLITUS	rhinitis	0.00664696	0.000956198	6.95145	3.62e-12
WP_PARKINUBIQUITIN_PROTEASOMAL_SYSTEM_PATHWAY	platelet	0.00690716	0.000995855	6.93591	4.04e-12
PID_CIRCADIAN_PATHWAY	chronotype	0.0107975	0.00155833	6.92888	4.25e-12
REACTOME_HSF1_ACTIVATION	platelet	0.0104263	0.00151576	6.87855	6.05e-12
GO_CORTISOL_METABOLIC_PROCESS	BMD	0.0120906	0.0017604	6.8681	6.51e-12
KEGG_BASAL_CELL_CARCINOMA	BMD	0.00529547	0.00077402	6.84152	7.84e-12
WP_RALA_DOWNSTREAM_REGULATED_GENES	BMD	0.0142321	0.00208121	6.83837	8.02e-12
GO_BONE_MORPHOGENESIS	height	0.00600045	0.000878833	6.82775	8.63e-12
KEGG_WNT_SIGNALING_PATHWAY	BMD	0.00334614	0.000490741	6.81855	9.21e-12
GO_CELL_FATE_COMMITMENT	BMD	0.00251286	0.000369091	6.80824	9.89e-12
GO_PROTEIN_MODIFICATION_BY_SMALL_PROTEIN_REMOVAL	rhinitis	0.00248451	0.000365525	6.79712	1.07e-11
WP_LNCRNA_INVOLVEMENT_IN_CANONICAL_WNT_SIGNALING_AND_COLORECTAL_CANCER	BMD	0.00416679	0.000614232	6.78375	1.17e-11
WP_CANCER_IMMUNOTHERAPY_BY_PD1_BLOCKADE	rhinitis	0.00728176	0.00107355	6.78286	1.18e-11
GO_RESPONSE_TO_TUMOR_NECROSIS_FACTOR	asthma	0.00223761	0.000329946	6.78175	1.19e-11
GO_NEGATIVE_REGULATION_OF_CELL_CYCLE_PROCESS	platelet	0.00299034	0.000441081	6.77958	1.21e-11
GO_CHEMOKINE_SECRETION	rhinitis	0.01102	0.0016284	6.76735	1.31e-11
GO_CHROMATIN_ORGANIZATION_INVOLVED_IN_REGULATION_OF_TRANSCRIPTION	height	0.00743184	0.00109995	6.75651	1.41e-11
GO_CELL_SURFACE_RECEPTOR_SIGNALING_PATHWAY_INVOLVED_IN_HEART_DEVELOPMENT	BMD	0.00643638	0.000952967	6.75404	1.44e-11
WP_VITAMIN_D_RECEPTOR_PATHWAY	rhinitis	0.00275003	0.000407419	6.7499	1.48e-11
REACTOME_INTERLEUKIN_1_FAMILY_SIGNALING	asthma	0.00321836	0.00047744	6.74088	1.58e-11
REACTOME_SIGNALING_BY_INTERLEUKINS	rhinitis	0.00185833	0.000275871	6.73623	1.63e-11
WP_HYPOTHESIZED_PATHWAYS_IN_PATHOGENESIS_OF_CARDIOVASCULAR_DISEASE	height	0.0107888	0.00160188	6.73511	1.64e-11
GO_REGULATION_OF_GTPASE_ACTIVITY	platelet	0.00227941	0.000338594	6.73198	1.68e-11
GO_NEGATIVE_REGULATION_OF_IMMUNE_SYSTEM_PROCESS	asthma	0.00178153	0.00026482	6.7273	1.73e-11
REACTOME_REGULATION_OF_PTEN_STABILITY_AND_ACTIVITY	asthma	0.00460023	0.000683955	6.72593	1.75e-11
GO_BONE_TRABECULA_MORPHOGENESIS	BMD	0.0103938	0.00154542	6.72553	1.75e-11
GO_HOMEOSTASIS_OF_NUMBER_OF_CELLS	platelet	0.00316103	0.000473756	6.67228	2.52e-11
KEGG_ANTIGEN_PROCESSING_AND_PRESENTATION	rhinitis	0.00537506	0.00081065	6.63055	3.35e-11
REACTOME_TNFS_BIND_THEIR_PHYSIOLOGICAL_RECEPTORS	asthma	0.00668073	0.00101291	6.59558	4.24e-11
PID_IL2_STAT5_PATHWAY	height	0.0109103	0.00165694	6.58462	4.56e-11
WP_MECP2_AND_ASSOCIATED_RETT_SYNDROME	height	0.00696625	0.00105882	6.57928	4.73e-11
GO_REGULATION_OF_CELL_CELL_ADHESION	rhinitis	0.00172426	0.000262674	6.56427	5.23e-11
GO_REPRODUCTIVE_SYSTEM_DEVELOPMENT	height	0.0029955	0.000456575	6.56081	5.36e-11
GO_MYELOID_CELL_DEVELOPMENT	platelet	0.00564987	0.000861185	6.56058	5.36e-11
GO_GLYCOSIDE_METABOLIC_PROCESS	FVC	0.00949491	0.00144942	6.55082	5.73e-11
REACTOME_TCR_SIGNALING	rhinitis	0.00337239	0.000515232	6.54539	5.94e-11
GO_PHYSIOLOGICAL_CARDIAC_MUSCLE_HYPERTROPHY	SBP	0.00665523	0.00101824	6.53602	6.32e-11
GO_EXTRACELLULAR_REGULATION_OF_SIGNAL_TRANSDUCTION	height	0.0139561	0.00214809	6.49697	8.2e-11
GO_CELL_SUBSTRATE_ADHESION	BMD	0.0020991	0.000323495	6.48884	8.66e-11
GO_IN_UTERO_EMBRYONIC_DEVELOPMENT	height	0.00322409	0.000497353	6.4825	9.03e-11
REACTOME_TNF_RECEPTOR_SUPERFAMILY_TNFSF_MEMBERS_MEDIATING_NON_CANONICAL_NF_KB_PATHWAY	rhinitis	0.00964779	0.00148937	6.47776	9.32e-11
REACTOME_PLATELET_AGGREGATION_PLUG_FORMATION_	platelet	0.00755811	0.00116846	6.46847	9.91e-11
GO_OSTEOBLAST_PROLIFERATION	height	0.0101596	0.0015855	6.40784	1.48e-10
WP_SIGNALING_PATHWAYS_IN_GLIOBLASTOMA	height	0.0062187	0.000971428	6.40161	1.54e-10
GO_LEUKOCYTE_HOMEOSTASIS	platelet	0.00516619	0.000808653	6.38863	1.67e-10
GO_EMBRYONIC_BRAIN_DEVELOPMENT	BMD	0.0124654	0.0019523	6.38497	1.72e-10
REACTOME_SIGNALING_BY_WNT	BMD	0.00245126	0.000384091	6.38198	1.75e-10
KEGG_T_CELL_RECEPTOR_SIGNALING_PATHWAY	rhinitis	0.00331564	0.000519595	6.38121	1.76e-10
WP_EPITHELIAL_TO_MESENCHYMAL_TRANSITION_IN_COLORECTAL_CANCER	BMD	0.0030834	0.000483209	6.38109	1.76e-10
GO_EMBRYONIC_ORGAN_DEVELOPMENT	height	0.00282598	0.000445188	6.34785	2.19e-10
GO_CORTISOL_METABOLIC_PROCESS	height	0.0165761	0.00261888	6.32947	2.46e-10
WP_TGFBETA_RECEPTOR_SIGNALLING_IN_SKELETAL_DYSPLASIAS	height	0.00688449	0.00108777	6.32902	2.47e-10
WP_REGULATION_OF_TOLLLIKE_RECEPTOR_SIGNALING_PATHWAY	rhinitis	0.0032466	0.000513236	6.32575	2.52e-10
KEGG_MELANOMA	height	0.00664365	0.00105118	6.32016	2.61e-10
GO_GASTRULATION	BMD	0.00271967	0.000430937	6.31107	2.77e-10
KEGG_B_CELL_RECEPTOR_SIGNALING_PATHWAY	rhinitis	0.00383547	0.000609347	6.29439	3.09e-10
GO_RESPIRATORY_SYSTEM_DEVELOPMENT	height	0.0038635	0.000614194	6.29035	3.17e-10
GO_TRANSMEMBRANE_RECEPTOR_PROTEIN_SERINE_THREONINE_KINASE_SIGNALING_PATHWAY	height	0.00308881	0.000491251	6.28765	3.23e-10
GO_EPITHELIAL_CELL_APOPTOTIC_PROCESS	asthma	0.00303323	0.000483888	6.26845	3.65e-10
REACTOME_TCR_SIGNALING	asthma	0.00314549	0.000502051	6.26527	3.72e-10
GO_LYMPHOCYTE_COSTIMULATION	rhinitis	0.00477671	0.00076546	6.24031	4.37e-10
GO_REGULATION_OF_G_PROTEIN_COUPLED_RECEPTOR_SIGNALING_PATHWAY	BMI	0.00373802	0.000600944	6.22025	4.97e-10
WP_APOPTOSIS	height	0.00626884	0.00100962	6.2091	5.33e-10
GO_RESPONSE_TO_INTERLEUKIN_6	rhinitis	0.00490006	0.000790909	6.19548	5.81e-10
GO_MORPHOGENESIS_OF_A_POLARIZED_EPITHELIUM	BMD	0.00326124	0.000526748	6.19128	5.97e-10
REACTOME_UCH_PROTEINASES	rhinitis	0.00398113	0.000644757	6.17461	6.64e-10
GO_HOMEOSTASIS_OF_NUMBER_OF_CELLS	rhinitis	0.00214436	0.000347485	6.17109	6.79e-10
GO_NEGATIVE_REGULATION_OF_INTERLEUKIN_6_PRODUCTION	rhinitis	0.00536028	0.000872125	6.14623	7.94e-10
BIOCARTA_TOB1_PATHWAY	rhinitis	0.00695939	0.00113247	6.14531	7.99e-10
REACTOME_SIGNALING_BY_INTERLEUKINS	asthma	0.00164017	0.000268815	6.1015	1.05e-09
WP_EPITHELIAL_TO_MESENCHYMAL_TRANSITION_IN_COLORECTAL_CANCER	height	0.00436474	0.000718848	6.07186	1.27e-09
GO_REGULATION_OF_CELL_CELL_ADHESION	asthma	0.00155242	0.000255955	6.06522	1.32e-09
GO_REGULATION_OF_ALPHA_BETA_T_CELL_DIFFERENTIATION	asthma	0.00367852	0.000608855	6.04171	1.53e-09
GO_PYRIMIDINE_CONTAINING_COMPOUND_METABOLIC_PROCESS	platelet	0.00596029	0.000986936	6.03918	1.55e-09
PID_AVB3_INTEGRIN_PATHWAY	height	0.00598748	0.000993462	6.02688	1.67e-09
PID_IL12_2PATHWAY	asthma	0.00416184	0.000690907	6.02373	1.71e-09
WP_CANCER_IMMUNOTHERAPY_BY_PD1_BLOCKADE	asthma	0.00629942	0.00104609	6.02184	1.73e-09
GO_REGULATION_OF_ANIMAL_ORGAN_MORPHOGENESIS	BMD	0.00226236	0.000376251	6.01289	1.82e-09
GO_T_CELL_ACTIVATION	asthma	0.00152146	0.000253452	6.00293	1.94e-09
GO_POST_TRANSLATIONAL_PROTEIN_MODIFICATION	height	0.00323097	0.000538673	5.99802	2e-09
SA_PROGRAMMED_CELL_DEATH	platelet	0.0132572	0.002213	5.99061	2.09e-09
KEGG_INTESTINAL_IMMUNE_NETWORK_FOR_IGA_PRODUCTION	asthma	0.00540277	0.000901881	5.99055	2.09e-09
PID_HDAC_CLASSI_PATHWAY	platelet	0.00586118	0.000978575	5.9895	2.11e-09
GO_MESODERMAL_CELL_DIFFERENTIATION	FVC	0.00538282	0.000898878	5.98837	2.12e-09
GO_RESPONSE_TO_COBALT_ION	asthma	0.011276	0.00188365	5.98625	2.15e-09
WP_HEDGEHOG_SIGNALING_PATHWAY	height	0.00803562	0.0013439	5.97933	2.24e-09
NABA_CORE_MATRISOME	height	0.00329342	0.000551311	5.97379	2.32e-09
GO_REGULATION_OF_NUCLEOTIDE_BINDING_OLIGOMERIZATION_DOMAIN_CONTAINING_SIGNALING_PATHWAY	rhinitis	0.0117607	0.00196964	5.971	2.36e-09
GO_REGULATION_OF_EXTRACELLULAR_MATRIX_ORGANIZATION	asthma	0.0048445	0.000811829	5.96739	2.41e-09
WP_SEROTONIN_AND_ANXIETY	rhinitis	0.00781963	0.00131111	5.96411	2.46e-09
GO_BONE_DEVELOPMENT	height	0.00375834	0.000630985	5.9563	2.58e-09
GO_MESENCHYMAL_CELL_PROLIFERATION	BMD	0.00453006	0.000760758	5.95467	2.61e-09
WP_BREAST_CANCER_PATHWAY	height	0.00434097	0.000730146	5.94534	2.76e-09
WP_NAD_METABOLISM_SIRTUINS_AND_AGING	platelet	0.0122938	0.00206814	5.94436	2.78e-09
GO_NEGATIVE_REGULATION_OF_ENDOPLASMIC_RETICULUM_UNFOLDED_PROTEIN_RESPONSE	alcohol	0.00950189	0.00159881	5.94311	2.8e-09
GO_NEGATIVE_REGULATION_OF_CARTILAGE_DEVELOPMENT	height	0.00941963	0.0015862	5.93847	2.88e-09
GO_CD8_POSITIVE_ALPHA_BETA_T_CELL_ACTIVATION	asthma	0.00530303	0.000895247	5.92354	3.15e-09
REACTOME_INTERLEUKIN_7_SIGNALING	asthma	0.00640417	0.00108133	5.92248	3.17e-09
REACTOME_MICRORNA_MIRNA_BIOGENESIS	platelet	0.0101948	0.00172165	5.92156	3.19e-09
GO_REGULATION_OF_CELLULAR_COMPONENT_SIZE	alcohol	0.00164853	0.000278783	5.91331	3.35e-09
GO_CELLULAR_RESPONSE_TO_PURINE_CONTAINING_COMPOUND	asthma	0.00686128	0.00116313	5.89896	3.66e-09
BIOCARTA_NFKB_PATHWAY	rhinitis	0.00687517	0.00116601	5.89633	3.72e-09
GO_REGULATION_OF_MORPHOGENESIS_OF_A_BRANCHING_STRUCTURE	SBP	0.00402065	0.000682774	5.88869	3.89e-09
GO_PROTEASOME_ASSEMBLY	platelet	0.0125786	0.00213615	5.88844	3.9e-09
GO_CORONARY_VASCULATURE_DEVELOPMENT	height	0.00712507	0.00121092	5.88403	4.01e-09
WP_BREAST_CANCER_PATHWAY	BMD	0.00288724	0.000490805	5.88266	4.04e-09
GO_RESPONSE_TO_INTERFERON_ALPHA	asthma	0.00734068	0.00124915	5.87656	4.19e-09
REACTOME_G1_S_DNA_DAMAGE_CHECKPOINTS	platelet	0.00584763	0.000995607	5.87343	4.27e-09
GO_POST_EMBRYONIC_ANIMAL_MORPHOGENESIS	height	0.0149553	0.00254692	5.8719	4.31e-09
REACTOME_TNFS_BIND_THEIR_PHYSIOLOGICAL_RECEPTORS	rhinitis	0.00609596	0.00103951	5.86424	4.51e-09
PID_TCR_CALCIUM_PATHWAY	rhinitis	0.00604235	0.0010312	5.85952	4.64e-09
GO_POSITIVE_REGULATION_OF_CELL_SIZE	menarche	0.00948134	0.00162046	5.85102	4.89e-09
GO_IMMUNE_RESPONSE_REGULATING_SIGNALING_PATHWAY	rhinitis	0.00170794	0.000292158	5.84595	5.04e-09
KEGG_CIRCADIAN_RHYTHM_MAMMAL	chronotype	0.00896219	0.00153332	5.84495	5.07e-09
REACTOME_SYNTHESIS_OF_PROSTAGLANDINS_PG_AND_THROMBOXANES_TX_	insomnia	0.00700791	0.00120046	5.83769	5.3e-09
GO_HORMONE_METABOLIC_PROCESS	height	0.00400275	0.000685794	5.83667	5.33e-09
GO_EMBRYONIC_HEMOPOIESIS	platelet	0.0081755	0.00140342	5.82542	5.7e-09
GO_REGULATION_OF_DNA_TEMPLATED_TRANSCRIPTION_IN_RESPONSE_TO_STRESS	rhinitis	0.00316071	0.000543037	5.82043	5.87e-09
GO_EXTRACELLULAR_MATRIX_DISASSEMBLY	asthma	0.00385951	0.000666881	5.78741	7.15e-09
GO_ENDOCRINE_SYSTEM_DEVELOPMENT	asthma	0.00261484	0.000452105	5.78369	7.31e-09
KEGG_SPHINGOLIPID_METABOLISM	rhinitis	0.00542791	0.000940146	5.77348	7.77e-09
GO_HEMATOPOIETIC_PROGENITOR_CELL_DIFFERENTIATION	asthma	0.00229532	0.000398585	5.75868	8.48e-09
WP_PI3KAKT_SIGNALING_PATHWAY	height	0.00296549	0.000516388	5.74276	9.32e-09
GO_APPENDAGE_DEVELOPMENT	height	0.00357863	0.000624959	5.72617	1.03e-08
WP_EGFR_TYROSINE_KINASE_INHIBITOR_RESISTANCE	height	0.00540667	0.000944455	5.72464	1.04e-08
GO_REGULATION_OF_INFLAMMATORY_RESPONSE	rhinitis	0.00172919	0.000302063	5.72461	1.04e-08
GO_CELL_FATE_DETERMINATION	BMD	0.00495365	0.000865447	5.7238	1.04e-08
GO_NEURAL_TUBE_PATTERNING	BMD	0.00511995	0.000895992	5.71429	1.1e-08
KEGG_TYPE_I_DIABETES_MELLITUS	asthma	0.00532401	0.000931746	5.71402	1.1e-08
GO_RECEPTOR_MEDIATED_ENDOCYTOSIS	platelet	0.00263023	0.000460529	5.71133	1.12e-08
GO_GLUCOCORTICOID_METABOLIC_PROCESS	BMD	0.00770923	0.00135023	5.70958	1.13e-08
GO_ORGANIC_HYDROXY_COMPOUND_CATABOLIC_PROCESS	rhinitis	0.00381846	0.00066887	5.70882	1.14e-08
KEGG_INTESTINAL_IMMUNE_NETWORK_FOR_IGA_PRODUCTION	rhinitis	0.00528144	0.000925564	5.70618	1.16e-08
GO_FAT_SOLUBLE_VITAMIN_METABOLIC_PROCESS	FVC	0.00507901	0.000890342	5.70456	1.17e-08
WP_HEMATOPOIETIC_STEM_CELL_DIFFERENTIATION	platelet	0.00557483	0.000978656	5.69641	1.22e-08
WP_BMP2WNT4FOXO1_PATHWAY_IN_HUMAN_PRIMARY_ENDOMETRIAL_STROMAL_CELL_DIFFERENTIATION	BMD	0.00841748	0.00148017	5.68683	1.29e-08
GO_MITOCHONDRIAL_GENE_EXPRESSION	FVC	0.00317934	0.000560772	5.66957	1.43e-08
WP_LNCRNA_INVOLVEMENT_IN_CANONICAL_WNT_SIGNALING_AND_COLORECTAL_CANCER	height	0.00518023	0.000913773	5.66905	1.44e-08
GO_STRIATED_MUSCLE_CELL_PROLIFERATION	FVC	0.00351253	0.000619772	5.66747	1.45e-08
GO_PROTEIN_NEDDYLATION	rhinitis	0.00897241	0.00158436	5.6631	1.49e-08
GO_MINERALOCORTICOID_METABOLIC_PROCESS	height	0.015223	0.00268855	5.66219	1.5e-08
GO_POSITIVE_REGULATION_OF_CELL_SIZE	alcohol	0.00850749	0.00150655	5.647	1.63e-08
KEGG_PATHWAYS_IN_CANCER	height	0.00280686	0.000497121	5.64623	1.64e-08
GO_REGULATION_OF_PEPTIDASE_ACTIVITY	FVC	0.00181658	0.000321791	5.64521	1.65e-08
GO_INTERLEUKIN_10_PRODUCTION	asthma	0.00404116	0.000716824	5.63759	1.73e-08
NABA_SECRETED_FACTORS	height	0.003341	0.00059283	5.63569	1.74e-08
PID_CD8_TCR_DOWNSTREAM_PATHWAY	rhinitis	0.00423762	0.000751948	5.63552	1.75e-08
REACTOME_DECTIN_1_MEDIATED_NONCANONICAL_NF_KB_SIGNALING	rhinitis	0.00435643	0.00077363	5.63115	1.79e-08
GO_NEGATIVE_REGULATION_OF_MRNA_PROCESSING	chronotype	0.00621152	0.00110348	5.62902	1.81e-08
GO_REGULATION_OF_STEROID_HORMONE_BIOSYNTHETIC_PROCESS	height	0.0134263	0.00239243	5.61199	2e-08
WP_22Q112_DELETION_SYNDROME	platelet	0.00588874	0.00104978	5.60951	2.03e-08
REACTOME_COLLAGEN_FORMATION	height	0.00510891	0.000910953	5.60832	2.04e-08
WP_PRIMARY_FOCAL_SEGMENTAL_GLOMERULOSCLEROSIS_FSGS	BMD	0.00386492	0.000689579	5.60476	2.09e-08
GO_EXOCRINE_SYSTEM_DEVELOPMENT	BMD	0.00422746	0.00075506	5.59883	2.16e-08
GO_NON_CANONICAL_WNT_SIGNALING_PATHWAY	BMD	0.00283623	0.000507205	5.59188	2.25e-08
REACTOME_TNF_RECEPTOR_SUPERFAMILY_TNFSF_MEMBERS_MEDIATING_NON_CANONICAL_NF_KB_PATHWAY	asthma	0.00811488	0.00145128	5.59154	2.25e-08
GO_IMMUNE_RESPONSE_REGULATING_SIGNALING_PATHWAY	asthma	0.00159085	0.000284684	5.58811	2.3e-08
GO_DIENCEPHALON_DEVELOPMENT	height	0.00565652	0.00101275	5.58531	2.33e-08
REACTOME_G1_S_DNA_DAMAGE_CHECKPOINTS	asthma	0.00397298	0.000711561	5.58347	2.36e-08
GO_AMINO_ACID_TRANSPORT	menarche	0.00270347	0.000484389	5.5812	2.39e-08
GO_PROTEIN_LOCALIZATION_TO_CHROMOSOME_TELOMERIC_REGION	chronotype	0.00614022	0.00110077	5.57812	2.43e-08
REACTOME_DECTIN_1_MEDIATED_NONCANONICAL_NF_KB_SIGNALING	asthma	0.00420195	0.000753837	5.57408	2.49e-08
REACTOME_ASSEMBLY_OF_COLLAGEN_FIBRILS_AND_OTHER_MULTIMERIC_STRUCTURES	height	0.0062087	0.00111506	5.56804	2.58e-08
GO_DEPHOSPHORYLATION	height	0.00252712	0.000453937	5.56713	2.59e-08
REACTOME_MRNA_DECAY_BY_3_TO_5_EXORIBONUCLEASE	platelet	0.0116927	0.00210039	5.5669	2.59e-08
GO_NEGATIVE_REGULATION_OF_EMBRYONIC_DEVELOPMENT	BMD	0.00587678	0.00105591	5.56559	2.61e-08
GO_ALPHA_BETA_T_CELL_ACTIVATION	rhinitis	0.00237779	0.000428125	5.55398	2.79e-08
GO_RESPONSE_TO_REDOX_STATE	rhinitis	0.00743546	0.00133981	5.54965	2.86e-08
GO_NUCLEOSIDE_MONOPHOSPHATE_PHOSPHORYLATION	platelet	0.0110913	0.00199928	5.54768	2.9e-08
GO_ANIMAL_ORGAN_MATURATION	height	0.00996483	0.00179745	5.54386	2.96e-08
GO_ALPHA_BETA_T_CELL_ACTIVATION	asthma	0.00231099	0.000417171	5.53965	3.03e-08
WP_PREIMPLANTATION_EMBRYO	asthma	0.0037143	0.000670826	5.53691	3.08e-08
GO_RESPONSE_TO_CHEMOKINE	rhinitis	0.00342497	0.000618871	5.53422	3.13e-08
REACTOME_P75NTR_REGULATES_AXONOGENESIS	SBP	0.0114143	0.00206523	5.52689	3.26e-08
PID_HEDGEHOG_2PATHWAY	FVC	0.00596024	0.00107847	5.52657	3.27e-08
GO_BEHAVIORAL_RESPONSE_TO_COCAINE	alcohol	0.0075676	0.00137087	5.52031	3.39e-08
GO_POSITIVE_REGULATION_OF_MORPHOGENESIS_OF_AN_EPITHELIUM	SBP	0.00520696	0.000943276	5.52008	3.39e-08
WP_BMP2WNT4FOXO1_PATHWAY_IN_HUMAN_PRIMARY_ENDOMETRIAL_STROMAL_CELL_DIFFERENTIATION	insomnia	0.00643822	0.00116757	5.51418	3.51e-08
GO_SENSORY_ORGAN_MORPHOGENESIS	height	0.00303757	0.000551343	5.50942	3.6e-08
GO_PROTEIN_MODIFICATION_BY_SMALL_PROTEIN_REMOVAL	asthma	0.00195844	0.000356178	5.4985	3.83e-08
PID_NFAT_TFPATHWAY	asthma	0.00420485	0.000766713	5.48426	4.15e-08
REACTOME_DISEASES_OF_MITOTIC_CELL_CYCLE	height	0.00861313	0.00157091	5.4829	4.19e-08
GO_CELL_CYCLE_CHECKPOINT	height	0.00374739	0.000683557	5.4822	4.2e-08
GO_GENITALIA_DEVELOPMENT	BMD	0.00486127	0.000887283	5.47883	4.28e-08
GO_REGULATION_OF_APOPTOTIC_PROCESS_INVOLVED_IN_DEVELOPMENT	FVC	0.00827205	0.00150994	5.47838	4.29e-08
REACTOME_L1CAM_INTERACTIONS	insomnia	0.00244608	0.00044683	5.4743	4.39e-08
KEGG_WNT_SIGNALING_PATHWAY	height	0.00399581	0.000730062	5.47325	4.42e-08
GO_EYELID_DEVELOPMENT_IN_CAMERA_TYPE_EYE	insomnia	0.00707452	0.00129256	5.47324	4.42e-08
GO_MITOCHONDRIAL_RNA_PROCESSING	platelet	0.0101758	0.00186013	5.47048	4.49e-08
GO_BROWN_FAT_CELL_DIFFERENTIATION	SBP	0.00414537	0.000758236	5.46713	4.58e-08
GO_REGULATION_OF_STEROID_HORMONE_BIOSYNTHETIC_PROCESS	BMD	0.00878751	0.00160819	5.46422	4.65e-08
WP_NONGENOMIC_ACTIONS_OF_125_DIHYDROXYVITAMIN_D3	rhinitis	0.00340024	0.000623241	5.45574	4.88e-08
GO_INTERLEUKIN_6_PRODUCTION	rhinitis	0.00258019	0.000473576	5.44831	5.09e-08
PID_ALK1_PATHWAY	height	0.00996021	0.001829	5.4457	5.16e-08
GO_REGULATION_OF_DEVELOPMENTAL_GROWTH	height	0.00271566	0.000498703	5.44544	5.17e-08
PID_IL4_2PATHWAY	asthma	0.00373056	0.000685292	5.44375	5.22e-08
GO_POSITIVE_REGULATION_OF_SMALL_GTPASE_MEDIATED_SIGNAL_TRANSDUCTION	platelet	0.00448854	0.000824572	5.44348	5.23e-08
NABA_ECM_REGULATORS	FVC	0.00229208	0.000421482	5.43814	5.39e-08
WP_REGUCALCIN_IN_PROXIMAL_TUBULE_EPITHELIAL_KIDNEY_CELLS	rhinitis	0.00530053	0.000975328	5.43461	5.49e-08
GO_CELL_FATE_DETERMINATION	FVC	0.00450711	0.000829366	5.4344	5.5e-08
GO_NEGATIVE_REGULATION_OF_SMOOTHENED_SIGNALING_PATHWAY	height	0.00850979	0.00156733	5.42948	5.65e-08
GO_CELLULAR_RESPONSE_TO_PURINE_CONTAINING_COMPOUND	FVC	0.00731143	0.00134726	5.42688	5.74e-08
WP_TARGET_OF_RAPAMYCIN_TOR_SIGNALING	alcohol	0.00494369	0.000911368	5.42447	5.81e-08
BIOCARTA_CD40_PATHWAY	rhinitis	0.00761749	0.00140483	5.42235	5.88e-08
REACTOME_HSF1_DEPENDENT_TRANSACTIVATION	platelet	0.00711776	0.00131299	5.42105	5.93e-08
REACTOME_PD_1_SIGNALING	asthma	0.00742898	0.00137119	5.41792	6.03e-08
KEGG_TGF_BETA_SIGNALING_PATHWAY	height	0.00497133	0.000918004	5.41537	6.12e-08
KEGG_CYTOKINE_CYTOKINE_RECEPTOR_INTERACTION	rhinitis	0.00207969	0.000384266	5.41211	6.23e-08
REACTOME_CLEC7A_DECTIN_1_INDUCES_NFAT_ACTIVATION	BMD	0.00871517	0.00161312	5.40268	6.57e-08
WP_PRIMARY_FOCAL_SEGMENTAL_GLOMERULOSCLEROSIS_FSGS	SBP	0.00343482	0.000635893	5.40158	6.61e-08
WP_EICOSANOID_METABOLISM_VIA_LIPO_OXYGENASES_LOX	insomnia	0.00565125	0.00104702	5.39748	6.76e-08
GO_REGULATION_OF_INFLAMMATORY_RESPONSE	asthma	0.00158754	0.000294336	5.39364	6.91e-08
REACTOME_REGULATION_OF_RAS_BY_GAPS	rhinitis	0.0038075	0.000706054	5.39266	6.95e-08
GO_HISTONE_H3_K14_ACETYLATION	rhinitis	0.0103779	0.00192707	5.38534	7.23e-08
GO_ERYTHROCYTE_DEVELOPMENT	BMD	0.0066711	0.00123984	5.38062	7.43e-08
GO_POSITIVE_REGULATION_OF_ION_TRANSPORT	alcohol	0.00179355	0.000334364	5.36408	8.14e-08
GO_EPITHELIAL_CELL_PROLIFERATION	height	0.00245744	0.000458167	5.36364	8.16e-08
GO_SODIUM_ION_TRANSPORT	chronotype	0.00198907	0.000371302	5.35702	8.46e-08
GO_POSITIVE_REGULATION_OF_RESPONSE_TO_DNA_DAMAGE_STIMULUS	smoke	0.00281061	0.000525644	5.34698	8.95e-08
GO_NEGATIVE_REGULATION_OF_CYTOKINE_PRODUCTION	rhinitis	0.00185301	0.000346735	5.34415	9.09e-08
GO_TRABECULA_MORPHOGENESIS	FVC	0.00411442	0.000770042	5.34312	9.14e-08
GO_MUCUS_SECRETION	platelet	0.0117087	0.00219202	5.34149	9.22e-08
GO_RNA_SURVEILLANCE	alcohol	0.00760008	0.00142533	5.33216	9.71e-08
GO_MODULATION_OF_PROCESS_OF_OTHER_ORGANISM	FVC	0.00347733	0.000652701	5.3276	9.96e-08
GO_RETINOIC_ACID_RECEPTOR_SIGNALING_PATHWAY	menarche	0.00487749	0.000915606	5.32706	9.99e-08
GO_PROTEIN_FOLDING	FVC	0.00254392	0.000477714	5.32519	1.01e-07
BIOCARTA_ASBCELL_PATHWAY	asthma	0.0100517	0.00188798	5.32403	1.02e-07
GO_REGULATION_OF_APOPTOTIC_PROCESS_INVOLVED_IN_DEVELOPMENT	height	0.0124782	0.002344	5.32345	1.02e-07
GO_WNT_SIGNALING_PATHWAY_INVOLVED_IN_HEART_DEVELOPMENT	SBP	0.0071237	0.00134097	5.31235	1.08e-07
GO_ECTODERM_DEVELOPMENT	BMD	0.00718658	0.00135295	5.31179	1.09e-07
KEGG_VIRAL_MYOCARDITIS	rhinitis	0.00382894	0.000721216	5.309	1.1e-07
GO_CHROMOSOME_SEGREGATION	BMD	0.00213573	0.000402466	5.30662	1.12e-07
GO_VASCULAR_ASSOCIATED_SMOOTH_MUSCLE_CELL_MIGRATION	platelet	0.00685268	0.00129263	5.30136	1.15e-07
GO_RESPONSE_TO_CAFFEINE	asthma	0.00554038	0.00104712	5.29106	1.22e-07
KEGG_ANTIGEN_PROCESSING_AND_PRESENTATION	alcohol	0.00420681	0.000797523	5.27484	1.33e-07
GO_POSITIVE_REGULATION_OF_MEGAKARYOCYTE_DIFFERENTIATION	platelet	0.0131767	0.00250067	5.26926	1.37e-07
GO_GLOMERULAR_EPITHELIUM_DEVELOPMENT	BMD	0.00630442	0.00119655	5.26884	1.37e-07
WP_MIRNA_REGULATION_OF_DNA_DAMAGE_RESPONSE	height	0.00610942	0.00116058	5.26413	1.41e-07
GO_ALDEHYDE_BIOSYNTHETIC_PROCESS	height	0.0127565	0.00242396	5.26266	1.42e-07
GO_REGULATION_OF_STEROID_METABOLIC_PROCESS	insomnia	0.00246293	0.000468006	5.26261	1.42e-07
GO_REGULATION_OF_DOPAMINERGIC_NEURON_DIFFERENTIATION	asthma	0.0077241	0.00146848	5.25992	1.44e-07
PID_NFKAPPAB_CANONICAL_PATHWAY	rhinitis	0.00572032	0.00108759	5.25963	1.44e-07
GO_NEGATIVE_REGULATION_OF_IMMUNE_RESPONSE	rhinitis	0.00248471	0.000472693	5.25651	1.47e-07
PID_NFKAPPAB_CANONICAL_PATHWAY	asthma	0.00556628	0.00105976	5.25238	1.5e-07
GO_RESPONSE_TO_IMMOBILIZATION_STRESS	BMD	0.00722609	0.00137672	5.24877	1.53e-07
GO_LIPID_EXPORT_FROM_CELL	height	0.00786874	0.00149937	5.24802	1.54e-07
GO_REGULATION_OF_MUSCLE_CELL_DIFFERENTIATION	SBP	0.00238919	0.000455345	5.24699	1.55e-07
GO_POSITIVE_REGULATION_OF_MORPHOGENESIS_OF_AN_EPITHELIUM	asthma	0.00444026	0.000846301	5.24667	1.55e-07
GO_REGULATION_OF_METAL_ION_TRANSPORT	alcohol	0.00147389	0.000280948	5.24612	1.55e-07
BIOCARTA_ALK_PATHWAY	height	0.00708214	0.00135036	5.24465	1.57e-07
GO_RESPONSE_TO_IMMOBILIZATION_STRESS	BMI	0.00777749	0.00148434	5.2397	1.61e-07
REACTOME_ANTIGEN_ACTIVATES_B_CELL_RECEPTOR_BCR_LEADING_TO_GENERATION_OF_SECOND_MESSENGERS	chronotype	0.00489337	0.00093404	5.23893	1.62e-07
GO_POSITIVE_REGULATION_OF_EXTRINSIC_APOPTOTIC_SIGNALING_PATHWAY_IN_ABSENCE_OF_LIGAND	height	0.0150608	0.00287568	5.23729	1.63e-07
GO_RESPONSE_TO_CHEMOKINE	platelet	0.00441528	0.000843767	5.23282	1.67e-07
GO_LACTATE_METABOLIC_PROCESS	chronotype	0.00878913	0.00168314	5.22185	1.77e-07
GO_VASCULAR_ASSOCIATED_SMOOTH_MUSCLE_CONTRACTION	SBP	0.00516393	0.000990541	5.21324	1.86e-07
GO_PROTEOGLYCAN_METABOLIC_PROCESS	height	0.00468102	0.00089863	5.20906	1.9e-07
GO_LYMPHOCYTE_DIFFERENTIATION	asthma	0.00147257	0.000282886	5.20552	1.94e-07
WP_ADIPOGENESIS	BMI	0.0026855	0.000516658	5.19783	2.02e-07
KEGG_ASTHMA	rhinitis	0.00800406	0.00154172	5.19164	2.09e-07
KEGG_BASAL_TRANSCRIPTION_FACTORS	SBP	0.00624032	0.00120295	5.18752	2.13e-07
GO_CAVEOLIN_MEDIATED_ENDOCYTOSIS	SBP	0.0100629	0.00194144	5.1832	2.18e-07
GO_MICROTUBULE_NUCLEATION_BY_MICROTUBULE_ORGANIZING_CENTER	insomnia	0.00817314	0.00157834	5.17831	2.24e-07
KEGG_PYRIMIDINE_METABOLISM	platelet	0.0042673	0.000824556	5.17526	2.28e-07
GO_DOSAGE_COMPENSATION	smoke	0.00720696	0.00139294	5.17391	2.29e-07
WP_VITAMIN_D_IN_INFLAMMATORY_DISEASES	asthma	0.00529126	0.00102357	5.16943	2.35e-07
GO_EMBRYONIC_CAMERA_TYPE_EYE_DEVELOPMENT	SBP	0.0043711	0.000845744	5.16834	2.36e-07
GO_BRANCHING_MORPHOGENESIS_OF_A_NERVE	rhinitis	0.00618592	0.00119862	5.16087	2.46e-07
WP_PREIMPLANTATION_EMBRYO	rhinitis	0.00355238	0.000688442	5.16002	2.47e-07
WP_INITIATION_OF_TRANSCRIPTION_AND_TRANSLATION_ELONGATION_AT_THE_HIV1_LTR	rhinitis	0.00520914	0.00100965	5.15934	2.48e-07
KEGG_T_CELL_RECEPTOR_SIGNALING_PATHWAY	asthma	0.00260862	0.000506307	5.15225	2.57e-07
GO_FC_RECEPTOR_SIGNALING_PATHWAY	asthma	0.00204427	0.000396858	5.15114	2.59e-07
GO_ATF6_MEDIATED_UNFOLDED_PROTEIN_RESPONSE	rhinitis	0.010922	0.00212071	5.15019	2.6e-07
REACTOME_NEGATIVE_REGULATION_OF_TCF_DEPENDENT_SIGNALING_BY_WNT_LIGAND_ANTAGONISTS	BMD	0.00765345	0.00148692	5.14719	2.65e-07
GO_INTERLEUKIN_2_PRODUCTION	asthma	0.00346599	0.000673599	5.14548	2.67e-07
GO_MESENCHYMAL_CELL_PROLIFERATION	SBP	0.00360602	0.000701534	5.1402	2.75e-07
GO_CORONARY_VASCULATURE_DEVELOPMENT	FVC	0.00400919	0.000780047	5.13968	2.75e-07
GO_IMMUNOGLOBULIN_SECRETION	asthma	0.00723528	0.00140829	5.13763	2.78e-07
GO_HORMONE_TRANSPORT	platelet	0.00216084	0.000421016	5.13244	2.86e-07
REACTOME_CELLULAR_RESPONSE_TO_HEAT_STRESS	platelet	0.0042609	0.000830639	5.12967	2.9e-07
REACTOME_SIGNALING_BY_BMP	height	0.0084276	0.00164447	5.12482	2.98e-07
GO_BODY_FLUID_SECRETION	platelet	0.00411119	0.000803021	5.11965	3.06e-07
WP_VITAMIN_D_IN_INFLAMMATORY_DISEASES	height	0.00941813	0.00184049	5.11718	3.1e-07
REACTOME_REGULATION_OF_RUNX1_EXPRESSION_AND_ACTIVITY	height	0.0106095	0.00207464	5.11388	3.16e-07
GO_NEGATIVE_REGULATION_OF_CYTOSKELETON_ORGANIZATION	BMD	0.00265556	0.000519291	5.11382	3.16e-07
GO_NEGATIVE_REGULATION_OF_NUCLEAR_DIVISION	smoke	0.00350297	0.000685109	5.11301	3.17e-07
GO_TRABECULA_MORPHOGENESIS	height	0.00611079	0.0011954	5.11194	3.19e-07
WP_ADIPOGENESIS	height	0.00392736	0.000768607	5.10971	3.23e-07
GO_NEGATIVE_REGULATION_OF_RESPONSE_TO_EXTERNAL_STIMULUS	FVC	0.00165367	0.000323696	5.10871	3.24e-07
REACTOME_MITOTIC_G1_PHASE_AND_G1_S_TRANSITION	platelet	0.00321345	0.000629354	5.10596	3.29e-07
GO_RESPONSE_TO_INTERLEUKIN_1	asthma	0.00198679	0.000389842	5.0964	3.46e-07
GO_APPENDAGE_DEVELOPMENT	BMD	0.00214087	0.000420101	5.09609	3.47e-07
GO_POSITIVE_REGULATION_OF_GENE_EXPRESSION_EPIGENETIC	platelet	0.00600983	0.00117972	5.09429	3.5e-07
REACTOME_MET_ACTIVATES_RAP1_AND_RAC1	rhinitis	0.00830934	0.00163205	5.09136	3.56e-07
KEGG_NATURAL_KILLER_CELL_MEDIATED_CYTOTOXICITY	rhinitis	0.002651	0.000520927	5.089	3.6e-07
WP_GENES_CONTROLLING_RENAL_NEPHROGENESIS	FVC	0.00416384	0.00081844	5.08754	3.63e-07
GO_PHENOL_CONTAINING_COMPOUND_CATABOLIC_PROCESS	rhinitis	0.00975883	0.00191824	5.08738	3.63e-07
REACTOME_MICRORNA_MIRNA_BIOGENESIS	chronotype	0.00652969	0.00128359	5.08706	3.64e-07
GO_CARDIAC_EPITHELIAL_TO_MESENCHYMAL_TRANSITION	BMD	0.00465511	0.000916096	5.08147	3.75e-07
GO_POSITIVE_REGULATION_OF_SIGNAL_TRANSDUCTION_BY_P53_CLASS_MEDIATOR	smoke	0.00542129	0.00106741	5.0789	3.8e-07
REACTOME_AMINO_ACIDS_REGULATE_MTORC1	insomnia	0.00367134	0.000722875	5.0788	3.8e-07
GO_HORMONE_CATABOLIC_PROCESS	height	0.0136063	0.00268034	5.07632	3.85e-07
REACTOME_ACTIVATION_OF_SMO	height	0.0103228	0.00203403	5.07507	3.87e-07
GO_SYNAPTIC_VESICLE_DOCKING	chronotype	0.00812937	0.00160367	5.06922	4e-07
WP_SRF_AND_MIRS_IN_SMOOTH_MUSCLE_DIFFERENTIATION_AND_PROLIFERATION	FVC	0.00768519	0.00151707	5.0658	4.07e-07
REACTOME_ELASTIC_FIBRE_FORMATION	FVC	0.00392599	0.000775023	5.06564	4.07e-07
REACTOME_INTRINSIC_PATHWAY_OF_FIBRIN_CLOT_FORMATION	platelet	0.00887331	0.00175244	5.0634	4.12e-07
BIOCARTA_VDR_PATHWAY	chronotype	0.00596976	0.00118032	5.05777	4.24e-07
WP_TNF_ALPHA_SIGNALING_PATHWAY	rhinitis	0.00294191	0.000581835	5.05626	4.28e-07
GO_DNA_STRAND_ELONGATION	rhinitis	0.00551933	0.00109175	5.0555	4.29e-07
GO_EPITHELIAL_TUBE_MORPHOGENESIS	height	0.00246841	0.000488299	5.05512	4.3e-07
GO_REGULATION_OF_RESPONSE_TO_BIOTIC_STIMULUS	rhinitis	0.00150315	0.000297581	5.05122	4.39e-07
GO_REGULATION_OF_CD4_POSITIVE_ALPHA_BETA_T_CELL_ACTIVATION	rhinitis	0.00331024	0.000656184	5.04468	4.54e-07
GO_NEURON_MIGRATION	chronotype	0.00199455	0.000395386	5.04457	4.55e-07
WP_NONGENOMIC_ACTIONS_OF_125_DIHYDROXYVITAMIN_D3	asthma	0.00306341	0.000607297	5.04433	4.55e-07
GO_REGULATION_OF_ODONTOGENESIS	BMD	0.00579141	0.0011483	5.04346	4.57e-07
GO_GLOMERULUS_DEVELOPMENT	platelet	0.00399373	0.000792522	5.03927	4.67e-07
GO_CORNEA_DEVELOPMENT_IN_CAMERA_TYPE_EYE	SBP	0.00910362	0.00180682	5.03847	4.69e-07
REACTOME_ION_TRANSPORT_BY_P_TYPE_ATPASES	asthma	0.0034199	0.000678867	5.03765	4.71e-07
REACTOME_ARACHIDONIC_ACID_METABOLISM	insomnia	0.00360528	0.000716668	5.03061	4.89e-07
GO_INOSITOL_PHOSPHATE_METABOLIC_PROCESS	rhinitis	0.00315647	0.000627511	5.03015	4.9e-07
GO_SIGNALING_RECEPTOR_LIGAND_PRECURSOR_PROCESSING	height	0.00861215	0.00171375	5.02533	5.03e-07
WP_KISSPEPTINKISSPEPTIN_RECEPTOR_SYSTEM_IN_THE_OVARY	rhinitis	0.00411246	0.000819644	5.01737	5.24e-07
KEGG_SPHINGOLIPID_METABOLISM	asthma	0.00459607	0.000916099	5.017	5.25e-07
GO_NEGATIVE_REGULATION_OF_CYTOSOLIC_CALCIUM_ION_CONCENTRATION	asthma	0.00638027	0.00127228	5.01482	5.31e-07
GO_RESPONSE_TO_BMP	height	0.00342525	0.000684092	5.00701	5.53e-07
GO_VASCULAR_ENDOTHELIAL_CELL_PROLIFERATION	smoke	0.00498638	0.000996465	5.00407	5.62e-07
WP_TYPE_II_INTERFERON_SIGNALING_IFNG	asthma	0.00430211	0.000859789	5.00367	5.63e-07
WP_MITOCHONDRIAL_CIII_ASSEMBLY	asthma	0.00731213	0.00146213	5.00103	5.7e-07
REACTOME_ABORTIVE_ELONGATION_OF_HIV_1_TRANSCRIPT_IN_THE_ABSENCE_OF_TAT	platelet	0.00861218	0.0017241	4.99517	5.88e-07
GO_DENDRITIC_SPINE_DEVELOPMENT	platelet	0.00334293	0.000669307	4.99461	5.9e-07
GO_SODIUM_ION_TRANSPORT	SBP	0.00198132	0.000396724	4.99419	5.91e-07
REACTOME_REGULATION_OF_INSULIN_LIKE_GROWTH_FACTOR_IGF_TRANSPORT_AND_UPTAKE_BY_INSULIN_LIKE_GROWTH_FACTOR_BINDING_PROTEINS_IGFBPS_	height	0.00425644	0.00085275	4.99143	6e-07
WP_BONE_MORPHOGENIC_PROTEIN_BMP_SIGNALLING_AND_REGULATION	height	0.0114326	0.00229113	4.98997	6.04e-07
GO_COLUMNAR_CUBOIDAL_EPITHELIAL_CELL_DIFFERENTIATION	FVC	0.0026827	0.000537887	4.98747	6.12e-07
GO_CHROMATIN_DISASSEMBLY	platelet	0.0108357	0.00217274	4.98711	6.13e-07
WP_HEPATITIS_B_INFECTION	rhinitis	0.00228994	0.000459728	4.98109	6.32e-07
GO_MUSCLE_CELL_DIFFERENTIATION	SBP	0.00151586	0.000304593	4.97666	6.47e-07
KEGG_ALDOSTERONE_REGULATED_SODIUM_REABSORPTION	height	0.00677516	0.00136154	4.9761	6.49e-07
GO_CALCIUM_ION_REGULATED_EXOCYTOSIS_OF_NEUROTRANSMITTER	intelligence	0.00499287	0.00100355	4.97518	6.52e-07
GO_EMBRYONIC_ORGAN_DEVELOPMENT	FVC	0.00142667	0.000286782	4.97474	6.54e-07
GO_CD8_POSITIVE_ALPHA_BETA_T_CELL_ACTIVATION	rhinitis	0.00456953	0.000918761	4.97358	6.57e-07
GO_CELL_COMMUNICATION_INVOLVED_IN_CARDIAC_CONDUCTION	asthma	0.00319007	0.000641796	4.97054	6.68e-07
GO_ENDOSOMAL_TRANSPORT	platelet	0.0025695	0.000517487	4.96535	6.86e-07
GO_REGULATION_OF_CARTILAGE_DEVELOPMENT	BMD	0.00326676	0.00065799	4.96476	6.88e-07
GO_RESPONSE_TO_IRON_ION	insomnia	0.00435461	0.000877271	4.96381	6.91e-07
GO_CELL_FATE_COMMITMENT_INVOLVED_IN_FORMATION_OF_PRIMARY_GERM_LAYER	BMD	0.00470112	0.000947118	4.96361	6.92e-07
PID_HDAC_CLASSII_PATHWAY	platelet	0.00619465	0.00124817	4.96298	6.94e-07
GO_VIRAL_GENE_EXPRESSION	platelet	0.00301985	0.000608962	4.95901	7.09e-07
GO_REGULATION_OF_EXTRACELLULAR_MATRIX_DISASSEMBLY	asthma	0.0071228	0.00143679	4.95743	7.15e-07
GO_POSITIVE_REGULATION_OF_EXTRINSIC_APOPTOTIC_SIGNALING_PATHWAY_IN_ABSENCE_OF_LIGAND	chronotype	0.0082682	0.00166832	4.956	7.2e-07
KEGG_CYTOKINE_CYTOKINE_RECEPTOR_INTERACTION	asthma	0.00185543	0.000374437	4.95526	7.23e-07
GO_CHEMOKINE_PRODUCTION	rhinitis	0.0028957	0.000584992	4.94998	7.42e-07
GO_EPITHELIAL_CELL_FATE_COMMITMENT	asthma	0.00598961	0.00121061	4.9476	7.52e-07
GO_PROSTATE_GLAND_DEVELOPMENT	height	0.00556745	0.00112556	4.94639	7.56e-07
WP_WNT_SIGNALING_PATHWAY_AND_PLURIPOTENCY	BMD	0.00284869	0.000576273	4.9433	7.68e-07
REACTOME_ABC_FAMILY_PROTEINS_MEDIATED_TRANSPORT	platelet	0.00400571	0.000810439	4.94264	7.71e-07
PID_IL12_STAT4_PATHWAY	asthma	0.00463628	0.000938106	4.94217	7.73e-07
GO_GLIAL_CELL_APOPTOTIC_PROCESS	menarche	0.00655096	0.00132572	4.94144	7.76e-07
GO_DRINKING_BEHAVIOR	menarche	0.00945757	0.00191495	4.9388	7.86e-07
GO_REGULATION_OF_DNA_BINDING	SBP	0.00258881	0.000524491	4.93584	7.98e-07
GO_I_KAPPAB_KINASE_NF_KAPPAB_SIGNALING	rhinitis	0.00163573	0.000331749	4.93064	8.2e-07
REACTOME_PLASMA_LIPOPROTEIN_ASSEMBLY_REMODELING_AND_CLEARANCE	platelet	0.00455284	0.000923731	4.92875	8.28e-07
WP_CANONICAL_AND_NONCANONICAL_TGFB_SIGNALING	height	0.00950699	0.00192892	4.92867	8.28e-07
GO_ISOPRENOID_BIOSYNTHETIC_PROCESS	asthma	0.0050597	0.00102676	4.92784	8.32e-07
GO_REGULATION_OF_LEUKOCYTE_MIGRATION	asthma	0.00182334	0.000370037	4.92746	8.33e-07
GO_CARDIAC_CHAMBER_FORMATION	platelet	0.00882738	0.00179154	4.92727	8.34e-07
GO_NEGATIVE_REGULATION_OF_MEIOTIC_CELL_CYCLE	rhinitis	0.00774903	0.0015728	4.9269	8.36e-07
GO_ACTIN_FILAMENT_ORGANIZATION	platelet	0.0017939	0.00036414	4.92641	8.38e-07
GO_NEGATIVE_REGULATION_OF_BINDING	height	0.00376081	0.000764311	4.92053	8.63e-07
GO_POSITIVE_REGULATION_OF_RESPONSE_TO_CYTOKINE_STIMULUS	rhinitis	0.00342148	0.000695475	4.91963	8.67e-07
BIOCARTA_TNFR2_PATHWAY	rhinitis	0.00614728	0.00124965	4.91922	8.69e-07
GO_ENDOTHELIAL_CELL_CHEMOTAXIS	FVC	0.00495495	0.00100744	4.91838	8.73e-07
GO_PATHWAY_RESTRICTED_SMAD_PROTEIN_PHOSPHORYLATION	height	0.00512547	0.00104254	4.91633	8.82e-07
GO_CARDIAC_EPITHELIAL_TO_MESENCHYMAL_TRANSITION	FVC	0.00431557	0.000877902	4.91578	8.85e-07
GO_ACTIVATION_OF_JANUS_KINASE_ACTIVITY	asthma	0.00638021	0.00129888	4.91208	9.01e-07
GO_REGULATION_OF_ANIMAL_ORGAN_FORMATION	SBP	0.00382395	0.000778602	4.9113	9.05e-07
GO_LIPID_HOMEOSTASIS	asthma	0.00236362	0.000481494	4.90892	9.16e-07
GO_LYMPHOCYTE_MIGRATION	rhinitis	0.00267949	0.000545976	4.90771	9.22e-07
GO_MUSCLE_CELL_DIFFERENTIATION	FVC	0.00155327	0.000316538	4.90704	9.25e-07
PID_RXR_VDR_PATHWAY	menarche	0.00503285	0.00102578	4.90635	9.28e-07
GO_NEGATIVE_REGULATION_OF_RESPONSE_TO_DNA_DAMAGE_STIMULUS	FVC	0.00369002	0.000752943	4.9008	9.55e-07
GO_CHRONIC_INFLAMMATORY_RESPONSE	asthma	0.00605117	0.00123666	4.89315	9.93e-07
WNT_SIGNALING	BMD	0.00315002	0.000644492	4.8876	1.02e-06
GO_RETROGRADE_TRANSPORT_ENDOSOME_TO_PLASMA_MEMBRANE	platelet	0.00781323	0.00160006	4.88309	1.04e-06
REACTOME_MTOR_SIGNALLING	chronotype	0.00476747	0.000976748	4.88096	1.06e-06
GO_REGULATION_OF_ALPHA_BETA_T_CELL_DIFFERENTIATION	rhinitis	0.00304971	0.000624848	4.88072	1.06e-06
WP_TCELL_ANTIGEN_RECEPTOR_TCR_SIGNALING_PATHWAY	rhinitis	0.00266647	0.000546367	4.88036	1.06e-06
GO_DOSAGE_COMPENSATION	BMI	0.0091269	0.00187057	4.87922	1.07e-06
GO_APOPTOTIC_PROCESS_INVOLVED_IN_DEVELOPMENT	FVC	0.00432374	0.000887529	4.87166	1.11e-06
GO_ARTERY_DEVELOPMENT	FVC	0.00262294	0.000538459	4.87121	1.11e-06
BIOCARTA_GPCR_PATHWAY	rhinitis	0.0044494	0.000913526	4.87057	1.11e-06
WP_ROLE_OF_OSX_AND_MIRNAS_IN_TOOTH_DEVELOPMENT	BMD	0.00739816	0.00151929	4.86947	1.12e-06
PID_TCR_PATHWAY	rhinitis	0.00313558	0.000644171	4.86762	1.13e-06
GO_MACROPHAGE_ACTIVATION	rhinitis	0.00258893	0.000532101	4.86549	1.14e-06
GO_REGULATION_OF_EPITHELIAL_CELL_DIFFERENTIATION	asthma	0.00199816	0.000411306	4.85808	1.19e-06
GO_NEGATIVE_REGULATION_OF_INTERLEUKIN_6_PRODUCTION	asthma	0.00412774	0.000849822	4.85718	1.19e-06
WP_GASTRIC_CANCER_NETWORK_1	height	0.0087801	0.00180971	4.85165	1.22e-06
GO_PHARYNGEAL_SYSTEM_DEVELOPMENT	height	0.00737727	0.00152198	4.84715	1.25e-06
GO_RESPONSE_TO_FIBROBLAST_GROWTH_FACTOR	FVC	0.00234674	0.000484249	4.84614	1.26e-06
GO_REGULATION_OF_NON_CANONICAL_WNT_SIGNALING_PATHWAY	BMD	0.00545692	0.00112723	4.84102	1.29e-06
REACTOME_FORMATION_OF_FIBRIN_CLOT_CLOTTING_CASCADE_	platelet	0.00645079	0.00133319	4.83861	1.31e-06
GO_REGULATION_OF_ENDOCYTOSIS	platelet	0.00249877	0.000516939	4.83377	1.34e-06
WP_ESC_PLURIPOTENCY_PATHWAYS	height	0.00404382	0.000836846	4.83222	1.35e-06
GO_ASYMMETRIC_CELL_DIVISION	platelet	0.00736386	0.001524	4.83192	1.35e-06
GO_DEVELOPMENTAL_MATURATION	height	0.00284701	0.000589245	4.83162	1.35e-06
WP_EXTRACELLULAR_VESICLEMEDIATED_SIGNALING_IN_RECIPIENT_CELLS	BMD	0.00483172	0.00100048	4.82938	1.37e-06
KEGG_ARACHIDONIC_ACID_METABOLISM	insomnia	0.00366349	0.000758685	4.82873	1.37e-06
GO_B_CELL_DIFFERENTIATION	rhinitis	0.00236132	0.000489015	4.82872	1.37e-06
WP_ESTROGEN_SIGNALING_PATHWAY	SBP	0.00619418	0.00128424	4.82321	1.41e-06
REACTOME_TRANSCRIPTIONAL_REGULATION_OF_GRANULOPOIESIS	rhinitis	0.00415084	0.000860633	4.82301	1.41e-06
GO_MAINTENANCE_OF_CELL_NUMBER	height	0.00335416	0.000695793	4.82063	1.43e-06
GO_TELOMERE_ORGANIZATION	chronotype	0.00237869	0.000493486	4.82017	1.43e-06
GO_MINERALOCORTICOID_METABOLIC_PROCESS	BMD	0.00870995	0.00180726	4.81943	1.44e-06
GO_PROTEIN_LOCALIZATION_TO_CHROMOSOME_TELOMERIC_REGION	SBP	0.00566227	0.00117614	4.81427	1.48e-06
GO_PROXIMAL_DISTAL_PATTERN_FORMATION	BMD	0.00468897	0.000974541	4.81147	1.5e-06
REACTOME_HSF1_DEPENDENT_TRANSACTIVATION	chronotype	0.00469899	0.000978903	4.80025	1.59e-06
GO_PARASYMPATHETIC_NERVOUS_SYSTEM_DEVELOPMENT	insomnia	0.00473726	0.000987348	4.79797	1.6e-06
BIOCARTA_GATA3_PATHWAY	asthma	0.00627778	0.00130912	4.79543	1.62e-06
BIOCARTA_TOB1_PATHWAY	asthma	0.00528966	0.00110351	4.79348	1.64e-06
WP_SEROTONIN_AND_ANXIETY	intelligence	0.00613332	0.00128098	4.78799	1.69e-06
REACTOME_REGULATION_OF_RAS_BY_GAPS	asthma	0.00328988	0.000687993	4.78185	1.74e-06
GO_ANDROGEN_METABOLIC_PROCESS	BMD	0.00534267	0.00111747	4.78106	1.74e-06
GO_MATURATION_OF_5_8S_RRNA	FVC	0.00521955	0.00109222	4.77886	1.76e-06
GO_PLASMINOGEN_ACTIVATION	FVC	0.00673244	0.00140922	4.77743	1.78e-06
GO_RESPONSE_TO_FUNGUS	FVC	0.00515209	0.0010788	4.77578	1.79e-06
GO_BILE_ACID_METABOLIC_PROCESS	smoke	0.00351523	0.000736088	4.77556	1.79e-06
GO_RNA_CATABOLIC_PROCESS	chronotype	0.0015009	0.000314375	4.77424	1.8e-06
GO_PROTEIN_KINASE_B_SIGNALING	FVC	0.00176745	0.000370348	4.77239	1.82e-06
REACTOME_CYCLIN_A_CDK2_ASSOCIATED_EVENTS_AT_S_PHASE_ENTRY	platelet	0.00405232	0.00084917	4.77209	1.82e-06
GO_REGULATION_OF_PLASMA_LIPOPROTEIN_PARTICLE_LEVELS	platelet	0.00397553	0.000833321	4.77071	1.84e-06
GO_SENSORY_ORGAN_MORPHOGENESIS	SBP	0.00163024	0.000341761	4.77013	1.84e-06
GO_POSITIVE_REGULATION_OF_MYOBLAST_DIFFERENTIATION	height	0.00902465	0.00189263	4.76831	1.86e-06
REACTOME_INTEGRATION_OF_ENERGY_METABOLISM	platelet	0.00326497	0.000685011	4.7663	1.88e-06
ST_G_ALPHA_I_PATHWAY	insomnia	0.00386299	0.000810723	4.76487	1.89e-06
GO_PHENOL_CONTAINING_COMPOUND_CATABOLIC_PROCESS	smoke	0.00863548	0.0018139	4.76072	1.93e-06
GO_REGULATION_OF_CELLULAR_RESPONSE_TO_GROWTH_FACTOR_STIMULUS	height	0.00249414	0.000523904	4.76069	1.93e-06
GO_RESPONSE_TO_MISFOLDED_PROTEIN	insomnia	0.00533137	0.00112062	4.75753	1.96e-06
WP_IMATINIB_AND_CHRONIC_MYELOID_LEUKEMIA	platelet	0.00707603	0.00148796	4.75551	1.98e-06
WP_MITOCHONDRIAL_CIII_ASSEMBLY	FVC	0.00805259	0.00169358	4.75477	1.99e-06
PID_TCR_CALCIUM_PATHWAY	asthma	0.00477768	0.00100483	4.75472	1.99e-06
KEGG_ADHERENS_JUNCTION	height	0.0048263	0.00101529	4.75363	2e-06
GO_SYNAPTIC_TRANSMISSION_CHOLINERGIC	FVC	0.00541301	0.00113882	4.75318	2e-06
GO_RESPONSE_TO_OXYGEN_GLUCOSE_DEPRIVATION	platelet	0.0123172	0.00259187	4.75225	2.01e-06
GO_REGULATION_OF_PROTEIN_MODIFICATION_BY_SMALL_PROTEIN_CONJUGATION_OR_REMOVAL	menarche	0.00191773	0.00040365	4.75097	2.02e-06
GO_PROTEIN_NEDDYLATION	insomnia	0.0069923	0.00147194	4.75039	2.03e-06
WP_TLR4_SIGNALING_AND_TOLERANCE	rhinitis	0.00509343	0.00107313	4.74633	2.07e-06
REACTOME_INTRACELLULAR_SIGNALING_BY_SECOND_MESSENGERS	rhinitis	0.00149727	0.000315493	4.74583	2.08e-06
REACTOME_OPIOID_SIGNALLING	chronotype	0.00271804	0.000574307	4.73274	2.22e-06
GO_THYMIC_T_CELL_SELECTION	asthma	0.00477658	0.00100936	4.7323	2.22e-06
WP_EXERCISEINDUCED_CIRCADIAN_REGULATION	asthma	0.00349885	0.000739593	4.73077	2.24e-06
GO_ORGANIC_HYDROXY_COMPOUND_BIOSYNTHETIC_PROCESS	height	0.00293806	0.000621445	4.72778	2.27e-06
GO_POSITIVE_REGULATION_OF_CALCIUM_ION_TRANSPORT	alcohol	0.00239752	0.00050741	4.72501	2.3e-06
PID_RB_1PATHWAY	height	0.00562151	0.00119017	4.72329	2.32e-06
GO_REGULATION_OF_CELLULAR_COMPONENT_SIZE	smoke	0.00126535	0.000267964	4.72209	2.33e-06
GO_RESPONSE_TO_REDOX_STATE	menarche	0.00669311	0.00141777	4.72088	2.35e-06
GO_REGULATION_OF_ANIMAL_ORGAN_MORPHOGENESIS	FVC	0.00170192	0.000360568	4.7201	2.36e-06
PID_BCR_5PATHWAY	asthma	0.00306488	0.000649384	4.71968	2.36e-06
GO_LEUKOCYTE_APOPTOTIC_PROCESS	asthma	0.00237892	0.000504286	4.71739	2.39e-06
KEGG_PATHOGENIC_ESCHERICHIA_COLI_INFECTION	BMD	0.00400702	0.000849764	4.71545	2.41e-06
WP_VITAMIN_D_RECEPTOR_PATHWAY	asthma	0.00187177	0.000397003	4.71474	2.42e-06
REACTOME_INHIBITION_OF_DNA_RECOMBINATION_AT_TELOMERE	platelet	0.00933554	0.00198049	4.71376	2.43e-06
GO_MESENCHYME_MORPHOGENESIS	height	0.00498372	0.00105775	4.71162	2.46e-06
REACTOME_FGFR2_ALTERNATIVE_SPLICING	platelet	0.00711194	0.00151038	4.7087	2.49e-06
GO_POSITIVE_REGULATION_OF_SECRETION	smoke	0.00129111	0.000274378	4.7056	2.53e-06
GO_REGULATION_OF_PROTEIN_MODIFICATION_BY_SMALL_PROTEIN_CONJUGATION_OR_REMOVAL	chronotype	0.00182409	0.000387743	4.70437	2.55e-06
GO_NEURAL_PRECURSOR_CELL_PROLIFERATION	height	0.00342584	0.000728797	4.70068	2.59e-06
GO_POSITIVE_REGULATION_OF_CELL_CYCLE	height	0.00246293	0.000524399	4.69667	2.64e-06
KEGG_GLYCOSAMINOGLYCAN_DEGRADATION	rhinitis	0.00558133	0.00118846	4.69627	2.65e-06
GO_POST_EMBRYONIC_ANIMAL_ORGAN_DEVELOPMENT	height	0.00937537	0.00199776	4.69294	2.69e-06
WP_ECTODERM_DIFFERENTIATION	height	0.00339115	0.000722675	4.69249	2.7e-06
GO_NECROTIC_CELL_DEATH	FVC	0.00411041	0.000876052	4.69197	2.71e-06
GO_MIDBRAIN_DEVELOPMENT	BMD	0.00314525	0.000670536	4.69065	2.72e-06
PID_NFAT_TFPATHWAY	rhinitis	0.0036906	0.000786849	4.69035	2.73e-06
GO_ROSTROCAUDAL_NEURAL_TUBE_PATTERNING	BMD	0.00778957	0.00166094	4.68987	2.73e-06
GO_RETINOIC_ACID_RECEPTOR_SIGNALING_PATHWAY	height	0.00710969	0.00151605	4.68962	2.74e-06
KEGG_ARACHIDONIC_ACID_METABOLISM	intelligence	0.00374039	0.00079786	4.68803	2.76e-06
ST_G_ALPHA_I_PATHWAY	asthma	0.00398549	0.000850323	4.68703	2.77e-06
GO_PLATELET_ACTIVATION	platelet	0.00271162	0.000578623	4.68634	2.78e-06
GO_REGULATION_OF_DNA_BINDING	rhinitis	0.00226172	0.000482925	4.68338	2.82e-06
GO_NEURON_CELL_CELL_ADHESION	BMD	0.00604034	0.00129019	4.68175	2.84e-06
WP_VITAMIN_A_AND_CAROTENOID_METABOLISM	FVC	0.00432402	0.000923697	4.68121	2.85e-06
GO_POLYOL_CATABOLIC_PROCESS	rhinitis	0.005441	0.00116251	4.68038	2.86e-06
GO_RESPONSE_TO_ATP	asthma	0.00428651	0.000915911	4.68005	2.87e-06
GO_QUINONE_METABOLIC_PROCESS	smoke	0.00436473	0.000932993	4.6782	2.89e-06
WP_REGULATION_OF_WNTBCATENIN_SIGNALING_BY_SMALL_MOLECULE_COMPOUNDS	BMD	0.00594146	0.00127014	4.6778	2.9e-06
GO_NEGATIVE_REGULATION_OF_GLIOGENESIS	height	0.00658428	0.00140949	4.67141	2.99e-06
GO_POST_EMBRYONIC_ANIMAL_ORGAN_DEVELOPMENT	platelet	0.00726174	0.00155454	4.6713	2.99e-06
GO_NEGATIVE_REGULATION_OF_SYNAPTIC_TRANSMISSION_GLUTAMATERGIC	insomnia	0.00808004	0.00173037	4.66955	3.02e-06
KEGG_AUTOIMMUNE_THYROID_DISEASE	rhinitis	0.00501848	0.00107521	4.66744	3.05e-06
GO_MUSCLE_ORGAN_MORPHOGENESIS	FVC	0.00283437	0.000607312	4.66707	3.06e-06
GO_COVALENT_CHROMATIN_MODIFICATION	SBP	0.00140056	0.000300354	4.66304	3.12e-06
GO_MYELOID_CELL_DEVELOPMENT	rhinitis	0.00294519	0.00063166	4.66262	3.12e-06
REACTOME_AMINO_ACIDS_REGULATE_MTORC1	alcohol	0.00356798	0.000765483	4.66108	3.15e-06
BIOCARTA_BAD_PATHWAY	height	0.00879208	0.00188638	4.66081	3.15e-06
GO_SECRETION_BY_TISSUE	platelet	0.00628103	0.00134898	4.65613	3.22e-06
GO_NEUROEPITHELIAL_CELL_DIFFERENTIATION	BMD	0.00374522	0.000804897	4.65304	3.27e-06
GO_SYNAPTONEMAL_COMPLEX_ORGANIZATION	SBP	0.00735224	0.00158354	4.64291	3.44e-06
REACTOME_INTRINSIC_PATHWAY_OF_FIBRIN_CLOT_FORMATION	FVC	0.00673304	0.00145074	4.64112	3.47e-06
REACTOME_PCP_CE_PATHWAY	BMD	0.00305747	0.000658792	4.64102	3.47e-06
REACTOME_FGFRL1_MODULATION_OF_FGFR1_SIGNALING	height	0.0116811	0.00251694	4.641	3.47e-06
REACTOME_REGULATION_OF_TLR_BY_ENDOGENOUS_LIGAND	rhinitis	0.00625047	0.00134685	4.64079	3.47e-06
BIOCARTA_AHSP_PATHWAY	smoke	0.00845584	0.00182209	4.64074	3.47e-06
GO_AMINO_ACID_TRANSPORT	BMI	0.0026971	0.000581281	4.63992	3.49e-06
GO_DETECTION_OF_BIOTIC_STIMULUS	asthma	0.00432664	0.000932813	4.63827	3.51e-06
BIOCARTA_TID_PATHWAY	rhinitis	0.00589343	0.00127148	4.63507	3.57e-06
GO_FIBROBLAST_PROLIFERATION	height	0.00471303	0.00101686	4.63489	3.57e-06
GO_CARDIAC_NEURAL_CREST_CELL_DIFFERENTIATION_INVOLVED_IN_HEART_DEVELOPMENT	BMD	0.00739525	0.00159578	4.63427	3.58e-06
WP_GLUCURONIDATION	BMD	0.00739305	0.00159587	4.63262	3.61e-06
WP_PHYSIOLOGICAL_AND_PATHOLOGICAL_HYPERTROPHY_OF_THE_HEART	SBP	0.00505392	0.00109137	4.63079	3.64e-06
GO_NERVOUS_SYSTEM_PROCESS_INVOLVED_IN_REGULATION_OF_SYSTEMIC_ARTERIAL_BLOOD_PRESSURE	alcohol	0.00761119	0.00164397	4.62975	3.66e-06
GO_NEUROMUSCULAR_SYNAPTIC_TRANSMISSION	rhinitis	0.0051604	0.00111466	4.62958	3.66e-06
GO_MYD88_INDEPENDENT_TOLL_LIKE_RECEPTOR_SIGNALING_PATHWAY	rhinitis	0.00430463	0.000930308	4.62711	3.71e-06
GO_REGULATION_OF_DNA_TEMPLATED_TRANSCRIPTION_IN_RESPONSE_TO_STRESS	asthma	0.00244832	0.000529149	4.6269	3.71e-06
GO_NEGATIVE_REGULATION_OF_I_KAPPAB_KINASE_NF_KAPPAB_SIGNALING	SBP	0.00396831	0.000857882	4.6257	3.73e-06
GO_MAMMARY_GLAND_DEVELOPMENT	height	0.00343072	0.000741783	4.62497	3.75e-06
GO_MACROMOLECULE_DEACYLATION	platelet	0.00339908	0.000735418	4.62197	3.8e-06
GO_COLUMNAR_CUBOIDAL_EPITHELIAL_CELL_DIFFERENTIATION	BMD	0.00259408	0.000561291	4.62162	3.81e-06
GO_T_HELPER_1_TYPE_IMMUNE_RESPONSE	asthma	0.00357969	0.00077542	4.61645	3.9e-06
PID_ALK1_PATHWAY	BMD	0.00567403	0.00122947	4.61504	3.93e-06
WP_LUNG_FIBROSIS	FVC	0.00370917	0.000803898	4.61399	3.95e-06
REACTOME_GLUCOCORTICOID_BIOSYNTHESIS	height	0.0185296	0.00401622	4.6137	3.96e-06
WP_EICOSANOID_METABOLISM_VIA_LIPO_OXYGENASES_LOX	intelligence	0.00507893	0.00110108	4.61266	3.98e-06
GO_RESPONSE_TO_COBALT_ION	rhinitis	0.00891551	0.00193313	4.61195	3.99e-06
GO_IRON_ION_TRANSMEMBRANE_TRANSPORT	height	0.0117842	0.00255591	4.61057	4.02e-06
GO_REGULATION_OF_VASCULAR_ASSOCIATED_SMOOTH_MUSCLE_CELL_PROLIFERATION	platelet	0.00442479	0.000959858	4.60984	4.03e-06
REACTOME_INTRACELLULAR_SIGNALING_BY_SECOND_MESSENGERS	BMD	0.00171275	0.000371578	4.60939	4.04e-06
WP_PROTEASOME_DEGRADATION	rhinitis	0.00353824	0.00076771	4.60882	4.05e-06
GO_INOSITOL_PHOSPHATE_MEDIATED_SIGNALING	BMD	0.00355431	0.000771229	4.60863	4.05e-06
KEGG_VIRAL_MYOCARDITIS	asthma	0.0032385	0.000702768	4.60821	4.06e-06
PID_IL12_STAT4_PATHWAY	rhinitis	0.00443225	0.00096274	4.60378	4.15e-06
GO_ACTIN_FILAMENT_ORGANIZATION	SBP	0.00133467	0.000290074	4.60115	4.2e-06
GO_POSITIVE_REGULATION_OF_RESPONSE_TO_ENDOPLASMIC_RETICULUM_STRESS	height	0.00763832	0.00166053	4.59993	4.23e-06
GO_PRODUCTION_OF_SMALL_RNA_INVOLVED_IN_GENE_SILENCING_BY_RNA	BMD	0.0043592	0.000948207	4.59731	4.28e-06
GO_ANIMAL_ORGAN_MATURATION	asthma	0.00459508	0.00099964	4.59673	4.29e-06
PID_CDC42_REG_PATHWAY	BMD	0.0049674	0.00108078	4.59611	4.31e-06
REACTOME_MTOR_SIGNALLING	alcohol	0.00434409	0.000945342	4.59526	4.32e-06
WP_WNTBETACATENIN_SIGNALING_PATHWAY_IN_LEUKEMIA	height	0.00713136	0.00155358	4.59028	4.43e-06
BIOCARTA_PROTEASOME_PATHWAY	rhinitis	0.00643815	0.00140257	4.59026	4.43e-06
GO_PRODUCTION_OF_SMALL_RNA_INVOLVED_IN_GENE_SILENCING_BY_RNA	height	0.00647253	0.0014106	4.58849	4.47e-06
WP_TRIACYLGLYCERIDE_SYNTHESIS	chronotype	0.00576383	0.00125635	4.58777	4.48e-06
GO_INTERLEUKIN_4_PRODUCTION	asthma	0.00394057	0.000858946	4.58768	4.48e-06
GO_POSITIVE_REGULATION_OF_EMBRYONIC_DEVELOPMENT	BMD	0.00437246	0.000953468	4.58585	4.52e-06
GO_HEMATOPOIETIC_PROGENITOR_CELL_DIFFERENTIATION	menarche	0.00198493	0.000432853	4.58569	4.53e-06
WP_HEART_DEVELOPMENT	height	0.00572975	0.00124986	4.58431	4.56e-06
WP_OSTEOBLAST_DIFFERENTIATION	height	0.00353218	0.00077065	4.58337	4.58e-06
GO_WNT_SIGNALING_PATHWAY_INVOLVED_IN_HEART_DEVELOPMENT	BMD	0.0066644	0.00145419	4.58288	4.59e-06
REACTOME_TP53_REGULATES_METABOLIC_GENES	alcohol	0.00282786	0.000617246	4.58141	4.62e-06
GO_GASTRULATION	FVC	0.00189098	0.000412977	4.5789	4.68e-06
REACTOME_NUCLEOTIDE_EXCISION_REPAIR	chronotype	0.0026851	0.000586584	4.57752	4.71e-06
GO_ANATOMICAL_STRUCTURE_HOMEOSTASIS	asthma	0.00121137	0.000264657	4.57714	4.71e-06
GO_REGULATION_OF_HISTONE_UBIQUITINATION	chronotype	0.00749454	0.0016379	4.5757	4.75e-06
GO_REGULATION_OF_ADAPTIVE_IMMUNE_RESPONSE	asthma	0.00198453	0.000434018	4.57246	4.82e-06
GO_ACTIVIN_RECEPTOR_SIGNALING_PATHWAY	height	0.00610458	0.00133549	4.57104	4.85e-06
GO_INTRACELLULAR_RECEPTOR_SIGNALING_PATHWAY	menarche	0.00167694	0.000366922	4.57028	4.87e-06
GO_PROSTATE_GLAND_GROWTH	BMD	0.00704911	0.00154254	4.56982	4.88e-06
REACTOME_ANTIGEN_ACTIVATES_B_CELL_RECEPTOR_BCR_LEADING_TO_GENERATION_OF_SECOND_MESSENGERS	platelet	0.00571813	0.00125282	4.56419	5.02e-06
REACTOME_CARGO_TRAFFICKING_TO_THE_PERICILIARY_MEMBRANE	BMI	0.00462862	0.00101412	4.56419	5.02e-06
BIOCARTA_TH1TH2_PATHWAY	asthma	0.00554379	0.00121489	4.56322	5.04e-06
GO_INOSITOL_PHOSPHATE_METABOLIC_PROCESS	SBP	0.00310983	0.000681525	4.56304	5.04e-06
BIOCARTA_PROTEASOME_PATHWAY	intelligence	0.00624778	0.00137032	4.55937	5.13e-06
REACTOME_METABOLISM_OF_STEROID_HORMONES	height	0.00865741	0.00189891	4.55915	5.14e-06
GO_ROSTROCAUDAL_NEURAL_TUBE_PATTERNING	rhinitis	0.00642843	0.00141024	4.5584	5.16e-06
GO_DIENCEPHALON_DEVELOPMENT	rhinitis	0.00263461	0.000578022	4.55798	5.17e-06
GO_RESPONSE_TO_TRANSFORMING_GROWTH_FACTOR_BETA	height	0.00256063	0.000562041	4.55594	5.22e-06
GO_FOREBRAIN_REGIONALIZATION	SBP	0.00555649	0.00121985	4.55504	5.24e-06
GO_RESPONSE_TO_TOPOLOGICALLY_INCORRECT_PROTEIN	alcohol	0.00190082	0.000417345	4.55456	5.25e-06
REACTOME_REGULATION_OF_MRNA_STABILITY_BY_PROTEINS_THAT_BIND_AU_RICH_ELEMENTS	asthma	0.00280381	0.000615606	4.55456	5.25e-06
PID_TCR_RAS_PATHWAY	rhinitis	0.00637917	0.00140132	4.55225	5.31e-06
WP_PTF1A_RELATED_REGULATORY_PATHWAY	SBP	0.00739725	0.0016266	4.54768	5.43e-06
GO_NATURAL_KILLER_CELL_ACTIVATION	asthma	0.00294863	0.000648972	4.54354	5.53e-06
GO_DIVALENT_INORGANIC_CATION_HOMEOSTASIS	SBP	0.00125026	0.00027519	4.54327	5.54e-06
GO_REGULATION_OF_MUSCLE_CELL_DIFFERENTIATION	BMD	0.00224202	0.000493792	4.54041	5.62e-06
GO_FEMALE_GENITALIA_DEVELOPMENT	BMD	0.00621766	0.00137073	4.53603	5.73e-06
GO_POSITIVE_REGULATION_OF_BINDING	BMD	0.00217442	0.000479736	4.53252	5.83e-06
REACTOME_NOTCH3_ACTIVATION_AND_TRANSMISSION_OF_SIGNAL_TO_THE_NUCLEUS	BMD	0.00551155	0.00121609	4.53219	5.84e-06
GO_SMOOTHENED_SIGNALING_PATHWAY	height	0.00349896	0.000772071	4.53191	5.85e-06
REACTOME_ACTIVATION_OF_NMDA_RECEPTORS_AND_POSTSYNAPTIC_EVENTS	BMI	0.00337024	0.000744817	4.52492	6.04e-06
GO_NEGATIVE_REGULATION_OF_GENE_SILENCING	SBP	0.00580464	0.00128308	4.52397	6.07e-06
GO_REGULATION_OF_RECEPTOR_BINDING	height	0.00726752	0.00160751	4.52097	6.16e-06
GO_AMMONIUM_TRANSPORT	platelet	0.0112854	0.00249709	4.51941	6.2e-06
GO_LYMPH_NODE_DEVELOPMENT	rhinitis	0.00564959	0.00125008	4.51939	6.2e-06
REACTOME_UPTAKE_AND_FUNCTION_OF_ANTHRAX_TOXINS	height	0.0118028	0.00261354	4.51603	6.3e-06
GO_NEGATIVE_REGULATION_OF_INTERLEUKIN_1_PRODUCTION	FVC	0.00532318	0.00117876	4.51591	6.31e-06
GO_CELL_ADHESION_MOLECULE_PRODUCTION	asthma	0.00698119	0.00154606	4.51546	6.32e-06
GO_REGULATION_OF_GTPASE_ACTIVITY	rhinitis	0.0011205	0.000248352	4.51174	6.43e-06
WP_MYOMETRIAL_RELAXATION_AND_CONTRACTION_PATHWAYS	chronotype	0.00188485	0.000417852	4.51082	6.46e-06
KEGG_RENAL_CELL_CARCINOMA	rhinitis	0.00287287	0.000637099	4.50931	6.51e-06
GO_EXTRACELLULAR_MATRIX_CONSTITUENT_SECRETION	rhinitis	0.00765752	0.00169859	4.50817	6.54e-06
REACTOME_SIGNALING_BY_FGFR	FVC	0.00288008	0.000639048	4.50683	6.58e-06
GO_RESPONSE_TO_ALKALOID	BMI	0.00293173	0.00065135	4.50102	6.76e-06
GO_REGULATION_OF_DNA_METABOLIC_PROCESS	asthma	0.00138657	0.000308214	4.49871	6.84e-06
GO_REGULATION_OF_PROTEIN_CONTAINING_COMPLEX_DISASSEMBLY	BMD	0.00267895	0.000595736	4.49688	6.9e-06
GO_REGULATION_OF_CELL_MATURATION	height	0.00864655	0.00192298	4.49642	6.91e-06
GO_NEUROINFLAMMATORY_RESPONSE	rhinitis	0.00306512	0.000681776	4.49579	6.93e-06
GO_RESPONSE_TO_STIMULUS_INVOLVED_IN_REGULATION_OF_MUSCLE_ADAPTATION	alcohol	0.00569174	0.0012663	4.49479	6.97e-06
GO_T_HELPER_17_TYPE_IMMUNE_RESPONSE	rhinitis	0.00459455	0.00102222	4.49469	6.97e-06
GO_MESODERMAL_CELL_DIFFERENTIATION	SBP	0.00388691	0.00086497	4.49369	7e-06
GO_MIDDLE_EAR_MORPHOGENESIS	height	0.00822516	0.00183235	4.48885	7.16e-06
KEGG_LONG_TERM_POTENTIATION	rhinitis	0.00283674	0.000632754	4.48316	7.36e-06
GO_RNA_CATABOLIC_PROCESS	asthma	0.00135042	0.000301366	4.48099	7.43e-06
GO_REGULATION_OF_MITOCHONDRIAL_MEMBRANE_POTENTIAL	insomnia	0.00295382	0.000659793	4.47689	7.58e-06
GO_REGULATION_OF_HEART_RATE	SBP	0.0024508	0.000547554	4.47591	7.61e-06
GO_DEPHOSPHORYLATION	rhinitis	0.00115852	0.000259083	4.47161	7.76e-06
REACTOME_COPI_INDEPENDENT_GOLGI_TO_ER_RETROGRADE_TRAFFIC	insomnia	0.00336726	0.000753554	4.46851	7.88e-06
GO_NEGATIVE_REGULATION_OF_ENDOPLASMIC_RETICULUM_UNFOLDED_PROTEIN_RESPONSE	rhinitis	0.00725974	0.00162517	4.46707	7.93e-06
GO_REGULATION_OF_PEPTIDASE_ACTIVITY	height	0.00222885	0.000499546	4.46174	8.13e-06
GO_PATTERN_RECOGNITION_RECEPTOR_SIGNALING_PATHWAY	asthma	0.00177916	0.000398938	4.45974	8.21e-06
WP_MAPK_AND_NFKB_SIGNALLING_PATHWAYS_INHIBITED_BY_YERSINIA_YOPJ	rhinitis	0.00719949	0.00161447	4.45934	8.22e-06
GO_LYMPHOCYTE_MIGRATION	FVC	0.00274773	0.000616226	4.45896	8.24e-06
REACTOME_ACTIVATION_OF_MATRIX_METALLOPROTEINASES	asthma	0.00452013	0.00101396	4.45788	8.28e-06
GO_POSITIVE_REGULATION_OF_VIRAL_PROCESS	FVC	0.00294591	0.000661065	4.45632	8.34e-06
WP_B_CELL_RECEPTOR_SIGNALING_PATHWAY	rhinitis	0.0022495	0.000504929	4.45508	8.39e-06
KEGG_FRUCTOSE_AND_MANNOSE_METABOLISM	insomnia	0.00396123	0.000890048	4.45058	8.57e-06
GO_EPITHELIAL_TUBE_MORPHOGENESIS	FVC	0.00139953	0.000314551	4.44928	8.62e-06
GO_MODULATION_OF_PROCESS_OF_OTHER_ORGANISM	insomnia	0.00239028	0.000537261	4.449	8.63e-06
GO_NODAL_SIGNALING_PATHWAY	asthma	0.00562982	0.00126555	4.44852	8.65e-06
GO_DNA_REPLICATION	rhinitis	0.00161322	0.00036269	4.44792	8.67e-06
WP_GLUCURONIDATION	insomnia	0.0055975	0.00125884	4.44656	8.73e-06
REACTOME_PROCESSIVE_SYNTHESIS_ON_THE_C_STRAND_OF_THE_TELOMERE	insomnia	0.00559764	0.00125988	4.443	8.87e-06
GO_MATURATION_OF_5_8S_RRNA	insomnia	0.00399377	0.000899037	4.44227	8.9e-06
WP_CILIARY_LANDSCAPE	platelet	0.00240272	0.00054093	4.44182	8.92e-06
GO_RESPONSE_TO_CAFFEINE	FVC	0.00538681	0.00121289	4.44131	8.94e-06
GO_REGULATION_OF_RESPONSE_TO_WOUNDING	FVC	0.00196175	0.000441756	4.44081	8.96e-06
GO_CHEMICAL_HOMEOSTASIS_WITHIN_A_TISSUE	insomnia	0.00600999	0.00135428	4.43776	9.09e-06
PID_TOLL_ENDOGENOUS_PATHWAY	rhinitis	0.00519506	0.00117091	4.43676	9.13e-06
REACTOME_MAPK_FAMILY_SIGNALING_CASCADES	rhinitis	0.00133106	0.00030032	4.43214	9.33e-06
WP_ALLOGRAFT_REJECTION	asthma	0.00279941	0.000631885	4.43026	9.41e-06
BIOCARTA_SODD_PATHWAY	asthma	0.00774301	0.00174906	4.42695	9.56e-06
GO_QUINONE_METABOLIC_PROCESS	intelligence	0.00426715	0.000963979	4.4266	9.57e-06
GO_NEGATIVE_REGULATION_OF_RESPONSE_TO_DNA_DAMAGE_STIMULUS	SBP	0.00320721	0.000724533	4.42659	9.58e-06
REACTOME_ABC_TRANSPORTER_DISORDERS	asthma	0.00297639	0.000672476	4.42602	9.6e-06
GO_NEGATIVE_REGULATION_OF_TUMOR_NECROSIS_FACTOR_SUPERFAMILY_CYTOKINE_PRODUCTION	asthma	0.0032445	0.000733428	4.42375	9.7e-06
GO_BLOOD_VESSEL_REMODELING	platelet	0.00496112	0.00112275	4.41872	9.93e-06
GO_REGULATION_OF_DNA_CATABOLIC_PROCESS	platelet	0.0107391	0.00243146	4.41673	1e-05
GO_NEGATIVE_REGULATION_OF_EPITHELIAL_CELL_APOPTOTIC_PROCESS	asthma	0.00335255	0.000759371	4.4149	1.01e-05
REACTOME_MITOTIC_G2_G2_M_PHASES	platelet	0.00251289	0.000569331	4.41376	1.02e-05
GO_KERATINOCYTE_MIGRATION	BMI	0.00622262	0.00140986	4.41364	1.02e-05
GO_INTERLEUKIN_2_PRODUCTION	rhinitis	0.00305014	0.00069129	4.41225	1.02e-05
BIOCARTA_IGF1MTOR_PATHWAY	height	0.00922041	0.00209008	4.41151	1.03e-05
WP_PI3KAKT_SIGNALING_PATHWAY	asthma	0.00126681	0.000287186	4.41112	1.03e-05
ST_TUMOR_NECROSIS_FACTOR_PATHWAY	rhinitis	0.00466109	0.00105694	4.40999	1.03e-05
GO_LIPID_HOMEOSTASIS	alcohol	0.00214246	0.00048613	4.40717	1.05e-05
GO_REGULATION_OF_MORPHOGENESIS_OF_A_BRANCHING_STRUCTURE	FVC	0.00312673	0.000709559	4.40659	1.05e-05
GO_MYOBLAST_DIFFERENTIATION	height	0.00425439	0.000965544	4.40621	1.05e-05
GO_CELL_FATE_COMMITMENT	FVC	0.00155817	0.000353711	4.4052	1.06e-05
GO_GRANULOCYTE_DIFFERENTIATION	platelet	0.00567934	0.00128931	4.40495	1.06e-05
REACTOME_SIGNALING_BY_WNT_IN_CANCER	BMD	0.00449775	0.0010216	4.40264	1.07e-05
GO_GLANDULAR_EPITHELIAL_CELL_DIFFERENTIATION	FVC	0.00358848	0.000815796	4.39875	1.09e-05
GO_VIRAL_GENE_EXPRESSION	insomnia	0.00182524	0.000414958	4.39861	1.09e-05
GO_MICROTUBULE_ORGANIZING_CENTER_ORGANIZATION	chronotype	0.00218708	0.000497411	4.39693	1.1e-05
BIOCARTA_PDZS_PATHWAY	BMD	0.00559759	0.00127342	4.39571	1.1e-05
WP_GDNFRET_SIGNALLING_AXIS	BMD	0.00433828	0.000986975	4.39553	1.11e-05
GO_REGULATION_OF_PROTON_TRANSPORT	height	0.0115529	0.00262879	4.39474	1.11e-05
WP_NUCLEOTIDEBINDING_OLIGOMERIZATION_DOMAIN_NOD_PATHWAY	FVC	0.00463462	0.00105498	4.39308	1.12e-05
GO_MIDDLE_EAR_MORPHOGENESIS	FVC	0.00517935	0.00118035	4.38796	1.14e-05
GO_REGULATION_OF_NUCLEOTIDE_BINDING_OLIGOMERIZATION_DOMAIN_CONTAINING_SIGNALING_PATHWAY	platelet	0.0117828	0.00268543	4.38769	1.15e-05
BIOCARTA_IGF1_PATHWAY	height	0.00857245	0.00195547	4.38384	1.17e-05
REACTOME_DARPP_32_EVENTS	chronotype	0.00495225	0.00112974	4.38353	1.17e-05
PID_BCR_5PATHWAY	rhinitis	0.002921	0.000666436	4.38302	1.17e-05
WP_RETINOBLASTOMA_GENE_IN_CANCER	height	0.00446618	0.00101953	4.38064	1.18e-05
GO_NEGATIVE_REGULATION_OF_MRNA_METABOLIC_PROCESS	chronotype	0.00312074	0.000712453	4.38027	1.19e-05
GO_INHIBITORY_POSTSYNAPTIC_POTENTIAL	smoke	0.00538959	0.00123048	4.38006	1.19e-05
REACTOME_CAMK_IV_MEDIATED_PHOSPHORYLATION_OF_CREB	rhinitis	0.00724202	0.00165378	4.37908	1.19e-05
GO_EPITHELIAL_CELL_APOPTOTIC_PROCESS	alcohol	0.00213922	0.000488553	4.37868	1.19e-05
GO_VASCULAR_ENDOTHELIAL_CELL_PROLIFERATION	platelet	0.0062882	0.00143673	4.37674	1.2e-05
GO_CELLULAR_RESPONSE_TO_NITROGEN_STARVATION	BMD	0.00882789	0.00201726	4.37617	1.21e-05
GO_INTERFERON_GAMMA_PRODUCTION	rhinitis	0.00234666	0.000536782	4.37173	1.23e-05
WP_SIMPLIFIED_DEPICTION_OF_MYD88_DISTINCT_INPUTOUTPUT_PATHWAY	rhinitis	0.00552794	0.00126502	4.36984	1.24e-05
WP_22Q112_DELETION_SYNDROME	BMD	0.00396178	0.000906861	4.36867	1.25e-05
GO_NEGATIVE_REGULATION_OF_INTRACELLULAR_TRANSPORT	chronotype	0.00327784	0.000750358	4.36837	1.25e-05
REACTOME_NOTCH4_ACTIVATION_AND_TRANSMISSION_OF_SIGNAL_TO_THE_NUCLEUS	BMD	0.00782102	0.00179045	4.36819	1.25e-05
PID_AR_TF_PATHWAY	rhinitis	0.00332855	0.000762078	4.36772	1.26e-05
GO_MYOBLAST_MIGRATION	insomnia	0.00553906	0.00126845	4.36678	1.26e-05
PID_VEGF_VEGFR_PATHWAY	menarche	0.00626825	0.00143633	4.36407	1.28e-05
GO_RESPONSE_TO_ANTIBIOTIC	platelet	0.00462422	0.0010601	4.36208	1.29e-05

## Sheet: h
cell type/tissue	trait	regression coefficient	standard error	t.value	p value	type
Fetal_Megakaryocyte	platelet	0.00317631	0.000329639	9.63572	5.67e-22	cell
HSC.NK_adult	rhinitis	0.00141347	0.000164256	8.60529	7.63e-18	tissue
HSC.B_adult	rhinitis	0.00131101	0.000156832	8.35934	6.32e-17	tissue
BLD.TREG_adult	rhinitis	0.00149096	0.000183685	8.11696	4.79e-16	tissue
STRM.EMB.LUNG.FIBR_embryonic	height	0.00215046	0.000275342	7.81015	5.72e-15	tissue
Fetal_Erythroblast_1	platelet	0.00289915	0.000372126	7.79075	6.67e-15	cell
BLD.CD8T_adult	rhinitis	0.00129233	0.000166266	7.77268	7.7e-15	tissue
BLD.CD4T_adult	rhinitis	0.00127004	0.000169782	7.48042	7.42e-14	tissue
SPLN.SPLEEN_child	platelet	0.0019228	0.000261984	7.33937	2.15e-13	tissue
LCL.LCL.GM12875_adult	rhinitis	0.0014006	0.000202012	6.93325	4.12e-12	tissue
BLD.T1_adult	rhinitis	0.00125648	0.000185236	6.78313	1.18e-11	tissue
THYM.EMB.THYMUS_embryonic	rhinitis	0.00106153	0.00016024	6.62464	3.48e-11	tissue
Fetal_Endothelial_Hepatic_1	platelet	0.00200716	0.000304521	6.59119	4.37e-11	cell
Fetal_Erythroblast_3	platelet	0.00195775	0.000300709	6.51044	7.5e-11	cell
BLD.T_adult	rhinitis	0.0011064	0.000171438	6.45363	1.09e-10	tissue
BRN.HPC_adult	smoke	0.000896378	0.000141405	6.33908	2.31e-10	tissue
SPLN.EMB.SPLEEN_embryonic	platelet	0.00160175	0.000255449	6.27033	3.61e-10	tissue
Fetal_Endothelial_Hepatic_2	platelet	0.00223574	0.000357347	6.2565	3.94e-10	cell
HRT.THRCIC.AORTA_adult	height	0.0017182	0.000276232	6.22014	4.97e-10	tissue
Fibro_Muscle	height	0.00240313	0.000393927	6.10044	1.06e-09	cell
BLD.TREG_adult	asthma	0.0010914	0.000178993	6.09748	1.08e-09	tissue
BLD.MONONUC_adult	rhinitis	0.00098265	0.000165692	5.9306	3.02e-09	tissue
Fibro_General	height	0.00201621	0.000340015	5.92976	3.04e-09	cell
HSC.B_adult	platelet	0.00124007	0.000213815	5.79972	6.65e-09	tissue
BLD.T1_adult	asthma	0.00102659	0.000180502	5.68742	1.29e-08	tissue
LNG.LUNG_child	SBP	0.000954498	0.000168907	5.65101	1.6e-08	tissue
HRT.RIGHT.VENTR_adult	SBP	0.00100372	0.000178327	5.6285	1.82e-08	tissue
STRM.FRSKN.FIBR_newborn	height	0.00163625	0.000291062	5.62168	1.89e-08	tissue
KDNY.KIDNEY_adult	platelet	0.00121214	0.00021823	5.55444	2.79e-08	tissue
Fetal_Erythroblast_2	platelet	0.00206295	0.000371545	5.55236	2.82e-08	cell
BRN.HPC_adult	alcohol	0.000814534	0.000147115	5.53672	3.08e-08	tissue
Fibro_GI	height	0.00214881	0.000393246	5.46429	4.65e-08	cell
LCL.LCL.GM19239_adult	rhinitis	0.00100482	0.0001859	5.40517	6.48e-08	tissue
HSC.CD34.CMP_adult	platelet	0.00104763	0.000194008	5.39994	6.67e-08	tissue
HRT.LEFT.VENTR_child	SBP	0.000908033	0.000169007	5.37276	7.76e-08	tissue
Fibro_Epithelial	height	0.00209162	0.000389624	5.36829	7.95e-08	cell
PCTA.PLACENTA_embryonic	platelet	0.00105916	0.000198073	5.34731	8.93e-08	tissue
BLD.CD4T_adult	asthma	0.000877453	0.000165445	5.30359	1.14e-07	tissue
LCL.LCL.GM12875_adult	platelet	0.00144294	0.000275407	5.23928	1.61e-07	tissue
HRT.RIGHT.VENTR_child	SBP	0.000963111	0.000185523	5.19134	2.09e-07	tissue
SPLN.SPLEEN_adult	platelet	0.00100819	0.000194485	5.18388	2.17e-07	tissue
LVR.EMB.LIVER_embryonic	platelet	0.00134107	0.000260087	5.15624	2.52e-07	tissue
ESDV.NEURAL.CELL_embryonic	menarche	0.000828846	0.000161476	5.13293	2.85e-07	tissue
HSC.NK_adult	asthma	0.000818605	0.000160063	5.11426	3.15e-07	tissue
BLD.MONONUC_adult	platelet	0.00114322	0.000225889	5.061	4.17e-07	tissue
HRT.LEFT.VENTR_adult	SBP	0.00084561	0.000167352	5.0529	4.35e-07	tissue
HSC.MPP_adult	platelet	0.00104837	0.000207779	5.04558	4.52e-07	tissue
Vasc_Sm_Muscle_1	height	0.00191018	0.00038107	5.01269	5.37e-07	cell
MUSC.SKELETAL.MUSCLE_adult	SBP	0.000862844	0.000172348	5.00641	5.55e-07	tissue
Cardiac_Fibroblast	height	0.00169075	0.000340398	4.96697	6.8e-07	cell
PNS.SPINAL.CRD_embryonic	insomnia	0.000707712	0.000142554	4.96451	6.89e-07	tissue
Fibro_Nerve	height	0.00205688	0.000415571	4.94951	7.44e-07	cell
Mast	platelet	0.00167607	0.000339338	4.93925	7.84e-07	cell
BRN.CING.GYR_adult	smoke	0.000681301	0.000138019	4.93628	7.97e-07	tissue
STRM.FRSKN.FIBR_newborn	BMD	0.000965309	0.000195663	4.93354	8.08e-07	tissue
MUSC.PSOAS.MUSCLE_child	SBP	0.000915838	0.000186138	4.92022	8.65e-07	tissue
Satellite	height	0.00210379	0.000431244	4.87842	1.07e-06	cell
Vasc_Sm_Muscle_2	height	0.00193607	0.000397611	4.86925	1.12e-06	cell
LCL.LCL.GM12875_adult	asthma	0.000955933	0.000196851	4.85613	1.2e-06	tissue
ESDV.MESENCH.STEM_embryonic	height	0.00118689	0.000248475	4.77668	1.78e-06	tissue
HSC.CD34.CMP_adult	rhinitis	0.000677282	0.000142308	4.75925	1.94e-06	tissue
HRT.ASC.AORTA_adult	height	0.00143523	0.000302611	4.74282	2.11e-06	tissue
SMTH.STOM.MUSCLE_adult	height	0.00137078	0.000290483	4.71895	2.37e-06	tissue
Fetal_Endothelial_General_2	platelet	0.00145491	0.000309511	4.70068	2.59e-06	cell
BLD.CD8T_adult	asthma	0.000758556	0.00016202	4.68186	2.84e-06	tissue
BRN.EMB.GERM.MTX_embryonic	alcohol	0.000651354	0.000139806	4.65899	3.18e-06	tissue
SPLN.EMB.SPLEEN_embryonic	rhinitis	0.000872096	0.000187378	4.6542	3.25e-06	tissue
BRN.FTL.CTX_adult	rhinitis	0.000877241	0.000189184	4.63696	3.54e-06	tissue
BRN.CING.GYR_adult	alcohol	0.000662667	0.000143592	4.61493	3.93e-06	tissue
HRT.LEFT.VENTR_adult	platelet	0.000969113	0.000210073	4.61322	3.97e-06	tissue
HRT.RIGHT.ATRIUM_adult	SBP	0.000817669	0.000177257	4.61289	3.97e-06	tissue
SPLN.SPLEEN_child	rhinitis	0.000886312	0.000192174	4.61202	3.99e-06	tissue
GI.ESOPH.MUSC.MUC_adult	SBP	0.000925513	0.00020147	4.5938	4.35e-06	tissue
Fetal_Hematopoeitic_Stem	platelet	0.00167564	0.000364871	4.59244	4.38e-06	cell
LCL.LCL.GM19240_adult	rhinitis	0.000871384	0.000190036	4.58537	4.53e-06	tissue
BRN.CING.GYR_adult	insomnia	0.00062121	0.0001356	4.58119	4.62e-06	tissue
PCTA.PLACENTA_embryonic	asthma	0.000647982	0.000141576	4.57692	4.72e-06	tissue
MUSC.EMB.TRUNK.MUSCLE_embryonic	FVC	0.000856826	0.000188307	4.55016	5.36e-06	tissue
HRT.THRCIC.AORTA_adult	SBP	0.000778454	0.000171235	4.54611	5.47e-06	tissue
HRT.LEFT.VENTR_adult	FVC	0.000788911	0.00017392	4.53605	5.73e-06	tissue
PCTA.PLACENTA_embryonic	rhinitis	0.000656978	0.000145291	4.52182	6.13e-06	tissue
MUSC.SKELETAL.MUSCLE_adult	BMD	0.000843322	0.000186903	4.51209	6.42e-06	tissue
ESDV.NEURAL.CELL_embryonic	smoke	0.000647246	0.0001443	4.48541	7.28e-06	tissue
Pericyte_General_3	height	0.00182696	0.000409021	4.46667	7.95e-06	cell
HSC.B_adult	asthma	0.000682566	0.000152829	4.46622	7.96e-06	tissue
BRN.EMB.GERM.MTX_embryonic	chronotype	0.00064249	0.000144452	4.44777	8.68e-06	tissue
HRT.ASC.AORTA_adult	BMD	0.000896396	0.000203426	4.4065	1.05e-05	tissue
Fetal_Hepatoblast	platelet	0.00117967	0.000267932	4.40287	1.07e-05	cell
BRN.HPC_adult	insomnia	0.000610617	0.000138929	4.39518	1.11e-05	tissue
Fetal_Endothelial_Placental	platelet	0.00188794	0.00043036	4.38689	1.15e-05	cell
HRT.RIGHT.VENTR_child	alcohol	0.000737152	0.000168061	4.38623	1.15e-05	tissue
MUSC.SKELETAL.MUSCLE_adult	platelet	0.000945409	0.000216345	4.36991	1.24e-05	tissue
LCL.LCL.GM12878_adult	rhinitis	0.000697836	0.000160352	4.3519	1.35e-05	tissue
Fetal_Mesangial_2	height	0.00179239	0.000412408	4.34617	1.39e-05	cell
Fetal_Erythroblast_4	platelet	0.00187914	0.000432727	4.34254	1.41e-05	cell
Type_II_Skeletal_Myocyte	BMI	0.00125542	0.000289976	4.3294	1.5e-05	cell
HRT.ASC.AORTA_adult	SBP	0.000811189	0.000187585	4.32439	1.53e-05	tissue
HSC.MPP_adult	rhinitis	0.000658735	0.00015241	4.32212	1.55e-05	tissue
HSC.CD14.MONOCYTE_adult	rhinitis	0.000680653	0.000157513	4.32125	1.55e-05	tissue
Fetal_V_Cardiomyocyte	SBP	0.000909578	0.000211045	4.30988	1.63e-05	cell
GI.ESOPH.MUSC.MUC_adult	chronotype	0.000812525	0.000188571	4.30885	1.64e-05	tissue
BLD.T_adult	asthma	0.000719813	0.000167058	4.30876	1.64e-05	tissue
STRM.SKIN.FIBR_adult	height	0.00121502	0.000282748	4.29717	1.73e-05	tissue
ESDV.MESENCH.STEM_embryonic	BMD	0.000716954	0.000167034	4.29227	1.77e-05	tissue
MUSC.GASTR.MED_adult	height	0.00122189	0.000287027	4.25705	2.07e-05	tissue
IPSC.DF19.11_newborn	insomnia	0.0005009	0.000118332	4.23302	2.31e-05	tissue
HSC.CD14.MONOCYTE_adult	platelet	0.000904558	0.000214737	4.21239	2.53e-05	tissue
HRT.RIGHT.VENTR_adult	BMD	0.000814295	0.000193389	4.21067	2.55e-05	tissue
Fetal_Retinal_Neuron	alcohol	0.000828911	0.000199089	4.16352	3.13e-05	cell
ESDV.NEURAL.CELL_embryonic	intelligence	0.000620155	0.000149089	4.15963	3.19e-05	tissue
Sm_Ms_Muscularis_3	height	0.00156523	0.000379281	4.12685	3.68e-05	cell
HRT.HEART_adult	rhinitis	0.000809121	0.000196448	4.11875	3.81e-05	tissue
EDCR.REPR.OVARY_adult	SBP	0.000686309	0.000166855	4.11319	3.9e-05	tissue
Natural_Killer_T	rhinitis	0.00112854	0.00027601	4.08878	4.34e-05	cell
BLD.T_adult	platelet	0.000947738	0.000233726	4.0549	5.02e-05	tissue
KDNY.EMB.KIDNEY_embryonic	FVC	0.000724883	0.000179511	4.0381	5.39e-05	tissue
LVR.EMB.LIVER_embryonic	rhinitis	0.000770322	0.00019078	4.03776	5.4e-05	tissue
Type_II_Skeletal_Myocyte	menarche	0.000975268	0.000241643	4.03599	5.44e-05	cell
KDNY.KIDNEY_adult	SBP	0.000699715	0.000173852	4.02476	5.7e-05	tissue
GI.SIG.COLON_child	platelet	0.000951927	0.00023663	4.02286	5.75e-05	tissue
HRT.RIGHT.VENTR_child	FVC	0.00077341	0.000192806	4.01135	6.04e-05	tissue
Fetal_Retinal_Neuron	menarche	0.000858877	0.000214142	4.01078	6.05e-05	cell
Alveolar_Cap_Endo	platelet	0.00139064	0.000347058	4.00693	6.15e-05	cell
Natural_Killer_T	asthma	0.00107631	0.000268954	4.00184	6.29e-05	cell
THYM.THYMUS_child	rhinitis	0.000661692	0.000165928	3.98783	6.67e-05	tissue
Nerve_Stromal	height	0.00155877	0.000392216	3.97425	7.06e-05	cell
ESDV.TROPHOBLAST_embryonic	BMD	0.000631898	0.000159697	3.95687	7.59e-05	tissue
MUSC.PSOAS.MUSCLE_child	chronotype	0.00068853	0.000174221	3.95205	7.75e-05	tissue
GI.SMALL.INT_adult	platelet	0.000816993	0.000206876	3.94919	7.84e-05	tissue
HRT.RIGHT.VENTR_child	BMD	0.000793855	0.000201191	3.94577	7.96e-05	tissue
PANC.BODY.PANCREAS_adult	menarche	0.000680808	0.000172585	3.94478	7.99e-05	tissue
STRM.GINGVL.FIBR_adult	height	0.00139203	0.000353474	3.93813	8.21e-05	tissue
HRT.RIGHT.VENTR_adult	BMI	0.000820492	0.000208514	3.93495	8.32e-05	tissue
HRT.LEFT.VENTR_adult	BMD	0.00071321	0.000181485	3.92985	8.5e-05	tissue
Endothelial_Exocrine	platelet	0.00123944	0.000318558	3.89077	9.99e-05	cell
MUSC.PSOAS.MUSCLE_child	menarche	0.000705307	0.000181367	3.88884	0.000100737	tissue
BRN.CAUD.NUC_adult	intelligence	0.000554921	0.000142894	3.88346	0.000102993	tissue
PNS.SPINAL.CRD_embryonic	FVC	0.000668639	0.000173183	3.86087	0.000112995	tissue
GI.EMB.STOMACH_embryonic	FVC	0.000688396	0.000178685	3.85257	0.000116898	tissue
GI.ESOPH.MUSC.MUC_adult	alcohol	0.000701467	0.000182507	3.84351	0.0001213	tissue
LCL.LCL.GM08714_child	rhinitis	0.000665856	0.000173394	3.84014	0.000122978	tissue
HSC.LYMPHOCYTE_child	platelet	0.00093347	0.000243792	3.82896	0.000128697	tissue
Type_II_Skeletal_Myocyte	SBP	0.000948237	0.000248001	3.82352	0.000131572	cell
GI.STOMACH_child	BMD	0.000688082	0.00018049	3.8123	0.000137693	tissue
MUSC.GASTR.MED_adult	BMD	0.000729084	0.00019295	3.77863	0.000157712	tissue
ESDV.CARD.MUSCLE_embryonic	intelligence	0.000570838	0.000151299	3.77291	0.000161373	tissue
Type_I_Skeletal_Myocyte	BMD	0.000946925	0.000251713	3.76192	0.000168631	cell
BRN.SUB.NG_adult	insomnia	0.000522036	0.000138994	3.75581	0.000172801	tissue
THYM.EMB.THYMUS_embryonic	platelet	0.000819961	0.000218461	3.75335	0.000174502	tissue
BRN.CING.GYR_adult	chronotype	0.000556815	0.000148364	3.75302	0.000174735	tissue
GI.EMB.SMALL.INT_embryonic	platelet	0.000786512	0.000209924	3.74665	0.00017923	tissue
SMTH.COLON.MUSCLE_adult	height	0.00107971	0.000289228	3.73305	0.00018919	tissue
PNS.TIBIAL.NERVE_adult	FVC	0.000759923	0.000203578	3.73284	0.00018935	tissue

## Sheet: i
id	p	PIP	posterior effect size	GO_MEGAKARYOCYTE_DIFFERENTIATION	GO_PLATELET_MORPHOGENESIS	SPLN.SPLEEN_child	Fetal_Megakaryocyte	gene	reference class
168470	4.25987e-36	1	-51.9037	1	0	1	0	THPO|POLR2H	L3_Low_signal
51880	5.66338e-81	1	6.92503	1	0	1	1	NUAK2|DSTYK|TMCC2|RBBP5	TN4_Transcription
494664	1.72768e-45	1	-377.731	1	0	1	0	SH2B3	TN4_Transcription
1130720	2.55003e-26	0.999999	21.9625	1	0	0	1	NFE2|GPR84|COPZ1	E7_Monocyte_/_Macrophage
229940	3.71788e-52	0.999998	-36.9924	1	1	1	0	MEF2C	E8_Weak_multi-tissue
168466	6.79665e-15	0.999994	6.49586	1	0	1	0	POLR2H|CLCN2|THPO	TN1_Transcription
588752	0.415737	0.999993	-0.973885	1	1	1	1	CYBA|ZFPM1|ZC3H18|SNAI3-AS1|IL17C|RNF166|MVD|ANKRD11	E12_Erythroblast-like
464014	1.697e-09	0.999993	-6.16909	1	0	1	1	FLI1|SENCR	P_Promoter
588738	8.64374e-24	0.999984	4.08214	1	1	1	1	ZFPM1|APRT	PC1_Polycomb_/_Heterochromatin
168472	4.68126e-16	0.999964	-6.4299	1	0	1	0	THPO|CHRD	PC4_Polycomb_/_Bivalent_stem_cell_Enh
464020	5.9646e-15	0.999962	12.8659	1	0	1	1	FLI1|SENCR	E6_Weak_epithelial
230006	5.05211e-21	0.999822	0.400359	1	1	1	0	MEF2C-AS1|MEF2C	E5_B-cell-like
480276	1.01461e-52	0.999164	-91.7249	1	0	1	1	NFE2|PDE1B|COPZ1	PC4_Polycomb_/_Bivalent_stem_cell_Enh
494630	1.71343e-12	0.99911	-15.1216	1	0	1	1	SH2B3|VPS29	E5_B-cell-like
494628	7.38182e-35	0.998303	147.824	1	0	1	0	SH2B3|FAM216A	TN1_Transcription
674698	0.000473165	0.997801	3.00314	1	0	1	0	RUNX1	E11_T-cell
230000	1.0165e-34	0.994647	7.72939	1	1	1	0	MEF2C	E6_Weak_epithelial
168474	8.42762e-11	0.992811	15.6029	1	0	1	1	CHRD|EPHB3|FAM131A|THPO	PC1_Polycomb_/_Heterochromatin
696632	6.20023e-07	0.938452	-37.6394	1	1	0	1	FOXE3|TAL1|STIL|FOXD2-AS1|LINC00853	PC3_Polycomb
547512	3.59206e-20	0.925228	15.3926	1	0	1	0	THBS1|GPR176	E3_Brain_/_Melanocyte
464062	2.04509e-09	0.841232	4.85605	1	0	1	1	FLI1|KCNJ1	PC1_Polycomb_/_Heterochromatin
463970	2.28745e-05	0.831665	20.54	1	0	1	1	ETS1|FLI1	L5_Low_signal
480304	4.85725e-57	0.819636	-5.10472	1	1	1	1	GPR84|NFE2|ZNF385A	CTCF_CTCF-Cohesin
532550	3.24788e-16	0.751712	1.31747	0	1	1	0	DCAF5|ZFP36L1|ACTN1	E2_Multi-tissue
155150	4.1736e-09	0.743059	5.3458	1	0	1	1	GATA2	PC4_Polycomb_/_Bivalent_stem_cell_Enh

## Sheet: j
id	b	p	PIPfull	posterior effect size	WP_DEVELOPMENT_AND_HETEROGENEITY_OF_THE_ILC_FAMILY	REACTOME_TNFR2_NON_CANONICAL_NF_KB_PATHWAY	BLD.TREG_adult	Natural_Killer_T	class	gene
262800	0.475602	0.000230281	0.510364	0.0252344	0	0	0	0	PC1_Polycomb_/_Heterochromatin	CYP21A1P|TNXB|PBX2|CFB|HCG27|HCG23
262962	0.141545	6.51e-75	1	0.0061319	0	0	1	1	E5_B-cell-like	HLA-DRB1|HLA-DQA1|HLA-DRB6|TNXA|HLA-DQA2|FKBPL|C6orf25|HLA-DRA|HLA-DQB1-AS1|HLA-DMA|HSPA1L|HCG23|PRRT1|HLA-DOB|STK19
262520	0.136724	4.36e-12	0.999987	0.0116487	0	0	1	1	E2_Multi-tissue	HCP5|EGFL8|MICA
931374	1.15616	0.000752274	0.90092	0.124452	0	0	0	0	PC3_Polycomb	MOG|OR2H2
262442	-0.0938749	4.36e-15	0.999983	-0.0077716	0	0	1	0	E2_Multi-tissue	PSORS1C1|HCG22|C6orf48
262966	1.13257	3.66e-26	0.999978	0.063599	0	0	1	0	L4_Low_signal	COL11A2|HLA-DRB6|VWA7|HLA-DRB5|ATF6B|VPS52|HLA-DQA1|HLA-DRB1|HLA-DMA|CYP21A1P
931808	1.75117	6.18e-19	0.969831	0.111717	0	0	0	0	E7_Monocyte_/_Macrophage	HLA-DOB|TAP2|LSM2|RPS18|TAPBP
263014	-1.37309	4.68e-16	0.999938	-0.106724	0	1	1	1	TN1_Transcription	PSMB8|PSMB9|HLA-DMA|TAP2|TAP1
931720	-2.24671	2.48e-70	0.999651	-0.0976235	0	0	1	0	HET1_Heterochromatin	HLA-DRB6|PBX2|C2|C4A|NOTCH4|HCG23|BTNL2
261870	-0.667098	3.09e-11	0.991961	-0.0578795	0	0	1	0	PC4_Polycomb_/_Bivalent_stem_cell_Enh	TRIM27|PGBD1|OR2J3|OR2B6
931770	-1.29178	2.7e-38	0.994815	-0.0757471	0	0	0	0	TF2_CEBPB	PBX2|HCG23|TAP1|HLA-DMA|HLA-DQB1-AS1
262576	0.155965	8.26e-09	0.991819	0.0132063	1	1	1	1	E5_B-cell-like	CSNK2B|TNF|NFKBIL1|LST1|GPANK1|LY6G5B|LTA
262538	-0.812866	1.49e-15	0.99074	-0.0540581	0	1	1	0	PC3_Polycomb	NCR3|ABCF1|ABHD16A|CSNK2B|NRM|LTA|VWA7|MICB|LTB|PPP1R18|LST1|HCP5|HLA-B|BAG6|EHMT2|GPANK1
263082	-1.01356	3.13e-10	0.964462	-0.0681744	0	1	1	1	E5_B-cell-like	BAK1|HLA-DOA|HLA-DPB1|PSMB8
263328	0.801505	3.28e-07	0.96434	0.06765	0	1	1	0	TN1_Transcription	ITPR3|RPS10|PSMB8|CUTA|TAP1|IP6K3|UQCC2
262724	-3.49301	1.62e-17	0.88999	-0.316318	0	0	1	0	TN1_Transcription	CFB|HSPA1L|CSNK2B|STK19|CYP21A1P|NEU1
262476	-0.304758	2.89e-16	1	-0.0258497	0	0	0	0	L5_Low_signal	PSORS1C3|HCG27|POU5F1|TCF19|CCHCR1|PPT2|NCR3
262960	-3.018	3.1e-05	0.682792	-0.182304	0	0	1	1	L2_Low_signal	HCG23|SAPCD1|TNXA|HLA-DRB1|DDAH2|NEU1|C2|BAG6|HLA-DRB6|HLA-DQA1|PRRT1|LY6G6F|PBX2|EHMT2|HLA-DRA|NOTCH4|COL11A2|HLA-DQA2|HLA-DMA|HLA-DRB5|VWA7|FKBPL
931806	-2.03726	7.6e-27	1	-0.145331	0	1	0	0	L6_Low_signal	RPS18|PSMB9|HCG23|VARS|C4A|DAXX|NOTCH4

[truncated: 4 more sheets: k, l, m, n]
